# Supplementary material for: N-Sulfenyl phthalimide enabled Markovnikov hydrothiolation of unactivated alkenes via ligand promoted cobalt catalysis
Source: Royal Society of Chemistry journal article supplement (doi:10.1039/d3qo01632c), 2023-11-07

## *Electronic Supplementary Information*

### ***N*-Sulfenyl Phthalimides Enabled Markovnikov Hydrothiolation of Unactivated Alkenes *via* Ligand Promoted Cobalt Catalysis**

*Xiang-Rui Li,<sup>a,†</sup> Rong-Jin Zhang,<sup>a,†</sup> Yonghong Xiao,<sup>a</sup> Qing-Xiao Tong,<sup>a</sup> and Jian-Ji  
Zhong<sup>\*,a,b</sup>.*

<sup>a</sup> College of Chemistry and Chemical Engineering, and Key Laboratory for Preparation and Application of Ordered Structural Materials of Guangdong Province, Shantou University, Shantou 515063 (P. R. China)

<sup>b</sup> Chemistry and Chemical Engineering Guangdong Laboratory, Shantou, Guangdong 515063, P. R. China.

<sup>†</sup> These authors contributed equally to this work

\* Correspondence: jjzhong@stu.edu.cn

---

## Table of Content

|                                                                                                   |    |
|---------------------------------------------------------------------------------------------------|----|
| 1. General Information.....                                                                       | 3  |
| 2. Experimental Procedures.....                                                                   | 4  |
| 2.1) Synthesis of Ligand.....                                                                     | 4  |
| 2.2) Synthesis of starting materials.....                                                         | 6  |
| 2.3) Optimisation of silane and TBHP dosages.....                                                 | 13 |
| 2.4) General procedure for Co-catalyzed Markovnikov hydrothiolation reaction.....                 | 14 |
| 2.5) Gram-scale synthesis.....                                                                    | 15 |
| 2.6) Synthetic applications.....                                                                  | 16 |
| 2.7) Crystal structure determination of <b>c10</b> , <b>c34</b> , <b>c37</b> and <b>c38</b> ..... | 18 |
| 2.8) Deuterium labeling experiment.....                                                           | 26 |
| 2.9) Radical trapping experiments.....                                                            | 27 |
| 2.10) KIE experiment.....                                                                         | 29 |
| 2.11) Competition experiment.....                                                                 | 30 |
| 2.12) References.....                                                                             | 31 |
| 3. Analytical data of target compounds.....                                                       | 33 |
| 4. <sup>1</sup> H, <sup>13</sup> C, <sup>19</sup> F spectra of target compounds.....              | 61 |

---

## 1. General Information.

All chemicals, unless otherwise noted, were purchased from commercial sources and were used without further purification. Unless stated otherwise, all reactions were carried out under argon atmosphere. Ligand **L1-L4** were purchased from Bidepharm. Diphenylsilane ( $\text{Ph}_2\text{SiH}_2$ ) was purchased from Bidepharm. All other commercial reagents and solvents were purchased from Energy-Chemical Ltd., Bidepharm. and Macklin Biochemical Co. Ltd., respectively, and used as received unless otherwise noted. Starting materials including **a1-a11**, **a13**, **a25**, **a28**, **a34**, **a39**, **a41** and **a55** were purchased from bidepharm. and Energy-Chemical Ltd. Substrates **a12**, **a14-a24**, **a26-a27**, **a29-a33**, **a35-38**, **a40** and **b43-b53** are known compounds and were prepared according to previously reported procedures with slight modification. Biologically active molecules **a56-a63** were synthesized according to the literatures with slight modification. The material of the reaction vessel is common glass from Synthware and then put it on magnetic stirring.

The nuclear magnetic resonance spectra were recorded on the Bruker Ascend<sup>TM</sup> 400 MHz NMR spectrometer or Bruker AVANCE NEO 600 MHz NMR spectrometer with tetramethylsilane (TMS) as an internal standard. All  $^1\text{H}$  NMR data are reported in  $\delta$  units, parts per million (ppm), and were measured relative to the residual proton signal in the deuterated solvent at 7.26 ppm ( $\text{CDCl}_3$ ) and 3.31 ppm ( $d_4$ - $\text{CH}_3\text{OH}$ ). All  $^{13}\text{C}$  NMR spectra are  $^1\text{H}$  decoupled and reported in ppm relative to the solvent signal at 77.16 ppm ( $\text{CDCl}_3$ ) and 48.8 ppm ( $d_4$ - $\text{CH}_3\text{OH}$ ). High resolution mass spectra were recorded using a Q Exactive mass spectrometer (Thermo Fisher Scientific, USA). Digital melting point apparatus was used to record the Melting Point of the compound in degree centigrade ( $^\circ\text{C}$ ) and are uncorrected.

## 2. Experimental Procedures.

### 2.1) Synthesis of Ligand <sup>[1-4]</sup>.

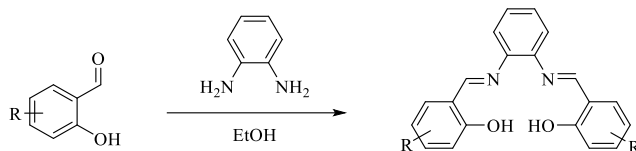

1,2-diaminobenzene (1.0 equiv., 0.5 mmol) was added to a solution of salicylaldehyde analogues (2.0 equiv., 1 mmol) in ethanol (2 mL) and stirred overnight at room temperature under argon atmosphere. The product of the reaction was filtered, washed with a small amount of hexane, and the solid residue was drained under vacuum and stored under argon atmosphere protection.

#### *L*<sub>5</sub>

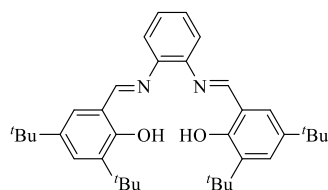

Yellow solid. 232 mg, 90% yield.

<sup>1</sup>H NMR (400 MHz, Chloroform-*d*)  $\delta$  13.58 (s, 2H), 8.69 (s, 2H), 7.47 (s, 2H), 7.34 (dt, *J* = 7.2, 3.6 Hz, 2H), 7.30 – 7.22 (m, 4H), 1.47 (s, 18H), 1.35 (s, 18H).

<sup>13</sup>C NMR (101 MHz, Chloroform-*d*)  $\delta$  164.7, 158.6, 142.8, 140.3, 137.2, 128.2, 127.3, 126.8, 119.8, 118.4, 35.1, 34.2, 31.5, 29.4.

HRMS (ESI) *m/z*: Calcd for C<sub>34</sub>H<sub>48</sub>N<sub>2</sub>O<sub>2</sub>Na [M+Na]<sup>+</sup>: 539.3608; found: 539.3610.

#### *L*<sub>6</sub>

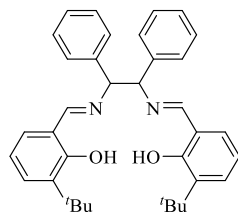

Yellow solid. 188 mg, 71% yield.

<sup>1</sup>H NMR (400 MHz, Chloroform-*d*)  $\delta$  13.81 (s, 2H), 8.39 (s, 2H), 7.30 – 7.17 (m, 12H), 7.02 (d, *J* = 7.2 Hz, 2H), 6.74 (t, *J* = 5.2 Hz, 2H), 4.75 (s, 2H), 1.45 (s, 18H).

<sup>13</sup>C NMR (101 MHz, Chloroform-*d*)  $\delta$  166.9, 160.3, 139.5, 137.1, 130.1, 129.6, 128.3, 128.0, 127.5, 118.6, 117.9, 80.2, 34.8, 29.3.

HRMS (ESI) *m/z*: Calcd for C<sub>36</sub>H<sub>40</sub>N<sub>2</sub>O<sub>2</sub>Na [M+Na]<sup>+</sup>: 555.2982; found: 555.2977.



**L<sub>7</sub>**

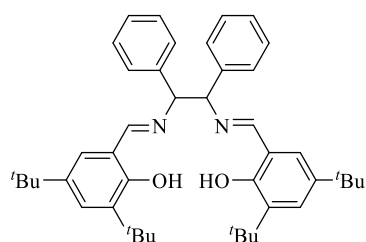

Yellow solid. 273 mg, 85% yield.

<sup>1</sup>H NMR (400 MHz, Chloroform-*d*) δ 13.62 (s, 2H), 8.42 (s, 2H), 7.33 (d, *J* = 2.5 Hz, 2H), 7.20 (q, *J* = 4.6, 3.9 Hz, 10H), 7.00 (d, *J* = 2.5 Hz, 2H), 4.75 (s, 2H), 1.44 (s, 18H), 1.23 (s, 18H).

<sup>13</sup>C NMR (101 MHz, Chloroform-*d*) δ 167.2, 158.0, 140.0, 139.8, 136.4, 128.3, 128.0, 127.4, 127.1, 126.3, 117.9, 80.1, 35.0, 34.0, 31.4, 29.4.

HRMS (ESI) *m/z*: Calcd for C<sub>44</sub>H<sub>56</sub>N<sub>2</sub>O<sub>2</sub>Na [M+Na]<sup>+</sup>: 667.4234; found: 667.4233.

**L<sub>8</sub>**

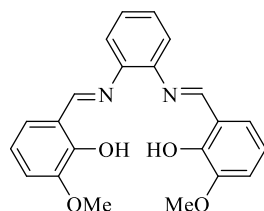

Red solid. 149 mg, 95% yield.

<sup>1</sup>H NMR (400 MHz, Chloroform-*d*) δ 13.20 (s, 2H), 8.64 (s, 2H), 7.37 – 7.31 (m, 2H), 7.22 – 7.17 (m, 2H), 7.01 (dd, *J* = 14.6, 7.8 Hz, 4H), 6.88 (t, *J* = 8.1 Hz, 2H), 3.91 (s, 6H).

<sup>13</sup>C NMR (101 MHz, Chloroform-*d*) δ 164.3, 151.6, 148.6, 142.5, 127.6, 123.9, 120.3, 119.2, 118.5, 115.1, 56.2.

HRMS (ESI) *m/z*: Calcd for C<sub>22</sub>H<sub>20</sub>N<sub>2</sub>O<sub>4</sub>Na [M+Na]<sup>+</sup>: 399.1315; found: 399.1320.

**L<sub>9</sub>**

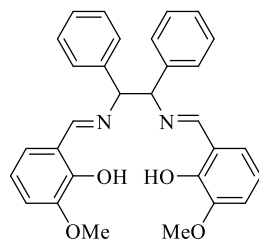

Yellow solid. 200 mg, 84% yield.

<sup>1</sup>H NMR (400 MHz, Chloroform-*d*) δ 13.83 (s, 2H), 8.39 (s, 2H), 7.27 – 7.05 (m, 10H), 7.01 – 6.69 (m, 6H), 4.72 (s, 2H), 3.91 (s, 6H).

<sup>13</sup>C NMR (101 MHz, Chloroform-*d*) δ 166.1, 151.1, 148.1, 139.1, 128.3, 127.9, 127.6, 123.4, 118.4, 118.2, 114.2, 80.3, 56.0.

HRMS (ESI) *m/z*: Calcd for C<sub>30</sub>H<sub>28</sub>N<sub>2</sub>O<sub>4</sub>Na [M+Na]<sup>+</sup>: 503.1941; found: 503.1944.

---

## 2.2) Synthesis of starting materials.

### 2.2.1 Synthesis of *N*-sulfenyl phthalimides.

#### *Method A for N-sulfenyl phthalimides* <sup>[5]</sup>:

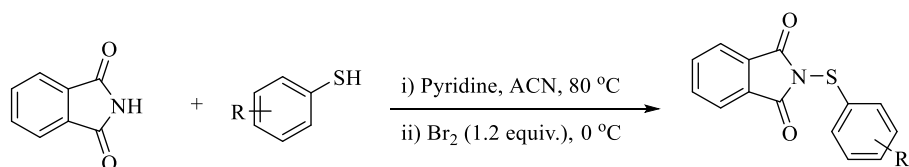

A suspension of phthalimide (1.47 g, 10.0 mmol) and thiophenols (11.0 mmol, 1.1 equiv.) in CH<sub>3</sub>CN (5.0 mL) and pyridine (4.0 mL) was heated to 80 °C and then cooled to room temperature. The mixture was treated with a solution of Br<sub>2</sub> (615 μL in 5.0 mL CH<sub>3</sub>CN, 12.0 mmol, 1.2 equiv.) dropwise over 10 mins. Upon complete addition of Br<sub>2</sub> solution, the mixture was stirred for 2 h at 0 °C and was subsequently quenched by dropwise addition of H<sub>2</sub>O (15.0 mL). Filtration of the suspension and washing of the precipitate with pre-cooled CH<sub>3</sub>OH (0 °C, 3 × 10.0 mL). Further purification was achieved by recrystallization in ethyl acetate through hot cooling to room temperature. **b44-b45** and **b48-b51** were prepared according to the above procedure.

#### *Method B for N-sulfenyl phthalimides* <sup>[5]</sup>:

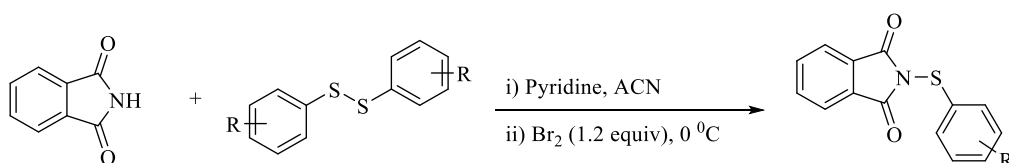

A suspension of phthalimide (1.47 g, 10.0 mmol) and disulfides (11.0 mmol, 1.1 equiv.) in CH<sub>3</sub>CN (5.0 mL) and pyridine (4.0 mL) was heated to 80 °C and then cooled to room temperature. The mixture was treated with a solution of Br<sub>2</sub> (615 μL in 5.0 mL CH<sub>3</sub>CN, 12.0 mmol, 1.2 equiv.) dropwise over 10 mins. Upon complete addition of Br<sub>2</sub> solution, the mixture was stirred for 2 h at 0 °C and was subsequently quenched by dropwise addition of H<sub>2</sub>O (15.0 mL). Filtration of the suspension and washing of the precipitate with pre-cooled CH<sub>3</sub>OH (0 °C, 3 × 10.0 mL). Further purification was achieved by recrystallization in ethyl acetate through hot cooling to room temperature. **b43**, **b46-b47**, **b52** and **b53** were prepared according to the above procedure.

## 2.2.2 Synthesis of unactivated alkenes.

### Method C <sup>16f</sup>:

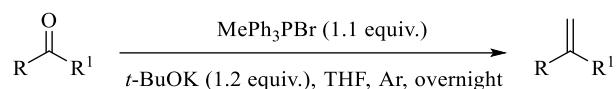

To a solution of methyltriphenylphosphonium bromide (1.13 g, 3.3 mmol) in dry THF (3 mL) was added *t*-BuOK (3.6 mL, 3.6 mmol) under argon and 0 °C ice bath and the mixture was stirred for 30 min to 1 hour. Then a solution of ketones (3.0 mmol, 1.0 equiv.) in dry THF (3.0 mL) was added slowly. The mixture was stirred overnight at room temperature. The reaction mixture passed through a silica gel pad (~ 5 g) using *n*-hexane as the eluent and the solvents were removed under reduced pressure. Purification of the crude product by flash column chromatography using *n*-hexane/ethyl acetate as the eluent afforded the substrates. **a35-a38** and **a40** were prepared according to the above procedure.

### Method D <sup>17f</sup>:

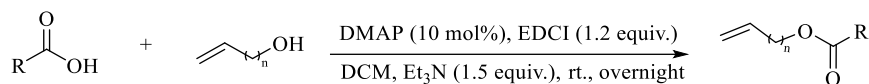

A 100 mL flask fitted with a stirring bar was charged with a solution of acids (1.1 equiv., 6.0 mmol), *N*-(3-dimethylaminopropyl)-*N*'-ethylcarbodiimide hydrochloride (EDCI, 1.15 g, 6.0 mmol), triethylamine (1.04 mL, 7.5 mmol), and 4-dimethylaminopyridine (DMAP, 61.1 mg, 0.5 mmol) in dichloromethane (25.0 mL). Alcohol (1.0 equiv., 5.0 mmol) was then added at 0 °C, and the reaction mixture was stirred overnight at room temperature. The resulting mixture was diluted with DCM (50.0 mL), and washed successively by saturated aqueous NaHCO<sub>3</sub>, and brine. The organic layer was dried over anhydrous Na<sub>2</sub>SO<sub>4</sub> and evaporated in vacuo. Purification of the crude product by flash column chromatography using *n*-hexane/ethyl acetate = 10/1 (v/v) as the eluent afforded the desired substrate. **a21-a24**, **a56-a59** and **a61-a62** were prepared according to the above procedure.

### Synthesis of **a12** <sup>18f</sup>:

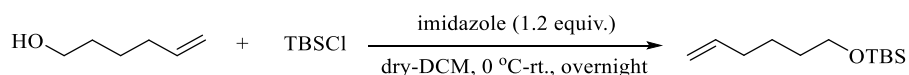

To a dry round bottom flask containing a magnetic stir bar were added 5-Hexen-1-ol (400 mg, 4 mmol), imidazole (326 mg, 4.8 mmol), and dry DCM (1.0 mL), then TBSCl (720 mg, 4.8 mmol) in dry DCM (0.8 mL) was slowly added at 0 °C. The reaction was warmed to room temperature and stirred overnight, then sat. NH<sub>4</sub>Cl aq. was added and extracted with DCM. The combined organic layer was washed with brine, dried with Na<sub>2</sub>SO<sub>4</sub>, filtered, and concentrated. The crude product was purified by

silica gel chromatography using *n*-hexane/ethyl acetate = 20/1 (v/v) as the eluent to give **a12** (700 mg, 82%) as a colorless oil.

**Synthesis of a18** <sup>[9]</sup>:

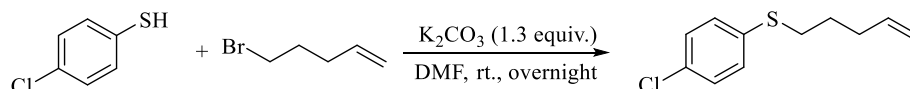

To a solution of 4-chlorothiophenol (432 mg, 3.0 mmol) in DMF (6.5 mL) was added  $K_2CO_3$  (539 mg, 3.9 mmol), followed by the 5-bromo-1-pentene (447 mg, 3 mmol). The reaction was stirred at room temperature overnight and then diluted with water. The combined hexane extracts were dried with  $Na_2SO_4$  and the solvent was removed under reduced pressure. The oily residue was purified by flash chromatography on silica gel (*n*-hexane/ethyl acetate = 100/1 (v/v)). The oily precipitate was dried in vacuo to afford the desired **a18** (564 mg, 89%) as a colorless oil.

**Synthesis of a19** <sup>[8]</sup>:

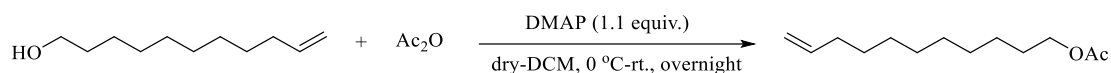

To a solution of undec-10-en-1-ol (510 mg, 3 mmol) in dry DCM (3 mL) were added DMAP (402 mg, 3.30 mmol) and  $Ac_2O$  (314  $\mu$ L, 3.3 mmol) at 0 °C, then the reaction was warmed to room temperature. After stirring overnight, sat.  $NH_4Cl$  aq. was added and extracted with DCM. The combined organic layer was washed with brine, dried with  $Na_2SO_4$ , filtered, and concentrated. The crude product was purified by silica gel chromatography using *n*-hexane/ethyl acetate = 40/1 (v/v) to give **a19** (572 mg, 90%) as a yellow oil.

**Synthesis of a20** <sup>[10]</sup>:

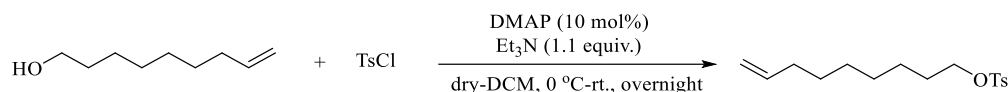

An oven-dried 100 mL round-bottom-flask equipped with a Teflon-coated magnetic stir bar was charged with 8-Nonen-1-ol (468 mg, 3.0 mmol) and DMAP (37 mg, 0.3 mmol). The flask was sealed with a rubber septum. The flask was then briefly evacuated and backfilled with nitrogen. Anhydrous DCM (5 mL) and triethylamine (0.45 mL, 3.3 mmol, 1.1 equiv.) were added to the flask via syringe. The solution was cooled to 0 °C before a solution of  $TsCl$  (627 mg, 3.3 mmol) in 3.0 mL DCM was added. The mixture was stirred at 0 °C for 2 h, then quenched with saturated aq.  $NH_4Cl$  (30 mL) and extracted with DCM (3 x 20 mL). The combined organic phases were washed with brine, dried over  $Na_2SO_4$  and

concentrated in vacuo. Purification by column chromatography using *n*-hexane/ethyl acetate = 30/1 (v/v) to afforded **a20** (0.78 g, 86% yield) as a colorless oil.

**Method E <sup>[11]</sup>:**

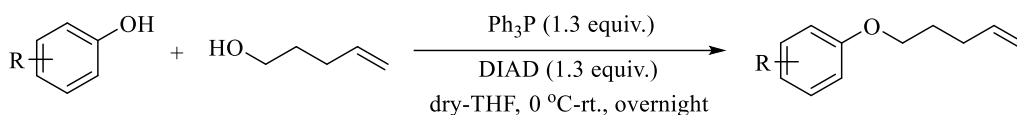

An oven-dried flask was charged with pent-4-en-1-ol (1.0 equiv.), triphenylphosphine (1.3 equiv.), phenol (1.3 equiv.), 15 mL of dry THF, and a magnetic stir bar. The solution was cooled to 0 °C, and diisopropyl azodicarboxylate (DIAD) (1.3 equiv.) was added dropwise. The resulting mixture was warmed to rt. After stirring for 24 h, the reaction was concentrated in vacuo. The crude material was purified by flash column chromatography or preparative TLC to yield pure ether. **a14-a15**, **a17** and **a63** were prepared according to the above procedure. (Note: **a17** used hex-5-en-1-ol as a start material. **a63** used 3-Buten-1-ol as a start material.)

**Synthesis of a16 <sup>[12]</sup>:**

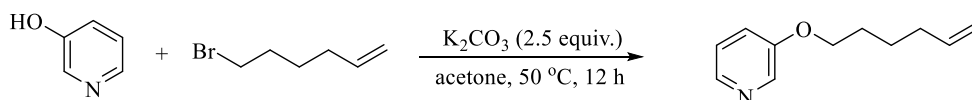

A mixture of 3-pyridinol (475 mg, 5.0 mmol), 6-bromo-1-pentene (896 mg, 5.5 mmol), acetone (30 mL), and anhydrous potassium carbonate (1.7 g, 12.5 mmol) was stirred at 50 °C for 12 h. After cooled to room temperature, the reaction mixture was poured into water (100 mL), and most portion of acetone (ca. 90%) was carefully removed under reduced pressure. Dichloromethane (20 mL) was added to the residue, and then washed with water and brine, dried over anhydrous Na<sub>2</sub>SO<sub>4</sub> and concentrated. The residue was purified by flash chromatography on silica gel with *n*-hexane/ethyl acetate (10:1) as eluent to afford **a16** (354 mg, 40% yield) as brown liquid.

**Synthesis of a26 <sup>[13]</sup>:**

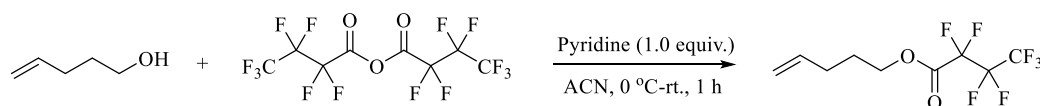

In an oven-dried round-bottom flask equipped with a PTFE-coated stirring bar, 4-penten-1-ol (430 mg, 5.0 mmol), pyridine (395 mg, 5.0 mmol), and 5 mL of acetonitrile were added, followed by stirring in an ice bath. heptafluorobutyric anhydride (2.05 g, 5.0 mmol) was added dropwise to the obtained solution. The reaction solution obtained by stirring the solution for 1 hour at room temperature was added to 30 mL of saturated aqueous sodium bicarbonate, followed by extraction by using 50 mL of ethyl

acetate. Then, the organic phase was washed with 30 mL of saturated brine, thereafter dehydrated using magnesium sulfate and filtered. The filtrate was distilled off under reduced pressure and the residue was purified by flash column chromatography on silica with *n*-hexane/ethyl acetate (50:1), affording **a26** (253 mg, 18%) as a yellow oil.

**Synthesis of a27<sup>[14]</sup>:**

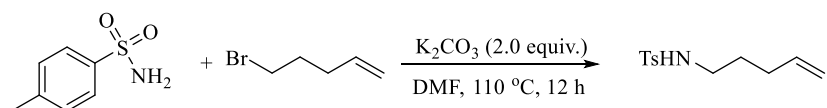

To a round-bottomed flask equipped with a stirring bar was charged with *p*-toluenesulfonamide (1.02 g, 6 mmol), K<sub>2</sub>CO<sub>3</sub> (1.38 g, 10 mmol) and dry DMF (15 mL). 5-Bromo-1-pentene (745 mg, 5 mmol) was slowly added and heated to 110 °C. The reaction was monitored by TLC. Upon completion, the reaction mixture was cooled to room temperature and added water and extracted with ethyl acetate. The combined organic layers were washed by brine and then dried over anhydrous Na<sub>2</sub>SO<sub>4</sub>, filtered, concentrated and eventually purified silica gel column chromatography with *n*-hexane/ethyl acetate (10:1) to give the desired compounds **a27** (877 mg, 73%).

**Synthesis of a29<sup>[15]</sup>:**

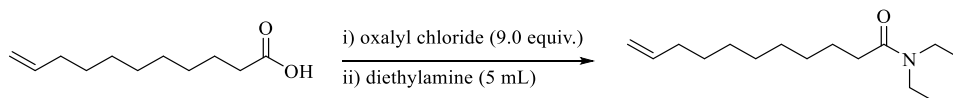

A solution of undec-10-enoic acid (1.84 g, 10 mmol) and oxalyl chloride (11.7 g, 93 mmol) in dry 50 mL THF was stirred at 0 °C for 2 h. Removal of the excess oxalyl chloride with evaporation in vacuo to give a residue which was re-dissolved in 10 mL dry THF. The resulting solution was then added in one pot to a solution of 5 mL diethylamine in 25 mL THF at 0 °C. After stirring for 2 h, to the solution was added with 150 mL water. The mixture was then extracted with 3×50 mL Et<sub>2</sub>O. The extracts were combined and washed with 5 % 50 mL HCl and 50 mL water. The organic layer was dried over MgSO<sub>4</sub>. Removal of the solvent in vacuo afforded a residue which was purified by flash column chromatography with *n*-hexane/ethyl acetate (20:1) to afford **a29** (1.1 g, 46%) as white solid.

**Synthesis of a30<sup>[16]</sup>:**

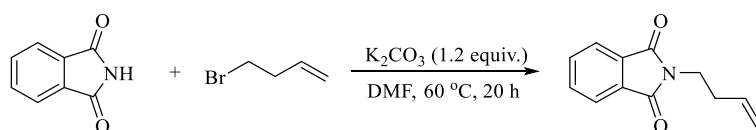

In an oven-dried round-bottom flask equipped with a PTFE-coated stirring bar, phthalimide (1.47 g, 10.0 mmol) and  $K_2CO_3$  (1.66 g, 12.0 mmol) were suspended in DMF (20 mL), then 4-bromobut-1-ene (1.48 g, 11.0 mmol) was added in one portion, then the reaction was stirred at 60 °C for 20 h. After cooling down to room temperature, the reaction was diluted with water (50 mL) and extracted twice with EtOAc (50 mL each time). The combined organic extracts were washed twice with water (80 mL each time) and once with brine (80 mL), then were dried over  $MgSO_4$  and the solvent was removed in vacuo. The residue was purified by flash column chromatography on silica with *n*-hexane/ethyl acetate (15:1), affording **a30** (1.45 g, 72%) as a white solid.

**Synthesis of a31** <sup>[16]</sup>:

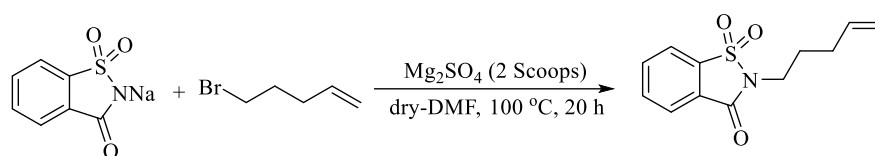

In an oven-dried Schlenk tube equipped with a PTFE-coated stirring bar, sodium saccharin dihydrate (1.2 g, 5.0 mmol),  $MgSO_4$  (two scoops), dry DMF (20 mL) and 1-bromopentene (0.9 mL, 7.5 mmol) were charged and stirred at 100 °C for 20 h, then the reaction was warmed to room temperature and diluted with water (50 mL). The aqueous layer was extracted twice with EtOAc (30 mL each time), then the combined organic extracts were washed three times with water (30 mL each time), then dried over  $MgSO_4$  and the solvent was removed in vacuo. The crude product was purified by flash column chromatography on silica with *n*-hexane/ethyl acetate 9:1 to 7:1, affording **a31** (1.15 g, 92% yield) as a colorless thick gum.

**Synthesis of a32** <sup>[16]</sup>:

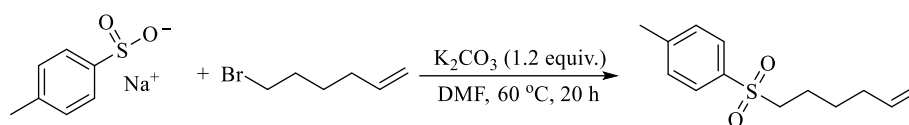

In an oven-dried round-bottom flask equipped with a PTFE-coated stirring bar, sodium *p*-toluenesulfonate (1.78 g, 10.0 mmol) and  $K_2CO_3$  (1.66 g, 12.0 mmol) were suspended in DMF (20 mL), then 6-bromohex-1-ene (1.49 mL, 11.0 mmol) was added in one portion, then the reaction was stirred at 60 °C for 20 h. After cooling down to room temperature, the reaction was diluted with water (50 mL) and extracted twice with EtOAc (50 mL each time). The combined organic extracts were washed twice with water (80 mL each time) and once with brine (80 mL), then were dried over  $MgSO_4$  and the solvent was removed in vacuo. The residue was purified by flash column chromatography on silica with *n*-hexane/ethyl acetate (15:1), affording **a32** (1.74 g, 73%) as a colorless oil.

---

**Synthesis of a33 [17]:**

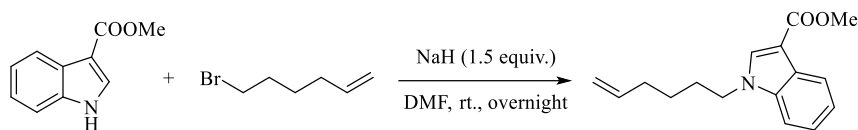

A solution of methyl indole-3-carboxylate (0.53 g, 3.0 mmol) in anhydrous DMF (10.0 mL) was treated with sodium hydride (0.18 g, 4.5 mmol) and 6-bromohex-1-ene (0.45 mL, 3.3 mmol). The reaction mixture was stirred for overnight and quenched with a solution of saturated aq.  $\text{NH}_4\text{Cl}$  (10 mL) and diluted with ethyl acetate (10 mL). The mixture was then extracted with EtOAc (2 x 10 mL), washed with brine, dried over  $\text{Na}_2\text{SO}_4$ , and concentrated to give a crude mixture. Purification by flash chromatography (20% EtOAc in *n*-hexanes) afforded the **a33** (579 mg, 75%) as green oil.

**Synthesis of a60 [11]:**

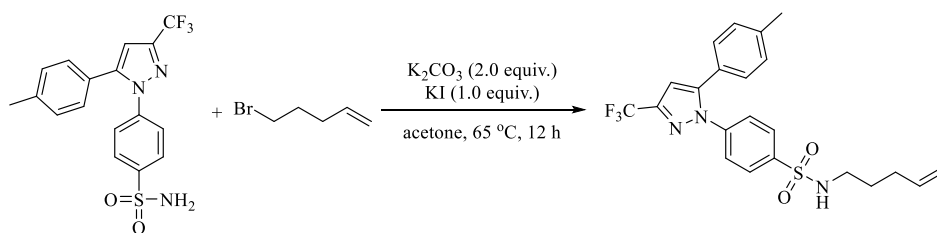

An oven-dried 20-mL vial was charged with 5-bromopent-1-ene (0.67 g, 4.5 mmol), Celecoxib (1.0 g, 3.0 mmol), potassium carbonate (0.83 g, 6.0 mmol), potassium iodide (0.50 g, 3.0 mmol), 7.5 mL of dry acetone, and a magnetic stir bar. The reaction was heated at 65 °C for 12 h and filtered. The product was purified by flash column chromatography (15% EtOAc in *n*-hexanes) to afford the corresponding compound **a60** (676 mg, 52%) as a white solid.



### 2.3) Optimization of the amount of silane and TBHP. <sup>a</sup>

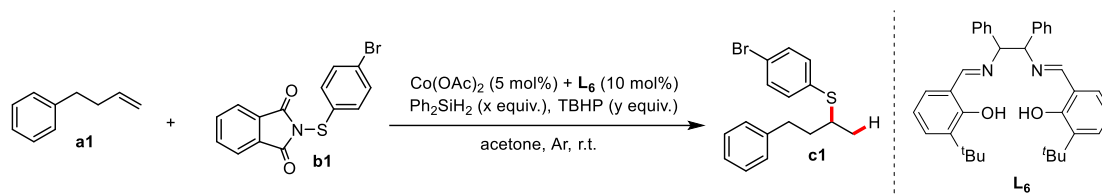

| Entry | $\text{Ph}_2\text{SiH}_2$ (x equiv.) | TBHP (y equiv.) | <b>c1</b> (%) <sup>b</sup> |
|-------|--------------------------------------|-----------------|----------------------------|
| 1     | 1.0                                  | 1.5             | 22                         |
| 2     | 1.0                                  | 2.0             | 28                         |
| 3     | 1.5                                  | 1.5             | 45                         |
| 4     | 2.0                                  | 1.0             | 33                         |
| 5     | 2.0                                  | 1.5             | 75                         |
| 6     | 2.0                                  | 2.0             | 36                         |

<sup>a</sup> **a1** (0.3 mmol, 1.5 equiv.), **b1** (0.2 mmol, 1.0 equiv.),  $\text{Co}(\text{OAc})_2$  (5 mol %),  $\text{L}_6$  (10 mol%),  $\text{Ph}_2\text{SiH}_2$  (x equiv.) and TBHP (y equiv.) in acetone (3.0 mL). <sup>b</sup> Isolated yield.

---

#### 2.4) General procedure for Co-catalyzed Markovnikov hydrothiolation reaction.

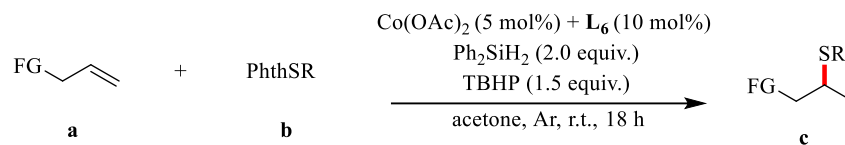

To a solution of **a** (0.30 mmol, 1.5 equiv.), **b** (0.20 mmol, 1.0 equiv.),  $\text{Co}(\text{OAc})_2$  (2 mg, 5.0 mol%) and  $\text{L}_6$  (4 mg, 10.0 mol%) in acetone (3.0 mL) was added  $\text{Ph}_2\text{SiH}_2$  (73 mg, 2.0 equiv.) and *tert*-butyl hydroperoxide (24 mg, 1.5 equiv.) successively under argon atmosphere in a sealed tube. The resulting mixture was stirred at room temperature. After reaction finished, the reaction mixture was concentrated under reduced pressure. The residue was purified on a silica gel column to afford the products.

## 2.5) Gram-scale synthesis.

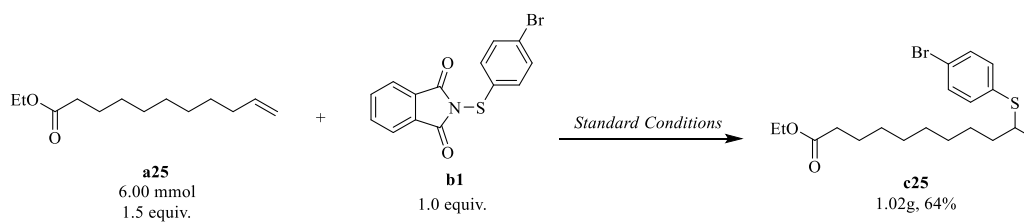

To a solution of **a25** (1.27 g, 6.00 mmol, 1.5 equiv.), **b1** (1.28 g, 4.00 mmol, 1.0 equiv.),  $\text{Co}(\text{OAc})_2$  (35 mg, 5.0 mol%) and **L6** (85 mg, 10.0 mol%) in acetone (20.0 mL) was added  $\text{Ph}_2\text{SiH}_2$  (1.48 mL, 2.0 equiv.) and *tert*-butyl hydroperoxide (0.60 mL, 1.5 equiv.) successively under an argon atmosphere in a sealed tube. The resulting mixture was stirred at room temperature. After reaction finish, the reaction mixture was concentrated under reduced pressure. The residue was purified on a silica gel column (*n*-hexane/ethyl acetate = 50:1, v/v) to afford the products as orange oil (1.02 g, 64%).

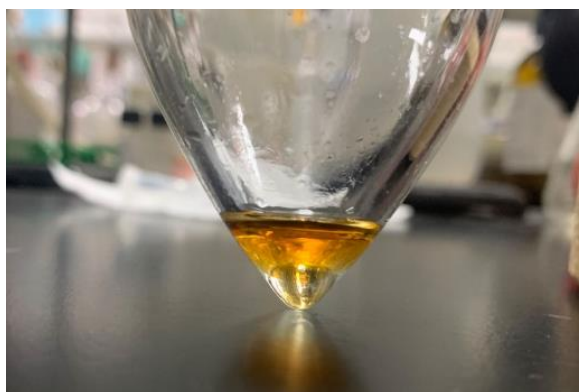

## 2.6) Synthetic applications.

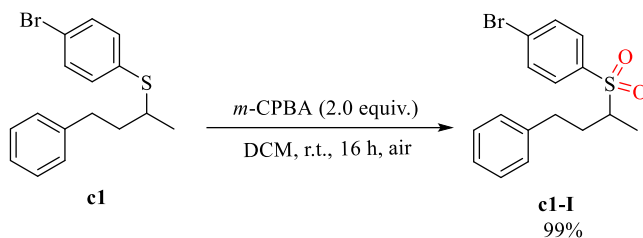

To a stirred solution of **c1** (64 mg, 0.2 mmol) in DCM (3 mL) was added, dropwise over 15 min, a solution of *m*-CPBA (103 mg, 0.6 mmol) in DCM (1 mL). The reaction mixture was stirred for 16 h, washed with saturated NaHCO<sub>3</sub> solution (3 x 30 mL) and water (30 mL), dried with MgSO<sub>4</sub> and concentrated under reduced pressure to yield the crude product as a white solid [18]. The residue was purified on a silica gel column (*n*-hexane/ethyl acetate = 10:1, v/v) to afford the **c1-I** as white solid (69 mg, 99%).

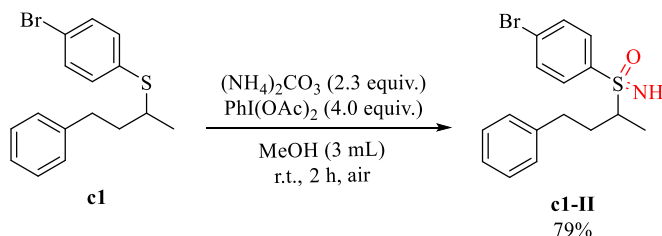

To a solution of **c1** (64 mg, 0.2 mmol) in MeOH (3 mL) was added (NH<sub>4</sub>)<sub>2</sub>CO<sub>3</sub> (44 mg, 0.46 mmol) and PhI(OAc)<sub>2</sub> (257 mg, 0.8 mmol) under air atmosphere in a sealed tube. The resulting mixture was stirred at room temperature. After reaction finished, the reaction mixture was concentrated under reduced pressure [19]. The residue was purified on a silica gel column (*n*-hexane/ethyl acetate = 10:1, v/v) to afford the **c1-II** as white solid (55 mg, 79%).

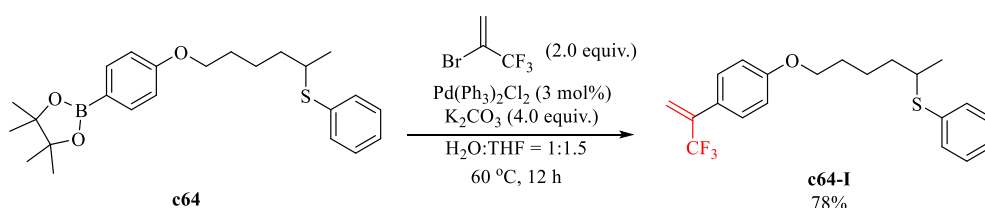

Product **c64** (123 mg, 0.3 mmol), Pd(PPh<sub>3</sub>)<sub>2</sub>Cl<sub>2</sub> (7 mg, 0.009 mmol), K<sub>2</sub>CO<sub>3</sub> (165 mg, 1.2 mmol) were dissolved in THF (0.9 mL) and H<sub>2</sub>O (0.6 mL) in a two-neck flask under argon atmosphere. Then, 2-bromo-3,3,3-trifluoroprop-1-ene (65 μL, 0.6 mmol) was added dropwise into the mixture. The mixture was heated to 60 °C in an oil bath for at least 12 h. Then the mixed solution was extracted with ethyl acetate (3 x 15.0 mL). The organic layer was washed with brine (20.0 mL), dried over Na<sub>2</sub>SO<sub>4</sub>, and then concentrated under reduced pressure [5]. The residue was purified on a silica gel column (*n*-hexane/ethyl acetate = 60:1, v/v) to afford the **c64-I** as yellow oil (87 mg, 78%).

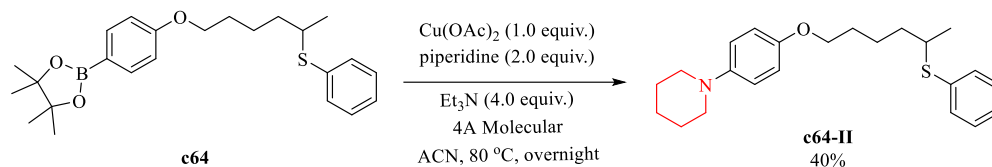

In a 10 mL dried pyrex screw-top reaction tube (borosilicate glass), product **c64** (123 mg, 0.3 mmol), piperidine (51 mg, 0.6 mmol),  $\text{Cu(OAc)}_2$  (55 mg, 0.3 mmol),  $\text{Et}_3\text{N}$  (0.17 mL, 1.2 mmol) and 50 mg 4A molecular sieves were added into  $\text{CH}_3\text{CN}$  (3 mL), the reaction mixture was degassed under argon by sparging for 5 min, then put the tube in 80 °C oil bath overnight. When the reaction finished, the reaction mixture was allowed to cool to room temperature and filtered through a short pad of celite, washed with  $\text{EtOAc}$  (2 mL x 3) <sup>[20]</sup>. The residue was purified on a silica gel column (*n*-hexane/ethyl acetate = 20:1, v/v) to afford the **c64-II** as brown oil (30 mg, 40%).

## 2.7) Crystal structure determination of **c10**, **c34**, **c37** and **c38**.

A suitable crystal of **c10** was mounted with glue at the end of a glass fiber. Data collection for **c10** was performed on a Rigaku OD (Enhance Cu X-ray Source,  $K\alpha$ ,  $\lambda = 1.54184 \text{ \AA}$ ) with CCD Plate (XtaLAB Pro: Kappa single) under 150 K. Data were processed with the CrysAlisPro 1.171.39.28b (Rigaku Oxford Diffraction, 2015).

Structure was solved by ShelXT<sup>6</sup> in Olex2 1.5<sup>7</sup> and refined on  $F^2$  using full-matrix least-squares (SHELXL-2018 in Olex2 1.5). Anisotropic thermal parameters were applied to all non-hydrogen atoms. The hydrogen atoms were generated geometrically. Crystal data and structure refinement parameters are summarized in **Table S1**. CCDC No. 2281719

Single crystals of **c10** were prepared in acetonitrile solution of **c10**. Colourless block crystals formed.

**Table S1.** The X-ray crystallography analysis of compound **c10**

| Compound               | <b>c10</b>              |
|------------------------|-------------------------|
| Empirical formula      | $C_{29}H_{39}BrS$       |
| Formula weight         | 499.57                  |
| Crystal system         | Monoclinic              |
| Space group            | $C2/c$                  |
| $a$ (Å)                | 22.1141(6)              |
| $b$ (Å)                | 5.2760(2)               |
| $c$ (Å)                | 45.0011(15)             |
| $\alpha$ (°)           | 90                      |
| $\beta$ (°)            | 95.564(3)               |
| $\gamma$ (°)           | 90                      |
| $V$ (Å <sup>3</sup> )  | 5225.7(3)               |
| $Z$                    | 8                       |
| Temperature (K)        | 150(2)                  |
| Density (calculated)   | 1.270 g/cm <sup>3</sup> |
| Absorption coefficient | 2.970 mm <sup>-1</sup>  |

|                                                     |                                        |
|-----------------------------------------------------|----------------------------------------|
| $F(000)$                                            | 2112                                   |
| Crystal size                                        | 0.20 × 0.05 × 0.02 mm <sup>3</sup>     |
| Theta range for data collection                     | 3.948 to 71.356 °                      |
| Index ranges                                        | -26 ≤ h ≤ 25, -6 ≤ k ≤ 3, -55 ≤ l ≤ 51 |
| Reflections collected                               | 9862                                   |
| Independent reflections                             | 4815 [ $R_{int} = 0.0357$ ]            |
| Completeness                                        | 97.7% to theta = 67.684 °              |
| Data / restraints / parameters                      | 4815 / 0 / 291                         |
| Goodness-of-fit on $F^2$                            | 1.054                                  |
| Final $R$ indices [ $I > 2\sigma(I)$ ] <sup>a</sup> | $R_1 = 0.0757$<br>$wR_2 = 0.2051$      |
| $R$ indices (all data) <sup>a</sup>                 | $R_1 = 0.0834$<br>$wR_2 = 0.2113$      |
| Extinction coefficient                              | N/A                                    |
| Absolute structure parameter                        | N/A                                    |
| Largest diff. peak and hole                         | 1.052 and -0.582 e.Å <sup>-3</sup>     |

<sup>a</sup>  $R_1 = \Sigma ||F_o| - |F_c|| / \Sigma |F_o|$ ;  $wR_2 = \{[\Sigma w(F_o^2 - F_c^2)^2] / \Sigma [w(F_o^2)]\}^{1/2}$ ;  $w = 1 / [\sigma^2(F_o^2) + (aP)^2 + bP]$ , where  $P = [\max(F_o^2, 0) + 2F_c^2] / 3$  for all data.

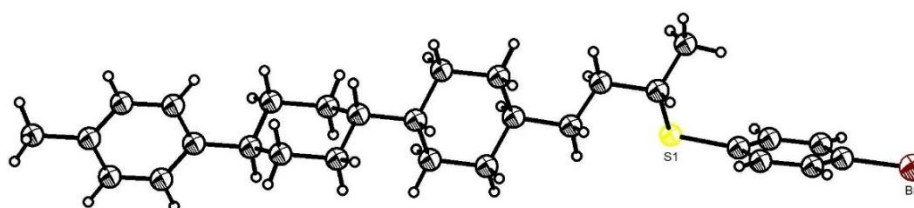

**Figure S1.** Molecular structure of **c10** with 50% thermal ellipsoid.

CCDC Number: 2281719

A suitable crystal of **c34** was mounted with glue at the end of a glass fiber. Data collection for **c34** was performed on a Rigaku OD (Enhance Cu X-ray Source,  $K\alpha$ ,  $\lambda = 1.54184 \text{ \AA}$ ) with CCD Plate (XtaLAB Pro: Kappa single) under 298 K. Data were processed with the CrysAlisPro 1.171.39.28b (Rigaku Oxford Diffraction, 2015).

Structure was solved by ShelXT<sup>6</sup> in Olex2 1.5<sup>7</sup> and refined on  $F^2$  using full-matrix least-squares (SHELXL-2018 in Olex2 1.5). Anisotropic thermal parameters were applied to all non-hydrogen atoms. The hydrogen atoms were generated geometrically. Crystal data and structure refinement parameters are summarized in **Table S2**. CCDC No. 2281720

Single crystals of **c34** were prepared in acetonitrile solution of **c34**.

**Table S2. The X-ray crystallography analysis of compound c34**

| Compound               | <b>c34</b>              |
|------------------------|-------------------------|
| Empirical formula      | $C_{15}H_{20}BrNO_2S$   |
| Formula weight         | 358.29                  |
| Crystal system         | Triclinic               |
| Space group            | $P-1$                   |
| $a$ (Å)                | 6.0887(5)               |
| $b$ (Å)                | 10.8043(10)             |
| $c$ (Å)                | 13.1121(11)             |
| $\alpha$ (°)           | 80.047(7)               |
| $\beta$ (°)            | 88.378(7)               |
| $\gamma$ (°)           | 79.464(7)               |
| $V$ (Å <sup>3</sup> )  | 835.26(13)              |
| $Z$                    | 2                       |
| Temperature (K)        | 298(2)                  |
| Density (calculated)   | 1.425 g/cm <sup>3</sup> |
| Absorption coefficient | 4.529 mm <sup>-1</sup>  |
| $F(000)$               | 368                     |



|                                                     |                                        |
|-----------------------------------------------------|----------------------------------------|
| Crystal size                                        | 0.55 × 0.08 × 0.05 mm <sup>3</sup>     |
| Theta range for data collection                     | 3.422 to 68.242 °                      |
| Index ranges                                        | -7 ≤ h ≤ 6, -13 ≤ k ≤ 12, -15 ≤ l ≤ 15 |
| Reflections collected                               | 6744                                   |
| Independent reflections                             | 2990 [ $R_{int} = 0.0400$ ]            |
| Completeness                                        | 97.9 % to theta = 67.684 °             |
| Data / restraints / parameters                      | 2990 / 0 / 185                         |
| Goodness-of-fit on $F^2$                            | 1.073                                  |
| Final $R$ indices [ $I > 2\sigma(I)$ ] <sup>a</sup> | $R_1 = 0.0465$<br>$wR_2 = 0.1309$      |
| $R$ indices (all data) <sup>a</sup>                 | $R_1 = 0.0524$<br>$wR_2 = 0.1357$      |
| Extinction coefficient                              | N/A                                    |
| Absolute structure parameter                        | N/A                                    |
| Largest diff. peak and hole                         | 0.672 and -0.641 e.Å <sup>-3</sup>     |

<sup>a</sup>  $R_1 = \frac{\sum ||F_o| - |F_c||}{\sum |F_o|}$ ;  $wR_2 = \left\{ \frac{\sum w(F_o^2 - F_c^2)^2}{\sum [w(F_o^2)]} \right\}^{1/2}$ ;  $w = 1 / [\sigma^2(F_o^2) + (aP)^2 + bP]$ , where  $P = [\max(F_o^2, 0) + 2F_c^2]/3$  for all data.

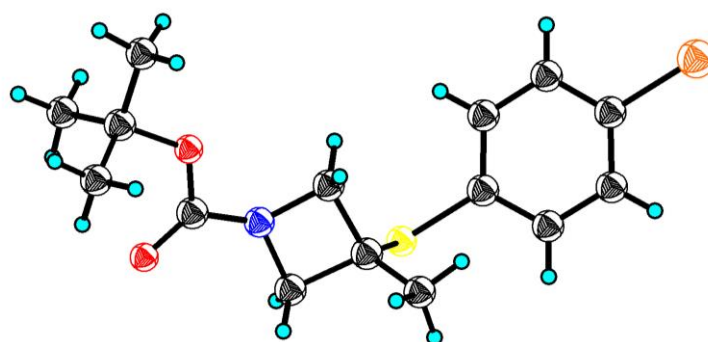

**Figure S2.** Molecular structure of **c34** with 50% thermal ellipsoid.

**CCDC Number:** 2281720

A suitable crystal of **c37** was mounted with glue at the end of a glass fiber. Data collection for **c37** was performed on a Rigaku OD (Enhance Cu X-ray Source,  $K\alpha$ ,  $\lambda = 1.54184 \text{ \AA}$ ) with CCD Plate (XtaLAB Pro: Kappa single) under 150 K. Data were processed with the CrysAlisPro 1.171.39.28b (Rigaku Oxford Diffraction, 2015).

Structure was solved by ShelXT<sup>6</sup> in Olex2 1.5<sup>7</sup> and refined on  $F^2$  using full-matrix least-squares (SHELXL-2018 in Olex2 1.5). Anisotropic thermal parameters were applied to all non-hydrogen atoms. The hydrogen atoms were generated geometrically. Crystal data and structure refinement parameters are summarized in **Table S3**. CCDC No. 2281781

Single crystals of **c37** were prepared in acetonitrile solution of **c37**.

**Table S3. The X-ray crystallography analysis of compound c37**

| Compound               | <b>c37</b>                         |
|------------------------|------------------------------------|
| Empirical formula      | $C_{19}H_{21}BrS$                  |
| Formula weight         | 361.33                             |
| Crystal system         | Orthorhombic                       |
| Space group            | $Pna2_1$                           |
| $a$ (Å)                | 9.09912(15)                        |
| $b$ (Å)                | 9.97277(13)                        |
| $c$ (Å)                | 37.5925(4)                         |
| $\alpha$ (°)           | 90                                 |
| $\beta$ (°)            | 90                                 |
| $\gamma$ (°)           | 90                                 |
| $V$ (Å <sup>3</sup> )  | 3411.27(8)                         |
| $Z$                    | 8                                  |
| Temperature (K)        | 150(2)                             |
| Density (calculated)   | 1.407 g/cm <sup>3</sup>            |
| Absorption coefficient | 4.337 mm <sup>-1</sup>             |
| $F(000)$               | 1488                               |
| Crystal size           | 0.35 × 0.15 × 0.01 mm <sup>3</sup> |

|                                                     |                                    |
|-----------------------------------------------------|------------------------------------|
| Theta range for data collection                     | 4.434 to 71.749 °                  |
| Index ranges                                        | -10<=h<=10, -11<=k<=12, -46<=l<=46 |
| Reflections collected                               | 37814                              |
| Independent reflections                             | 6516 [Rint = 0.0453]               |
| Completeness                                        | 100.0 % to theta = 67.684 °        |
| Data / restraints / parameters                      | 6516 / 1 / 381                     |
| Goodness-of-fit on $F^2$                            | 1.070                              |
| Final $R$ indices [ $I > 2\sigma(I)$ ] <sup>a</sup> | $R_1 = 0.0402$<br>$wR_2 = 0.0978$  |
| $R$ indices (all data) <sup>a</sup>                 | $R_1 = 0.0422$<br>$wR_2 = 0.0988$  |
| Extinction coefficient                              | N/A                                |
| Absolute structure parameter                        | -0.024(2)                          |
| Largest diff. peak and hole                         | 0.719 and -0.290 e.Å <sup>-3</sup> |

<sup>a</sup>  $R_1 = \Sigma||F_o| - |F_c||/\Sigma|F_o|$ ;  $wR_2 = \{[\Sigma w(F_o^2 - F_c^2)^2]/\Sigma[w(F_o^2)^2]\}^{1/2}$ ;  $w = 1/[\sigma^2(F_o^2) + (aP)^2 + bP]$ , where  $P = [\max(F_o^2, 0) + 2F_c^2]/3$  for all data.

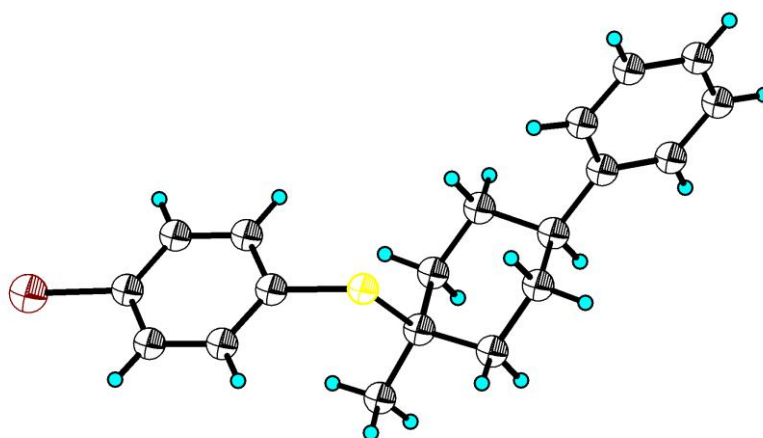

**Figure S3.** Molecular structure of **c37** with 50% thermal ellipsoid.

CCDC Number: 2281781

A suitable crystal of **c38** was mounted with glue at the end of a glass fiber. Data collection for **c38** was performed on a Rigaku OD (Enhance Cu X-ray Source,  $K\alpha$ ,  $\lambda = 1.54184 \text{ \AA}$ ) with CCD Plate (XtaLAB Pro: Kappa single) under 150 K. Data were processed with the CrysAlisPro 1.171.39.28b (Rigaku Oxford Diffraction, 2015).

Structure was solved by ShelXT<sup>6</sup> in Olex2 1.5<sup>7</sup> and refined on  $F^2$  using full-matrix least-squares (SHELXL-2018 in Olex2 1.5). Anisotropic thermal parameters were applied to all non-hydrogen atoms. The hydrogen atoms were generated geometrically. Crystal data and structure refinement parameters are summarized in **Table S4**. CCDC No. 2281721

Single crystals of **c38** were prepared in acetonitrile solution of **c38**.

**Table S4. The X-ray crystallography analysis of compound c38**

| Compound               | <b>c38</b>                         |
|------------------------|------------------------------------|
| Empirical formula      | $C_{17}H_{21}BrS$                  |
| Formula weight         | 337.31                             |
| Crystal system         | Orthorhombic                       |
| Space group            | $Pna2_1$                           |
| $a$ (Å)                | 11.19329(7)                        |
| $b$ (Å)                | 19.33429(12)                       |
| $c$ (Å)                | 6.77041(4)                         |
| $\alpha$ (°)           | 90                                 |
| $\beta$ (°)            | 90                                 |
| $\gamma$ (°)           | 90                                 |
| $V$ (Å <sup>3</sup> )  | 1465.214(16)                       |
| $Z$                    | 4                                  |
| Temperature (K)        | 150(2)                             |
| Density (calculated)   | 1.529 g/cm <sup>3</sup>            |
| Absorption coefficient | 4.999 mm <sup>-1</sup>             |
| $F(000)$               | 696                                |
| Crystal size           | 0.40 × 0.10 × 0.05 mm <sup>3</sup> |

|                                                     |                                    |
|-----------------------------------------------------|------------------------------------|
| Theta range for data collection                     | 4.565 to 71.048 °                  |
| Index ranges                                        | -13<=h<=13, -23<=k<=23, -6<=l<=8   |
| Reflections collected                               | 14601                              |
| Independent reflections                             | 2250 [ $R_{int} = 0.0283$ ]        |
| Completeness                                        | 99.7 % to theta = 67.684 °         |
| Data / restraints / parameters                      | 2250 / 1 / 174                     |
| Goodness-of-fit on $F^2$                            | 1.068                              |
| Final $R$ indices [ $I > 2\sigma(I)$ ] <sup>a</sup> | $R_1 = 0.0202$<br>$wR_2 = 0.0549$  |
| $R$ indices (all data) <sup>a</sup>                 | $R_1 = 0.0203$<br>$wR_2 = 0.0549$  |
| Extinction coefficient                              | N/A                                |
| Absolute structure parameter                        | 0.27(2)                            |
| Largest diff. peak and hole                         | 0.291 and -0.312 e.Å <sup>-3</sup> |

<sup>a</sup>  $R_1 = \Sigma||F_o| - |F_c||/\Sigma|F_o|$ ;  $wR_2 = \{[\Sigma w(F_o^2 - F_c^2)^2]/\Sigma[w(F_o^2)^2]\}^{1/2}$ ;  $w = 1/[\sigma^2(F_o^2) + (aP)^2 + bP]$ , where  $P = [\max(F_o^2, 0) + 2F_c^2]/3$  for all data.

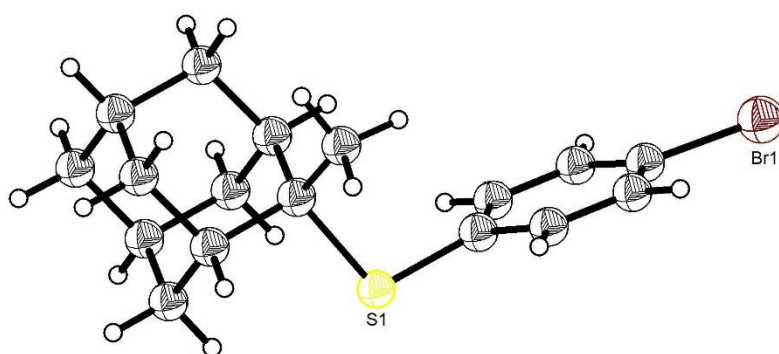

**Figure S4.** Molecular structure of **c38** with 50% thermal ellipsoid.

**CCDC Number:** 2281721

## 2.8) Deuterium labeling experiment.

**Preparation of Ph<sub>2</sub>SiD<sub>2</sub>** [21]: A three-necked flask equipped with a reflux condenser and a magnetic stir bar was flame-dried under reduced pressure, and then cooled under an Ar atmosphere. LiAlD<sub>4</sub> (0.42 g, 10.0 mmol.) and dry-Et<sub>2</sub>O (40 mL) was added successively under 0 °C, then followed by Ph<sub>2</sub>SiCl<sub>2</sub> (1.1 mL, 5.0 mmol.) dropwise over 2 min. The resulting mixture was refluxed for overnight. After the reaction was completed, the resulting suspension was filtered through celite and cooled to 0 °C. The filtrate was quenched by the dropwise addition of chilled H<sub>2</sub>O with vigorous stirring and extracted with Et<sub>2</sub>O. The combined organic layers were dried over anhydrous MgSO<sub>4</sub> and concentrated in vacuo under 0 °C to provide Ph<sub>2</sub>SiD<sub>2</sub> as a yellow oil with 83% deuterium incorporation. <sup>1</sup>H NMR (400 MHz, Chloroform-*d*) δ 7.68 – 7.61 (m, 4H), 7.50 – 7.37 (m, 6H), 3.52 (q, *J* = 7.0 Hz, 0.34H).

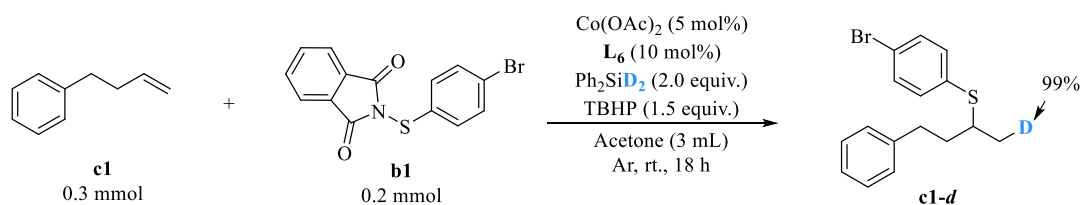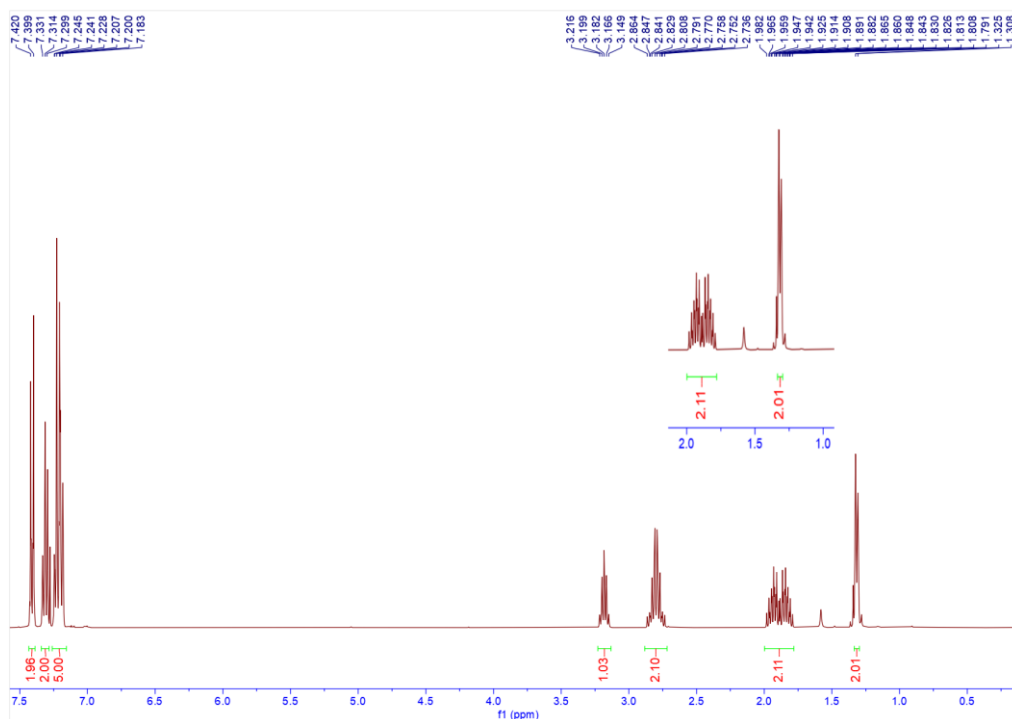

Figure S5. <sup>1</sup>H NMR spectra of **c1-d**

## 2.9) Radical trapping experiments.

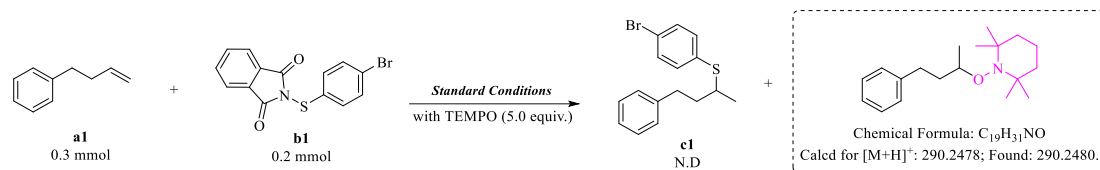

To a solution of alkene **a1** (45  $\mu$ L, 0.30 mmol.), N-S reagent **b1** (66mg, 0.20 mmol.),  $Co(OAc)_2$  (2 mg, 5.0 mol%) and **L6** (4 mg, 10.0 mol%) in acetone (3.0 mL) was added  $Ph_2SiH_2$  (73 mg, 0.4 mmol.), *tert*-butyl hydroperoxide (24 mg, 0.3 mmol.) and TEMPO (156 mg, 1.0 mmol.) successively under an argon atmosphere in a sealed tube. The resulting mixture was stirred at room temperature. After reaction finished, the reaction mixture was concentrated under reduced pressure.

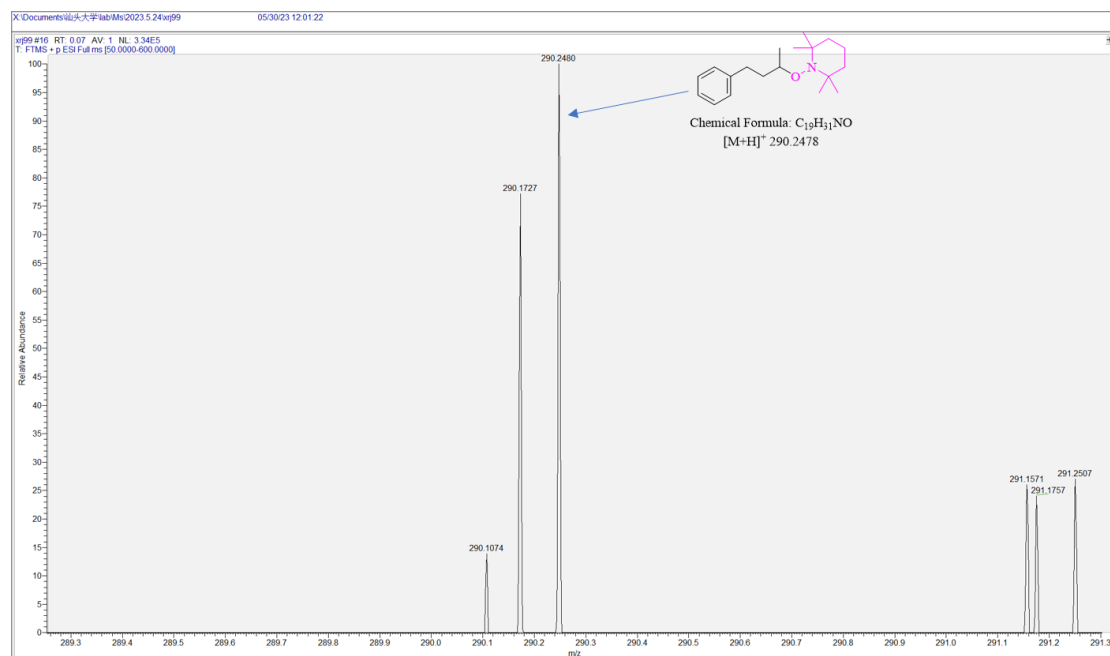

Figure S6. HRMS spectra of TEMPO-mediated reaction.

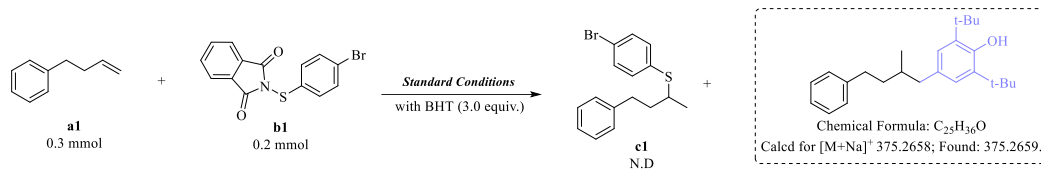

To a solution of alkene **a1** (45  $\mu\text{L}$ , 0.30 mmol.), N-S reagent **b1** (66mg, 0.20 mmol.),  $\text{Co}(\text{OAc})_2$  (2 mg, 5.0 mol%) and **L6** (4 mg, 10.0 mol%) in acetone (3.0 mL) was added  $\text{Ph}_2\text{SiH}_2$  (73 mg, 0.4 mmol.), *tert*-butyl hydroperoxide (24 mg, 0.3 mmol.) and BHT (132 mg, 0.6 mmol.) successively under an argon atmosphere in a sealed tube. The resulting mixture was stirred at room temperature. After reaction finished, the reaction mixture was concentrated under reduced pressure.

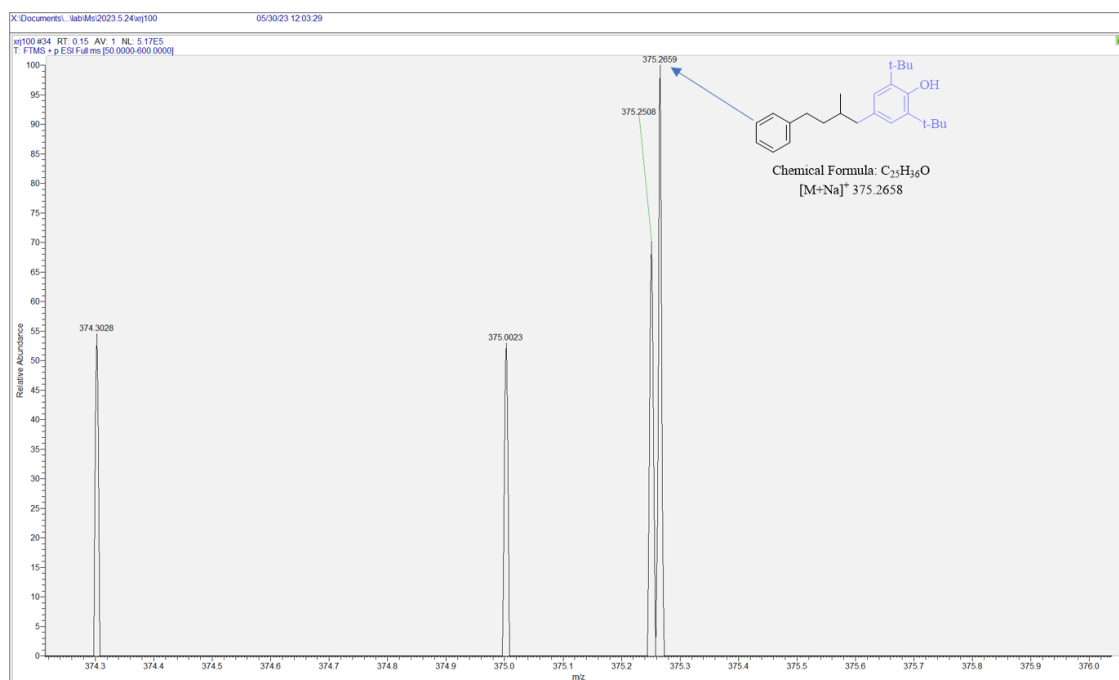

**Figure S7.** HRMS spectra of BHT-mediated reaction.



## 2.10) KIE experiment.

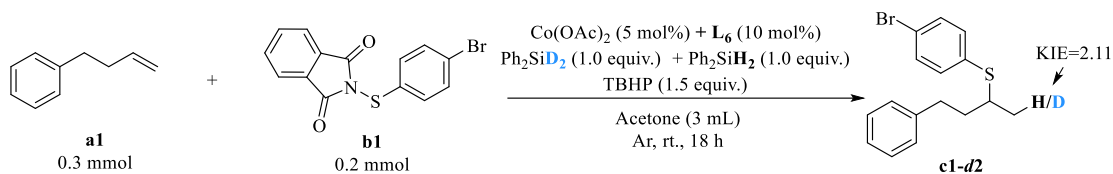

To a solution of **a1** (45  $\mu\text{L}$ , 0.30 mmol.), **b1** (66 mg, 0.2 mmol.),  $\text{Co}(\text{OAc})_2$  (2 mg, 5.0 mol%) and  $\text{L}_6$  (4 mg, 10.0 mol%) in acetone (3.0 mL) was added  $\text{Ph}_2\text{SiH}_2$  (34 mg, 0.2 mmol.),  $\text{Ph}_2\text{SiD}_2$  (34 mg, 0.2 mmol.) and *tert*-Butyl hydroperoxide (30  $\mu\text{L}$ , 0.15 mmol.) successively under an argon atmosphere in a sealed tube. The resulting mixture was stirred at room temperature. After reaction finish, the reaction mixture was concentrated under reduced pressure. The resulting crude product was purified by flash column chromatography on silica gel. The product **1-d2** was analyzed by  $^1\text{H}$  NMR spectroscopy.

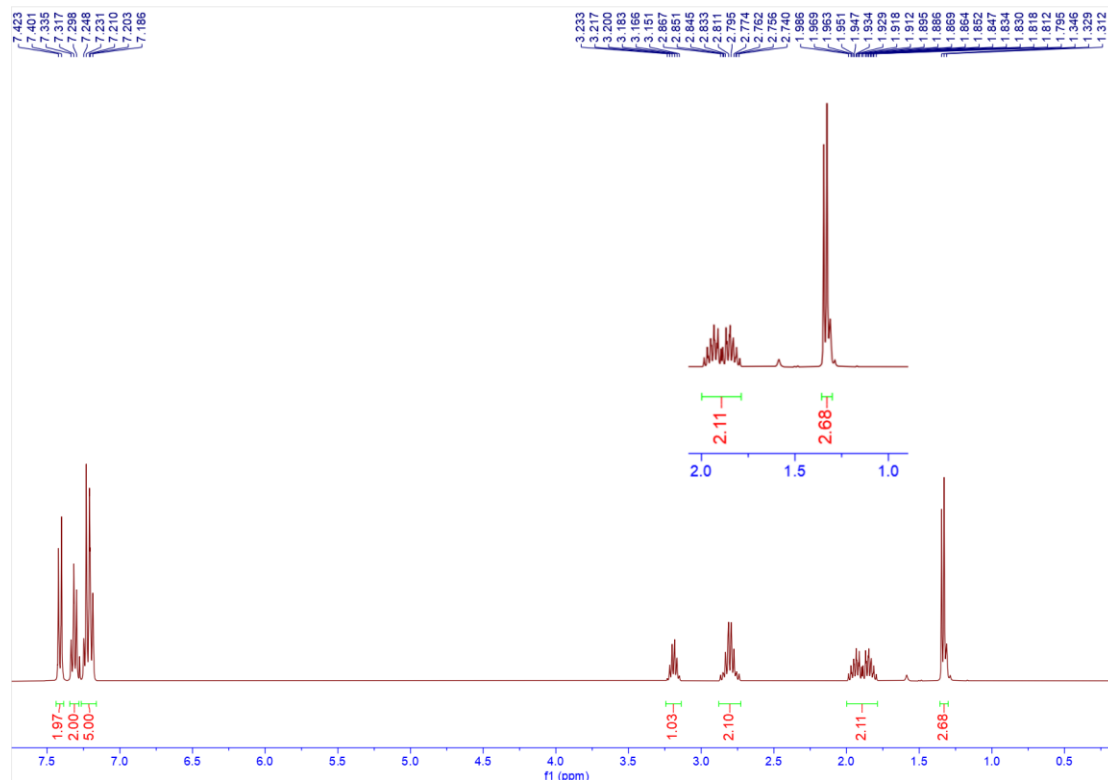

Figure S8.  $^1\text{H}$  NMR spectra of the **c1-d2**.

## 2.11) Competition experiment.

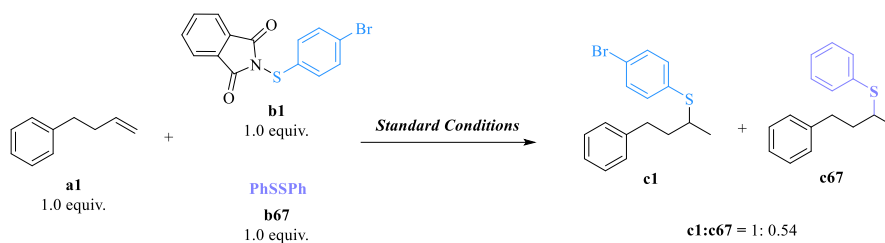

To a solution of **a1** (30  $\mu$ L, 0.20 mmol), **b1** (66 mg, 0.2 mmol), **b67** (44 mg, 0.2 mmol),  $\text{Co}(\text{OAc})_2$  (2 mg, 5.0 mol%) and **L6** (4 mg, 10.0 mol%) in acetone (3.0 mL) was added  $\text{Ph}_2\text{SiH}_2$  (74  $\mu$ L, 0.4 mmol) and *tert*-Butyl hydroperoxide (30  $\mu$ L, 0.15 mmol) successively under an argon atmosphere in a sealed tube. The resulting mixture was stirred at room temperature. After reaction finish, the reaction mixture was concentrated under reduced pressure. The resulting crude product was purified by flash column chromatography on silica gel. Ratio between the two products is determined by  $^1\text{H}$  NMR with BHT as an internal standard.

---

## 2.12) References.

- [1] Y. Yu, J. Chen, S. Meng, C. Li, M. Lan and Z. Zhang, Nickel(II) and Copper(II) Complexes as Catalysts for Norbornene Vinyl Polymerization Bearing Tetradentate  $\beta$ -Ketoiminato Ligands. *J. Mol. Catal. A: Chem.*, 2013, **380**, 104-111.
- [2] T. Fukuda and T. Katsuki, Highly Enantioselective Cyclopropanation of Styrene Derivatives Using Co(III)-Salen Complex as a Catalyst. *Tetrahedron*, 1997, **53**, 7201-7208.
- [3] L. Niu, J. Liu, H. Yi, S. Wang, X.-A. Liang, A. K. Singh, C.-W. Chiang and A. Lei, Visible-Light-Induced External Oxidant-Free Oxidative Phosphonylation of C(sp<sup>2</sup>)-H Bonds. *ACS Catal.*, 2017, **7**, 7412-7416.
- [4] G. N. Schrauzer, G. W. Parshall and E. R. Wonchoba, Bis(dimethylglyoximato)cobalt Complexes: ("Cobaloximes"). *Inorg. Synth.*, 1968, **11**, 61-70.
- [5] C.-M. Zhu, R.-B. Liang, Y. Xiao, W. Zhou, Q.-X. Tong and J.-J. Zhong, Metal-Free and Site-Selective  $\alpha$ -C-H Functionalization of Tetrahydrofuran Enabled by the Photocatalytic Generation of Bromine Radicals. *Green Chem.*, 2023, **25**, 960-965.
- [6] Q. Feng, Q. Wang and J. Zhu, Oxidative Rearrangement of 1,1-Disubstituted Alkenes to Ketones. *Science*, 2023, **379**, 1363-1368.
- [7] Y. Li, J. M. Bao, Y. Zhang, X. Peng, W. J. Yu, T. Wang, D. T. Yang, Q. Liu, Q. Zhang and J. K. Fu, Three-Component Aminofluorination of Alkenes with Electronically Rich Amino Sources. *Chem*, 2022, **8**, 1147-1163.
- [8] K. Yahata, Y. Kaneko and S. Akai, Cobalt-Catalyzed Intermolecular Markovnikov Hydroamination of Nonactivated Olefins:  $N^2$ -Selective Alkylation of Benzotriazole. *Org. Lett.*, 2020, **22**, 598-603.
- [9] M. Nakagawa, Y. Matsuki, K. Nagao and H. Ohmiya, A triple Photoredox/Cobalt/Brønsted Acid Catalysis Enabling Markovnikov Hydroalkoxylation of Unactivated Alkenes. *J. Am. Chem. Soc.*, 2022, **144**, 7953-7959.
- [10] F. Yang, Y.-C. Nie, H.-Y. Liu, L. Zhang, F. Mo and R. Zhu, Electrocatalytic Oxidative Hydrofunctionalization Reactions of Alkenes via Co(II/III/IV) Cycle. *ACS Catal.*, 2022, **12**, 2132-2137.
- [11] S. Ma, Y. Xi, H. Fan, S. Roediger and J. F. Hartwig, Enantioselective Hydroamination of Unactivated Terminal Alkenes. *Chem*, 2022, **8**, 532-542.
- [12] S.-M. Jia, Y.-H. Huang, Z.-L. Wang, F.-X. Fan, B.-H. Fan, H.-X. Sun, H. Wang and F. Wang, Hydroamination of Unactivated Alkenes with Aliphatic Azides. *J. Am. Chem. Soc.*, 2022, **144**, 16316-16324.
- [13] J. Itou, S. Yamaguchi, H. Takahashi, K. Yamamoto and F. Yoshino, Method for Forming Negative Pattern, Method for Producing Electronic Device, Electronic Device and Actinic Ray-Sensitive or Radiation-Sensitive Resin Composition. WO2013172466[P].

- 
- [14] Z.-H. Yan, W.-C. Li, Y.-H. Wu, Q.-B. Yan, Z.-L. Wei and W.-W. Liao, Electrochemical Cyclization of *N*-Cyanamide Alkenes with CF<sub>3</sub>SO<sub>2</sub>Na to Access C, N-(Bis)trifluoromethylated Cyclic Amidines and Related Compounds. *Org. Chem. Front.*, 2022, **9**, 5912-5920.
- [15] X. Wang, Y. Ye, S. Zhang, J. Feng, Y. Xu, Y. Zhang and J. Wang, Copper-Catalyzed C(sp<sup>3</sup>)-C(sp<sup>3</sup>) Bond Formation Using a Hypervalent Iodine Reagent: An Efficient Allylic Trifluoromethylation. *J. Am. Chem. Soc.*, 2011, **133**, 16410-16413.
- [16] G. Tan, M. Das, H. Keum, P. Bellotti, C. Daniliuc and F. Glorius, Photochemical Single-Step Synthesis of β-Amino Acid Derivatives from Alkenes and (Hetero)arenes. *Nat. Chem.*, 2022, **14**, 1174-1184.
- [17] P. Hu, B. K. Peters, C. A. Malapit, J. C. Vantourout, P. Wang, J. Li, L. Mele, P.-G. Echeverria, S. D. Minter and P. S. Baran, Electroreductive Olefin-Ketone Coupling. *J. Am. Chem. Soc.*, 2020, **142**, 20979-20986.
- [18] X.-S. Zhang, Y.-F. Zhang, Z.-W. Li, F.-X. Luo and Z.-J. Shi, Synthesis of Dibenzo[*c,e*]oxepin-5(7*H*)-ones from Benzyl Thioethers and Carboxylic Acids: Rhodium-Catalyzed Double C-H Activation Controlled by Different Directing Groups. *Angew. Chem., Int. Ed.*, 2015, **54**, 5478-5482.
- [19] X. Sun, X. Duan, N. Zheng and W. Song, Gold-Catalyzed *Anti*-Markovnikov Oxidation of Au-Allenylidene to Generate Alkylidene Ketene. *Org. Lett.*, 2023, **25**, 2798-2805.
- [20] J. Xie, K. Sekine, S. Witzel, P. Krämer, M. Rudolph, F. Rominger and A. S. K. Hashmi, Light-Induced Gold-Catalyzed Hiyama Arylation: A Coupling Access to Biarylboronates. *Angew. Chem., Int. Ed.*, 2018, **57**, 16648-16653.
- [21] W. Xiong, F. Shi, R. Cheng, B. Zhu, L. Wang, P. Chen, H. Lou, W. Wu, C. Qi, M. Lei and H. Jiang, Palladium-Catalyzed Highly Regioselective Hydrocarboxylation of Alkynes with Carbon Dioxide, *ACS Catal.*, 2020, **10**, 7968-7978.

### 3. Analytical data of target compounds.

#### (4-bromophenyl)(4-phenylbutan-2-yl)sulfane (c1)

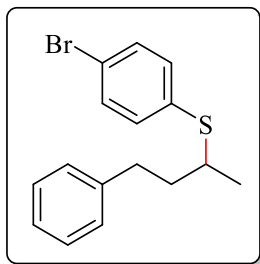

Purification by column chromatography on silica gel (*n*-hexane/ethyl acetate = 100:1, v/v) afforded the title compound as a colorless oil (48 mg, 75% yield).

<sup>1</sup>H NMR (400 MHz, Chloroform-*d*) δ 7.42 (d, *J* = 8.4 Hz, 2H), 7.32 (t, *J* = 7.4 Hz, 2H), 7.26 – 7.17 (m, 4H), 3.20 (h, *J* = 6.7 Hz, 1H), 2.90 – 2.71 (m, 2H), 2.02 – 1.78 (m, 2H), 1.34 (d, *J* = 6.7 Hz, 3H).

<sup>13</sup>C NMR (101 MHz, Chloroform-*d*) δ 141.5, 134.4, 133.4, 128.5, 126.0, 120.8, 42.6, 38.1, 33.1, 21.1.

HRMS (ESI) *m/z*: Calcd for C<sub>16</sub>H<sub>18</sub>BrS [M+H]<sup>+</sup>, 323.0287.; Found, 323.0284.

#### (4-bromophenyl)(1-(naphthalen-1-yl)propan-2-yl)sulfane (c2)

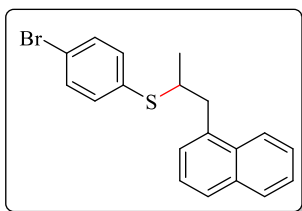

Purification by column chromatography on silica gel (hexane/ethyl acetate = 100:1, v/v) afforded the title compound as a colorless oil (54 mg, 76% yield).

<sup>1</sup>H NMR (400 MHz, Chloroform-*d*) δ 7.90 – 7.83 (m, 1H), 7.83 – 7.79 (m, 1H), 7.76 (d, *J* = 8.2 Hz, 1H), 7.53 – 7.46 (m, 2H), 7.42 (dd, *J* = 13.1, 8.4 Hz, 3H), 7.36 – 7.29 (m, 3H), 3.66 – 3.49 (m, 2H), 3.07 (dd, *J* = 13.5, 8.9 Hz, 1H), 1.27 (d, *J* = 6.6 Hz, 3H).

<sup>13</sup>C NMR (101 MHz, Chloroform-*d*) δ 135.1, 134.3, 134.2, 134.0, 131.9, 128.9, 127.6, 127.4, 126.0, 125.5, 125.3, 123.5, 121.3, 44.4, 40.6, 20.7.

HRMS (ESI) *m/z*: Calcd for C<sub>19</sub>H<sub>18</sub>BrS [M+H]<sup>+</sup>, 359.0288.; Found, 359.0295.

#### (4-bromophenyl)(1-(*o*-tolyl)propan-2-yl)sulfane (c3)

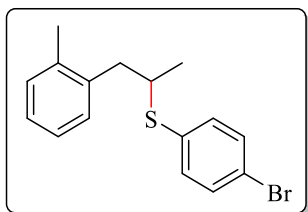

Purification by column chromatography on silica gel (hexane/ethyl acetate = 100:1, v/v) afforded the title compound as a green oil (48 mg, 75% yield).

<sup>1</sup>H NMR (400 MHz, Chloroform-*d*) δ 7.43 (d, *J* = 8.5 Hz, 2H), 7.30 (d, *J* = 8.5 Hz, 2H), 7.22 – 7.08 (m, 4H), 3.48 – 3.35 (m, 1H), 3.03 (dd, *J* = 13.8, 5.4 Hz, 1H), 2.70 (dd, *J* = 13.8, 9.3 Hz, 1H), 2.26 (s, 3H), 1.26 (d, *J* = 6.7 Hz, 3H).

$^{13}\text{C}$  NMR (101 MHz, Chloroform-*d*)  $\delta$  137.3, 136.2, 134.3, 134.0, 131.9, 130.4, 130.1, 126.6, 125.8, 121.2, 44.1, 40.5, 20.4, 19.5.

HRMS (ESI)  $m/z$ : Calcd for  $\text{C}_{16}\text{H}_{18}\text{BrS}$   $[\text{M}+\text{H}]^+$ , 323.0287.; Found, 323.0283.

#### (4-bromophenyl)(1-(2-bromophenyl)propan-2-yl)sulfane (c4)

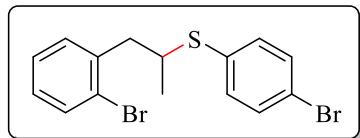

Purification by column chromatography on silica gel (hexane/ethyl acetate = 100:1, v/v) afforded the title compound as a colorless oil (46 mg, 64% yield).

$^1\text{H}$  NMR (400 MHz, Chloroform-*d*)  $\delta$  7.53 (d,  $J = 7.9$  Hz, 1H), 7.41 (d,  $J = 8.2$  Hz, 2H), 7.29 (d,  $J = 13.0$  Hz, 2H), 7.26 – 7.19 (m, 2H), 7.09 (td,  $J = 7.4, 2.1$  Hz, 1H), 3.59 (dq,  $J = 13.5, 6.8$  Hz, 1H), 3.11 (dd,  $J = 13.6, 6.1$  Hz, 1H), 2.85 (dd,  $J = 13.6, 8.6$  Hz, 1H), 1.26 (d,  $J = 6.7$  Hz, 3H).

$^{13}\text{C}$  NMR (101 MHz, Chloroform-*d*)  $\delta$  138.4, 134.0, 133.9, 133.0, 131.9, 128.3, 127.3, 124.7, 121.1, 43.5, 43.1, 20.4.

HRMS (ESI)  $m/z$ : Calcd for  $\text{C}_{15}\text{H}_{15}\text{Br}_2\text{S}$   $[\text{M}+\text{H}]^+$ , 386.9235.; Found, 386.9231.

#### (4-bromophenyl)(1-cyclohexylethyl)sulfane (c5)

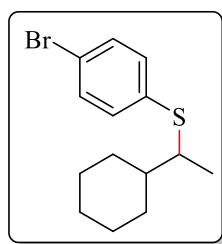

Purification by column chromatography on silica gel (hexane/ethyl acetate = 150:1, v/v) afforded the title compound as a colorless oil (48 mg, 80% yield).

$^1\text{H}$  NMR (400 MHz, Chloroform-*d*)  $\delta$  7.41 (d,  $J = 8.5$  Hz, 2H), 7.27 (d,  $J = 5.7$  Hz, 2H), 3.19 – 3.08 (m, 1H), 1.86 – 1.75 (m, 4H), 1.67 (dd,  $J = 11.5, 3.6$  Hz, 1H), 1.61 – 1.46 (m, 1H), 1.25 (d,  $J = 6.9$  Hz, 3H), 1.23 – 1.03 (m, 5H).

$^{13}\text{C}$  NMR (101 MHz, Chloroform-*d*)  $\delta$  135.7, 132.9, 131.8, 120.2, 49.7, 42.8, 30.7, 29.1, 26.5, 26.4, 26.4, 17.9.

HRMS (ESI)  $m/z$ : Calcd for  $\text{C}_{14}\text{H}_{20}\text{BrS}$   $[\text{M}+\text{H}]^+$ , 301.0443.; Found, 301.0449.

#### (4-bromobutan-2-yl)(4-bromophenyl)sulfane (c6)

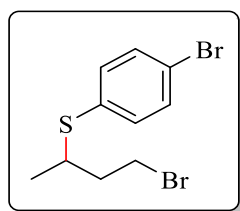

Purification by column chromatography on silica gel (hexane/ethyl acetate = 150:1, v/v) afforded the title compound as a colorless oil (46 mg, 72% yield).

$^1\text{H}$  NMR (400 MHz, Chloroform-*d*)  $\delta$  7.44 (d,  $J$  = 8.5 Hz, 2H), 7.30 (d,  $J$  = 8.5 Hz, 2H), 3.56 (ddt,  $J$  = 38.8, 10.1, 6.7 Hz, 2H), 3.38 (h,  $J$  = 6.8 Hz, 1H), 2.18 – 1.96 (m, 2H), 1.31 (d,  $J$  = 6.8 Hz, 3H).

$^{13}\text{C}$  NMR (101 MHz, Chloroform-*d*)  $\delta$  134.0, 133.4, 132.0, 121.4, 42.1, 39.2, 30.8, 20.9.

HRMS (ESI)  $m/z$ : Calcd for  $\text{C}_{10}\text{H}_{13}\text{Br}_2\text{S}$   $[\text{M}+\text{H}]^+$ , 324.9079.; Found, 324.9079.

#### 5-((4-bromophenyl)thio)hexanenitrile (c7)

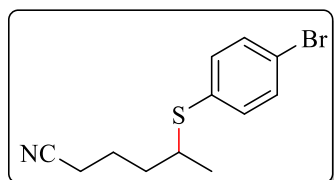

Purification by column chromatography on silica gel (hexane/ethyl acetate = 30:1, v/v) afforded the title compound as a yellow oil (48 mg, 85% yield).

$^1\text{H}$  NMR (600 MHz, Chloroform-*d*)  $\delta$  7.43 (d,  $J$  = 8.5 Hz, 2H), 7.26 (d,  $J$  = 4.5 Hz, 2H), 3.18 (h,  $J$  = 6.5 Hz, 1H), 2.36 (t,  $J$  = 7.1 Hz, 2H), 1.91 – 1.77 (m, 2H), 1.70 (q,  $J$  = 8.2, 7.4 Hz, 2H), 1.29 (d,  $J$  = 6.8 Hz, 3H).

$^{13}\text{C}$  NMR (151 MHz, Chloroform-*d*)  $\delta$  134.0, 133.6, 132.1, 121.4, 119.3, 43.0, 35.4, 22.8, 21.2, 17.1.

HRMS (ESI)  $m/z$ : Calcd for  $\text{C}_{12}\text{H}_{15}\text{BrNS}$   $[\text{M}+\text{H}]^+$ , 286.0082.; Found, 286.0075.

#### 5-((4-bromophenyl)thio)hexan-2-one (c8)

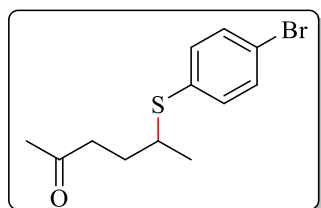

Purification by column chromatography on silica gel (hexane/ethyl acetate = 50:1, v/v) afforded the title compound as a colorless oil (41 mg, 72% yield).

$^1\text{H}$  NMR (400 MHz, Chloroform-*d*)  $\delta$  7.41 (d,  $J$  = 8.4 Hz, 2H), 7.24 (d,  $J$  = 8.4 Hz, 2H), 3.21 (h,  $J$  = 6.7 Hz, 1H), 2.63 (td,  $J$  = 7.7, 3.6 Hz, 2H), 2.14 (s, 3H), 1.90 – 1.72 (m, 2H), 1.27 (d,  $J$  = 6.8 Hz, 3H).

$^{13}\text{C}$  NMR (101 MHz, Chloroform-*d*)  $\delta$  207.9, 134.0, 133.6, 131.9, 121.0, 43.0, 40.6, 30.1, 30.0, 21.3.

HRMS (ESI)  $m/z$ : Calcd for  $\text{C}_{12}\text{H}_{16}\text{BrOS}$   $[\text{M}+\text{H}]^+$ , 289.0079.; Found, 289.0074.

#### 10-((4-bromophenyl)thio)undecanal (c9)

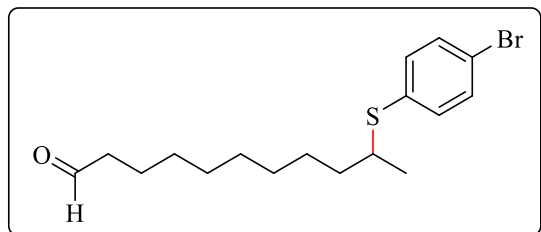

Purification by column chromatography on silica gel (hexane/ethyl acetate = 40:1, v/v) afforded the title compound as a brown oil (44 mg, 62% yield).

$^1\text{H}$  NMR (400 MHz, Chloroform-*d*)  $\delta$  9.77 (t,  $J$  = 1.8 Hz, 1H), 7.41 (d,  $J$  = 8.5 Hz, 2H), 7.25 (d,  $J$  = 8.5 Hz, 2H), 3.18 (h,  $J$  = 6.6 Hz, 1H), 2.42 (td,  $J$  = 7.4, 1.8 Hz, 2H), 1.67 – 1.49 (m, 4H), 1.49 – 1.35 (m, 3H), 1.34 – 1.28 (m, 7H), 1.26 (d,  $J$  = 6.7 Hz, 3H).

$^{13}\text{C}$  NMR (101 MHz, Chloroform-*d*)  $\delta$  202.8, 134.8, 133.3, 131.8, 120.6, 43.9, 43.5, 36.5, 29.3, 29.3, 29.1, 26.9, 22.0, 21.0.

HRMS (ESI)  $m/z$ : Calcd for  $\text{C}_{17}\text{H}_{26}\text{BrOS}$   $[\text{M}+\text{H}]^+$ , 359.0862.; Found, 359.0868.

### (4-bromophenyl)(4-(4'-(*p*-tolyl)-[1,1'-bi(cyclohexan)]-4-yl)butan-2-yl)sulfane (c10)

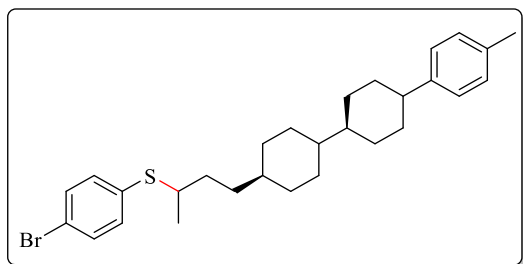

Purification by column chromatography on silica gel (hexane/ethyl acetate = 100:1, v/v) afforded the title compound as a white solid (68 mg, 68% yield). Mp. 99.3 - 103.2 °C.

$^1\text{H}$  NMR (400 MHz, Chloroform-*d*)  $\delta$  7.45 (d,  $J$  = 8.5 Hz, 2H), 7.28 (d,  $J$  = 8.5 Hz, 2H), 7.14 (s, 4H), 3.19 (q,  $J$  = 6.7 Hz, 1H), 2.51 – 2.39 (m, 1H), 2.36 (s, 3H), 1.99 – 1.91 (m, 2H), 1.90 – 1.83 (m, 2H), 1.79 (d,  $J$  = 9.9 Hz, 4H), 1.66 (dt,  $J$  = 16.0, 6.3 Hz, 1H), 1.59 – 1.52 (m, 1H), 1.50 – 1.32 (m, 5H), 1.30 (d,  $J$  = 6.5 Hz, 3H), 1.28 – 1.14 (m, 4H), 1.08 – 0.88 (m, 4H).

$^{13}\text{C}$  NMR (101 MHz, Chloroform-*d*)  $\delta$  144.9, 135.2, 134.9, 133.3, 131.9, 129.0, 126.7, 120.6, 44.3, 43.9, 43.4, 42.9, 37.9, 34.7, 34.0, 33.6, 33.5, 30.4, 30.1, 21.1, 21.0.

HRMS (ESI)  $m/z$ : Calcd for  $\text{C}_{29}\text{H}_{40}\text{BrS}$   $[\text{M}+\text{H}]^+$ , 501.2011.; Found, 501.2013.

### 3-((4-bromophenyl)thio)butan-1-ol (c11)

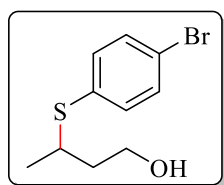

Purification by column chromatography on silica gel (hexane/ethyl acetate = 10:1, v/v) afforded the title compound as a brown oil (38 mg, 73% yield).

$^1\text{H}$  NMR (400 MHz, Methanol-*d*<sub>4</sub>)  $\delta$  7.46 (d,  $J$  = 8.5 Hz, 2H), 7.32 (d,  $J$  = 8.5 Hz, 2H), 4.61 (s, 1H), 3.79 – 3.63 (m, 2H), 3.42 (h,  $J$  = 6.8 Hz, 1H), 1.77 (ddt,  $J$  = 35.8, 14.0, 7.0 Hz, 2H), 1.30 (d,  $J$  = 6.7 Hz, 3H).

$^{13}\text{C}$  NMR (101 MHz, Methanol-*d*<sub>4</sub>)  $\delta$  134.7, 133.0, 131.6, 120.2, 58.9, 39.5, 39.0, 20.2.

HRMS (ESI)  $m/z$ : Calcd for  $\text{C}_{10}\text{H}_{14}\text{BrOS}$   $[\text{M}+\text{H}]^+$ , 262.9922.; Found, 262.9926.



**((5-((4-bromophenyl)thio)hexyl)oxy)(*tert*-butyl)dimethylsilane (c12)**

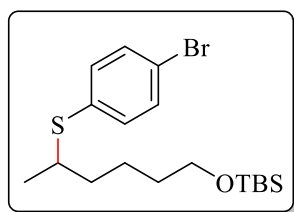

Purification by column chromatography on silica gel (hexane/ethyl acetate = 100:1, v/v) afforded the title compound as a colorless oil (68 mg, 84% yield).

$^1\text{H NMR}$  (400 MHz, Chloroform-*d*)  $\delta$  7.41 (d,  $J = 8.5$  Hz, 2H), 7.26 (d,  $J = 8.5$  Hz, 2H), 3.61 (t,  $J = 6.0$  Hz, 2H), 3.19 (q,  $J = 6.4$  Hz, 1H), 1.74 – 1.57 (m, 1H), 1.52 (m, 5H), 1.28 (d,  $J = 6.7$  Hz, 3H), 0.91 (s, 9H), 0.06 (s, 6H).

$^{13}\text{C NMR}$  (101 MHz, Chloroform-*d*)  $\delta$  134.7, 133.4, 131.8, 120.7, 62.9, 43.5, 36.3, 32.6, 26.0, 23.3, 21.0, 18.3, -5.3.

HRMS (ESI)  $m/z$ : Calcd for  $\text{C}_{18}\text{H}_{32}\text{BrOSSI}$   $[\text{M}+\text{H}]^+$ , 405.1102.; Found, 405.1105.

**(4-bromophenyl)(1-phenoxypropan-2-yl)sulfane (c13)**

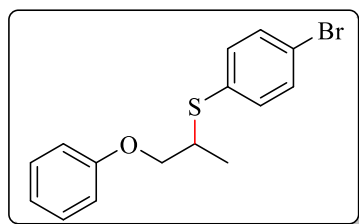

Purification by column chromatography on silica gel (hexane/ethyl acetate = 100:1, v/v) afforded the title compound as a colorless oil (27 mg, 42% yield).

$^1\text{H NMR}$  (400 MHz, Chloroform-*d*)  $\delta$  7.41 (d,  $J = 8.5$  Hz, 2H), 7.31 (d,  $J = 8.5$  Hz, 2H), 7.28 – 7.18 (m, 2H), 6.94 (t,  $J = 7.4$  Hz, 1H), 6.83 (d,  $J = 7.7$  Hz, 2H), 4.03 (dd,  $J = 9.5, 5.0$  Hz, 1H), 3.92 – 3.83 (m, 1H), 3.59 – 3.46 (m, 1H), 1.42 (d,  $J = 6.7$  Hz, 3H).

$^{13}\text{C NMR}$  (101 MHz, Chloroform-*d*)  $\delta$  158.5, 133.8, 133.4, 132.1, 129.5, 121.4, 121.1, 114.6, 71.5, 42.3, 18.0.

HRMS (ESI)  $m/z$ : Calcd for  $\text{C}_{15}\text{H}_{16}\text{BrOS}$   $[\text{M}+\text{H}]^+$ , 325.0080.; Found, 325.0082.

**(4-bromophenyl)(5-(4-((trifluoromethyl)thio)phenoxy)pentan-2-yl)sulfane (c14)**

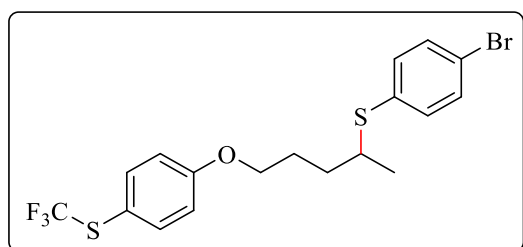

Purification by column chromatography on silica gel (hexane/ethyl acetate = 100:1, v/v) afforded the title compound as a yellow oil (78 mg, 86% yield).

<sup>1</sup>H NMR (400 MHz, Chloroform-*d*) δ 7.57 (d, *J* = 8.3 Hz, 2H), 7.41 (d, *J* = 8.1 Hz, 2H), 7.27 (d, *J* = 8.0 Hz, 2H), 6.90 (d, *J* = 8.4 Hz, 2H), 3.98 (t, *J* = 6.2 Hz, 2H), 3.25 (h, *J* = 6.7 Hz, 1H), 1.97 (p, *J* = 6.9 Hz, 2H), 1.83 – 1.66 (m, 2H), 1.32 (d, *J* = 6.7 Hz, 3H).

<sup>13</sup>C NMR (101 MHz, Chloroform-*d*) δ 161.2, 138.3, 134.2, 133.7, 131.9, 129.6 (d, *J* = 309.3 Hz), 121.0, 115.5 (d, *J* = 4.3 Hz), 67.7, 43.3, 32.9, 26.5, 21.1.

<sup>19</sup>F NMR (376 MHz, Chloroform-*d*) δ -43.90.

HRMS (ESI) *m/z*: Calcd for C<sub>18</sub>H<sub>19</sub>BrF<sub>3</sub>OS<sub>2</sub> [M+H]<sup>+</sup>, 452.9987.; Found, 452..9984

#### (4-bromophenyl)(5-(3-methyl-2-nitrophenoxy)pentan-2-yl)sulfane (c15)

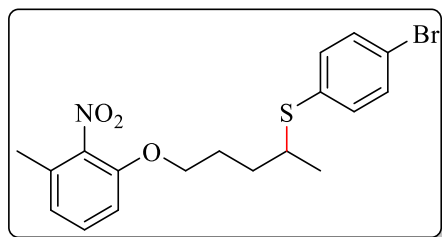

Purification by column chromatography on silica gel (hexane/ethyl acetate = 100:1, v/v) afforded the title compound as a colorless oil (52 mg, 63% yield).

<sup>1</sup>H NMR (400 MHz, Chloroform-*d*) δ 7.42 (d, *J* = 8.4 Hz, 2H), 7.29 – 7.20 (m, 3H), 6.85 (dd, *J* = 8.0, 5.1 Hz, 2H), 4.05 (t, *J* = 6.1 Hz, 2H), 3.22 (h, *J* = 6.7 Hz, 1H), 2.32 (s, 3H), 2.00 – 1.81 (m, 2H), 1.80 – 1.59 (m, 2H), 1.30 (d, *J* = 6.7 Hz, 3H).

<sup>13</sup>C NMR (101 MHz, Chloroform-*d*) δ 150.1, 134.1, 133.7, 131.9, 131.0, 130.6, 122.6, 121.0, 110.9, 69.0, 43.2, 32.7, 26.3, 21.1, 17.0.

HRMS (ESI) *m/z*: Calcd for C<sub>18</sub>H<sub>21</sub>BrNO<sub>3</sub>S [M+H]<sup>+</sup>, 412.0401.; Found, 412.0410.

#### 3-((5-((4-bromophenyl)thio)hexyl)oxy)pyridine (c16)

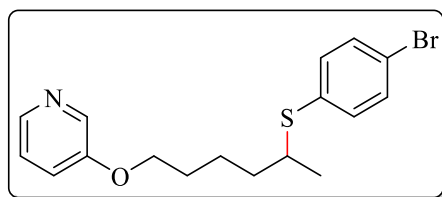

Purification by column chromatography on silica gel (hexane/ethyl acetate = 10:1, v/v) afforded the title compound as a white oil (44 mg, 60% yield).

<sup>1</sup>H NMR (400 MHz, Chloroform-*d*) δ 8.31 (d, *J* = 2.8 Hz, 1H), 8.22 (d, *J* = 4.5 Hz, 1H), 7.40 (d, *J* = 8.5 Hz, 2H), 7.27 (d, *J* = 4.6 Hz, 2H), 7.25 – 7.12 (m, 2H), 3.99 (t, *J* = 6.3 Hz, 2H), 3.21 (h, *J* = 6.4 Hz, 1H), 1.80 (p, *J* = 6.6 Hz, 2H), 1.76 – 1.51 (m, 4H), 1.29 (d, *J* = 6.7 Hz, 3H).

<sup>13</sup>C NMR (101 MHz, Chloroform-*d*) δ 155.2, 141.9, 137.9, 134.4, 133.6, 131.9, 123.9, 121.2, 120.8, 68.0, 43.4, 36.1, 28.9, 23.4, 21.0.

HRMS (ESI) *m/z*: Calcd for C<sub>17</sub>H<sub>21</sub>BrNOS [M+H]<sup>+</sup>, 368.0502.; Found, 368.0508.

**2-(4-((5-((4-bromophenyl)thio)hexyl)oxy)phenyl)-4,4,5,5-tetramethyl-1,3,2-dioxaborolane (c17)**

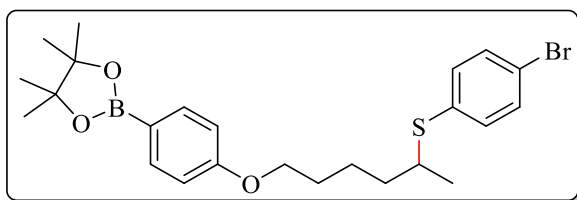

Purification by column chromatography on silica gel (hexane/ethyl acetate = 50:1, v/v) afforded the title compound as a yellow oil (63 mg, 64% yield).

$^1\text{H NMR}$  (400 MHz, Chloroform-*d*)  $\delta$  7.77 (d,  $J$  = 8.1 Hz, 2H), 7.40 (d,  $J$  = 8.3 Hz, 2H), 7.27 (d,  $J$  = 3.8 Hz, 2H), 6.89 (d,  $J$  = 8.1 Hz, 2H), 3.99 (t,  $J$  = 6.3 Hz, 2H), 3.22 (h,  $J$  = 6.5 Hz, 1H), 1.84 – 1.76 (m, 2H), 1.71 – 1.57 (m, 4H), 1.35 (s, 12H), 1.30 (d,  $J$  = 6.8 Hz, 3H).

$^{13}\text{C NMR}$  (101 MHz, Chloroform-*d*)  $\delta$  161.6, 136.5, 134.5, 133.6, 131.9, 120.8, 113.9, 83.5, 67.4, 43.5, 36.2, 29.0, 24.9, 23.5, 21.1.

HRMS (ESI)  $m/z$ : Calcd for  $\text{C}_{24}\text{H}_{33}\text{BBrO}_3\text{S}$   $[\text{M}+\text{H}]^+$ , 493.1407.; Found, 493.1407.

**(4-bromophenyl)(5-((4-chlorophenyl)thio)pentan-2-yl)sulfane (c18)**

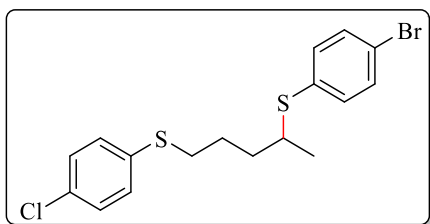

Purification by column chromatography on silica gel (hexane/ethyl acetate = 100:1, v/v) afforded the title compound as a colorless oil (52 mg, 65% yield).

$^1\text{H NMR}$  (400 MHz, Chloroform-*d*)  $\delta$  7.42 (d,  $J$  = 6.9 Hz, 2H), 7.28 – 7.21 (m, 6H), 3.18 (h,  $J$  = 6.6 Hz, 1H), 2.90 (t,  $J$  = 7.0 Hz, 2H), 1.79 (dd,  $J$  = 15.2, 6.4 Hz, 2H), 1.68 (dt,  $J$  = 14.4, 7.1 Hz, 2H), 1.27 (d,  $J$  = 6.8 Hz, 3H).

$^{13}\text{C NMR}$  (101 MHz, Chloroform-*d*)  $\delta$  135.0, 134.2, 133.7, 131.9, 130.6, 129.0, 121.0, 43.2, 35.4, 33.8, 26.3, 21.1.

HRMS (ESI)  $m/z$ : Calcd for  $\text{C}_{17}\text{H}_{19}\text{BrClS}_2$   $[\text{M}+\text{H}]^+$ , 402.9772.; Found, 402.9773.

**10-((4-bromophenyl)thio)undecyl acetate (c19)**

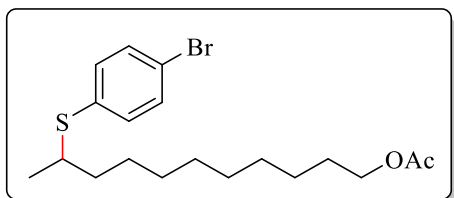

Purification by column chromatography on silica gel (hexane/ethyl acetate = 40:1, v/v) afforded the title compound as a colorless oil (77 mg, 96% yield).

$^1\text{H NMR}$  (400 MHz, Chloroform-*d*)  $\delta$  7.41 (d,  $J$  = 8.5 Hz, 2H), 7.25 (d,  $J$  = 8.5 Hz, 2H), 4.06 (t,  $J$  = 6.8 Hz, 2H), 3.18 (h,  $J$  = 6.6 Hz, 1H), 2.06 (s, 3H), 1.68 – 1.43 (m, 6H), 1.43 – 1.28 (m, 10H), 1.27 (d,  $J$  = 6.7 Hz, 3H).

$^{13}\text{C}$  NMR (101 MHz, Chloroform-*d*)  $\delta$  171.2, 134.8, 133.3, 131.8, 120.6, 64.6, 43.5, 36.5, 29.4, 29.2, 28.6, 27.0, 25.9, 21.0, 21.0.

HRMS (ESI) *m/z*: Calcd for  $\text{C}_{19}\text{H}_{30}\text{BrO}_2\text{S}$   $[\text{M}+\text{H}]^+$ , 403.1125.; Found, 403.1121.

#### 8-((4-bromophenyl)thio)nonyl 4-methylbenzenesulfonate (c20)

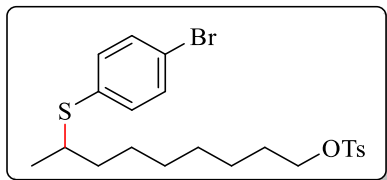

Purification by column chromatography on silica gel (hexane/ethyl acetate = 40:1, v/v) afforded the title compound as a yellow oil (64 mg, 66% yield).

$^1\text{H}$  NMR (400 MHz, Chloroform-*d*)  $\delta$  7.79 (d,  $J$  = 8.3 Hz, 2H), 7.40 (d,  $J$  = 8.4 Hz, 2H), 7.34 (d,  $J$  = 8.0 Hz, 2H), 7.24 (d,  $J$  = 8.5 Hz, 2H), 4.01 (t,  $J$  = 6.5 Hz, 2H), 3.17 (h,  $J$  = 6.6 Hz, 1H), 2.44 (s, 3H), 1.67 – 1.33 (m, 7H), 1.25 (d,  $J$  = 6.7 Hz, 3H), 1.24 – 1.17 (m, 5H).

$^{13}\text{C}$  NMR (101 MHz, Chloroform-*d*)  $\delta$  144.6, 134.8, 133.3, 131.8, 129.8, 127.9, 120.6, 70.7, 43.4, 36.5, 29.2, 28.8, 28.8, 26.9, 25.3, 21.6, 21.0.

HRMS (ESI) *m/z*: Calcd for  $\text{C}_{22}\text{H}_{30}\text{BrO}_3\text{S}_2$   $[\text{M}+\text{H}]^+$ , 487.0795.; Found, 487.0794.

#### 4-((4-bromophenyl)thio)pentyl cyclobutanecarboxylate (c21)

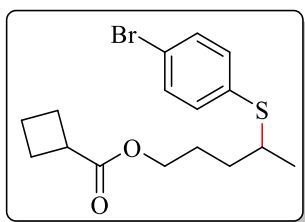

Purification by column chromatography on silica gel (hexane/ethyl acetate = 30:1, v/v) afforded the title compound as a colorless oil (43 mg, 61% yield).

$^1\text{H}$  NMR (400 MHz, Chloroform-*d*)  $\delta$  7.42 (d,  $J$  = 8.5 Hz, 2H), 7.26 (d,  $J$  = 8.5 Hz, 2H), 4.08 (t,  $J$  = 6.5 Hz, 2H), 3.20 (h,  $J$  = 6.7 Hz, 1H), 3.10 (q,  $J$  = 9.4, 8.5 Hz, 1H), 2.26 (dd,  $J$  = 11.8, 8.9 Hz, 2H), 2.23 – 2.14 (m, 2H), 2.05 – 1.88 (m, 2H), 1.84 – 1.75 (m, 2H), 1.71 – 1.52 (m, 2H), 1.29 (d,  $J$  = 6.7 Hz, 3H).

$^{13}\text{C}$  NMR (101 MHz, Chloroform-*d*)  $\delta$  175.5, 134.2, 133.7, 131.9, 121.0, 63.8, 43.2, 38.1, 32.8, 26.1, 25.3, 21.0, 18.4.

HRMS (ESI) *m/z*: Calcd for  $\text{C}_{16}\text{H}_{22}\text{BrO}_2\text{S}$   $[\text{M}+\text{H}]^+$ , 359.0499.; Found, 359.0491.

#### 3-((4-bromophenyl)thio)butyl thiophene-2-carboxylate (c22)

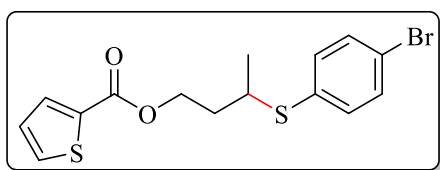

Purification by column chromatography on silica gel (hexane/ethyl acetate = 30:1, v/v) afforded the title compound as a colorless oil (46 mg, 62% yield).

$^1\text{H}$  NMR (600 MHz, Chloroform-*d*)  $\delta$  7.78 (d,  $J$  = 4.0 Hz, 1H), 7.56 (d,  $J$  = 4.9 Hz, 1H), 7.39 (d,  $J$  = 8.1 Hz, 2H), 7.28 (d,  $J$  = 8.2 Hz, 2H), 7.11 (t,  $J$  = 4.4 Hz, 1H), 4.44 (t,  $J$  = 6.3 Hz, 2H), 3.35 (h,  $J$  = 6.8 Hz, 1H), 1.99 (ddq,  $J$  = 52.0, 13.4, 6.5 Hz, 2H), 1.36 (d,  $J$  = 6.8 Hz, 3H).

$^{13}\text{C}$  NMR (151 MHz, Chloroform-*d*)  $\delta$  162.0, 133.9, 133.7, 133.6, 133.5, 132.5, 132.0, 127.8, 121.2, 62.6, 40.5, 35.6, 21.2.

HRMS (ESI)  $m/z$ : Calcd for  $\text{C}_{15}\text{H}_{16}\text{BrO}_2\text{S}_2$   $[\text{M}+\text{H}]^+$ , 372.9749.; Found, 372.9752.

#### 4-((4-bromophenyl)thio)pentyl 2,2-diphenylacetate (c23)

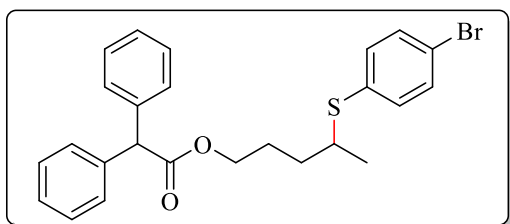

Purification by column chromatography on silica gel (hexane/ethyl acetate = 30:1, v/v) afforded the title compound as a yellow oil (81 mg, 86% yield).

$^1\text{H}$  NMR (400 MHz, Chloroform-*d*)  $\delta$  7.44 (d,  $J$  = 8.5 Hz, 2H), 7.38 – 7.35 (m, 8H), 7.34 – 7.29 (m, 2H), 7.26 (d,  $J$  = 8.5 Hz, 2H), 5.07 (s, 1H), 4.21 (t,  $J$  = 7.3 Hz, 2H), 3.17 (h,  $J$  = 6.7 Hz, 1H), 1.87 – 1.76 (m, 2H), 1.68 – 1.46 (m, 2H), 1.26 (d,  $J$  = 6.7 Hz, 3H).

$^{13}\text{C}$  NMR (101 MHz, Chloroform-*d*)  $\delta$  172.5, 138.7, 134.2, 133.7, 132.0, 128.7, 127.3, 121.0, 64.8, 57.2, 43.1, 32.8, 26.0, 21.1.

HRMS (ESI)  $m/z$ : Calcd for  $\text{C}_{25}\text{H}_{26}\text{BrO}_2\text{S}$   $[\text{M}+\text{H}]^+$ , 471.0813.; Found, 471.0811.

#### 3-((4-bromophenyl)thio)butyl 2-(1,3-dioxoisindolin-2-yl)acetate (c24)

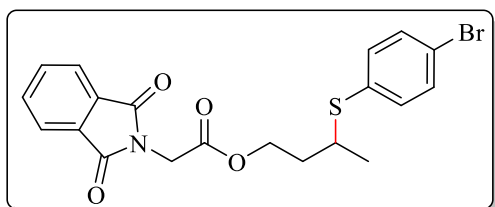

Purification by column chromatography on silica gel (hexane/ethyl acetate = 20:1, v/v) afforded the title compound as a colorless oil (75 mg, 83% yield).

$^1\text{H}$  NMR (400 MHz, Chloroform-*d*)  $\delta$  7.89 (dd,  $J$  = 5.4, 3.1 Hz, 2H), 7.76 (dd,  $J$  = 5.5, 3.1 Hz, 2H), 7.41 (d,  $J$  = 8.5 Hz, 2H), 7.24 (d,  $J$  = 8.4 Hz, 2H), 4.44 (s, 2H), 4.32 (t,  $J$  = 7.3 Hz, 1H), 3.22 (h,  $J$  = 6.8 Hz, 1H), 1.87 (dddd,  $J$  = 27.5, 20.9, 13.4, 6.5 Hz, 2H), 1.28 (d,  $J$  = 6.7 Hz, 3H).

$^{13}\text{C}$  NMR (101 MHz, Chloroform-*d*)  $\delta$  167.4, 167.1, 134.3, 133.9, 133.6, 132.7, 132.0, 132.0, 123.6, 123.6, 121.3, 63.4, 40.3, 38.9, 35.2, 21.1.

HRMS (ESI)  $m/z$ : Calcd for  $\text{C}_{20}\text{H}_{19}\text{BrNO}_4\text{S}$   $[\text{M}+\text{H}]^+$ , 450.0194.; Found, 450.0192.

#### ethyl 10-((4-bromophenyl)thio)undecanoate (c25)

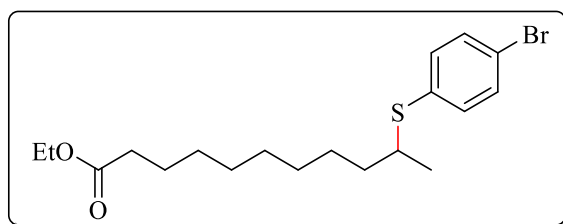

Purification by column chromatography on silica gel (hexane/ethyl acetate = 50:1, v/v) afforded the title compound as a brown oil (69 mg, 86% yield).

$^1\text{H NMR}$  (400 MHz, Chloroform-*d*)  $\delta$  7.40 (d,  $J = 8.5$  Hz, 2H), 7.24 (d,  $J = 8.5$  Hz, 2H), 4.12 (q,  $J = 7.1$  Hz, 2H), 3.17 (h,  $J = 6.6$  Hz, 1H), 2.28 (t,  $J = 7.5$  Hz, 2H), 1.65 – 1.54 (m, 4 H), 1.49 – 1.37 (m, 2H), 1.30 – 1.27 (m, 5H), 1.26 (d,  $J = 3.3$  Hz, 3H), 1.26 – 1.23 (m, 6H).

$^{13}\text{C NMR}$  (101 MHz, Chloroform-*d*)  $\delta$  173.8, 134.8, 133.3, 131.8, 120.6, 60.1, 43.5, 36.5, 34.3, 29.3, 29.3, 29.2, 29.1, 26.9, 24.9, 21.0, 14.2.

HRMS (ESI)  $m/z$ : Calcd for  $\text{C}_{19}\text{H}_{30}\text{BrO}_2\text{S}$   $[\text{M}+\text{H}]^+$ , 403.1125.; Found, 403.1125.

#### 4-((4-bromophenyl)thio)pentyl 2,2,3,3,4,4,4-heptafluorobutanoate (c26)

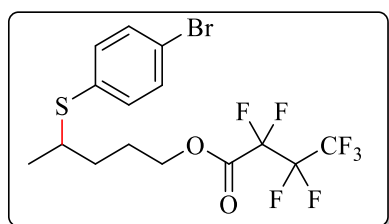

Purification by column chromatography on silica gel (hexane/ethyl acetate = 100:1, v/v) afforded the title compound as a yellow oil (50 mg, 53% yield).

$^1\text{H NMR}$  (600 MHz, Chloroform-*d*)  $\delta$  7.42 (d,  $J = 8.4$  Hz, 2H), 7.25 (d,  $J = 8.5$  Hz, 2H), 4.38 (t,  $J = 6.5$  Hz, 2H), 3.19 (h,  $J = 6.7$  Hz, 1H), 1.92 (tt,  $J = 8.8, 6.5$  Hz, 2H), 1.70 – 1.55 (m, 2H), 1.29 (d,  $J = 6.8$  Hz, 3H).

$^{13}\text{C NMR}$  (151 MHz, Chloroform-*d*)  $\delta$  158.3 (t,  $J = 29.4$  Hz), 134.4, 133.9, 133.7, 132.0, 130.2 (d,  $J = 48.2$  Hz), 128.6 (d,  $J = 12.1$  Hz), 127.7 (d,  $J = 9.3$  Hz), 121.3, 117.4 (dt,  $J = 287.6, 33.4$  Hz), 109.4 (d,  $J = 32.9$  Hz), 106.7 (dt,  $J = 266.1, 32.4$  Hz), 68.2, 43.1, 32.3, 25.5, 21.0.

$^{19}\text{F NMR}$  (565 MHz, Chloroform-*d*)  $\delta$  -80.75 (t,  $J = 8.5$  Hz), -119.37 (q,  $J = 8.6$  Hz), -126.99.

HRMS (ESI)  $m/z$ : Calcd for  $\text{C}_{15}\text{H}_{15}\text{BrF}_7\text{O}_2\text{S}$   $[\text{M}+\text{H}]^+$ , 472.9839.; Found, 472.9833.

#### *N*-4-((4-bromophenyl)thio)pentyl-4-methylbenzenesulfonamide (c27)

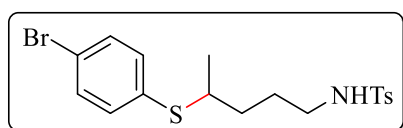

Purification by column chromatography on silica gel (hexane/ethyl acetate = 10:1, v/v) afforded the title compound as a colorless oil (61 mg, 71% yield).

$^1\text{H NMR}$  (400 MHz, Chloroform-*d*)  $\delta$  7.75 (d,  $J = 8.0$  Hz, 2H), 7.41 (d,  $J = 8.4$  Hz, 2H), 7.32 (d,  $J = 8.0$  Hz, 2H), 7.22 (d,  $J = 8.4$  Hz, 2H), 4.64 (s, 1H), 3.12 (h,  $J = 6.6$  Hz, 1H), 2.94 (q,  $J = 6.6$  Hz, 2H), 2.44 (s, 3H), 1.69 – 1.55 (m, 2H), 1.58 – 1.42 (m, 2H), 1.22 (d,  $J = 6.5$  Hz, 3H).

$^{13}\text{C}$  NMR (101 MHz, Chloroform-*d*)  $\delta$  143.5, 134.1, 133.6, 131.9, 129.7, 127.1, 121.0, 43.1, 42.9, 33.3, 27.0, 21.5, 21.1.

HRMS (ESI) *m/z*: Calcd for  $\text{C}_{18}\text{H}_{23}\text{BrNO}_2\text{S}_2$   $[\text{M}+\text{H}]^+$ , 430.0328.; Found, 430.0325.

***tert*-butyl (2-((4-bromophenyl)thio)propyl)carbamate (c28)**

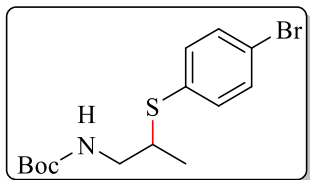

Purification by column chromatography on silica gel (hexane/ethyl acetate = 10:1, v/v) afforded the title compound as a colorless oil (49 mg, 70% yield).

$^1\text{H}$  NMR (400 MHz, Chloroform-*d*)  $\delta$  7.42 (d,  $J$  = 8.5 Hz, 2H), 7.29 (d,  $J$  = 8.5 Hz, 2H), 4.94 (s, 1H), 3.36 – 3.27 (m, 1H), 3.26 – 3.15 (m, 2H), 1.44 (s, 9H), 1.28 (d,  $J$  = 6.8 Hz, 3H).

$^{13}\text{C}$  NMR (101 MHz, Chloroform-*d*)  $\delta$  155.8, 133.8, 133.2, 132.1, 121.4, 45.5, 43.9, 29.9, 28.4, 18.6.

HRMS (ESI) *m/z*: Calcd for  $\text{C}_{14}\text{H}_{21}\text{BrNO}_2\text{S}$   $[\text{M}+\text{H}]^+$ , 348.0451.; Found, 348.0456.

**10-((4-bromophenyl)thio)-*N,N*-diethylundecanamide (c29)**

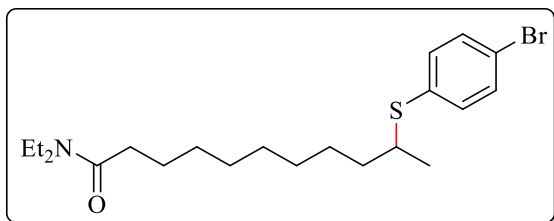

Purification by column chromatography on silica gel (hexane/ethyl acetate = 20:1, v/v) afforded the title compound as a colorless oil (63 mg, 73% yield).

$^1\text{H}$  NMR (400 MHz, Chloroform-*d*)  $\delta$  7.39 (d,  $J$  = 8.4 Hz, 2H), 7.23 (d,  $J$  = 8.5 Hz, 2H), 3.36 (q,  $J$  = 7.1 Hz, 2H), 3.29 (q,  $J$  = 7.1 Hz, 2H), 3.16 (h,  $J$  = 6.6 Hz, 1H), 2.32 – 2.23 (t,  $J$  = 7.6 Hz, 2H), 1.69 – 1.45 (m, 4H), 1.45 – 1.36 (m, 2H), 1.32 – 1.26 (m, 8H), 1.24 (d,  $J$  = 6.6 Hz, 3H), 1.16 (t,  $J$  = 7.1 Hz, 3H), 1.10 (t,  $J$  = 7.1 Hz, 3H).

$^{13}\text{C}$  NMR (101 MHz, Chloroform-*d*)  $\delta$  172.3, 134.8, 133.3, 131.8, 120.5, 43.5, 42.0, 40.0, 36.5, 33.1, 29.5, 29.4, 26.9, 25.5, 21.0, 14.4, 13.1.

HRMS (ESI) *m/z*: Calcd for  $\text{C}_{21}\text{H}_{35}\text{BrNOS}$   $[\text{M}+\text{H}]^+$ , 430.1598.; Found, 430.1596.

**2-(3-((4-bromophenyl)thio)butyl)isoindoline-1,3-dione (c30)**

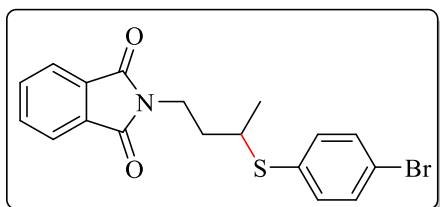

Purification by column chromatography on silica gel (hexane/ethyl acetate = 10:1, v/v) afforded the title compound as a colorless oil (75 mg, 96% yield).

<sup>1</sup>H NMR (400 MHz, Chloroform-*d*) δ 7.86 – 7.75 (m, 2H), 7.74 – 7.68 (m, 2H), 7.37 (d, *J* = 8.1 Hz, 2H), 7.29 (d, *J* = 8.0 Hz, 2H), 3.86 (dp, *J* = 21.4, 7.3 Hz, 2H), 3.15 (h, *J* = 6.7 Hz, 1H), 1.88 (dh, *J* = 28.7, 7.3 Hz, 2H), 1.32 (d, *J* = 6.7 Hz, 3H).

<sup>13</sup>C NMR (101 MHz, Chloroform-*d*) δ 168.3, 134.6, 134.0, 132.1, 131.9, 123.3, 121.5, 41.5, 35.9, 35.0, 21.2.

HRMS (ESI) *m/z*: Calcd for C<sub>18</sub>H<sub>17</sub>BrNO<sub>2</sub>S [M+H]<sup>+</sup>, 392.0138.; Found, 392.0131.

### 2-((4-bromophenyl)thio)pentyl)benzo[d]isothiazol-3(2H)-one 1,1-dioxide (c31)

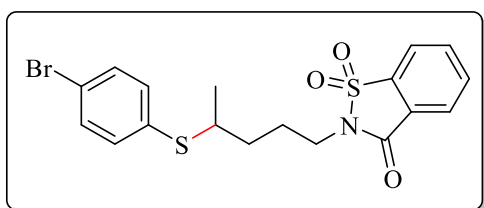

Purification by column chromatography on silica gel (hexane/ethyl acetate = 30:1, v/v) afforded the title compound as a colorless oil (65 mg, 74% yield).

<sup>1</sup>H NMR (400 MHz, Chloroform-*d*) δ 8.09 – 8.02 (m, 1H), 7.97 – 7.79 (m, 3H), 7.38 (d, *J* = 8.5 Hz, 2H), 7.27 (d, *J* = 8.5 Hz, 2H), 3.79 (t, *J* = 7.2 Hz, 2H), 3.23 (h, *J* = 6.7 Hz, 1H), 2.03 (p, *J* = 7.2 Hz, 2H), 1.78 – 1.58 (m, 2H), 1.29 (d, *J* = 6.7 Hz, 3H).

<sup>13</sup>C NMR (101 MHz, Chloroform-*d*) δ 159.0, 137.6, 134.8, 134.4, 134.0, 133.9, 131.9, 127.3, 125.2, 121.1, 120.9, 43.1, 39.0, 33.3, 25.8, 21.0.

HRMS (ESI) *m/z*: Calcd for C<sub>18</sub>H<sub>19</sub>BrNO<sub>3</sub>S<sub>2</sub> [M+H]<sup>+</sup>, 441.9964.; Found, 441.9956.

### (4-bromophenyl)(6-tosylhexan-2-yl)sulfane (c32)

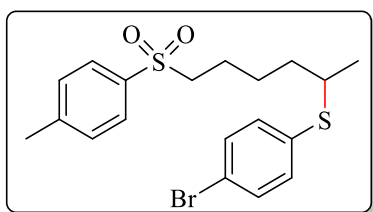

Purification by column chromatography on silica gel (hexane/ethyl acetate = 30:1, v/v) afforded the title compound as a yellow oil (61 mg, 71% yield).

<sup>1</sup>H NMR (400 MHz, Chloroform-*d*) δ 7.77 (d, *J* = 7.9 Hz, 2H), 7.37 (dd, *J* = 13.4, 8.0 Hz, 4H), 7.21 (d, *J* = 8.3 Hz, 2H), 3.11 (h, *J* = 6.4 Hz, 1H), 3.08 – 3.01 (m, 2H), 2.45 (s, 3H), 1.70 (p, *J* = 7.1 Hz, 2H), 1.51 (p, *J* = 6.6 Hz, 4H), 1.22 (d, *J* = 6.7 Hz, 3H).

<sup>13</sup>C NMR (101 MHz, Chloroform-*d*) δ 144.7, 136.2, 134.2, 133.5, 131.9, 129.9, 128.1, 120.9, 56.2, 43.1, 35.9, 25.6, 22.6, 21.7, 21.0.

HRMS (ESI) *m/z*: Calcd for C<sub>19</sub>H<sub>24</sub>BrO<sub>2</sub>S<sub>2</sub> [M+H]<sup>+</sup>, 429.0375.; Found, 429.0370.



**methyl 1-(5-((4-bromophenyl)thio)hexyl)-1*H*-indole-4-carboxylate (c33)**

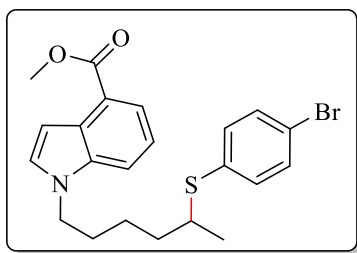

Purification by column chromatography on silica gel (hexane/ethyl acetate = 30:1, v/v) afforded the title compound as a yellow oil (96 mg, 99% yield).

$^1\text{H}$  NMR (600 MHz, Chloroform-*d*)  $\delta$  7.90 (d,  $J$  = 7.4 Hz, 1H), 7.51 (d,  $J$  = 8.2 Hz, 1H), 7.38 (d,  $J$  = 8.6 Hz, 2H), 7.25 (d,  $J$  = 7.6 Hz, 1H), 7.22 – 7.17 (m, 3H), 7.12 (d,  $J$  = 3.1 Hz, 1H), 4.14 (t,  $J$  = 7.0 Hz, 2H), 3.98 (s, 3H), 3.10 (h,  $J$  = 6.7 Hz, 1H), 1.82 (p,  $J$  = 7.3 Hz, 2H), 1.67 – 1.37 (m, 4H), 1.21 (d,  $J$  = 6.7 Hz, 3H).

$^{13}\text{C}$  NMR (151 MHz, Chloroform-*d*)  $\delta$  168.1, 136.7, 134.3, 133.6, 131.9, 129.9, 128.1, 123.0, 121.7, 120.9, 120.6, 114.1, 102.4, 51.8, 46.4, 43.4, 36.1, 30.1, 24.4, 21.1.

HRMS (ESI)  $m/z$ : Calcd for  $\text{C}_{22}\text{H}_{25}\text{BrNO}_2\text{S}$   $[\text{M}+\text{H}]^+$ , 448.0765.; Found, 448.0762.

***tert*-butyl 3-((4-bromophenyl)thio)-3-methylazetidine-1-carboxylate (c34)**

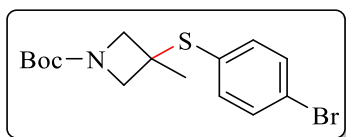

Purification by column chromatography on silica gel (hexane/ethyl acetate = 50:1, v/v) afforded the title compound as a white solid (48 mg, 68% yield). Mp. 80.6 – 83.7 °C.

$^1\text{H}$  NMR (400 MHz, Chloroform-*d*)  $\delta$  7.47 (d,  $J$  = 8.1 Hz, 2H), 7.31 (d,  $J$  = 8.1 Hz, 2H), 4.03 (d,  $J$  = 8.9 Hz, 2H), 3.82 (d,  $J$  = 8.9 Hz, 2H), 1.57 (s, 3H), 1.41 (s, 9H).

$^{13}\text{C}$  NMR (101 MHz, Chloroform-*d*)  $\delta$  156.1, 136.1, 132.2, 131.4, 123.2, 79.9, 62.1, 43.2, 28.3, 26.7.

HRMS (ESI)  $m/z$ : Calcd for  $\text{C}_{15}\text{H}_{21}\text{BrNO}_2\text{S}$   $[\text{M}+\text{H}]^+$ , 360.0451.; Found, 360.0445.

***tert*-butyl 4-((4-bromophenyl)thio)-4-methylpiperidine-1-carboxylate (c35)**

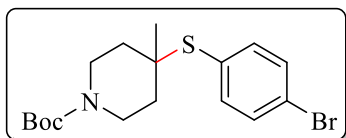

Purification by column chromatography on silica gel (hexane/ethyl acetate = 50:1, v/v) afforded the title compound as a colorless oil (35 mg, 45% yield).

$^1\text{H}$  NMR (400 MHz, Chloroform-*d*)  $\delta$  7.47 (d,  $J$  = 8.4 Hz, 2H), 7.36 (d,  $J$  = 8.4 Hz, 2H), 3.66 – 3.58 (m, 2H), 3.54 – 3.43 (m, 2H), 1.70 – 1.59 (m, 2H), 1.57 – 1.49 (m, 2H), 1.46 (s, 9H), 1.27 (s, 3H).

$^{13}\text{C}$  NMR (101 MHz, Chloroform-*d*)  $\delta$  154.8, 139.1, 131.9, 123.8, 79.5, 48.3, 37.0, 28.8, 28.4.

HRMS (ESI)  $m/z$ : Calcd for  $\text{C}_{17}\text{H}_{25}\text{BrNO}_2\text{S}$   $[\text{M}+\text{H}]^+$ , 388.0764.; Found, 388.0761.

**8-((4-bromophenyl)thio)-8-methyl-1,4-dioxaspiro[4.5]decane (c36)**

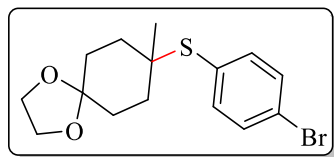

Purification by column chromatography on silica gel (hexane/ethyl acetate = 50:1, v/v) afforded the title compound as a colorless oil (40 mg, 54% yield).

$^1\text{H NMR}$  (400 MHz, Chloroform-*d*)  $\delta$  7.46 (d,  $J$  = 8.4 Hz, 2H), 7.37 (d,  $J$  = 8.4 Hz, 2H), 4.01 – 3.89 (m, 4H), 2.02 (ddd,  $J$  = 13.8, 11.2, 4.3 Hz, 2H), 1.72 – 1.56 (m, 6H), 1.26 (s, 3H).

$^{13}\text{C NMR}$  (101 MHz, Chloroform-*d*)  $\delta$  138.9, 131.7, 131.0, 123.5, 108.5, 64.3, 64.2, 49.4, 35.5, 31.2.  
HRMS (ESI)  $m/z$ : Calcd for  $\text{C}_{17}\text{H}_{25}\text{BrO}_2\text{S}$   $[\text{M}+\text{H}]^+$ , 374.0733.; Found, 345.0344.

**(4-bromophenyl)(1-methyl-4-phenylcyclohexyl)sulfane (c37)**

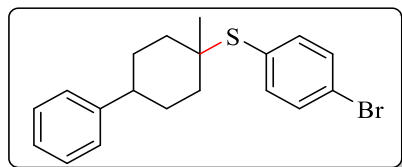

Purification by column chromatography on silica gel (hexane/ethyl acetate = 100:1, v/v) afforded the title compound as a white solid (38 mg, 52% yield). Mp. 64.9 – 66.8 °C.

$^1\text{H NMR}$  (400 MHz, Chloroform-*d*)  $\delta$  7.48 (d,  $J$  = 6.7 Hz, 2H), 7.42 (d,  $J$  = 8.5 Hz, 2H), 7.41 – 7.33 (m, 4H), 7.30 – 7.21 (m, 1H), 2.54 (tt,  $J$  = 12.3, 3.6 Hz, 1H), 2.18 (qd,  $J$  = 13.1, 3.2 Hz, 2H), 1.86 (d,  $J$  = 14.4 Hz, 2H), 1.77 (dd,  $J$  = 13.5, 3.3 Hz, 2H), 1.62 – 1.49 (m, 2H), 1.28 (s, 3H).

$^{13}\text{C NMR}$  (101 MHz, Chloroform-*d*)  $\delta$  147.1, 139.1, 131.7, 131.4, 128.4, 127.0, 126.1, 123.4, 50.4, 44.2, 38.2, 32.0, 29.9.

HRMS (ESI)  $m/z$ : Calcd for  $\text{C}_{19}\text{H}_{22}\text{BrS}$   $[\text{M}+\text{H}]^+$ , 363.0601.; Found, 363.0598.

**(4-bromophenyl)((1*r*,3*r*,5*r*,7*r*)-2-methyladamantan-2-yl)sulfane (c38)**

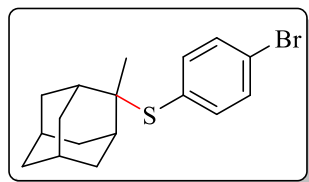

Purification by column chromatography on silica gel (hexane/ethyl acetate = 50:1, v/v) afforded the title compound as a white solid (45 mg, 67% yield). Mp. 131.0 - 132.2 °C.

$^1\text{H NMR}$  (400 MHz, Chloroform-*d*)  $\delta$  7.44 (d,  $J$  = 8.4 Hz, 2H), 7.35 (d,  $J$  = 8.5 Hz, 2H), 2.73 (d,  $J$  = 15.9 Hz, 2H), 2.17 – 1.60 (m, 12H), 1.35 (s, 3H).

$^{13}\text{C NMR}$  (101 MHz, Chloroform-*d*)  $\delta$  138.7, 132.3, 131.5, 123.0, 58.4, 39.3, 37.1, 33.8, 27.7, 27.5, 26.4.

HRMS (ESI)  $m/z$ : Calcd for  $\text{C}_{17}\text{H}_{22}\text{BrS}$   $[\text{M}+\text{H}]^+$ , 339.0600.; Found, 339.0602.

**(4-bromophenyl)(2-(4-methylcyclohex-3-en-1-yl)propan-2-yl)sulfane (c39)**

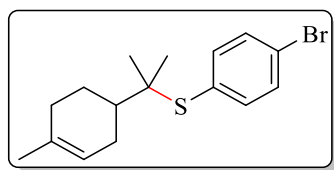

Purification by column chromatography on silica gel (hexane/ethyl acetate = 100:1, v/v) afforded the title compound as a colorless oil (36 mg, 55% yield).

$^1\text{H NMR}$  (400 MHz, Chloroform-*d*)  $\delta$  7.46 (d,  $J = 8.4$  Hz, 2H), 7.38 (d,  $J = 8.4$  Hz, 2H), 5.41 – 5.36 (m, 1H), 2.24 – 2.16 (m, 1H), 2.15 – 2.06 (m, 1H), 2.05 – 1.98 (m, 2H), 1.99 – 1.88 (m, 1H), 1.67 (s, 3H), 1.62 – 1.51 (m, 1H), 1.44 – 1.32 (m, 1H), 1.23 (s, 3H), 1.19 (s, 3H).

$^{13}\text{C NMR}$  (101 MHz, Chloroform-*d*)  $\delta$  139.2, 134.1, 131.6, 131.5, 123.4, 120.7, 53.1, 42.8, 31.2, 27.2, 27.2, 25.1, 24.8, 23.3.

HRMS (ESI)  $m/z$ : Calcd for  $\text{C}_{16}\text{H}_{22}\text{BrS}$   $[\text{M}+\text{H}]^+$ , 327.0600.; Found, 327.0591.

**(4-bromophenyl)(2-methyl-4-(2,6,6-trimethylcyclohex-1-en-1-yl)butan-2-yl)sulfane (c40)**

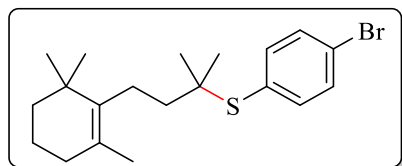

Purification by column chromatography on silica gel (hexane/ethyl acetate = 100:1, v/v) afforded the title compound as a white solid (44 mg, 57% yield). Mp. 68.3-70.3 °C.

$^1\text{H NMR}$  (400 MHz, Chloroform-*d*)  $\delta$  7.47 (d,  $J = 8.5$  Hz, 2H), 7.41 (d,  $J = 8.4$  Hz, 2H), 2.19 – 2.10 (m, 2H), 1.92 (t,  $J = 6.3$  Hz, 2H), 1.70 – 1.60 (m, 2H), 1.60 – 1.53 (m, 5H), 1.47 – 1.39 (m, 2H), 1.27 (s, 6H), 1.00 (s, 6H).

$^{13}\text{C NMR}$  (101 MHz, Chloroform-*d*)  $\delta$  138.9, 136.5, 133.0, 131.6, 127.3, 123.3, 50.0, 42.8, 39.9, 35.1, 32.8, 28.7, 28.5, 23.6, 19.9, 19.5.

HRMS (ESI)  $m/z$ : Calcd for  $\text{C}_{20}\text{H}_{30}\text{BrS}$   $[\text{M}+\text{H}]^+$ , 383.1227.; Found, 383.1232.

**hexan-2-yl(4-methoxyphenyl)sulfane (c41)**

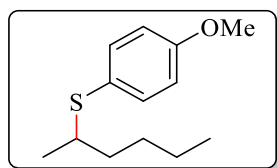

Purification by column chromatography on silica gel (hexane/ethyl acetate = 100:1, v/v) afforded the title compound as a colorless oil (30 mg, 65% yield).

$^1\text{H NMR}$  (400 MHz, Chloroform-*d*)  $\delta$  7.40 (d,  $J = 8.8$  Hz, 2H), 6.86 (d,  $J = 8.7$  Hz, 2H), 3.82 (s, 3H), 3.02 (h,  $J = 6.4$  Hz, 1H), 1.59 – 1.41 (m, 4H), 1.37 – 1.27 (m, 2H), 1.23 (d,  $J = 6.7$  Hz, 3H), 0.91 (t,  $J = 7.2$  Hz, 3H).

$^{13}\text{C NMR}$  (101 MHz, Chloroform-*d*)  $\delta$  159.3, 135.6, 114.3, 55.3, 44.6, 36.3, 29.3, 22.6, 21.1, 14.0.

HRMS (ESI)  $m/z$ : Calcd for  $\text{C}_{13}\text{H}_{21}\text{OS}$   $[\text{M}+\text{H}]^+$ , 225.1308.; Found, 225.1310.

#### (4-iodophenyl)(4-phenylbutan-2-yl)sulfane (c43)

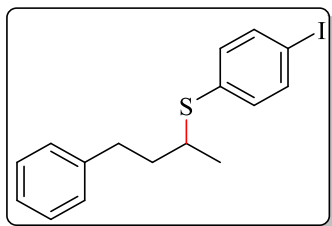

Purification by column chromatography on silica gel (hexane/ethyl acetate = 40:1, v/v) afforded the title compound as a colorless oil (64 mg, 87% yield).

$^1\text{H NMR}$  (400 MHz, Chloroform-*d*)  $\delta$  7.59 (d,  $J = 8.4$  Hz, 2H), 7.31 (t,  $J = 7.3$  Hz, 2H), 7.26 – 7.15 (m, 3H), 7.07 (d,  $J = 8.4$  Hz, 2H), 3.19 (h,  $J = 6.7$  Hz, 1H), 2.89 – 2.69 (m, 2H), 2.00 – 1.77 (m, 2H), 1.33 (d,  $J = 6.7$  Hz, 3H).

$^{13}\text{C NMR}$  (101 MHz, Chloroform-*d*)  $\delta$  141.4, 137.8, 135.4, 133.3, 128.4, 126.0, 91.7, 42.4, 38.1, 33.1, 21.1.

HRMS (ESI)  $m/z$ : Calcd for  $\text{C}_{16}\text{H}_{18}\text{IS}$   $[\text{M}+\text{H}]^+$ , 369.0168.; Found, 369.0169.

#### 2-((4-phenylbutan-2-yl)thio)benzo[*d*]oxazole (c44)

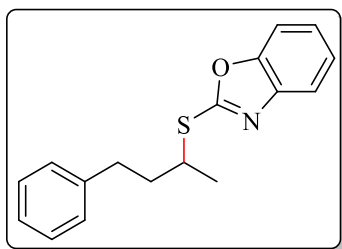

Purification by column chromatography on silica gel (hexane/ethyl acetate = 10:1, v/v) afforded the title compound as a white solid (53 mg, 94% yield). Mp. 141.2 - 143.4 °C.

$^1\text{H NMR}$  (400 MHz, Chloroform-*d*)  $\delta$  7.61 (dd,  $J = 6.0, 3.2$  Hz, 2H), 7.33 – 7.15 (m, 5H), 7.10 (d,  $J = 6.7$  Hz, 2H), 3.99 (h,  $J = 6.8$  Hz, 1H), 2.75 (t,  $J = 8.1$  Hz, 2H), 2.03 (ddt,  $J = 30.4, 15.2, 7.5$  Hz, 2H), 1.49 (d,  $J = 6.7$  Hz, 3H).

$^{13}\text{C NMR}$  (101 MHz, Chloroform-*d*)  $\delta$  149.7, 141.3, 139.4, 128.5, 128.4, 126.0, 122.5, 114.4, 43.4, 38.7, 33.2, 22.0.

HRMS (ESI)  $m/z$ : Calcd for  $\text{C}_{17}\text{H}_{18}\text{NOS}$   $[\text{M}+\text{H}]^+$ , 284.1104.; Found, 284.1106.

#### 2-((4-phenylbutan-2-yl)thio)pyrimidine (c45)

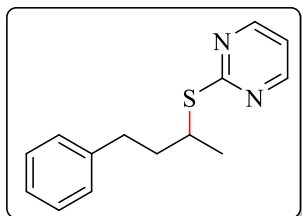

Purification by column chromatography on silica gel (hexane/ethyl acetate = 10:1, v/v) afforded the title compound as a yellow oil (30 mg, 62% yield).

$^1\text{H}$  NMR (400 MHz, Chloroform-*d*)  $\delta$  8.51 (d,  $J = 4.8$  Hz, 2H), 7.32 – 7.26 (m, 2H), 7.24 – 7.17 (m, 3H), 6.95 (t,  $J = 4.9$  Hz, 1H), 3.93 (h,  $J = 6.8$  Hz, 1H), 2.82 (t,  $J = 7.0$  Hz, 2H), 2.16 – 1.92 (m, 2H), 1.50 (d,  $J = 6.8$  Hz, 3H).

$^{13}\text{C}$  NMR (101 MHz, Chloroform-*d*)  $\delta$  172.8, 157.2, 141.8, 134.4, 128.4, 128.3, 125.9, 116.3, 40.2, 38.1, 33.3, 21.2.

HRMS (ESI)  $m/z$ : Calcd for  $\text{C}_{14}\text{H}_{17}\text{N}_2\text{S}$   $[\text{M}+\text{H}]^+$ , 245.1107.; Found, 245.1098.

#### 4-(phenylthio)pentyl 2,2-diphenylacetate (c46)

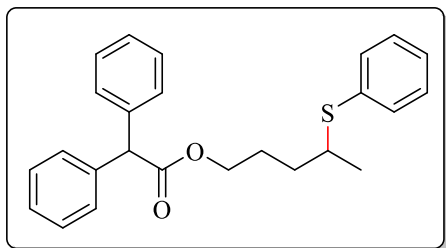

Purification by column chromatography on silica gel (hexane/ethyl acetate = 40:1, v/v) afforded the title compound as a yellow oil (40 mg, 51% yield).

$^1\text{H}$  NMR (400 MHz, Chloroform-*d*)  $\delta$  7.40 (d,  $J = 7.4$  Hz, 2H), 7.36 – 7.31 (m, 8H), 7.31 – 7.23 (m, 5H), 5.04 (s, 1H), 4.18 (t,  $J = 7.7$  Hz, 2H), 3.18 (h,  $J = 6.6$  Hz, 1H), 1.82 (p,  $J = 7.1$  Hz, 2H), 1.57 (ddd,  $J = 31.1, 14.2, 6.8$  Hz, 2H), 1.25 (d,  $J = 6.4$  Hz, 3H).

$^{13}\text{C}$  NMR (101 MHz, Chloroform-*d*)  $\delta$  172.5, 138.7, 134.9, 132.2, 128.9, 128.6, 127.3, 126.9, 64.9, 57.2, 42.9, 32.8, 26.0, 21.2.

HRMS (ESI)  $m/z$ : Calcd for  $\text{C}_{25}\text{H}_{27}\text{O}_2\text{S}$   $[\text{M}+\text{H}]^+$ , 391.1726.; Found, 391.1733.

#### 4-((4-*tert*-butyl)phenyl)thio)pentyl 2,2-diphenylacetate (c47)

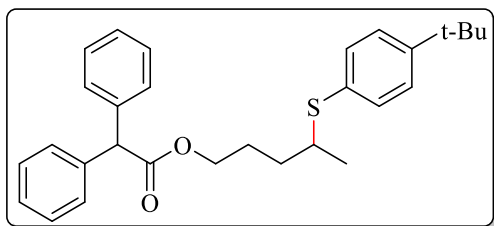

Purification by column chromatography on silica gel (hexane/ethyl acetate = 40:1, v/v) afforded the title compound as a yellow oil (57 mg, 64% yield).

$^1\text{H}$  NMR (400 MHz, Chloroform-*d*)  $\delta$  7.35 (dd,  $J = 2.6, 1.6$  Hz, 4H), 7.34 – 7.32 (m, 8H), 7.31 – 7.28 (m, 2H), 5.04 (s, 1H), 4.19 (td,  $J = 6.5, 3.0$  Hz, 2H), 3.12 (h,  $J = 6.7$  Hz, 1H), 1.89 – 1.67 (m, 2H), 1.67 – 1.41 (m, 2H), 1.34 (s, 9H), 1.24 (d,  $J = 5.3$  Hz, 3H).

$^{13}\text{C}$  NMR (101 MHz, Chloroform-*d*)  $\delta$  172.5, 150.3, 138.7, 132.4, 131.1, 128.6, 127.3, 125.9, 65.0, 57.2, 43.2, 34.5, 32.8, 31.3, 26.0, 21.3.

HRMS (ESI)  $m/z$ : Calcd for  $\text{C}_{29}\text{H}_{35}\text{O}_2\text{S}$   $[\text{M}+\text{H}]^+$ , 447.2352.; Found, 447.2353.

#### 4-((4-fluorophenyl)thio)pentyl 2,2-diphenylacetate (c48)

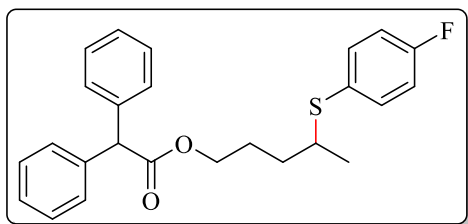

Purification by column chromatography on silica gel (hexane/ethyl acetate = 50:1, v/v) afforded the title compound as a colorless oil (61 mg, 75% yield).

$^1\text{H NMR}$  (400 MHz, Chloroform-*d*)  $\delta$  7.39 (dd,  $J = 8.6, 5.4$  Hz, 2H), 7.37 – 7.32 (m, 8H), 7.32 – 7.27 (m, 2H), 7.01 (t,  $J = 8.6$  Hz, 2H), 5.04 (s, 1H), 4.19 (t,  $J = 6.5$  Hz, 2H), 3.06 (h,  $J = 6.7$  Hz, 1H), 1.82 (p,  $J = 6.7$  Hz, 2H), 1.54 (dtd,  $J = 28.4, 14.9, 14.5, 7.7$  Hz, 2H), 1.22 (d,  $J = 6.7$  Hz, 3H).

$^{13}\text{C NMR}$  (101 MHz, Chloroform-*d*)  $\delta$  172.5, 162.4 (d,  $J = 243.4$  Hz), 138.7, 135.3 (d,  $J = 8.1$  Hz), 129.6, 128.6, 127.3, 115.9 (d,  $J = 21.6$  Hz), 64.9, 57.2, 43.9, 32.7, 26.0, 21.1.

$^{19}\text{F NMR}$  (376 MHz, Chloroform-*d*)  $\delta$  -114.26.

HRMS (ESI)  $m/z$ : Calcd for  $\text{C}_{25}\text{H}_{26}\text{FO}_2\text{S}$   $[\text{M}+\text{H}]^+$ , 409.1632.; Found, 409.1638.

#### 4-((2-fluorophenyl)thio)pentyl 2,2-diphenylacetate (c49)

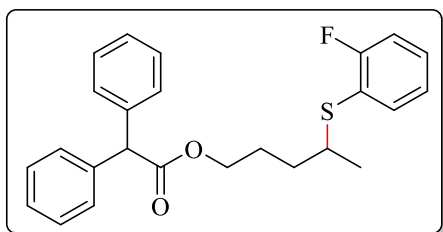

Purification by column chromatography on silica gel (hexane/ethyl acetate = 40:1, v/v) afforded the title compound as a colorless oil (44 mg, 54% yield).

$^1\text{H NMR}$  (400 MHz, Chloroform-*d*)  $\delta$  7.43 (t,  $J = 7.7$  Hz, 1H), 7.38 – 7.31 (m, 8H), 7.31 – 7.24 (m, 3H), 7.09 (t,  $J = 9.2$  Hz, 2H), 5.04 (s, 1H), 4.18 (t,  $J = 7.8$  Hz, 2H), 3.24 (h,  $J = 6.7$  Hz, 1H), 1.83 (p,  $J = 7.0$  Hz, 2H), 1.67 – 1.44 (m, 2H), 1.23 (d,  $J = 6.7$  Hz, 3H).

$^{13}\text{C NMR}$  (101 MHz, Chloroform-*d*)  $\delta$  172.5, 162.5 (d,  $J = 245.5$  Hz), 138.7, 135.2, 129.5 (d,  $J = 8.0$  Hz), 128.6, 127.3, 124.4 (d,  $J = 3.8$  Hz), 121.6 (d,  $J = 18.4$  Hz), 115.8 (d,  $J = 23.2$  Hz), 64.9, 57.2, 42.6 (d,  $J = 2.2$  Hz), 32.9, 25.9, 21.1.

$^{19}\text{F NMR}$  (376 MHz, Chloroform-*d*)  $\delta$  -107.6.

HRMS (ESI)  $m/z$ : Calcd for  $\text{C}_{25}\text{H}_{26}\text{FO}_2\text{S}$   $[\text{M}+\text{H}]^+$ , 409.1632.; Found, 409.1624.

#### 4-((2-(trifluoromethyl)phenyl)thio)pentyl 2,2-diphenylacetate (c50)

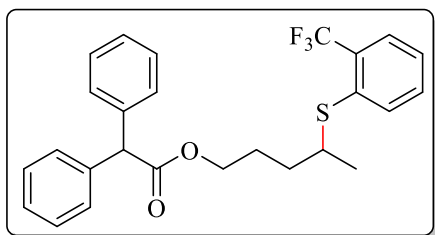

Purification by column chromatography on silica gel (hexane/ethyl acetate = 40:1, v/v) afforded the title compound as a colorless oil (38 mg, 42% yield).

$^1\text{H}$  NMR (400 MHz, Chloroform-*d*)  $\delta$  7.67 (d,  $J = 7.9$  Hz, 1H), 7.51 (d,  $J = 7.9$  Hz, 1H), 7.45 (t,  $J = 7.6$  Hz, 1H), 7.36 – 7.28 (m, 10H), 7.28 – 7.24 (m, 1H), 5.02 (s, 1H), 4.17 (t,  $J = 7.4$  Hz, 2H), 3.30 (h,  $J = 6.6$  Hz, 1H), 1.86 – 1.76 (m, 2H), 1.68 – 1.54 (m, 2H), 1.24 (d,  $J = 6.7$  Hz, 3H).

$^{13}\text{C}$  NMR (101 MHz, Chloroform-*d*)  $\delta$  172.5, 138.6, 135.3, 133.4, 131.7, 129.9 (d,  $J = 251.1$  Hz), 127.3, 126.8 (q,  $J = 6.4$  Hz), 126.4, 64.7, 57.1, 43.6, 32.8, 25.9, 20.8.

$^{19}\text{F}$  NMR (376 MHz, Chloroform-*d*)  $\delta$  -60.33.

HRMS (ESI)  $m/z$ : Calcd for  $\text{C}_{26}\text{H}_{26}\text{F}_3\text{O}_2\text{S}$   $[\text{M}+\text{H}]^+$ , 459.1600.; Found, 459.1596.

#### 4-((4-fluoro-3-methylphenyl)thio)pentyl 2,2-diphenylacetate (c51)

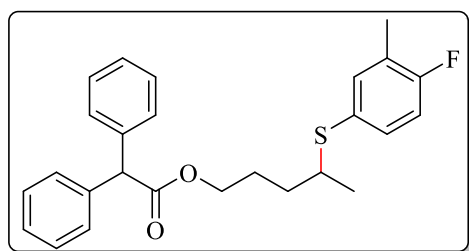

Purification by column chromatography on silica gel (hexane/ethyl acetate = 40:1, v/v) afforded the title compound as a colorless oil (59 mg, 66% yield).

$^1\text{H}$  NMR (600 MHz, Chloroform-*d*)  $\delta$  7.34 – 7.28 (m, 9H), 7.27 – 7.23 (m, 2H), 6.92 (dd,  $J = 9.6, 2.9$  Hz, 1H), 6.81 (td,  $J = 8.4, 2.9$  Hz, 1H), 5.00 (s, 1H), 4.20 – 4.09 (m, 2H), 3.01 (h,  $J = 6.7$  Hz, 1H), 2.39 (s, 3H), 1.83 – 1.75 (m, 2H), 1.61 – 1.41 (m, 2H), 1.16 (d,  $J = 6.7$  Hz, 3H).

$^{13}\text{C}$  NMR (151 MHz, Chloroform-*d*)  $\delta$  172.5, 162.1 (d,  $J = 246.8$  Hz), 143.2 (d,  $J = 7.8$  Hz), 138.7, 135.4 (d,  $J = 8.2$  Hz), 129.2 (d,  $J = 3.2$  Hz), 128.6, 127.3, 117.1 (d,  $J = 21.3$  Hz), 113.3 (d,  $J = 21.3$  Hz), 64.9, 57.2, 43.3, 32.9, 26.0, 21.2, 20.9.

$^{19}\text{F}$  NMR (565 MHz, Chloroform-*d*)  $\delta$  -114.97.

HRMS (ESI)  $m/z$ : Calcd for  $\text{C}_{26}\text{H}_{28}\text{FO}_2\text{S}$   $[\text{M}+\text{H}]^+$ , 423.1789.; Found, 423.1792.

#### 4-((2,4-dimethylphenyl)thio)pentyl 2,2-diphenylacetate (c52)

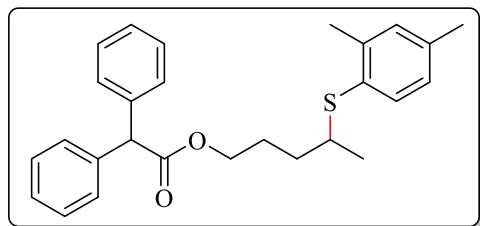

Purification by column chromatography on silica gel (hexane/ethyl acetate = 40:1, v/v) afforded the title compound as a yellow oil (38 mg, 46% yield).

$^1\text{H}$  NMR (400 MHz, Chloroform-*d*)  $\delta$  7.37 – 7.32 (m, 8H), 7.30 – 7.26 (m, 3H), 7.05 (s, 1H), 6.96 (d,  $J = 8.1$  Hz, 1H), 5.03 (s, 1H), 4.17 (t,  $J = 5.4$  Hz, 2H), 3.10 (h,  $J = 6.6$  Hz, 1H), 2.40 (s, 3H), 2.31 (s, 3H), 1.81 (dt,  $J = 14.9, 7.2$  Hz, 2H), 1.68 – 1.44 (m, 2H), 1.22 (d,  $J = 6.7$  Hz, 3H).

$^{13}\text{C}$  NMR (101 MHz, Chloroform-*d*)  $\delta$  172.5, 140.1, 138.7, 137.0, 133.0, 131.2, 130.7, 128.6, 128.6, 127.3, 127.1, 65.0, 57.2, 42.8, 33.0, 26.0, 21.0, 20.9.

HRMS (ESI)  $m/z$ : Calcd for  $\text{C}_{27}\text{H}_{31}\text{O}_2\text{S}$   $[\text{M}+\text{H}]^+$ , 419.2039.; Found, 419.2043.

#### 4-(naphthalen-1-ylthio)pentyl 2,2-diphenylacetate (c53)

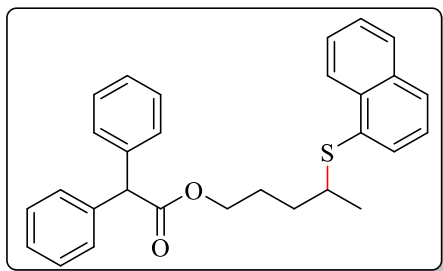

Purification by column chromatography on silica gel (hexane/ethyl acetate = 40:1, v/v) afforded the title compound as a yellow oil (48 mg, 54% yield).

$^1\text{H NMR}$  (400 MHz, Chloroform-*d*)  $\delta$  7.86 – 7.80 (m, 2H), 7.77 (dd,  $J = 7.8, 3.7$  Hz, 2H), 7.54 – 7.42 (m, 3H), 7.35 – 7.27 (m, 9H), 7.27 – 7.23 (m, 1H), 5.00 (s, 1H), 4.18 (t,  $J = 6.5$  Hz, 2H), 3.31 (h,  $J = 6.7$  Hz, 1H), 1.85 (p,  $J = 7.1$  Hz, 2H), 1.70 – 1.44 (m, 2H), 1.29 (d,  $J = 6.7$  Hz, 3H).

$^{13}\text{C NMR}$  (101 MHz, Chloroform-*d*)  $\delta$  172.5, 138.7, 133.7, 132.5, 132.2, 130.5, 129.6, 128.6, 128.3, 127.7, 127.3, 127.3, 126.5, 126.0, 64.9, 57.1, 42.9, 32.9, 26.0, 21.2.

HRMS (ESI)  $m/z$ : Calcd for  $\text{C}_{29}\text{H}_{29}\text{O}_2\text{S}$   $[\text{M}+\text{H}]^+$ , 441.1883.; Found, 441.1884.

#### (10*R*,13*S*,17*S*)-10,13-dimethyl-3-oxo-6,7,8,9,10,11,12,13,14,15,16,17-dodecahydro-3*H*-cyclopenta[*a*]phenanthren-17-yl 10-((4-bromophenyl)thio)undecanoate (c55)

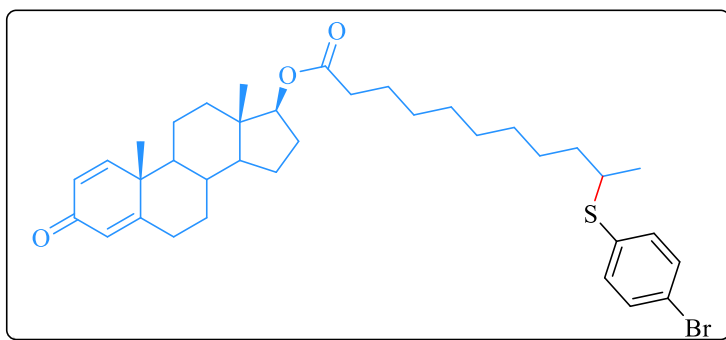

Purification by column chromatography on silica gel (hexane/ethyl acetate = 30:1, v/v) afforded the title compound as a white oil (79 mg, 62% yield).

$^1\text{H NMR}$  (400 MHz, Methanol-*d*<sub>4</sub>)  $\delta$  7.46 (d,  $J = 8.5$  Hz, 2H), 7.30 (d,  $J = 6.6$  Hz, 2H), 7.28 (dd,  $J = 7.8, 1.3$  Hz, 1H), 6.22 (dd,  $J = 10.1, 2.0$  Hz, 1H), 6.08 (t,  $J = 1.6$  Hz, 1H), 4.61 (dd,  $J = 9.2, 7.5$  Hz, 1H), 3.27 (h,  $J = 6.6$  Hz, 1H), 2.59 (td,  $J = 13.5, 5.2$  Hz, 1H), 2.46 – 2.37 (m, 1H), 2.32 (t,  $J = 7.9$  Hz, 2H), 2.23 – 2.10 (m, 1H), 2.07 – 1.99 (m, 1H), 1.77 (dt,  $J = 13.4, 10.5$  Hz, 4H), 1.74 – 1.56 (m, 5H), 1.56 – 1.39 (m, 5H), 1.35 – 1.30 (m, 8H), 1.29 (s, 3H), 1.27 (d,  $J = 6.7$  Hz, 3H), 1.15 – 1.00 (m, 3H), 0.92 (s, 3H).

$^{13}\text{C NMR}$  (101 MHz, Methanol-*d*<sub>4</sub>)  $\delta$  187.2, 174.1, 171.9, 157.9, 133.9, 133.0, 131.6, 126.2, 122.7, 119.9, 82.3, 52.7, 49.7, 43.9, 42.9, 42.6, 36.5, 36.3, 35.1, 33.9, 33.1, 32.4, 28.9, 28.7, 28.6, 27.1, 26.5, 24.8, 23.2, 22.2, 20.2, 17.7, 11.2.

HRMS (ESI)  $m/z$ : Calcd for  $\text{C}_{36}\text{H}_{50}\text{BrO}_3\text{S}$   $[\text{M}+\text{H}]^+$ , 643.2644.; Found, 643.2636.



**3-((4-bromophenyl)thio)butyl 4-(*N,N*-dipropylsulfamoyl)benzoate (c56)**

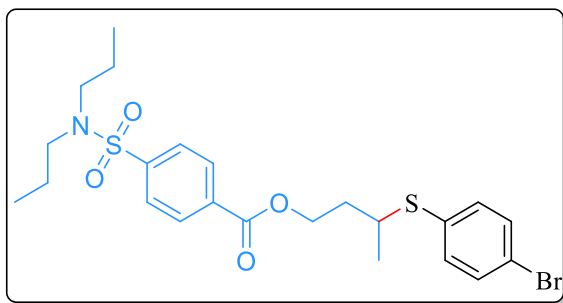

Purification by column chromatography on silica gel (hexane/ethyl acetate = 30:1, v/v) afforded the title compound as a yellow solid (74 mg, 70% yield). Mp. 78.3 - 80.1 °C.

<sup>1</sup>H NMR (600 MHz, Chloroform-*d*) δ 8.11 (d, *J* = 8.4 Hz, 2H), 7.88 (d, *J* = 8.3 Hz, 2H), 7.39 (d, *J* = 8.4 Hz, 2H), 7.28 (d, *J* = 8.5 Hz, 2H), 4.50 (td, *J* = 6.4, 2.1 Hz, 2H), 3.35 (h, *J* = 6.8 Hz, 1H), 3.14 – 3.08 (m, 4H), 2.03 (qd, *J* = 14.5, 7.3 Hz, 2H), 1.56 (h, *J* = 7.4 Hz, 4H), 1.38 (d, *J* = 6.8 Hz, 3H), 0.87 (t, *J* = 7.4 Hz, 6H).

<sup>13</sup>C NMR (151 MHz, Chloroform-*d*) δ 165.1, 144.4, 134.1, 133.6, 133.4, 132.0, 130.2, 127.0, 121.4, 63.2, 50.0, 40.8, 35.5, 22.0, 21.3, 11.2.

HRMS (ESI) *m/z*: Calcd for C<sub>23</sub>H<sub>31</sub>BrNO<sub>4</sub>S<sub>2</sub> [M+H]<sup>+</sup>, 530.0853.; Found, 530.0859.

**8-((4-bromophenyl)thio)nonyl 2-(1-(4-chlorobenzoyl)-5-methoxy-2-methyl-1*H*-indol-3-yl)acetate (c57)**

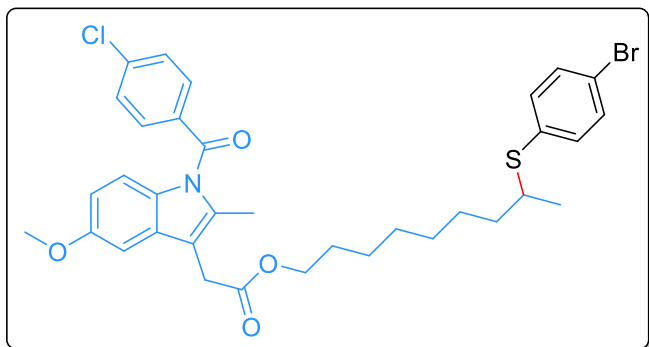

Purification by column chromatography on silica gel (hexane/ethyl acetate = 30:1, v/v) afforded the title compound as a green oil (85 mg, 63% yield).

<sup>1</sup>H NMR (600 MHz, Chloroform-*d*) δ 7.66 (d, *J* = 8.4 Hz, 2H), 7.46 (d, *J* = 8.4 Hz, 2H), 7.39 (d, *J* = 8.4 Hz, 2H), 7.23 (d, *J* = 8.4 Hz, 2H), 6.97 (d, *J* = 2.3 Hz, 1H), 6.87 (d, *J* = 9.0 Hz, 1H), 6.66 (dd, *J* = 9.0, 2.3 Hz, 1H), 4.09 (t, *J* = 6.7 Hz, 2H), 3.83 (s, 3H), 3.65 (s, 2H), 3.16 (h, *J* = 6.7 Hz, 1H), 2.39 (s, 3H), 1.59 (dt, *J* = 19.2, 6.8 Hz, 3H), 1.47 (td, *J* = 14.4, 13.2, 5.9 Hz, 1H), 1.42 – 1.37 (m, 2H), 1.31 – 1.26 (m, 2H), 1.25 (d, *J* = 6.6 Hz, 3H), 1.24 – 1.20 (m, 4H).

<sup>13</sup>C NMR (151 MHz, Chloroform-*d*) δ 171.0, 168.3, 156.0, 139.2, 135.9, 134.8, 133.9, 133.3, 131.8, 131.2, 130.8, 130.7, 129.1, 120.6, 114.9, 112.7, 111.6, 101.3, 65.1, 55.7, 43.5, 36.5, 30.4, 29.4, 29.3, 29.1, 28.6, 27.0, 25.8, 21.0, 13.4.

HRMS (ESI) *m/z*: Calcd for C<sub>34</sub>H<sub>38</sub>BrClNO<sub>4</sub>S [M+H]<sup>+</sup>, 672.1369.; Found, 672.1363.

**5-((4-bromophenyl)thio)hexyl 2-(3-cyano-4-isobutoxyphenyl)-4-methylthiazole-5-carboxylate (c58)**

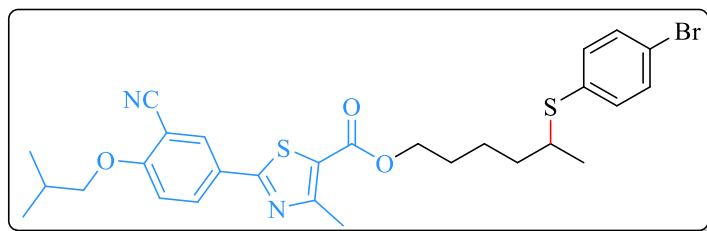

Purification by column chromatography on silica gel (hexane/ethyl acetate = 20:1, v/v) afforded the title compound as a brown solid (77 mg, 66% yield). Mp. 48.7 – 49.9 °C.

$^1\text{H}$  NMR (400 MHz, Chloroform-*d*)  $\delta$  8.15 (d,  $J$  = 2.3 Hz, 1H), 8.05 (dd,  $J$  = 8.9, 2.3 Hz, 1H), 7.38 (d,  $J$  = 8.4 Hz, 2H), 7.23 (d,  $J$  = 8.5 Hz, 2H), 6.99 (d,  $J$  = 8.9 Hz, 1H), 4.28 (t,  $J$  = 6.5 Hz, 2H), 3.89 (d,  $J$  = 6.5 Hz, 2H), 3.20 (h,  $J$  = 6.4, 6.0 Hz, 1H), 2.75 (s, 3H), 2.19 (dp,  $J$  = 13.3, 6.7 Hz, 1H), 1.77 – 1.55 (m, 6H), 1.28 (d,  $J$  = 6.7 Hz, 3H), 1.08 (d,  $J$  = 6.7 Hz, 6H).

$^{13}\text{C}$  NMR (101 MHz, Chloroform-*d*)  $\delta$  167.2, 162.5, 162.0, 161.1, 134.4, 133.5, 132.5, 132.0, 131.9, 126.0, 121.8, 120.8, 115.4, 112.6, 102.9, 75.7, 65.1, 43.3, 36.0, 28.5, 28.1, 23.4, 21.1, 19.0, 17.5.

HRMS (ESI)  $m/z$ : Calcd for  $\text{C}_{28}\text{H}_{32}\text{BrN}_2\text{O}_3\text{S}_2$   $[\text{M}+\text{H}]^+$ , 589.1014.; Found, 589.1011.

**4-((4-bromophenyl)thio)pentyl ((benzyloxy)carbonyl)phenylalaninate (c59)**

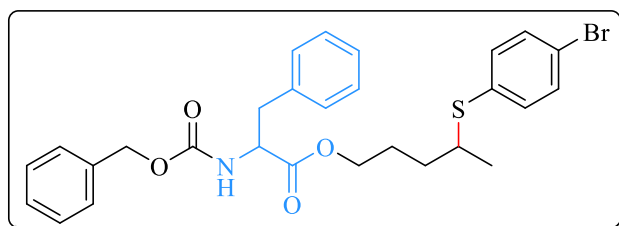

Purification by column chromatography on silica gel (hexane/ethyl acetate = 20:1, v/v) afforded the title compound as a colorless oil (79 mg, 71% yield).

$^1\text{H}$  NMR (600 MHz, Chloroform-*d*)  $\delta$  7.40 (d,  $J$  = 8.6 Hz, 2H), 7.33 (h,  $J$  = 7.6, 7.1 Hz, 5H), 7.24 (dd,  $J$  = 13.0, 8.0 Hz, 5H), 7.09 (d,  $J$  = 6.7 Hz, 2H), 5.24 (d,  $J$  = 8.3 Hz, 1H), 5.09 (d,  $J$  = 4.9 Hz, 2H), 4.63 (q,  $J$  = 6.2 Hz, 1H), 4.09 (ddt,  $J$  = 28.9, 16.8, 8.2 Hz, 2H), 3.10 (dtd,  $J$  = 33.8, 15.5, 14.4, 7.0 Hz, 3H), 1.74 (p,  $J$  = 7.2 Hz, 2H), 1.56 – 1.46 (m, 2H), 1.25 (d,  $J$  = 6.7 Hz, 3H).

$^{13}\text{C}$  NMR (101 MHz, Chloroform-*d*)  $\delta$  171.6, 155.7, 136.3, 135.8, 134.1, 133.7, 132.0, 129.3, 128.6, 128.6, 128.2, 128.1, 127.2, 121.1, 67.0, 65.1, 54.9, 43.2, 38.4, 32.7, 25.9, 21.1.

HRMS (ESI)  $m/z$ : Calcd for  $\text{C}_{28}\text{H}_{31}\text{BrNO}_4\text{S}$   $[\text{M}+\text{H}]^+$ , 558.1135.; Found, 558.1137.

***N*-4-((4-bromophenyl)thio)pentyl)-4-(5-(*p*-tolyl)-3-(trifluoromethyl)-1*H*-pyrazol-1-yl)benzenesulfonamide (c60)**

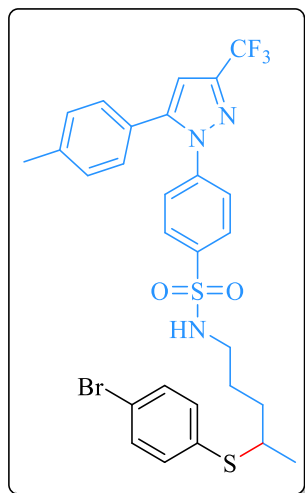

Purification by column chromatography on silica gel (hexane/ethyl acetate = 20:1, v/v) afforded the title compound as a brown solid (82 mg, 64% yield).

<sup>1</sup>H NMR (600 MHz, Chloroform-*d*) δ 7.83 (d, *J* = 8.7 Hz, 2H), 7.47 (d, *J* = 8.6 Hz, 2H), 7.39 (d, *J* = 8.4 Hz, 2H), 7.21 (d, *J* = 6.4 Hz, 2H), 7.17 (d, *J* = 7.8 Hz, 2H), 7.10 (d, *J* = 8.1 Hz, 2H), 6.75 (s, 1H), 4.61 (t, *J* = 6.3 Hz, 1H), 3.13 (h, *J* = 6.7 Hz, 1H), 3.00 – 2.93 (m, 2H), 2.38 (s, 3H), 1.72 – 1.61 (m, 2H), 1.53 (dddd, *J* = 14.1, 12.3, 10.0, 6.3 Hz, 2H), 1.23 (d, *J* = 6.7 Hz, 3H).

<sup>13</sup>C NMR (151 MHz, Chloroform-*d*) δ 168.1, 145.3, 144.1 (q, *J* = 38.4 Hz), 142.5, 139.8, 139.4, 134.4, 134.0, 133.6, 132.6, 132.0, 129.8, 128.7, 128.1, 125.7, 125.6, 123.6, 121.1 (q, *J* = 269.2 Hz), 121.1, 106.3, 43.0, 43.0, 33.3, 27.0, 21.3, 21.1.

<sup>19</sup>F NMR (565 MHz, Chloroform-*d*) δ -62.42.

HRMS (ESI) *m/z*: Calcd for C<sub>28</sub>H<sub>28</sub>BrF<sub>3</sub>N<sub>3</sub>O<sub>2</sub>S<sub>2</sub> [M+H]<sup>+</sup>, 640.0735.; Found, 640.0728.

**(10*R*,13*R*)-17-((*R*)-2,5-dimethylhexyl)-10,13-dimethyl-2,3,4,7,8,9,10,11,12,13,14,15,16,17-tetradecahydro-1*H*-cyclopenta[*a*]phenanthren-3-yl 4-((4-bromophenyl)thio)pentanoate (c61)**

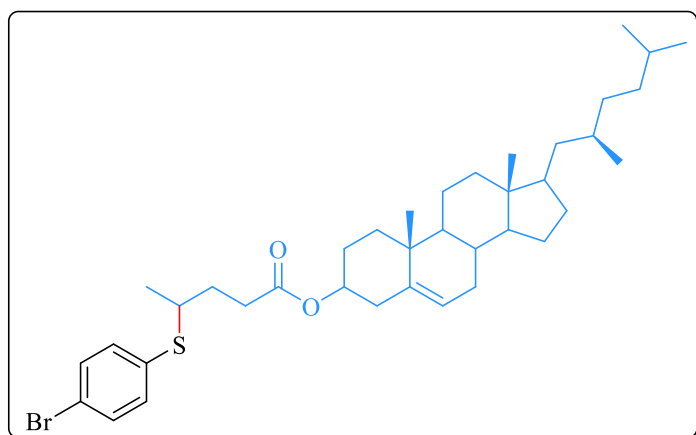

Purification by column chromatography on silica gel (hexane/ethyl acetate = 40:1, v/v) afforded the title compound as a brown oil (97 mg, 74% yield).

<sup>1</sup>H NMR (400 MHz, Chloroform-*d*) δ 7.41 (d, *J* = 8.5 Hz, 2H), 7.27 (d, *J* = 8.9 Hz, 2H), 5.38 (d, *J* = 5.9 Hz, 1H), 4.62 (qd, *J* = 10.9, 8.3, 4.1 Hz, 1H), 3.22 (h, *J* = 6.7 Hz, 1H), 2.47 (t, *J* = 7.4 Hz, 2H), 2.32

(t,  $J = 4.6$  Hz, 3H), 2.06 – 1.93 (m, 3H), 1.93 – 1.77 (m, 6H), 1.65 – 1.43 (m, 9H), 1.38 – 1.33 (m, 3H), 1.29 (d,  $J = 6.8$  Hz, 3H), 1.20 – 1.07 (m, 6H), 1.03 (s, 3H), 0.93 (d,  $J = 6.4$  Hz, 3H), 0.89 (d,  $J = 1.8$  Hz, 3H), 0.87 (d,  $J = 1.8$  Hz, 3H), 0.69 (s, 3H).

$^{13}\text{C}$  NMR (101 MHz, Chloroform-*d*)  $\delta$  172.4, 139.6, 136.7, 133.7, 131.9, 122.7, 121.1, 74.1, 56.7, 56.2, 50.1, 43.0, 42.3, 39.8, 39.5, 38.2, 37.0, 36.6, 36.2, 35.8, 31.9, 31.9, 31.6, 28.2, 28.0, 27.8, 26.5, 24.3, 23.9, 22.8, 22.6, 21.1, 19.3, 18.8, 11.9.

HRMS (ESI)  $m/z$ : Calcd for  $\text{C}_{38}\text{H}_{58}\text{BrO}_2\text{S}$   $[\text{M}+\text{H}]^+$ , 659.3321.; Found, 659.3329.

#### 4-((4-bromophenyl)thio)pentyl 6-(3-(adamantan-1-yl)-4-methoxyphenyl)-2-naphthoate (c62)

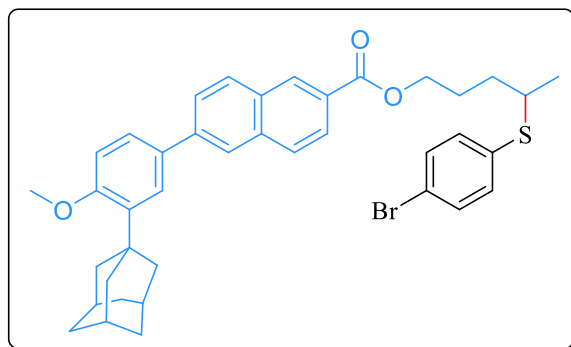

Purification by column chromatography on silica gel (hexane/ethyl acetate = 30:1, v/v) afforded the title compound as a white solid (90 mg, 67% yield). Mp. 112.0 - 114.7 °C.

$^1\text{H}$  NMR (400 MHz, Chloroform-*d*)  $\delta$  8.63 (s, 1H), 8.09 – 8.04 (m, 2H), 8.02 (d,  $J = 8.5$  Hz, 1H), 7.96 (d,  $J = 8.7$  Hz, 1H), 7.85 (dd,  $J = 8.6, 1.8$  Hz, 1H), 7.67 (d,  $J = 2.4$  Hz, 1H), 7.58 (dd,  $J = 8.4, 2.3$  Hz, 1H), 7.41 (d,  $J = 8.5$  Hz, 2H), 7.30 (d,  $J = 8.5$  Hz, 2H), 7.02 (d,  $J = 8.5$  Hz, 1H), 4.43 (t,  $J = 6.4$  Hz, 2H), 3.93 (s, 3H), 3.31 (h,  $J = 6.6$  Hz, 1H), 2.27 – 2.22 (m, 6H), 2.16 (td,  $J = 5.1, 2.4$  Hz, 3H), 2.03 (p,  $J = 7.1$  Hz, 2H), 1.89 – 1.70 (m, 8H), 1.37 (d,  $J = 6.7$  Hz, 3H).

$^{13}\text{C}$  NMR (101 MHz, Chloroform-*d*)  $\delta$  166.8, 159.0, 141.4, 139.0, 136.0, 134.2, 133.7, 132.6, 132.0, 131.3, 130.8, 129.8, 128.3, 127.1, 126.6, 126.0, 125.8, 125.6, 124.8, 121.0, 112.2, 64.7, 55.2, 43.2, 40.7, 37.3, 37.2, 33.0, 29.2, 26.3, 21.1.

HRMS (ESI)  $m/z$ : Calcd for  $\text{C}_{39}\text{H}_{42}\text{BrO}_3\text{S}$   $[\text{M}+\text{H}]^+$ , 671.2019.; Found, 671.2026.

#### benzyl (2R)-2-(((benzyloxy)carbonyl)amino)-3-(4-(3-((4-bromophenyl)thio)butoxy)phenyl)propanoate (c63)

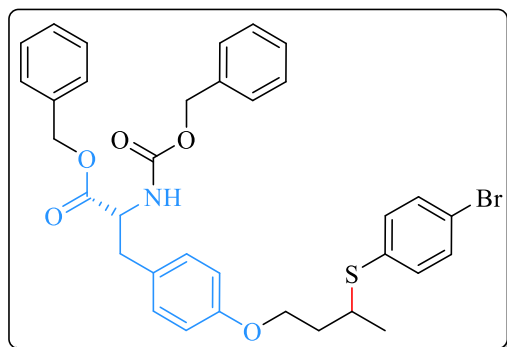

Purification by column chromatography on silica gel (hexane/ethyl acetate = 20:1, v/v) afforded the title compound as a yellow oil (94 mg, 72% yield).

$^1\text{H}$  NMR (400 MHz, Chloroform-*d*)  $\delta$  7.41 (d,  $J$  = 8.5 Hz, 2H), 7.39 – 7.31 (m, 10H), 7.29 (d,  $J$  = 8.4 Hz, 2H), 6.93 (d,  $J$  = 8.1 Hz, 2H), 6.74 (d,  $J$  = 8.5 Hz, 2H), 5.30 (d,  $J$  = 8.3 Hz, 1H), 5.23 – 5.13 (m, 4H), 4.75 – 4.66 (m, 1H), 4.15 – 3.99 (m, 2H), 3.49 (h,  $J$  = 6.8 Hz, 1H), 3.15 – 3.02 (m, 2H), 2.04 (qd,  $J$  = 14.2, 7.7 Hz, 2H), 1.38 (d,  $J$  = 6.8 Hz, 3H).

$^{13}\text{C}$  NMR (101 MHz, Chloroform-*d*)  $\delta$  171.5, 157.9, 155.7, 136.3, 135.2, 134.1, 133.5, 132.0, 130.4, 128.6, 128.6, 128.5, 128.2, 128.1, 127.7, 123.6, 121.0, 114.6, 67.2, 67.0, 65.1, 55.0, 40.4, 37.3, 36.3, 21.4.

HRMS (ESI)  $m/z$ : Calcd for  $\text{C}_{34}\text{H}_{35}\text{BrNO}_5\text{S}$   $[\text{M}+\text{H}]^+$ , 650.1399.; Found, 650.1393.

#### 4,4,5,5-tetramethyl-2-(4-((5-(phenylthio)hexyl)oxy)phenyl)-1,3,2-dioxaborolane (c64)

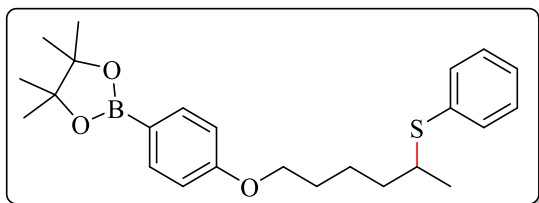

Purification by column chromatography on silica gel (hexane/ethyl acetate = 50:1, v/v) afforded the title compound as a yellow oil (50 mg, 60% yield).

$^1\text{H}$  NMR (400 MHz, Chloroform-*d*)  $\delta$  7.74 (d,  $J$  = 8.6 Hz, 2H), 7.39 (d,  $J$  = 7.0 Hz, 2H), 7.31 – 7.17 (m, 3H), 6.87 (d,  $J$  = 8.6 Hz, 2H), 3.97 (t,  $J$  = 6.4 Hz, 2H), 3.23 (h,  $J$  = 6.5 Hz, 1H), 1.87 – 1.73 (m, 2H), 1.64 – 1.38 (m, 4H), 1.33 (s, 12H), 1.29 (d,  $J$  = 6.7 Hz, 3H).

$^{13}\text{C}$  NMR (101 MHz, Chloroform-*d*)  $\delta$  161.6, 136.5, 135.2, 132.1, 128.8, 126.7, 115.2, 113.8, 83.5, 67.4, 43.3, 36.3, 29.0, 24.8, 23.5, 21.1.

HRMS (ESI)  $m/z$ : Calcd for  $\text{C}_{24}\text{H}_{34}\text{BO}_3\text{S}$   $[\text{M}+\text{H}]^+$ , 413.2321.; Found, 413.2316.

#### diethyl 3-(((4-bromophenyl)thio)methyl)-4-methylcyclopentane-1,1-dicarboxylate (c65)

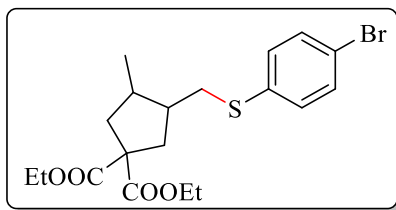

Purification by column chromatography on silica gel (hexane/ethyl acetate = 100:1, v/v) afforded the title compound as a brown oil (55 mg, 64% yield).

$^1\text{H}$  NMR (400 MHz, Chloroform-*d*)  $\delta$  7.39 (d,  $J$  = 8.5 Hz, 2H), 7.19 (d,  $J$  = 8.5 Hz, 2H), 4.17 (qd,  $J$  = 7.1, 5.3 Hz, 4H), 2.94 (dd,  $J$  = 12.3, 6.2 Hz, 1H), 2.78 (dd,  $J$  = 12.2, 7.9 Hz, 1H), 2.45 (dt,  $J$  = 13.5, 6.3 Hz, 2H), 2.35 – 2.10 (m, 3H), 2.03 (dd,  $J$  = 13.8, 5.4 Hz, 1H), 1.23 (td,  $J$  = 7.1, 5.0 Hz, 6H), 0.93 (d,  $J$  = 6.8 Hz, 3H).

$^{13}\text{C}$  NMR (101 MHz, Chloroform-*d*)  $\delta$  172.6, 136.0, 131.9, 130.8, 119.7, 67.9, 61.5, 58.8, 41.7, 41.2, 38.1, 35.8, 34.7, 25.6, 14.7, 14.0.

HRMS (ESI)  $m/z$ : Calcd for  $\text{C}_{19}\text{H}_{26}\text{BrO}_4\text{S}$   $[\text{M}+\text{H}]^+$ , 431.0711.; Found, 431.0716.

#### (4-bromophenyl)((2,2,4-trimethylcyclohex-3-en-1-yl)methyl)sulfane (c66)

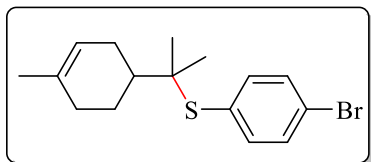

Purification by column chromatography on silica gel (hexane) afforded the title compound as a colorless oil (23 mg, 35% yield).

$^1\text{H}$  NMR (400 MHz, Chloroform-*d*)  $\delta$  7.45 (d,  $J$  = 8.4 Hz, 2H), 7.37 (d,  $J$  = 8.4 Hz, 2H), 5.38 (s, 1H), 2.22 – 2.06 (m, 2H), 2.00 (d,  $J$  = 7.7 Hz, 2H), 1.98 – 1.86 (m, 1H), 1.66 (s, 3H), 1.57 – 1.50 (m, 1H), 1.43 – 1.28 (m, 1H), 1.23 (s, 3H), 1.18 (s, 3H).

$^{13}\text{C}$  NMR (101 MHz, Chloroform-*d*)  $\delta$  139.2, 134.1, 131.6, 131.5, 123.4, 120.7, 53.1, 42.8, 31.2, 27.2, 27.2, 25.1, 24.8, 23.3.

HRMS (ESI)  $m/z$ : Calcd for  $\text{C}_{16}\text{H}_{22}\text{BrS}$   $[\text{M}+\text{H}]^+$ , 327.0600.; Found, 327.0591.

#### phenyl(4-phenylbutan-2-yl)sulfane (c67)

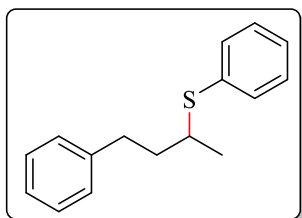

Purification by column chromatography on silica gel (hexane/ethyl acetate = 100:1, v/v) afforded the title compound as a colorless oil (32 mg, 67% yield).

$^1\text{H}$  NMR (400 MHz, Chloroform-*d*)  $\delta$  7.39 (d,  $J$  = 7.0 Hz, 2H), 7.34 – 7.23 (m, 5H), 7.20 (d,  $J$  = 6.7 Hz, 2H), 3.23 (h,  $J$  = 6.7 Hz, 1H), 2.90 – 2.74 (m, 2H), 2.03 – 1.78 (m, 2H), 1.35 (d,  $J$  = 6.7 Hz, 3H).

$^{13}\text{C}$  NMR (101 MHz, Chloroform-*d*)  $\delta$  141.7, 135.1, 132.0, 128.8, 128.5, 128.4, 126.7, 125.9, 42.6, 38.2, 33.2, 21.2.

HRMS (ESI)  $m/z$ : Calcd for  $\text{C}_{16}\text{H}_{19}\text{S}$   $[\text{M}+\text{H}]^+$ , 243.1202.; Found, 243.1209.

#### 1-bromo-4-((4-phenylbutan-2-yl)sulfonyl)benzene (c1-I)

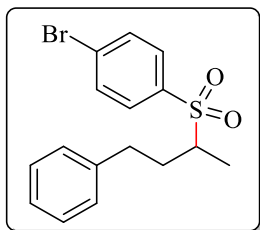

Purification by column chromatography on silica gel (hexane/ethyl acetate = 10:1, v/v) afforded the title compound as a colorless oil (70 mg, 99% yield).

$^1\text{H}$  NMR (400 MHz, Chloroform-*d*)  $\delta$  7.76 – 7.63 (m, 4H), 7.28 (t,  $J$  = 7.2 Hz, 2H), 7.21 (t,  $J$  = 7.3 Hz, 1H), 7.11 (d,  $J$  = 7.1 Hz, 2H), 3.02 (ddp,  $J$  = 10.4, 6.9, 3.5 Hz, 1H), 2.84 (ddd,  $J$  = 14.2, 9.2, 5.3 Hz, 1H), 2.66 – 2.54 (m, 1H), 2.36 – 2.23 (m, 1H), 1.80 – 1.66 (m, 1H), 1.33 (d,  $J$  = 6.9 Hz, 3H).

$^{13}\text{C}$  NMR (101 MHz, Chloroform-*d*)  $\delta$  140.0, 136.2, 132.4, 130.5, 129.0, 128.6, 128.3, 126.4, 59.2, 32.4, 30.7, 13.2.

HRMS (ESI)  $m/z$ : Calcd for  $\text{C}_{16}\text{H}_{18}\text{BrO}_2\text{S}$   $[\text{M}+\text{H}]^+$ , 355.0186.; Found, 355.0190.

**(4-bromophenyl)(imino)(4-phenylbutan-2-yl)- $\lambda^6$ -sulfanone (c1-II)**

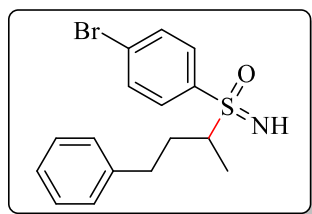

Purification by column chromatography on silica gel (hexane/ethyl acetate = 10:1, v/v) afforded the title compound as a colorless oil (56 mg, 79% yield).

$^1\text{H}$  NMR (400 MHz, Chloroform-*d*)  $\delta$  7.80 – 7.70 (m, 2H), 7.65 (dd,  $J$  = 8.6, 2.3 Hz, 2H), 7.26 (t,  $J$  = 7.7 Hz, 2H), 7.20 (d,  $J$  = 7.2 Hz, 1H), 7.09 (t,  $J$  = 6.5 Hz, 2H), 3.10 – 2.99 (m, 1H), 2.80 (ddt,  $J$  = 13.7, 9.0, 3.9 Hz, 2H), 2.64 – 2.21 (m, 2H), 1.76 – 1.61 (m, 1H), 1.33 (t,  $J$  = 7.2 Hz, 3H).

$^{13}\text{C}$  NMR (101 MHz, Chloroform-*d*)  $\delta$  140.1 (d,  $J$  = 3.8 Hz), 139.1, 132.2, 130.9 (d,  $J$  = 2.9 Hz), 128.6, 128.3, 126.3, 60.2, 32.6 (d,  $J$  = 7.2 Hz), 31.1 (d,  $J$  = 30.9 Hz), 13.4 (d,  $J$  = 18.9 Hz).

HRMS (ESI)  $m/z$ : Calcd for  $\text{C}_{16}\text{H}_{19}\text{BrNOS}$   $[\text{M}+\text{H}]^+$ , 354.0345.; Found, 354.0336.

**phenyl(6-(4-(3,3,3-trifluoroprop-1-en-2-yl)phenoxy)hexan-2-yl)sulfane (c64-I)**

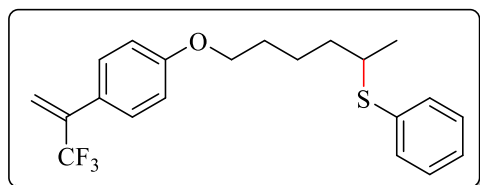

Purification by column chromatography on silica gel (hexane/ethyl acetate = 100:1, v/v) afforded the title compound as a yellow oil (58 mg, 78% yield).

$^1\text{H}$  NMR (400 MHz, Chloroform-*d*)  $\delta$  7.41 (dd,  $J$  = 8.2, 5.0 Hz, 4H), 7.34 – 7.21 (m, 3H), 6.90 (d,  $J$  = 8.5 Hz, 2H), 5.88 (s, 1H), 5.71 (s, 1H), 3.98 (t,  $J$  = 6.5 Hz, 2H), 3.25 (h,  $J$  = 6.5 Hz, 1H), 1.82 (h,  $J$  = 7.0, 6.5 Hz, 2H), 1.73 – 1.52 (m, 4H), 1.31 (d,  $J$  = 6.7 Hz, 3H).

$^{13}\text{C}$  NMR (101 MHz, Chloroform-*d*)  $\delta$  159.6, 135.2, 133.8, 132.1, 128.8, 128.6, 128.5 (d,  $J$  = 6.8 Hz), 126.8, 125.9, 123.5 (d,  $J$  = 273.9 Hz), 118.7 (q,  $J$  = 5.7 Hz), 114.5, 67.7, 43.3, 36.2, 29.0, 23.5, 21.1.

$^{19}\text{F}$  NMR (376 MHz, Chloroform-*d*)  $\delta$  -64.77.

HRMS (ESI)  $m/z$ : Calcd for  $\text{C}_{21}\text{H}_{24}\text{F}_3\text{OS}$   $[\text{M}+\text{H}]^+$ , 381.1494.; Found, 381.1487.

**1-(4-((5-(phenylthio)hexyl)oxy)phenyl)piperidine (c64-II)**

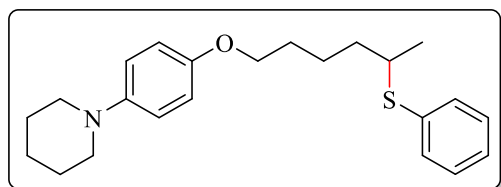

Purification by column chromatography on silica gel (hexane/ethyl acetate = 20:1, v/v) afforded the title compound as a brown oil (30 mg, 40% yield).

$^1\text{H}$  NMR (400 MHz, Chloroform-*d*)  $\delta$  7.40 (d,  $J$  = 7.6 Hz, 2H), 7.32 – 7.21 (m, 3H), 6.93 (d,  $J$  = 8.5 Hz, 2H), 6.82 (d,  $J$  = 8.6 Hz, 2H), 3.91 (t,  $J$  = 6.4 Hz, 2H), 3.24 (h,  $J$  = 6.4 Hz, 1H), 3.03 (t,  $J$  = 5.3 Hz, 4H), 1.80 – 1.70 (m, 6H), 1.69 – 1.51 (m, 6H), 1.30 (d,  $J$  = 6.7 Hz, 3H).

---

<sup>13</sup>C NMR (101 MHz, Chloroform-*d*) δ 135.3, 132.1, 128.8, 126.7, 118.8, 115.1, 68.1, 52.4, 43.3, 36.3, 29.2, 26.1, 24.1, 23.6, 21.1.

HRMS (ESI) *m/z*: Calcd for C<sub>23</sub>H<sub>32</sub>NOS [M+H]<sup>+</sup>, 370.2199.; Found, 370.2195.



#### 4. $^1\text{H}$ , $^{13}\text{C}$ , $^{19}\text{F}$ spectra of target compounds.

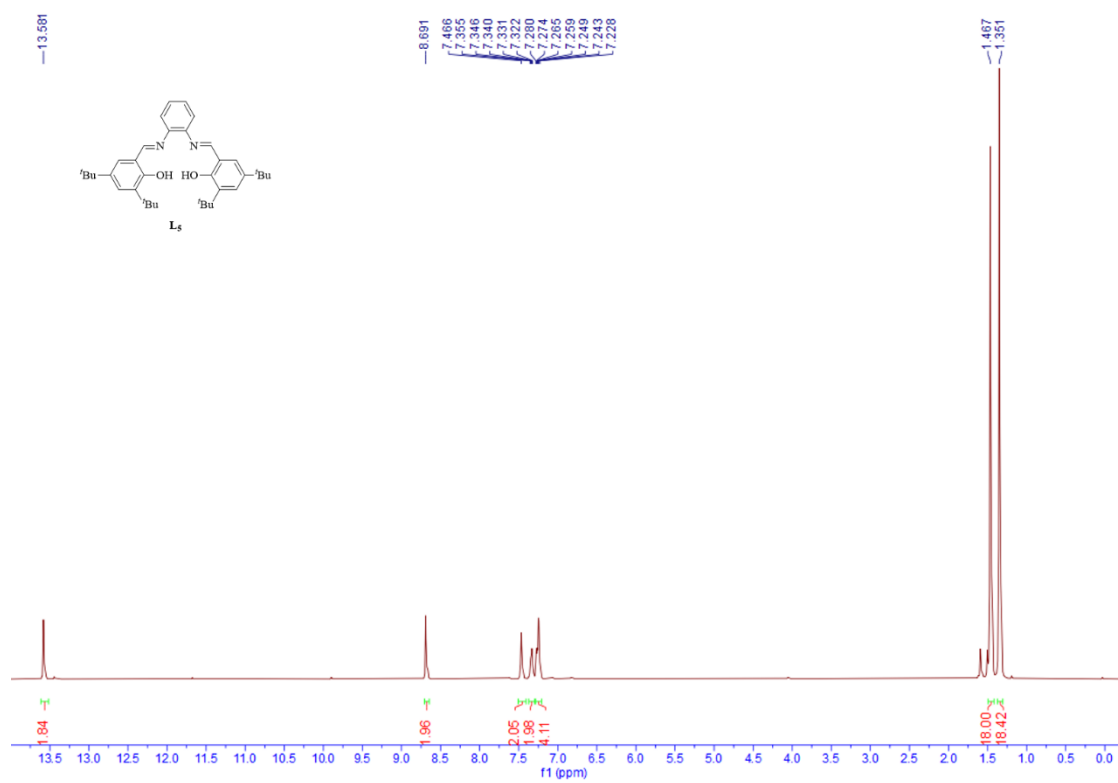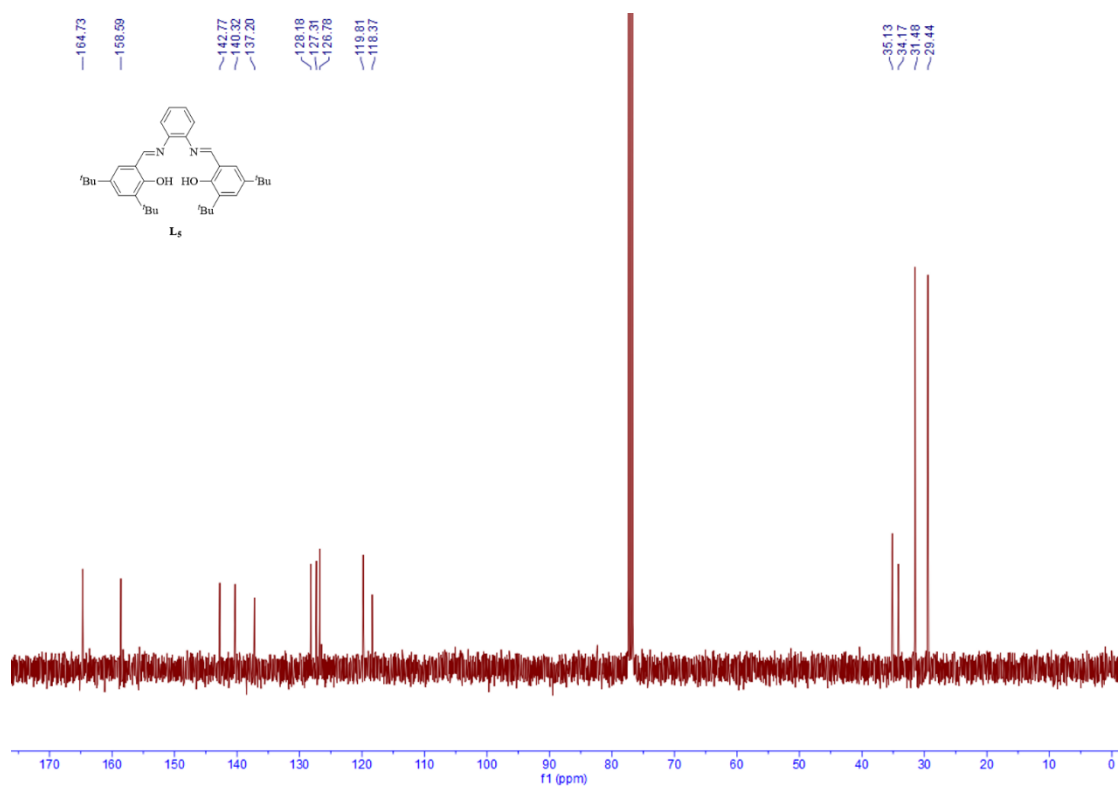

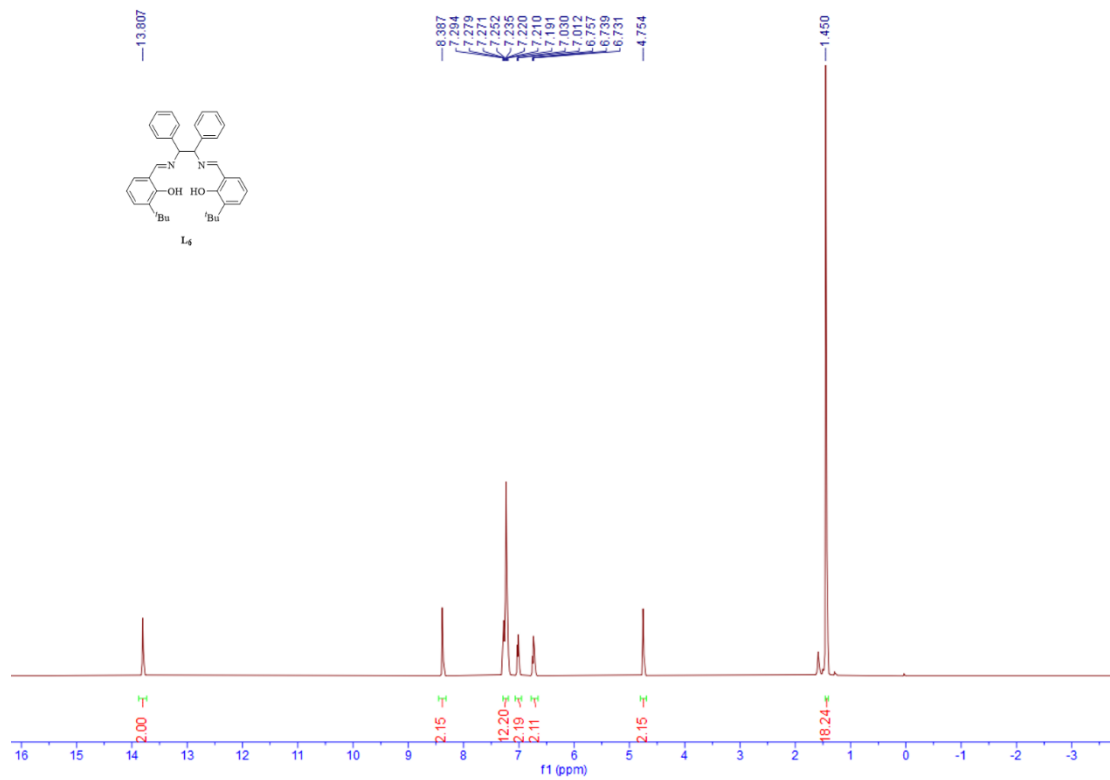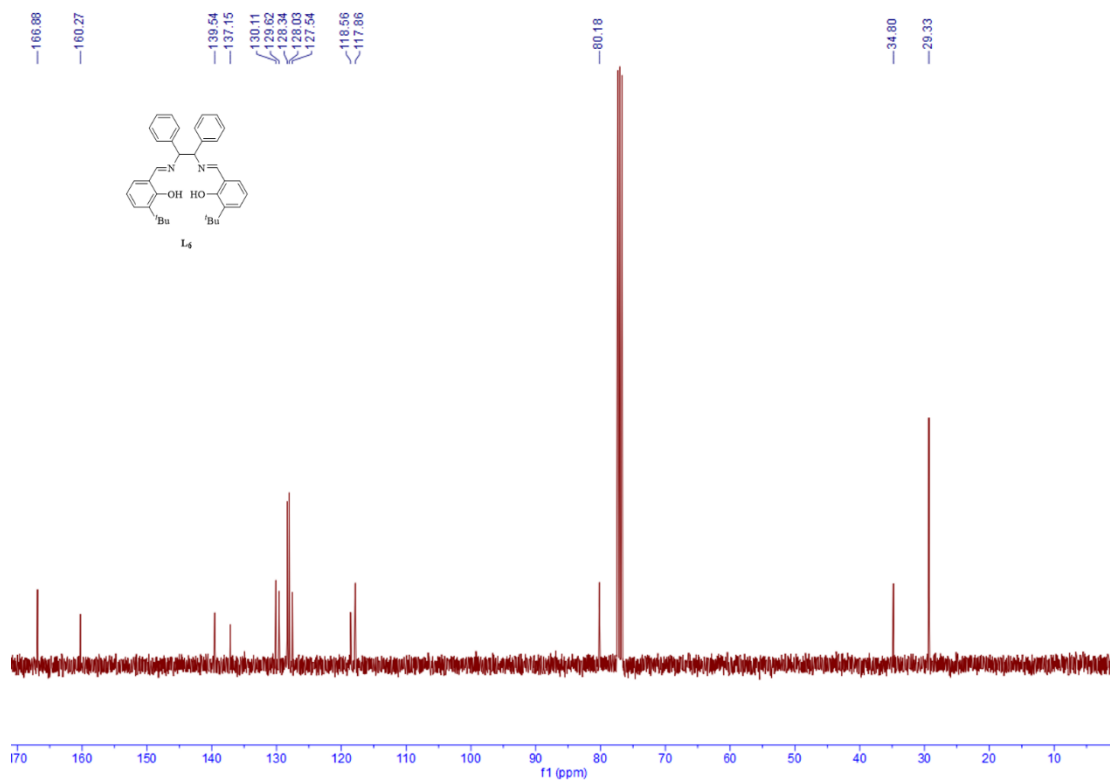

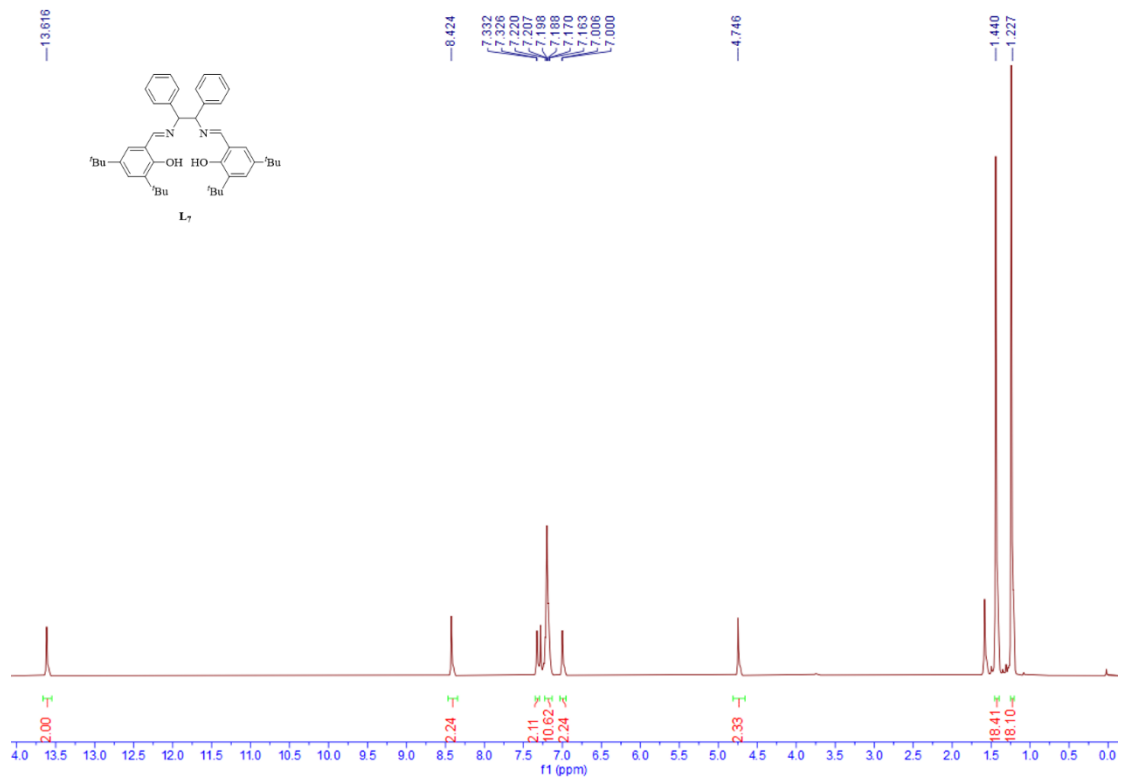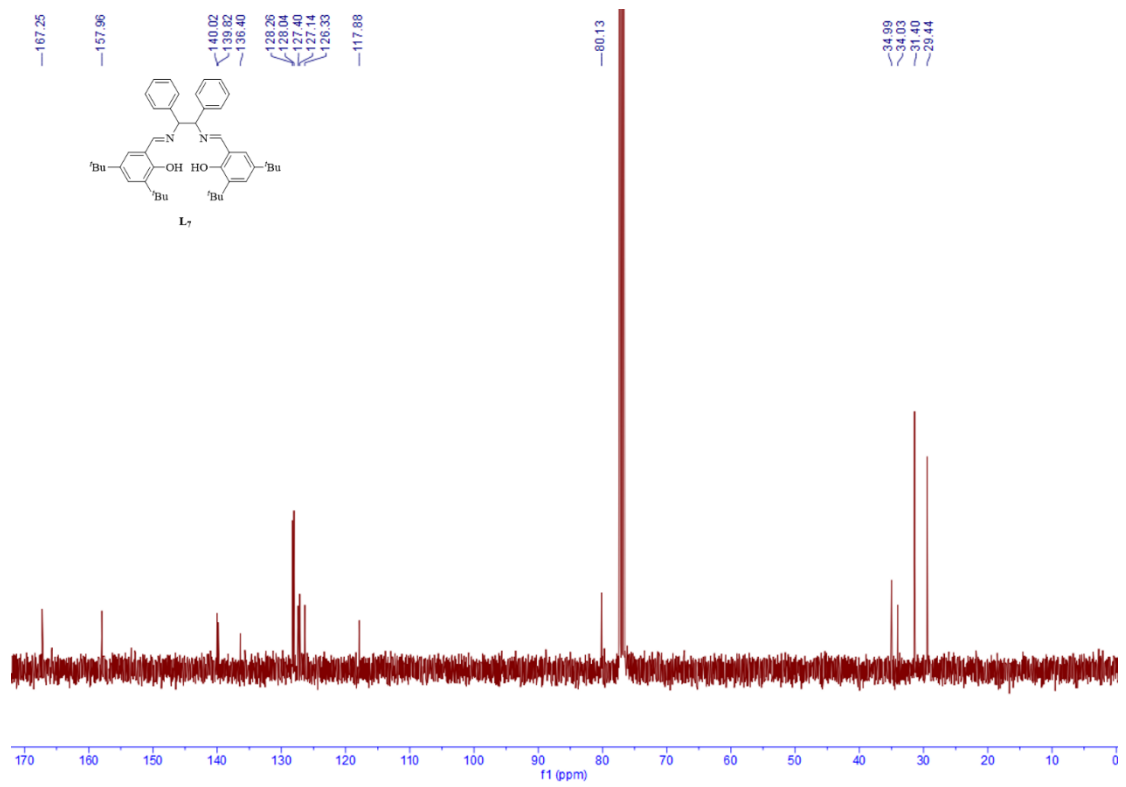

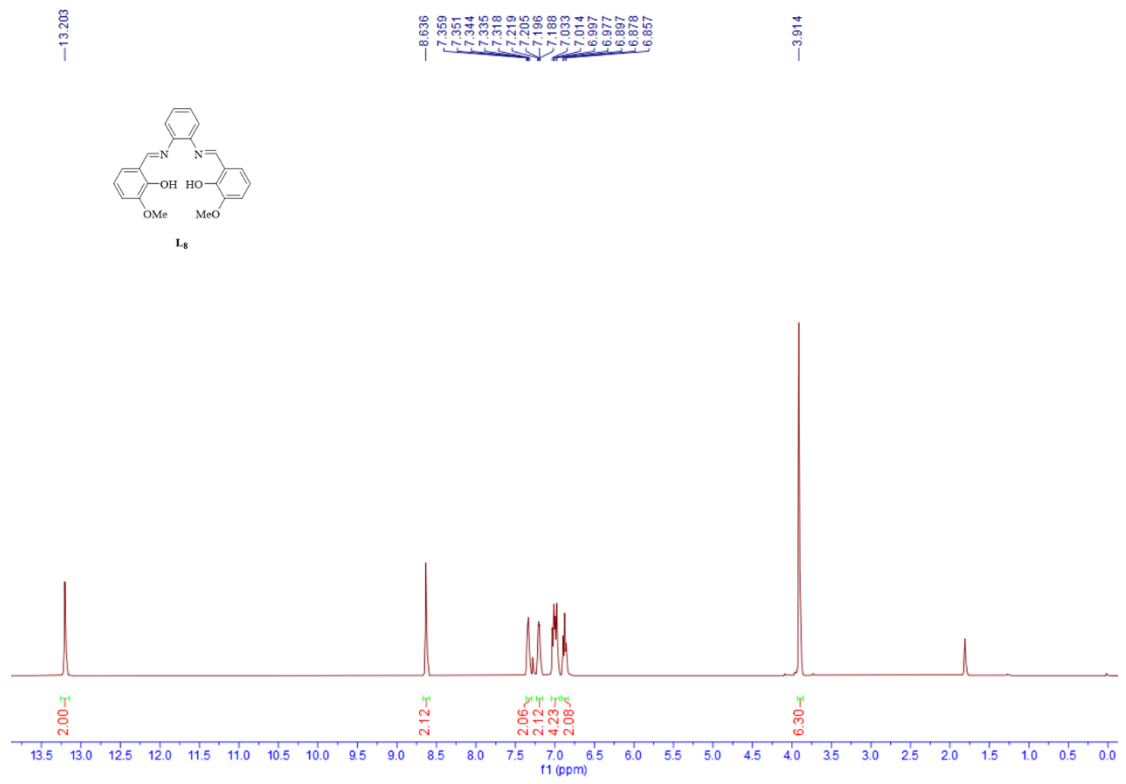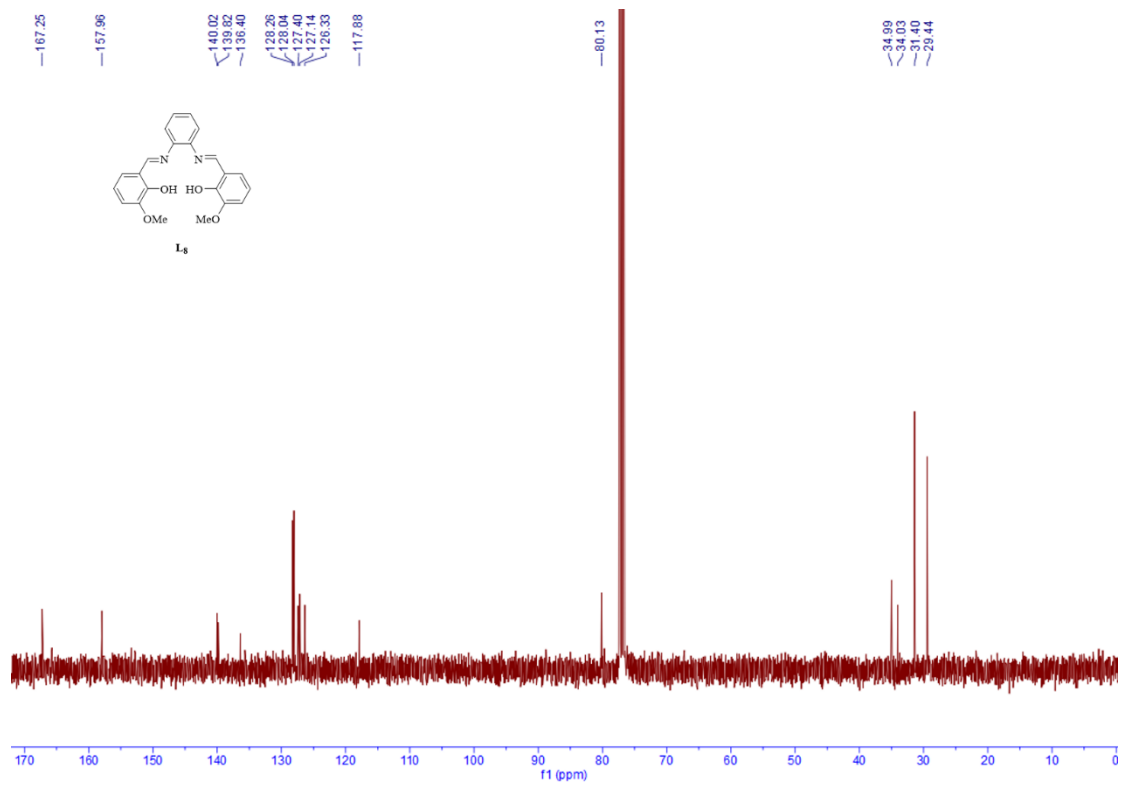

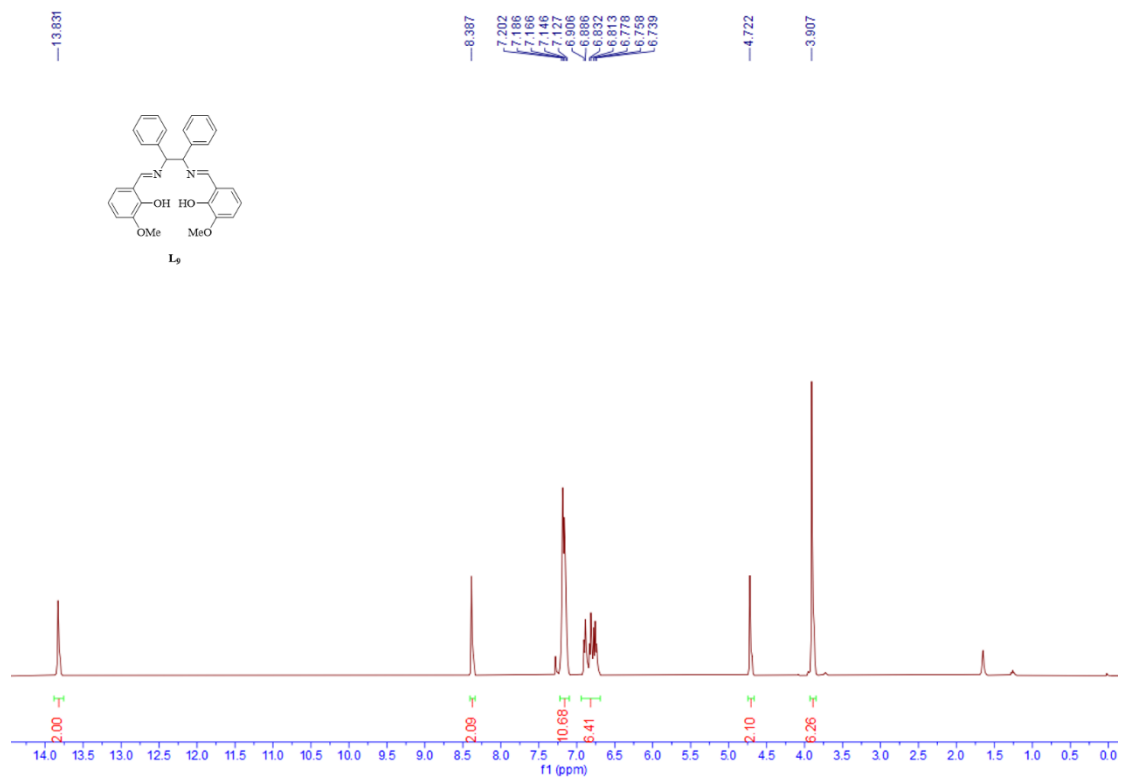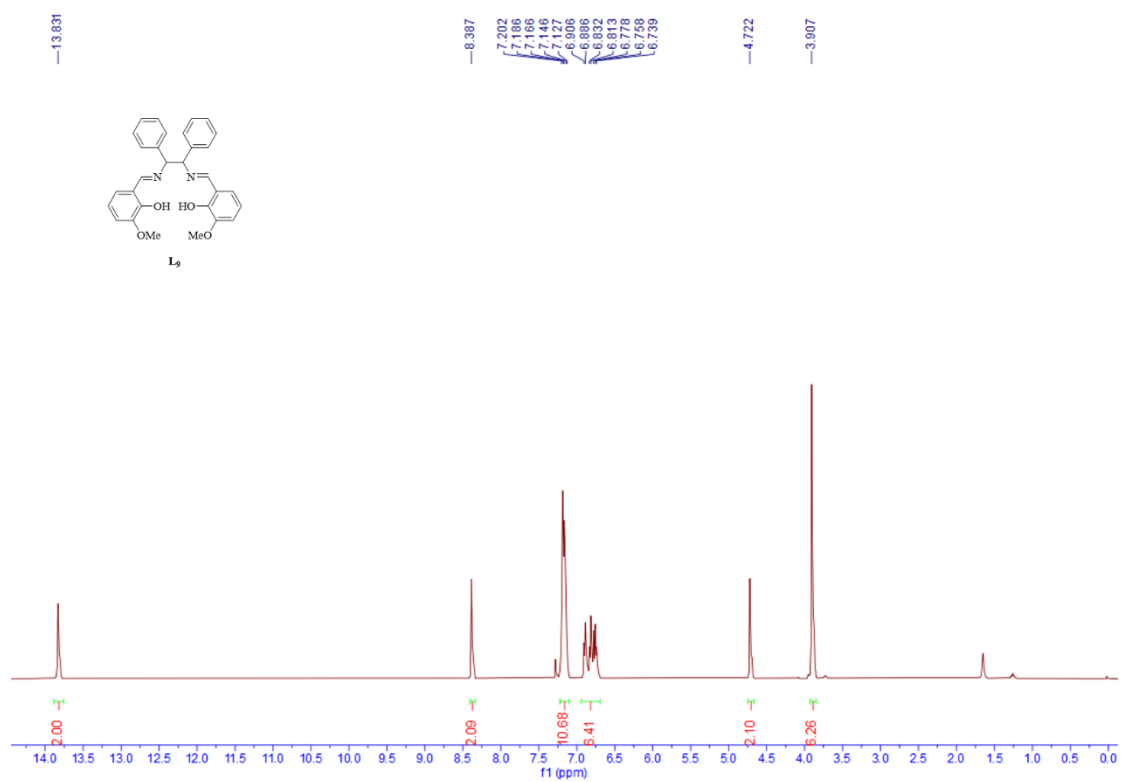

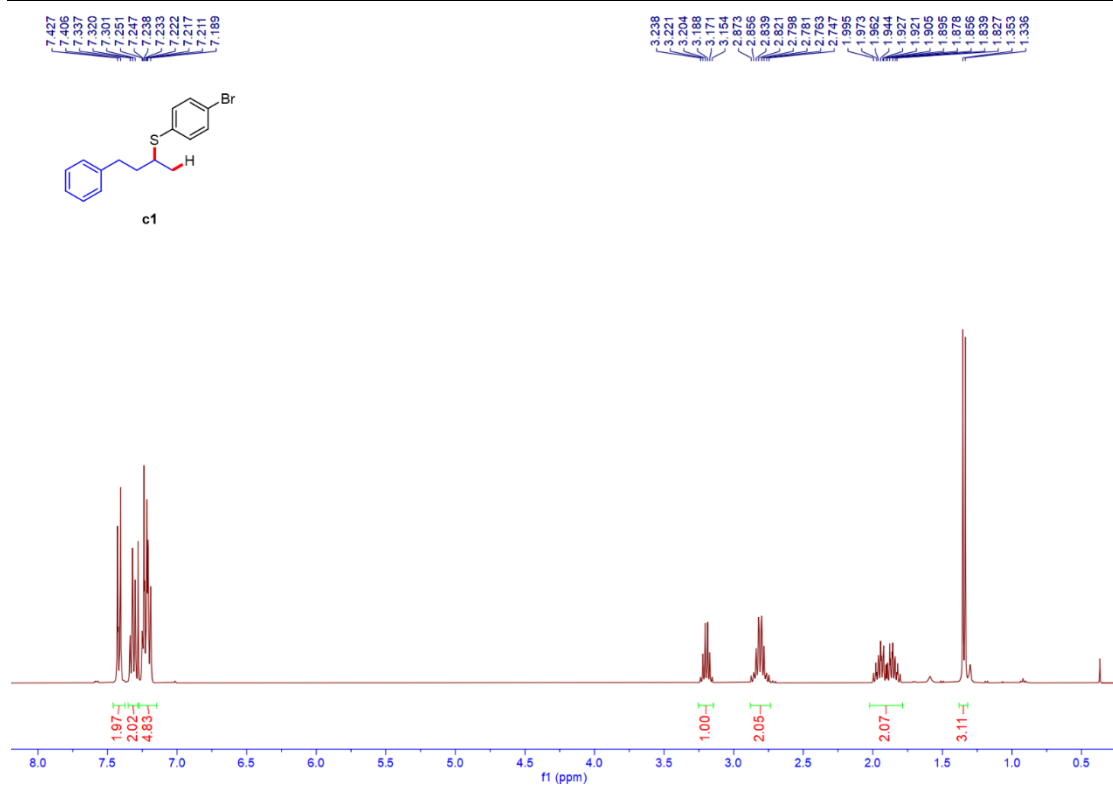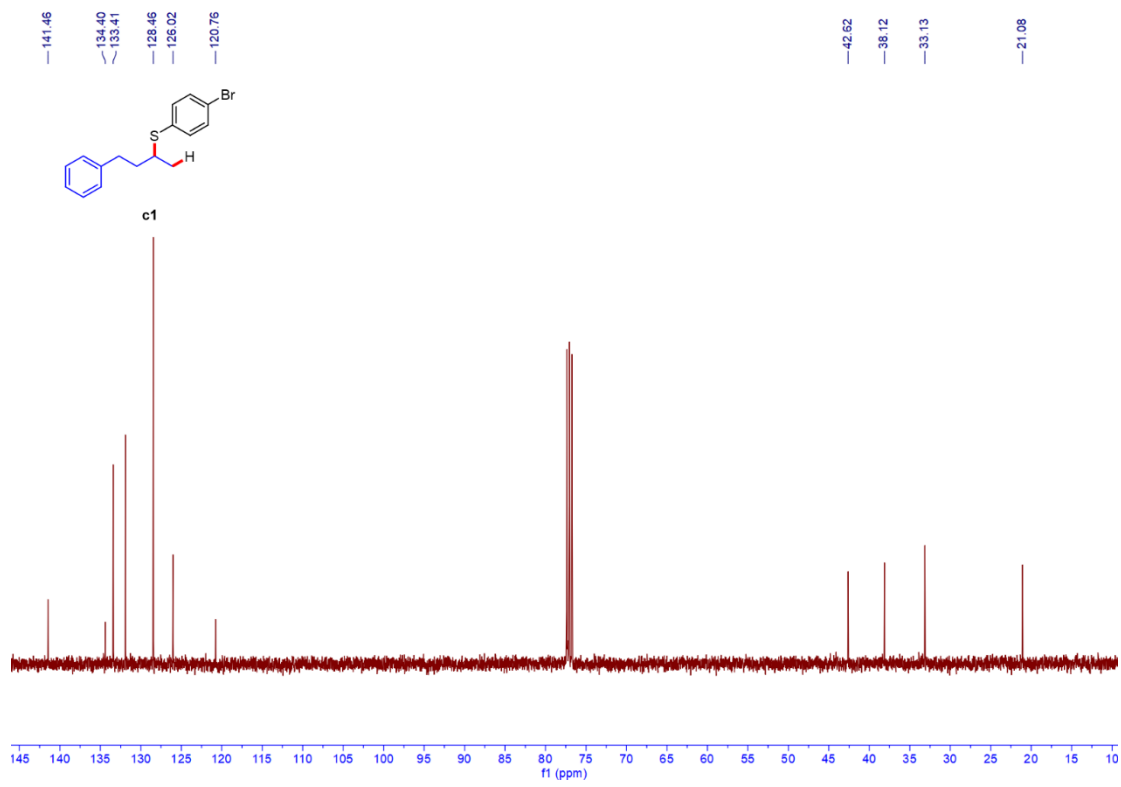

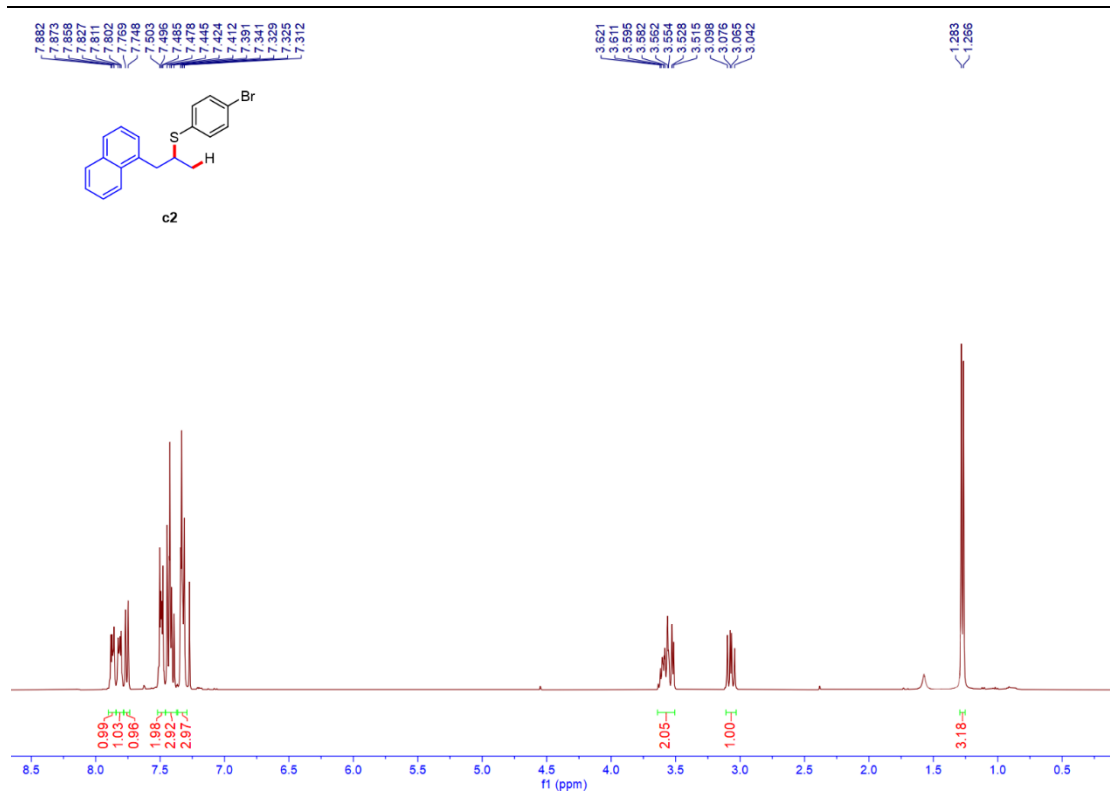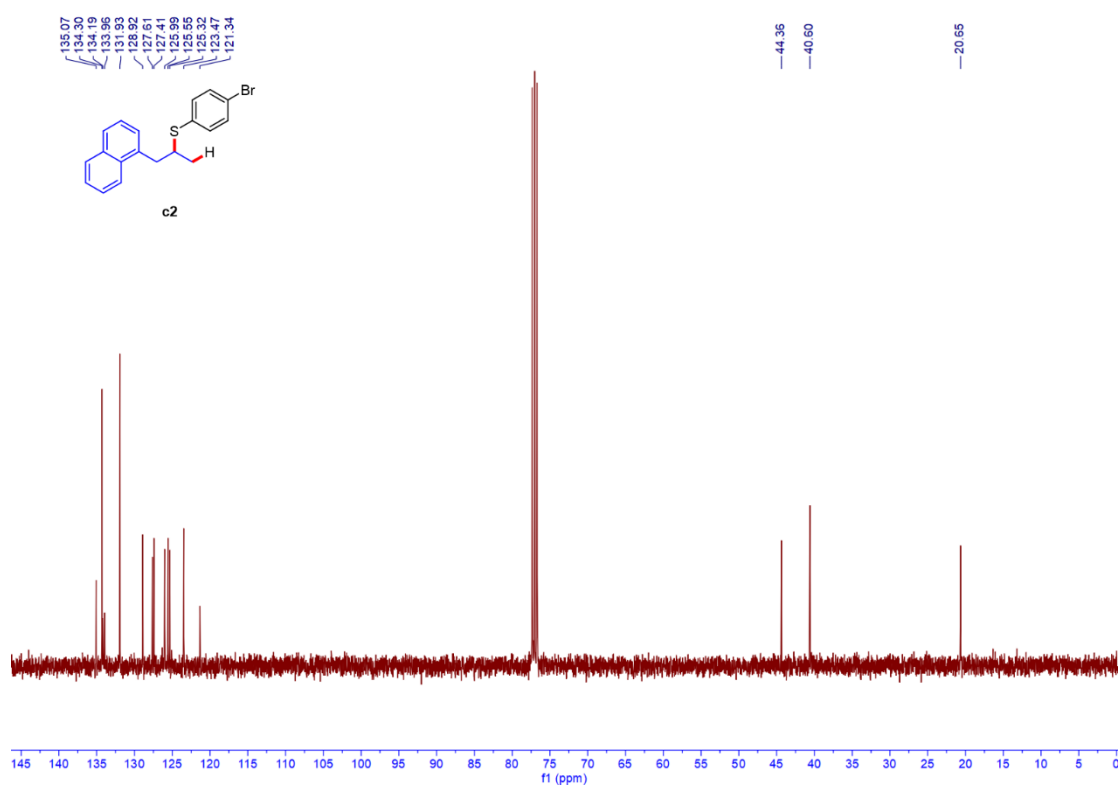

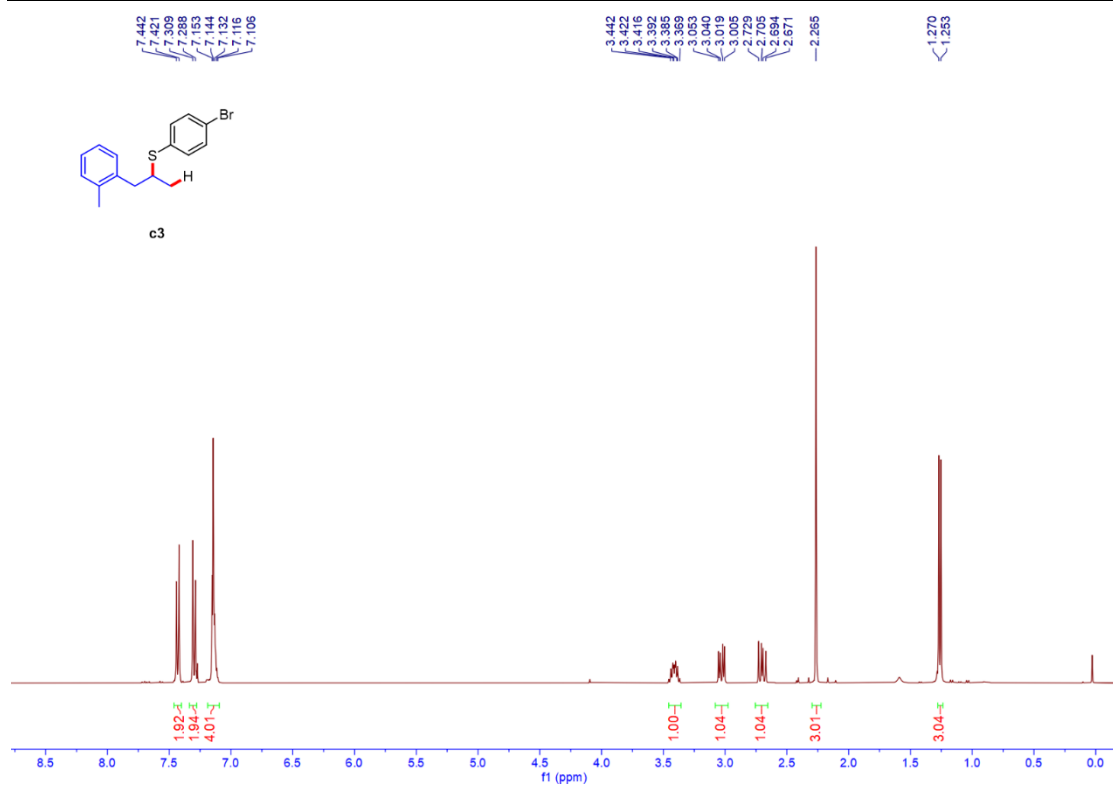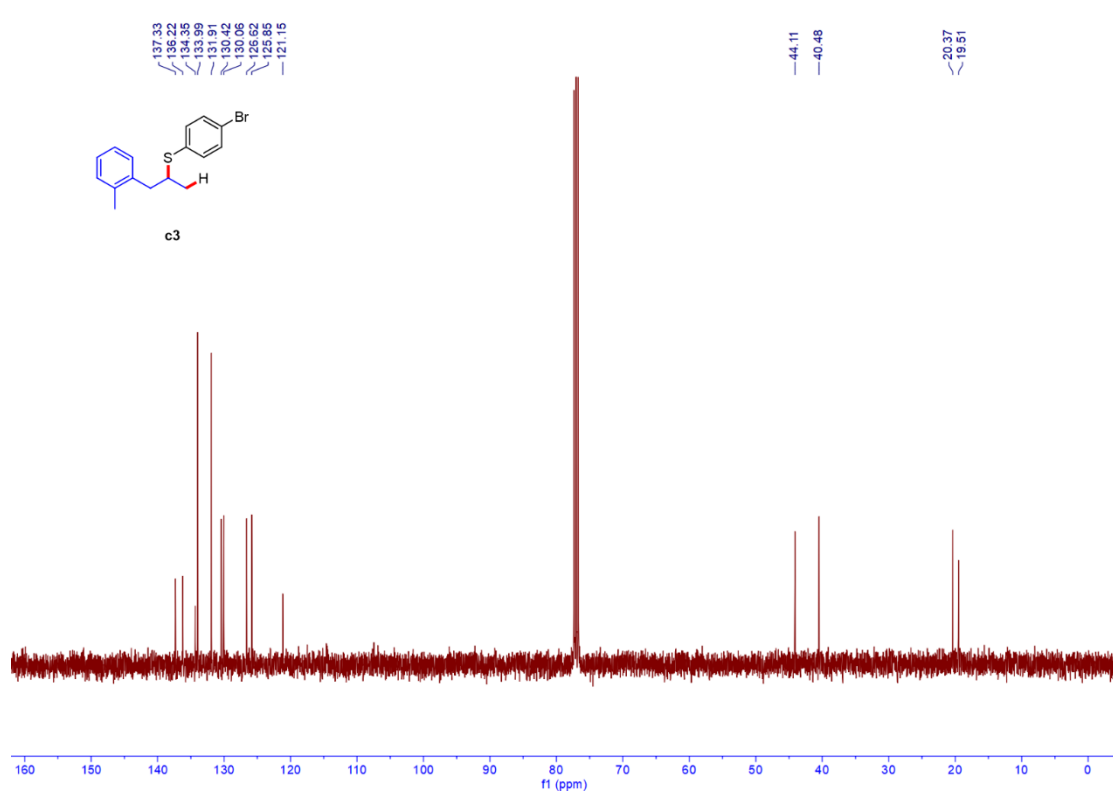



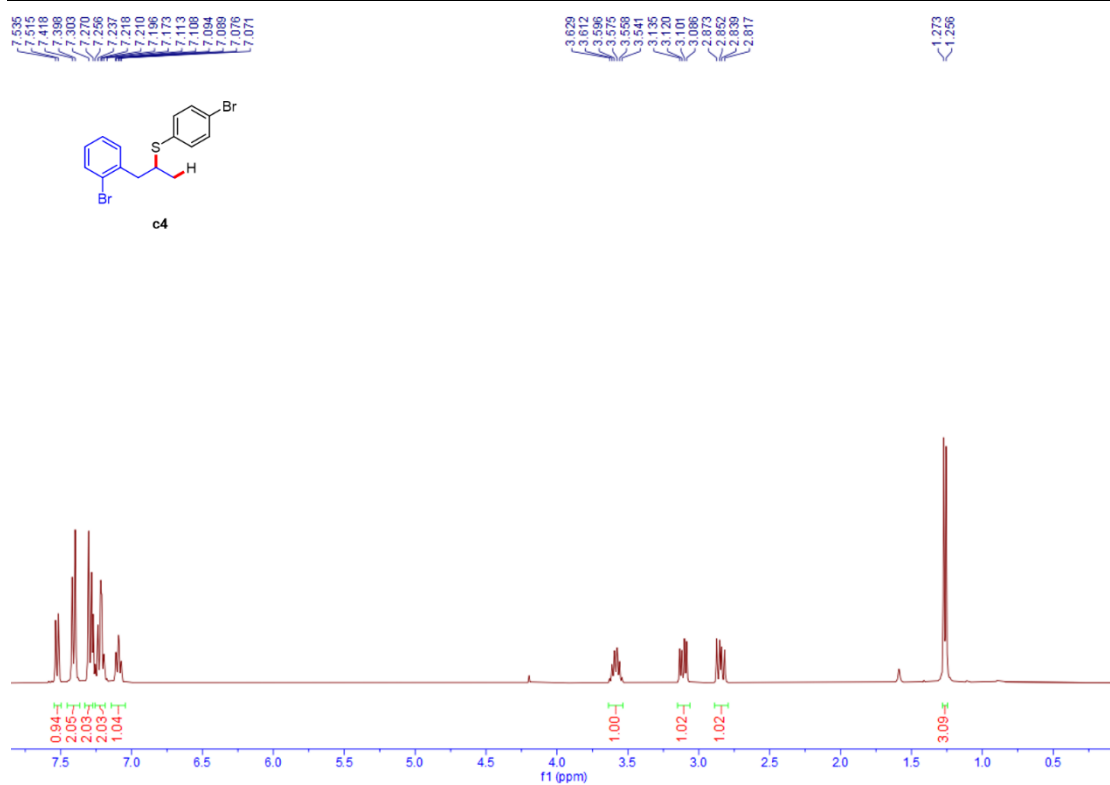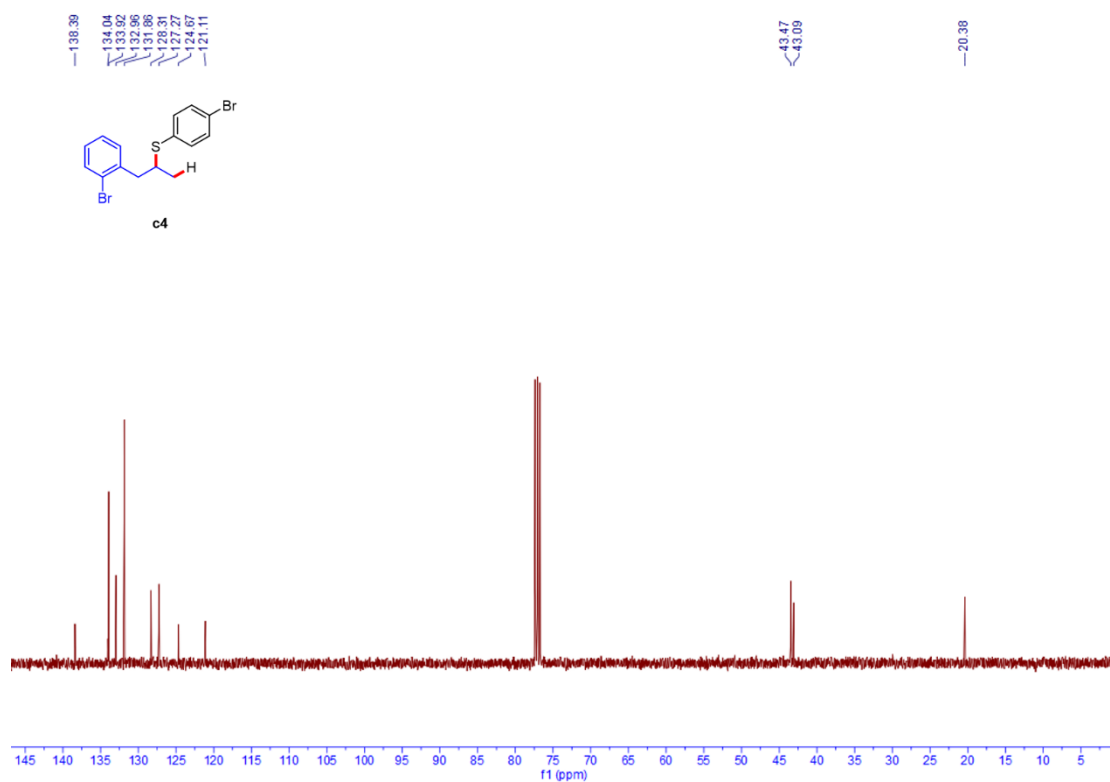

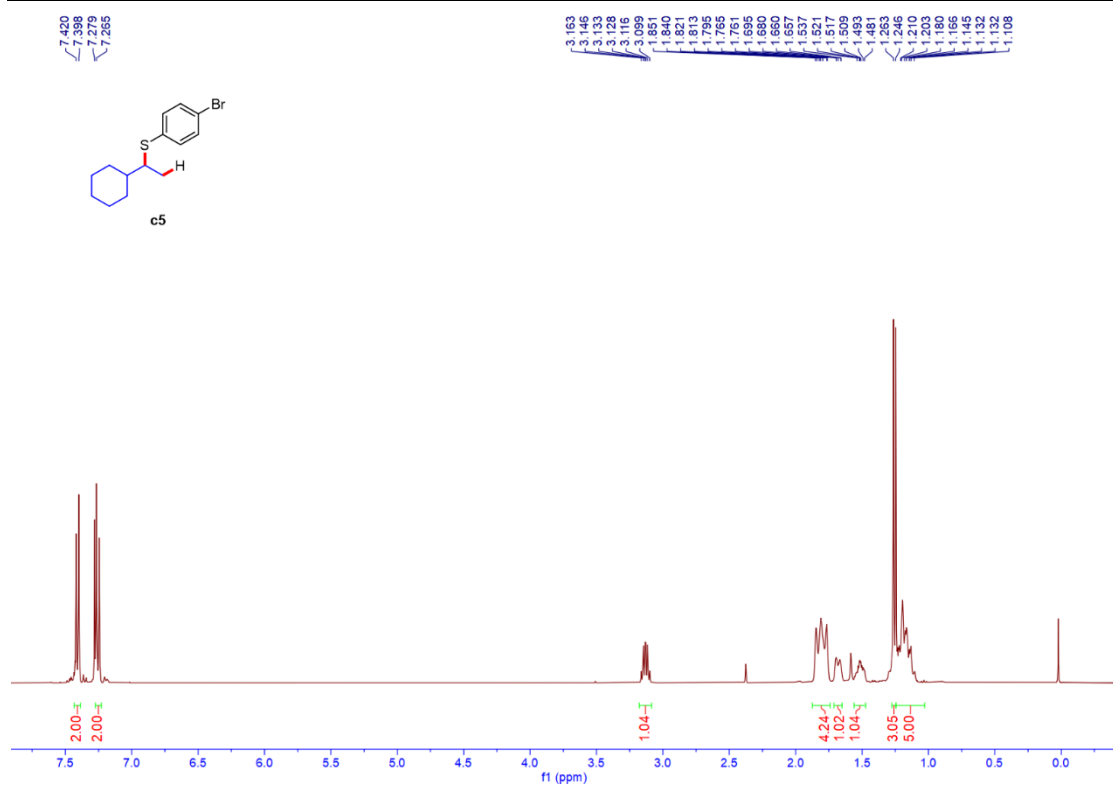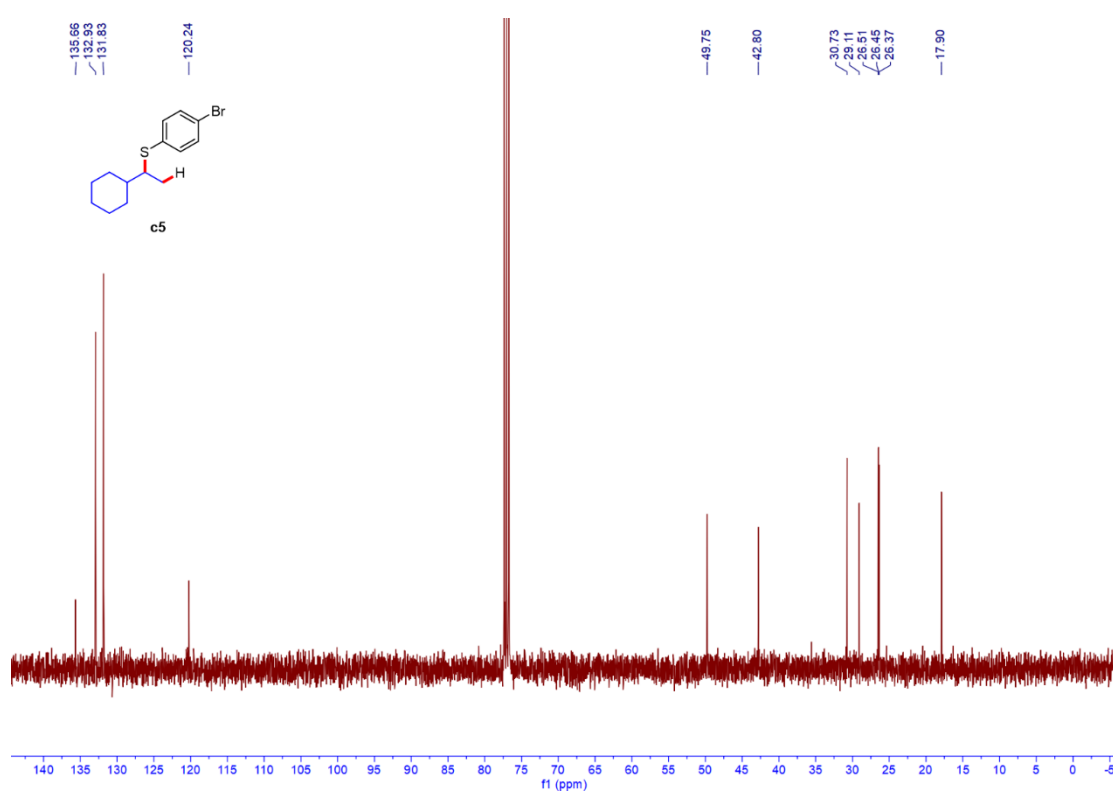

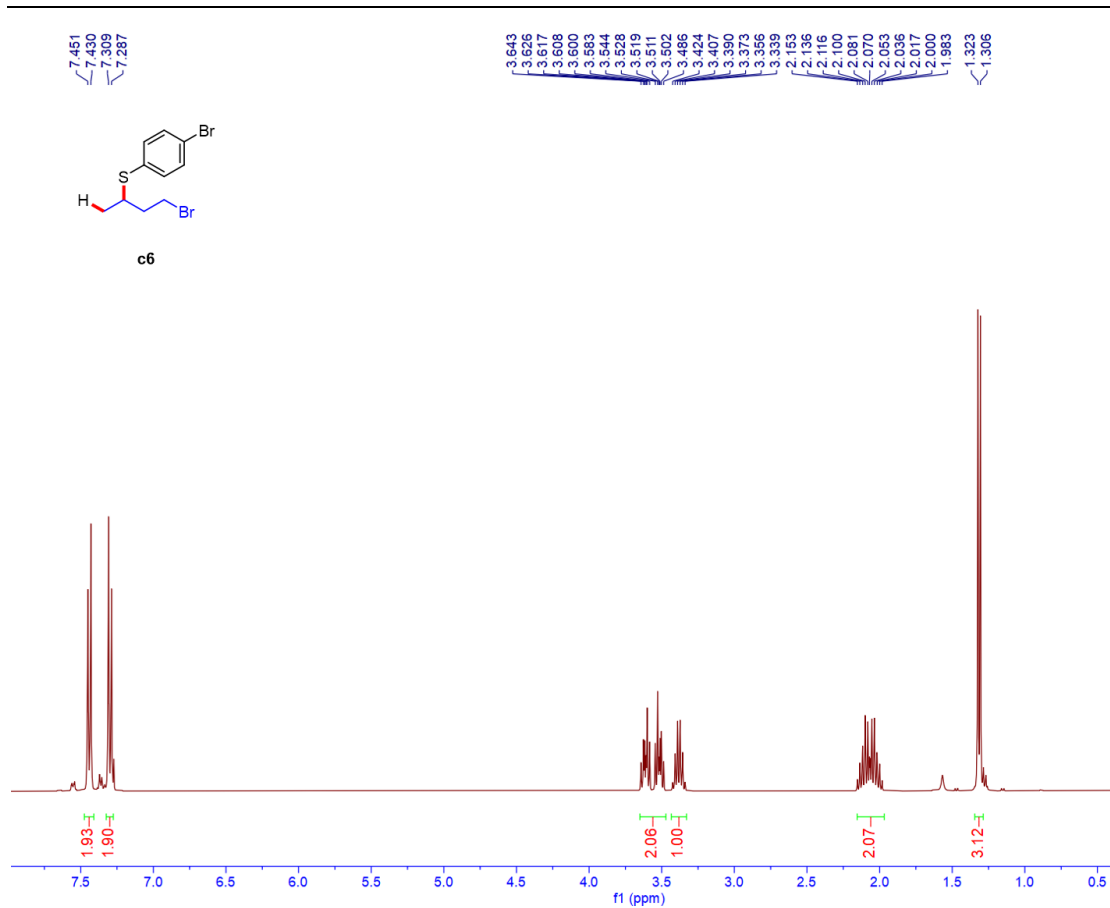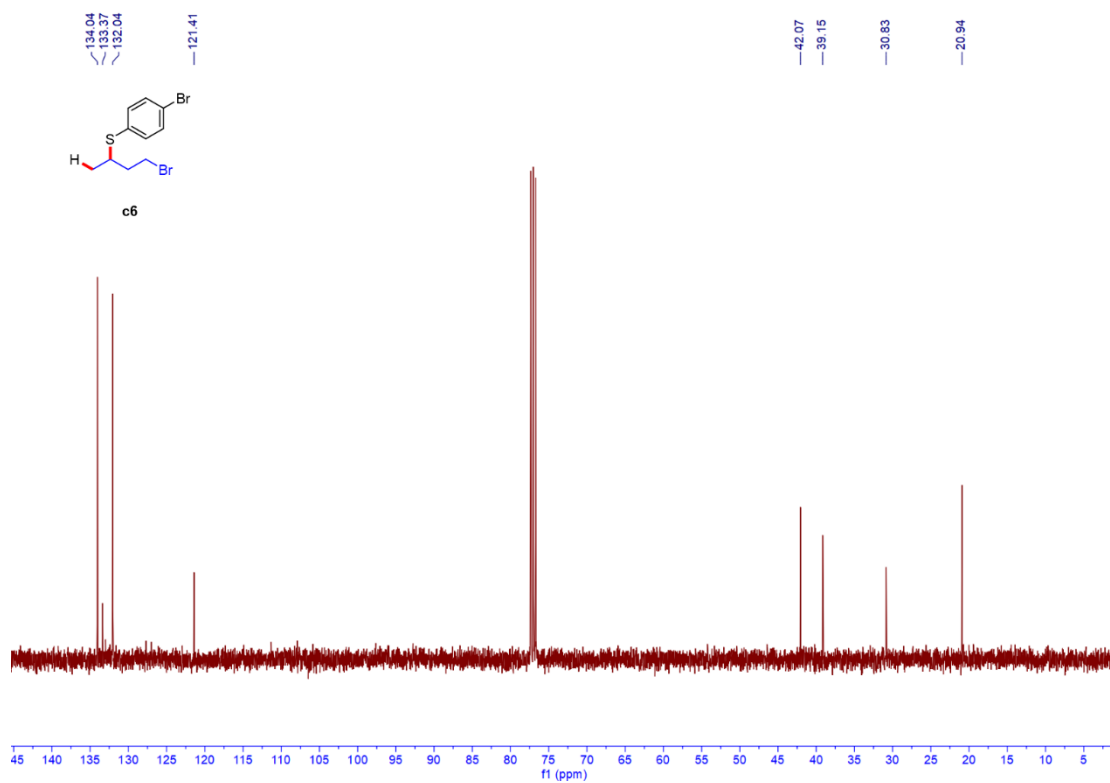

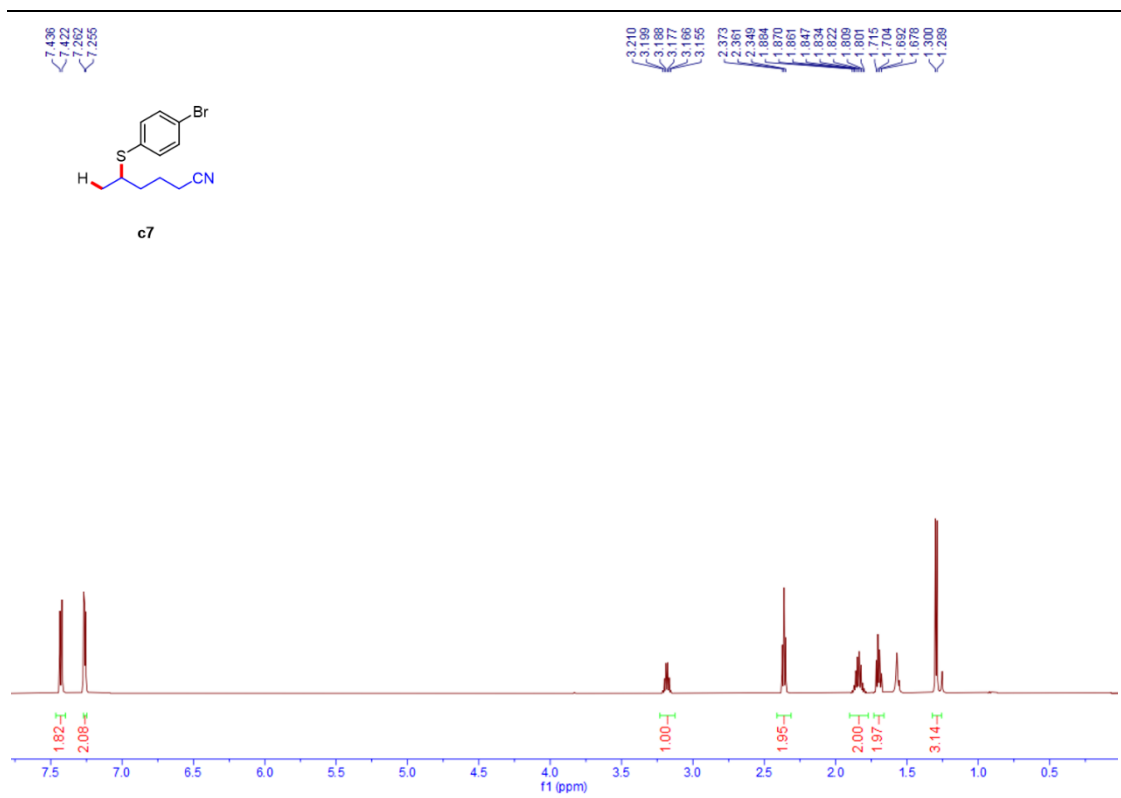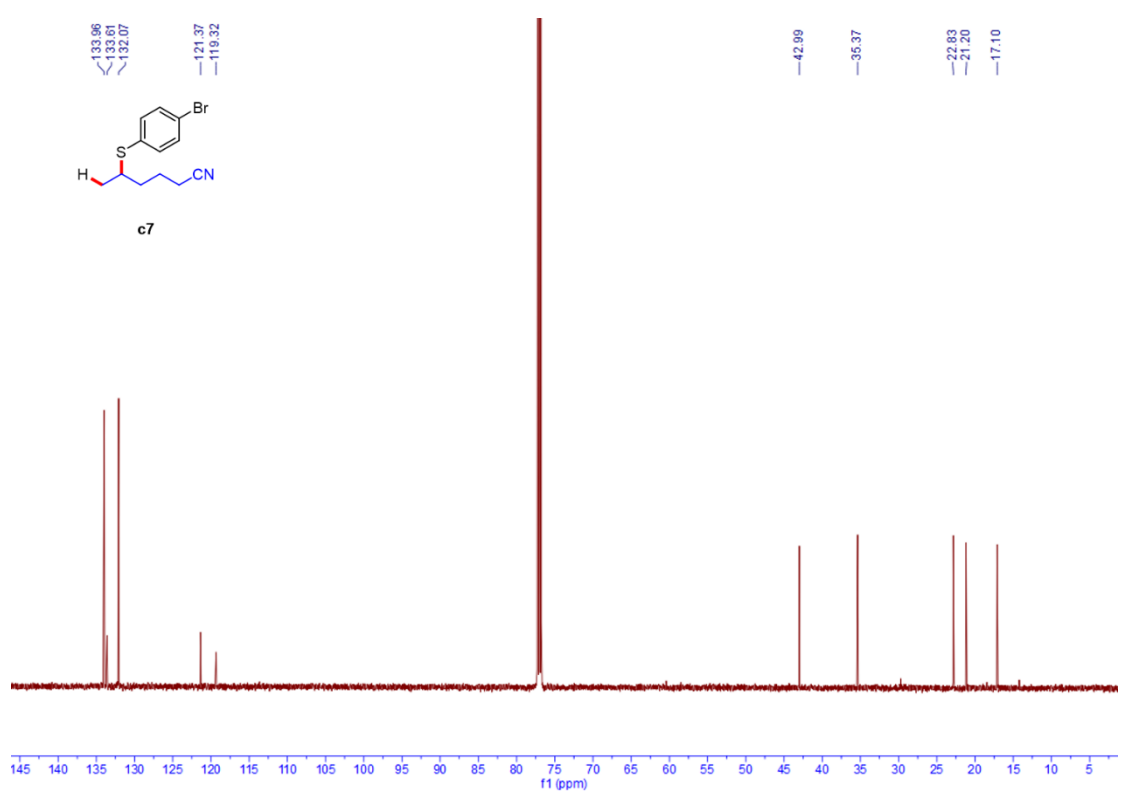

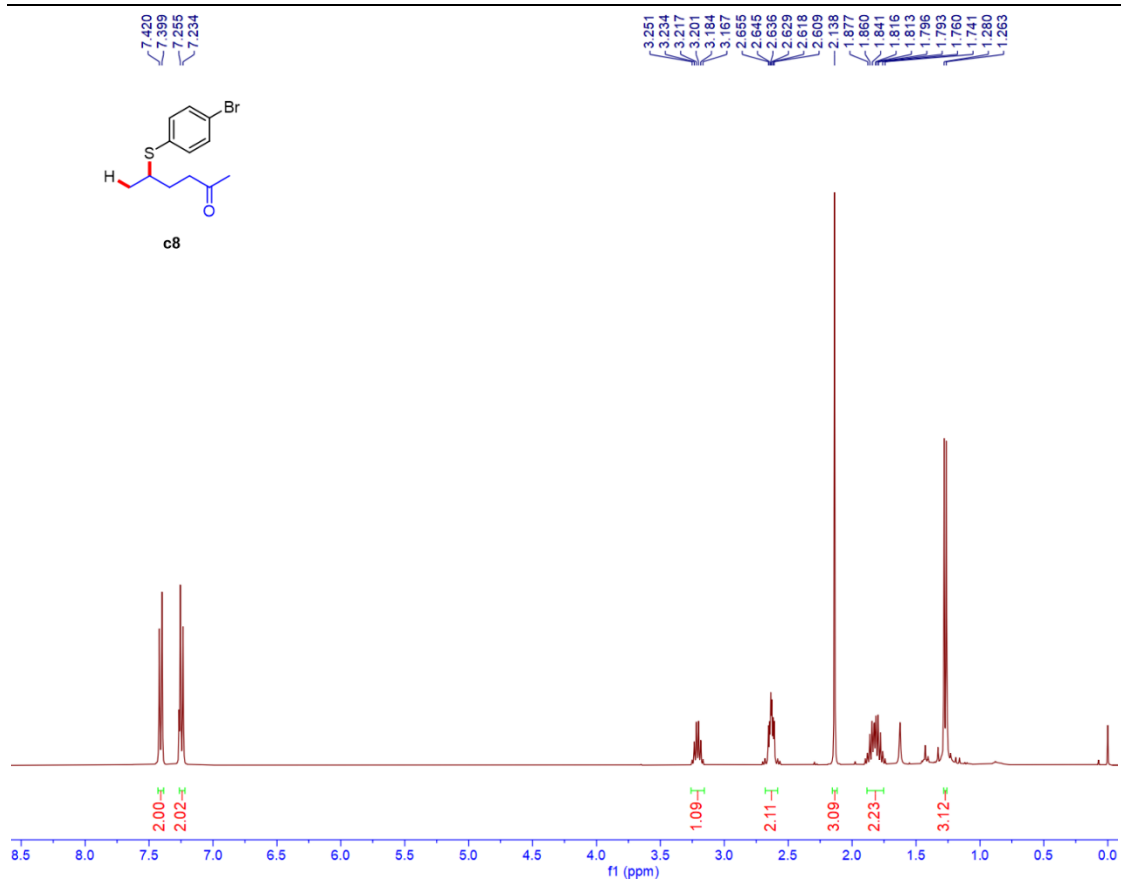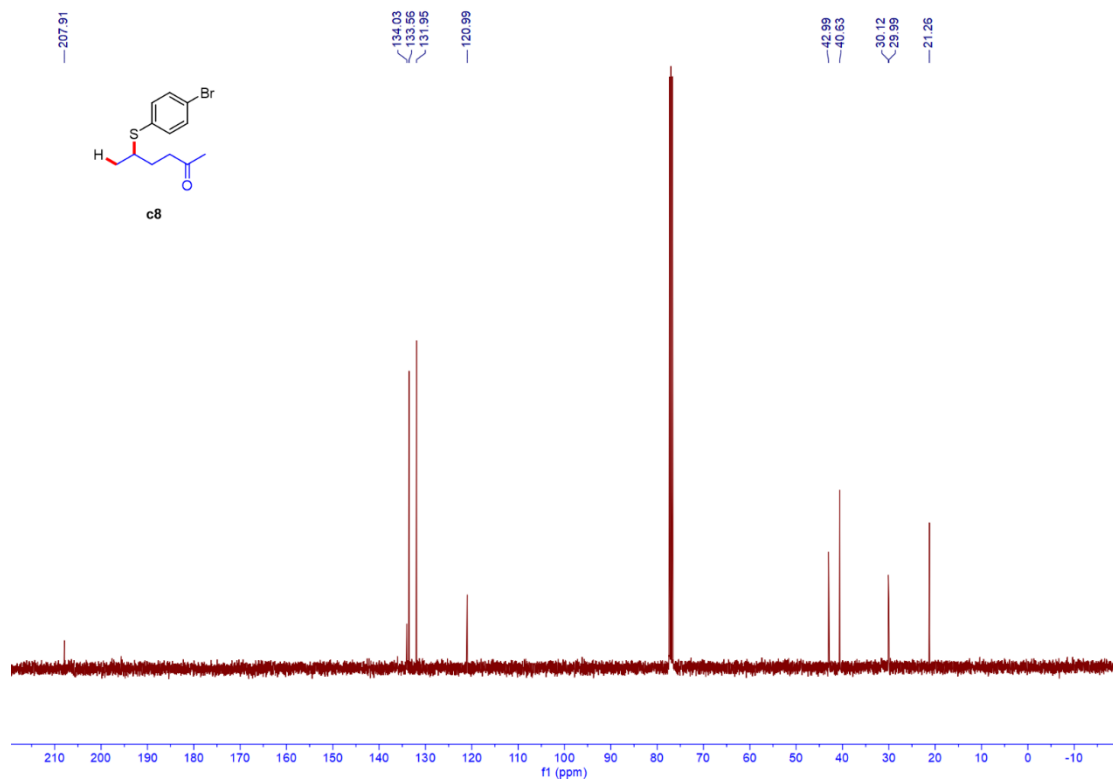

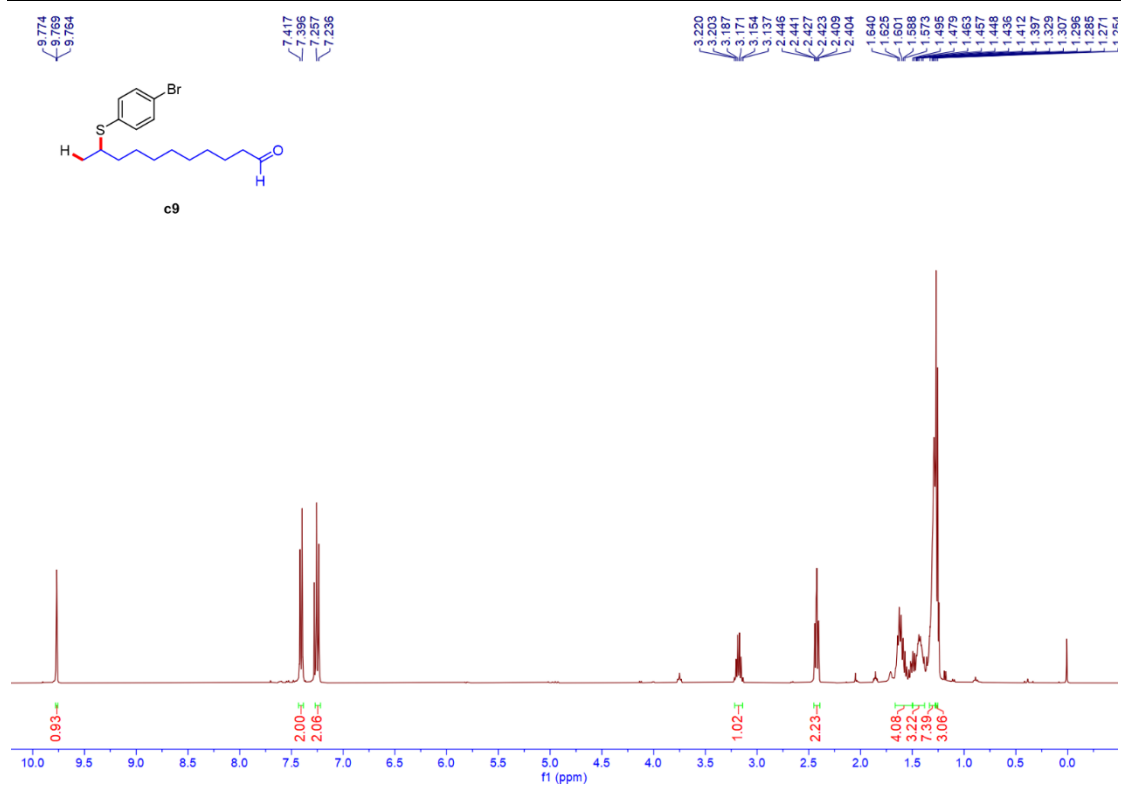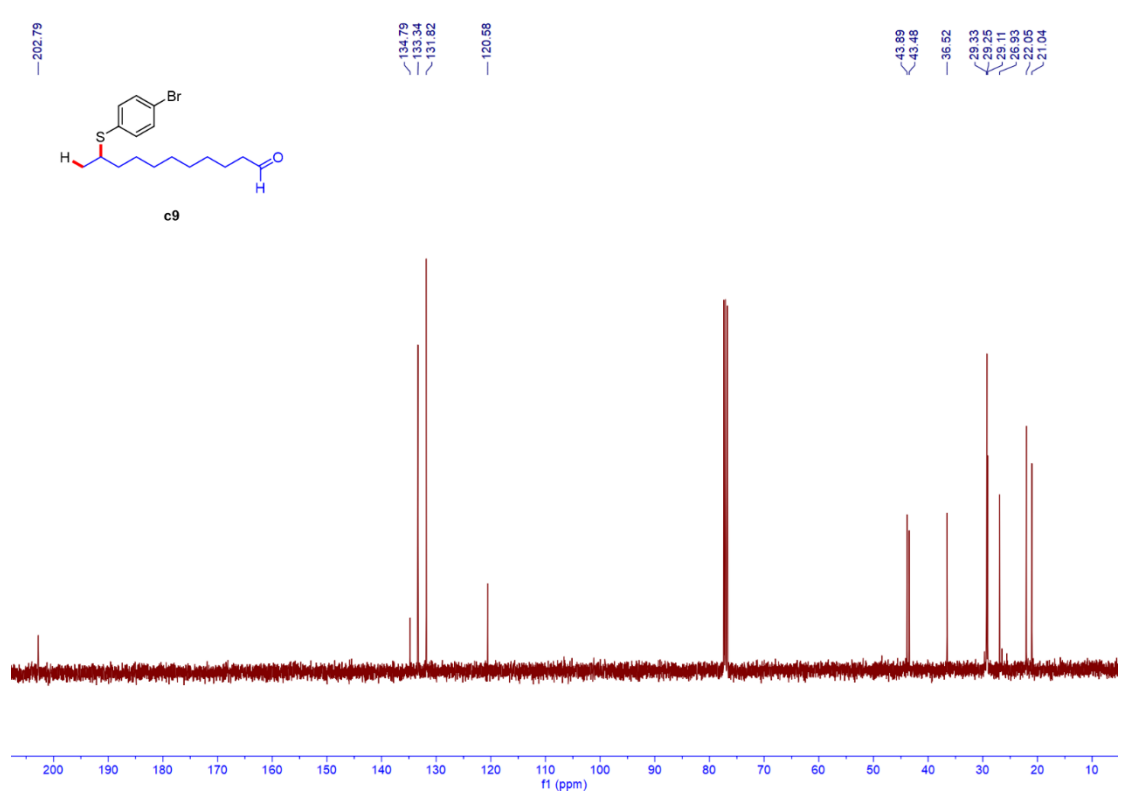

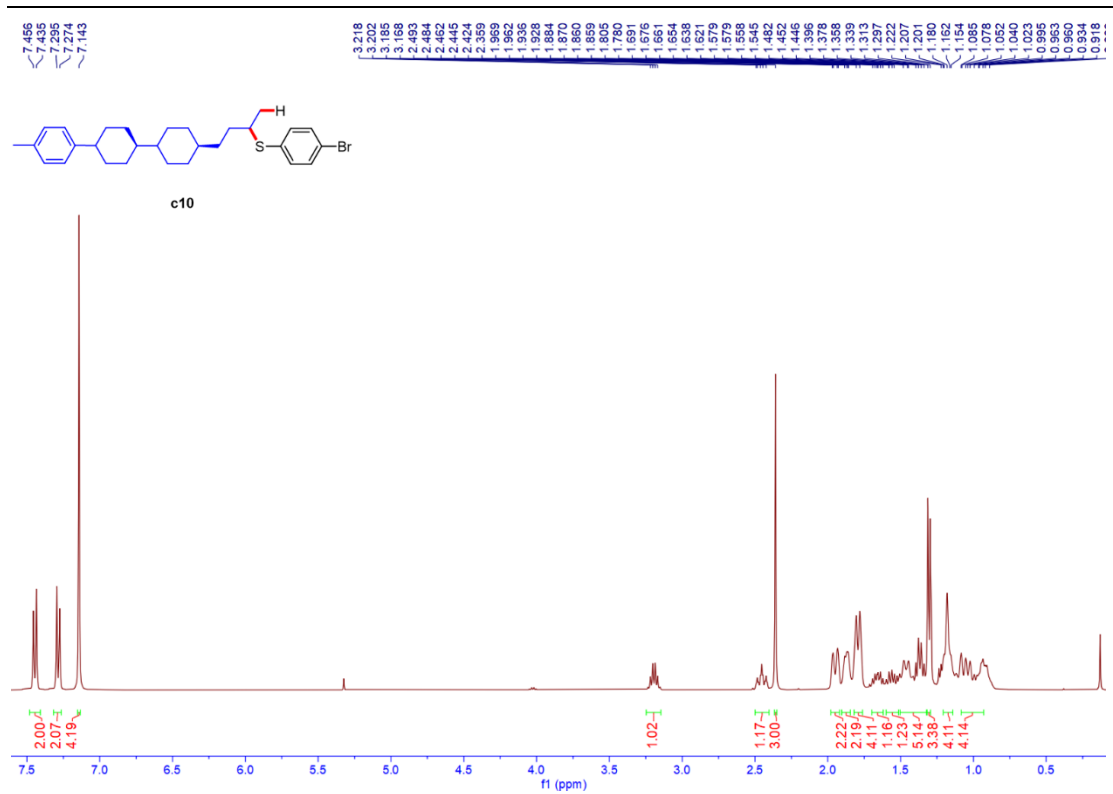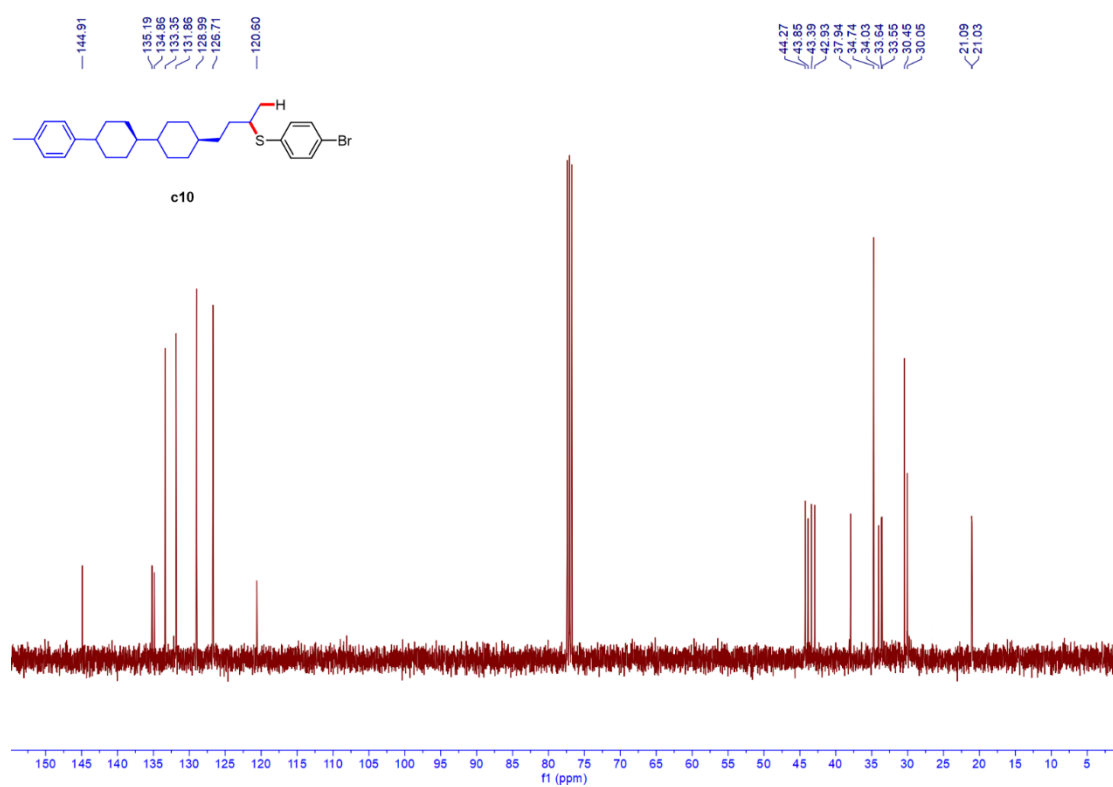

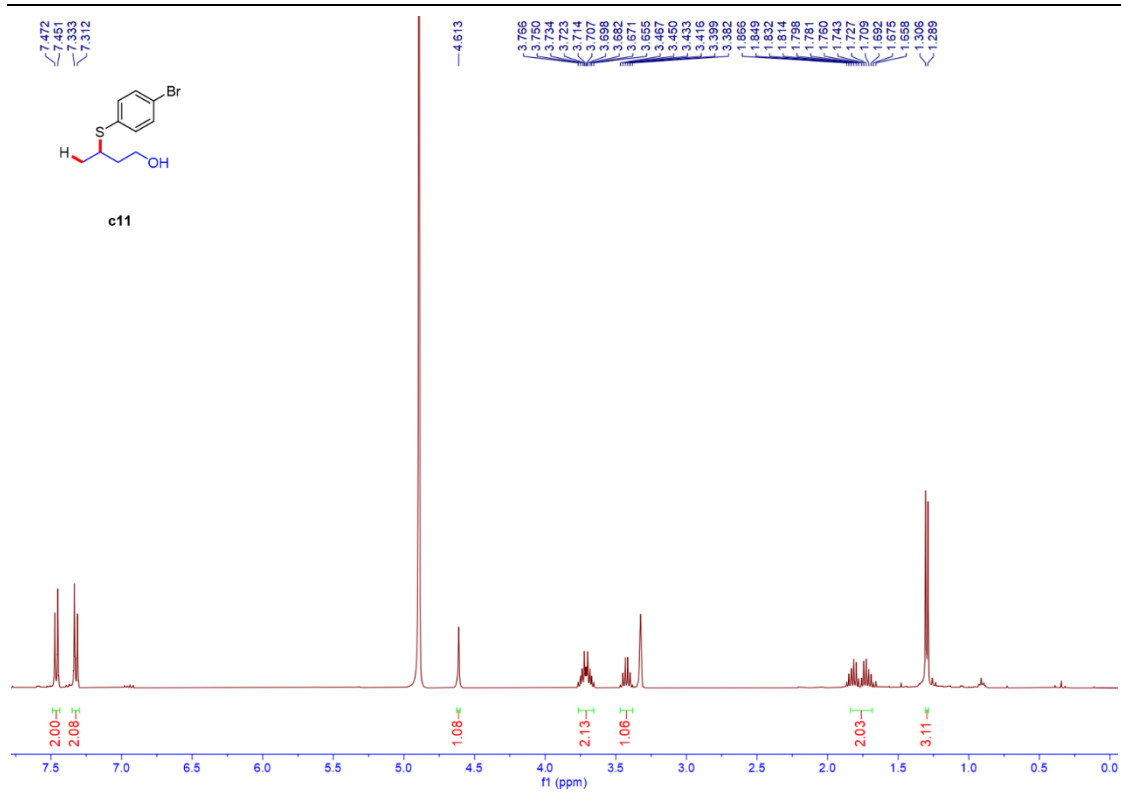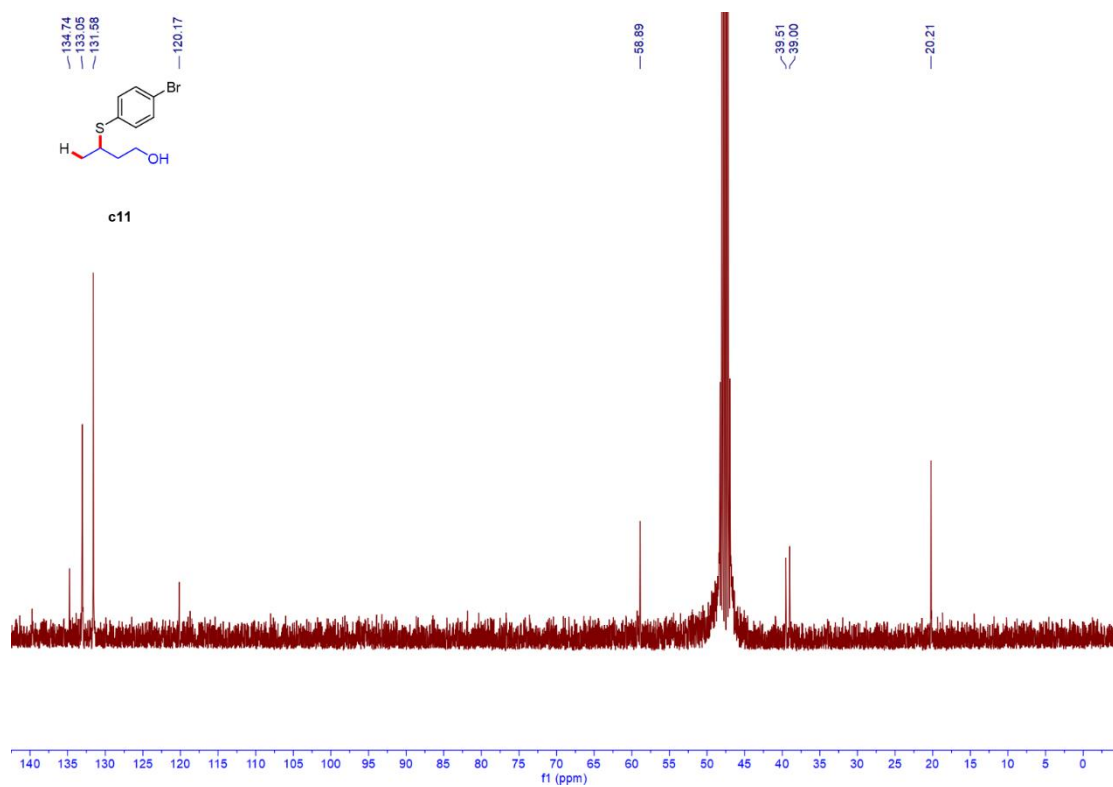



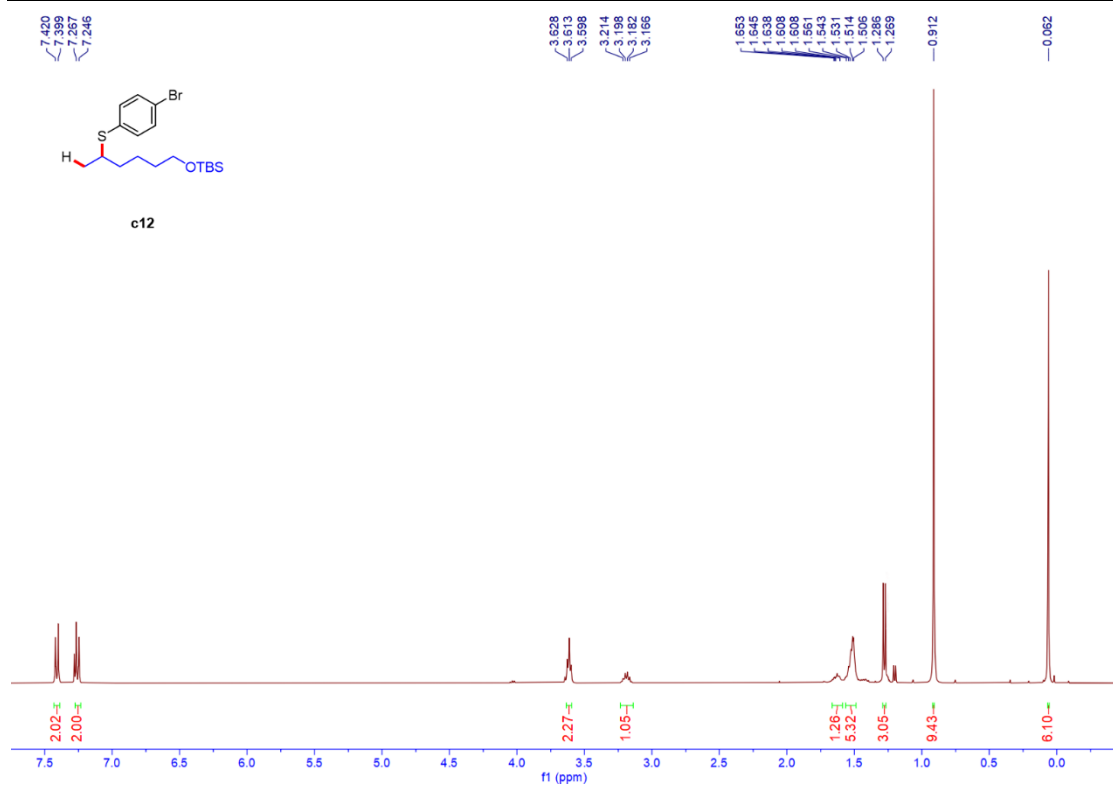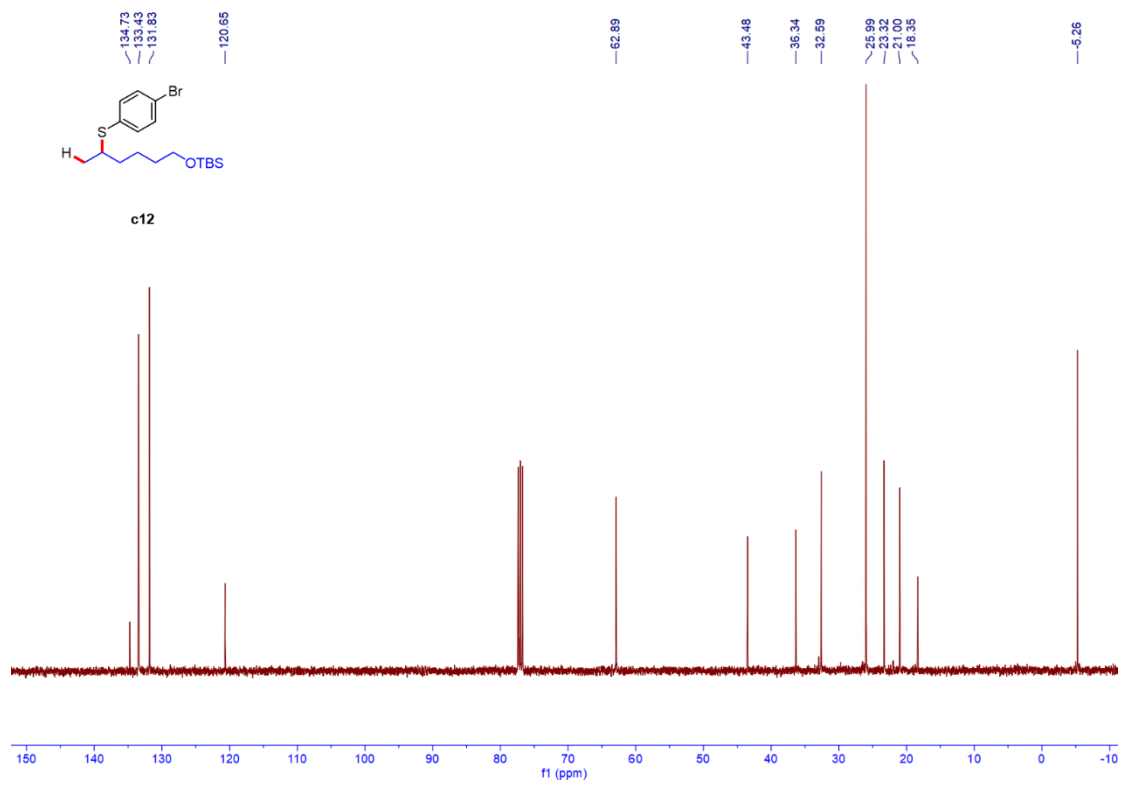

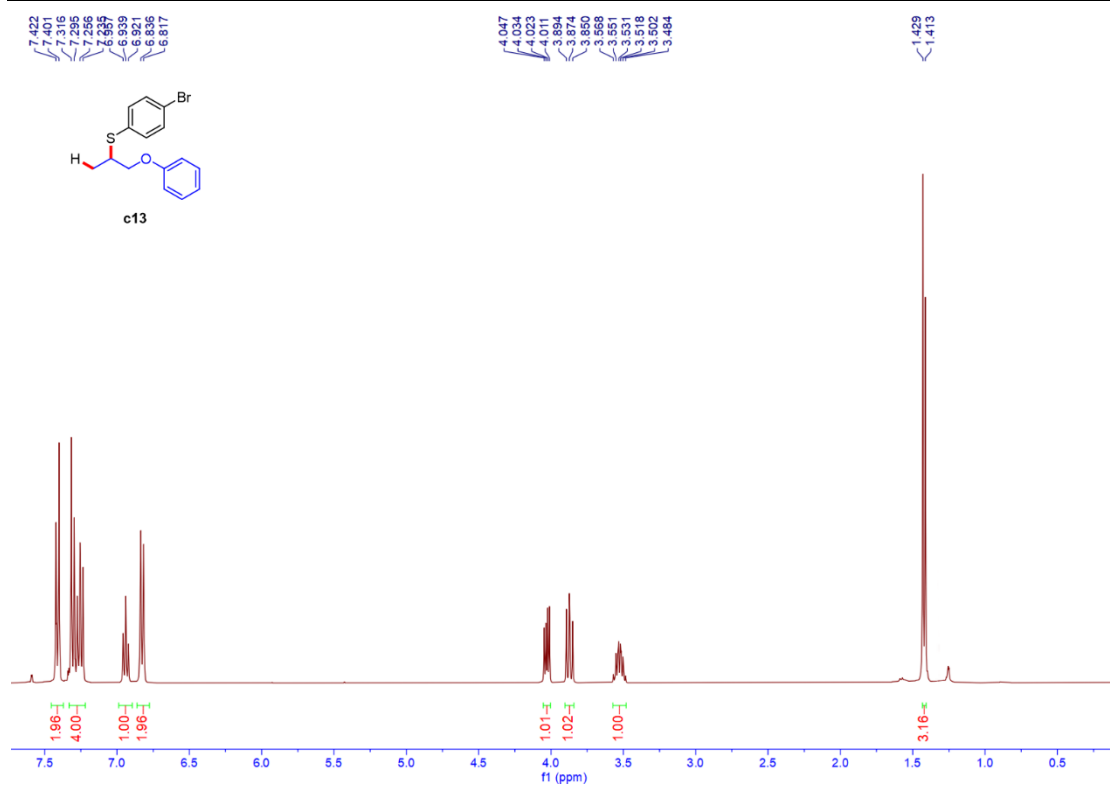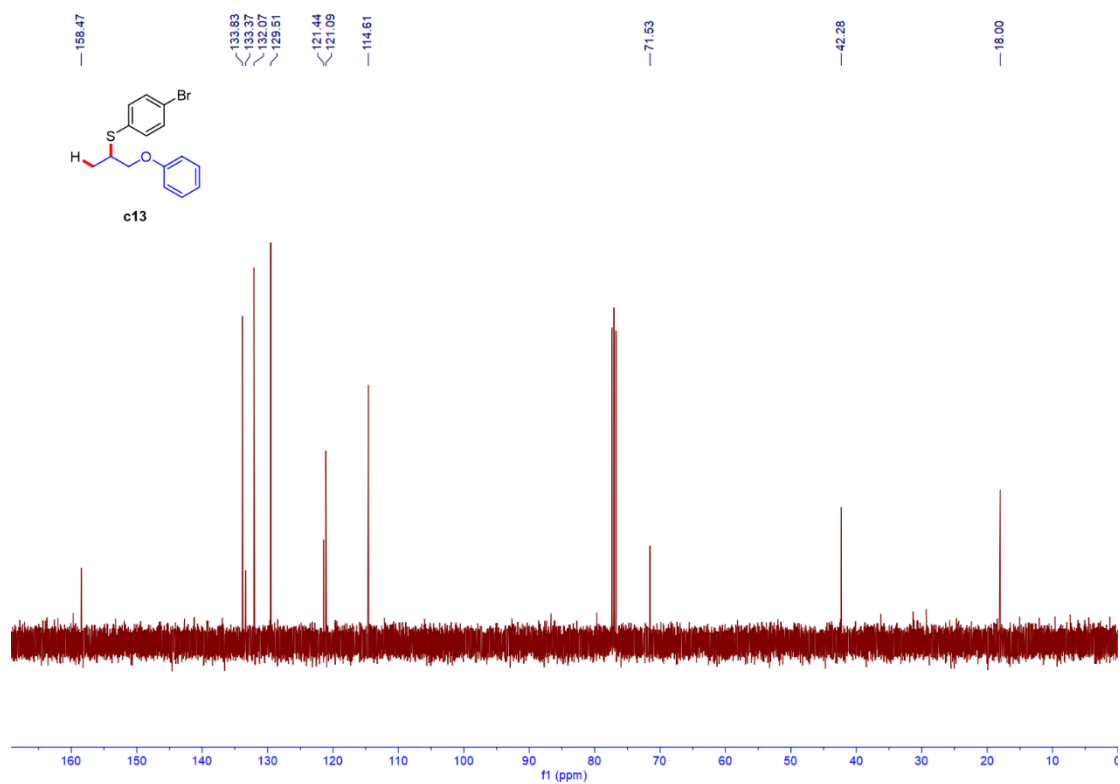

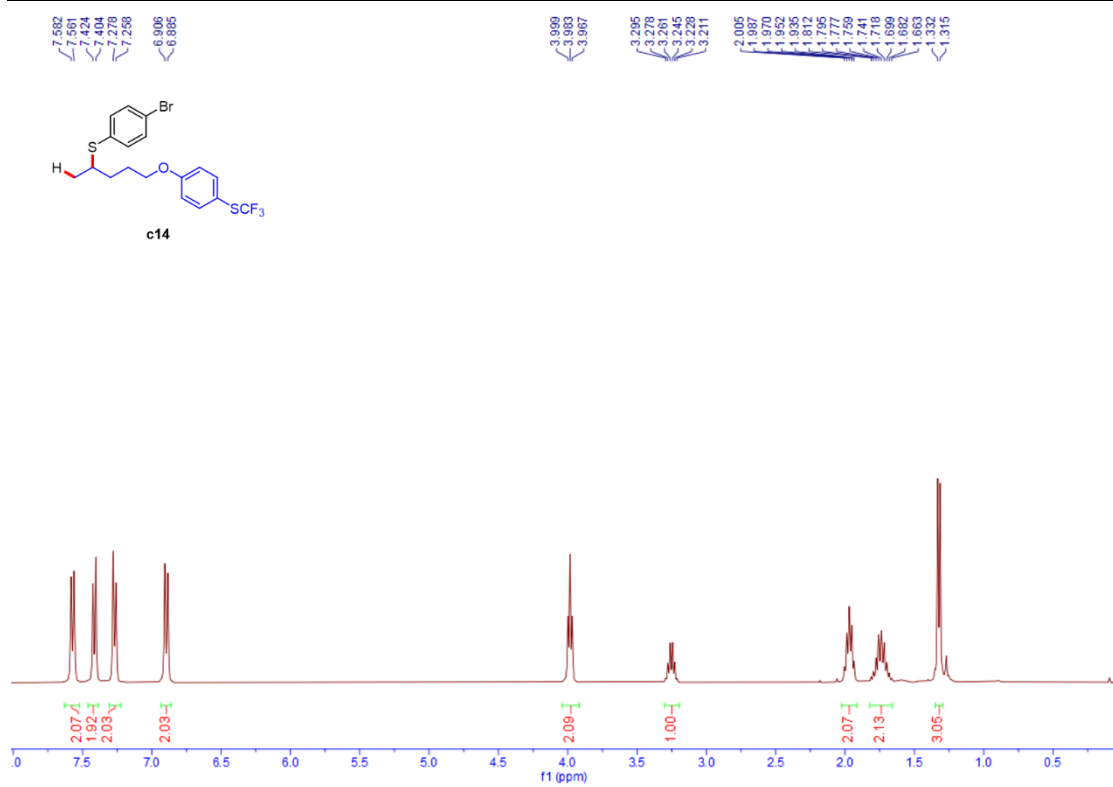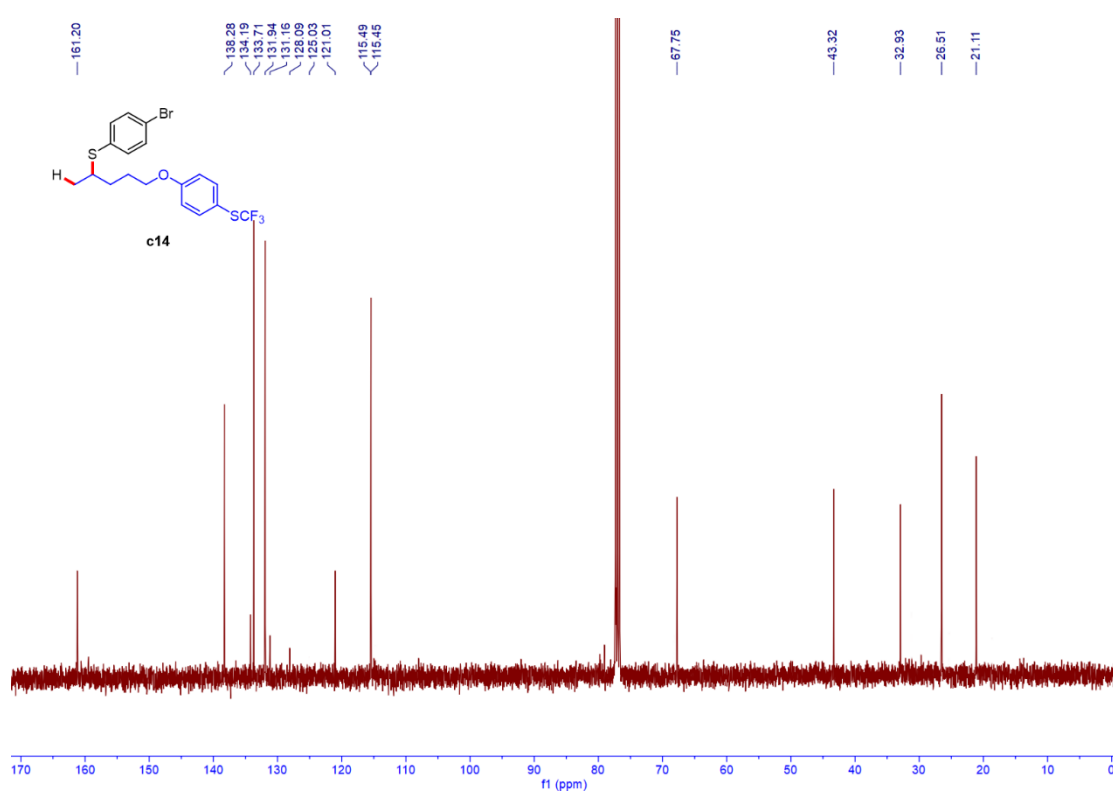

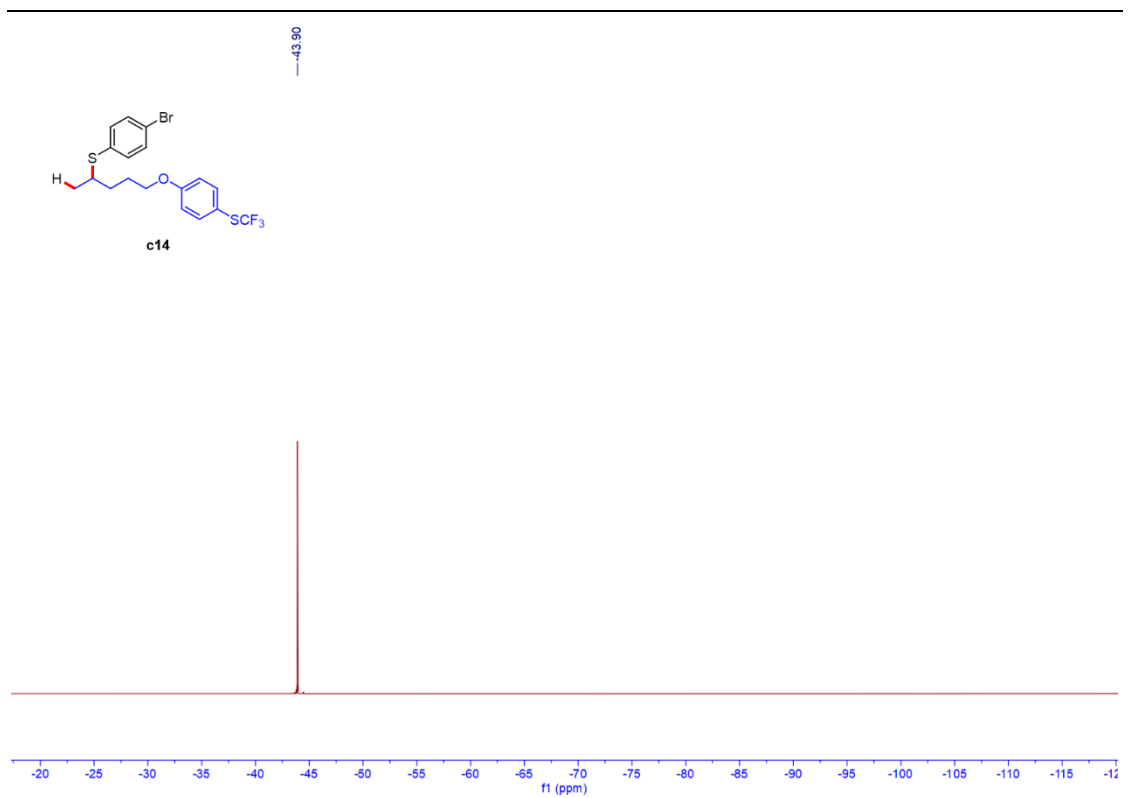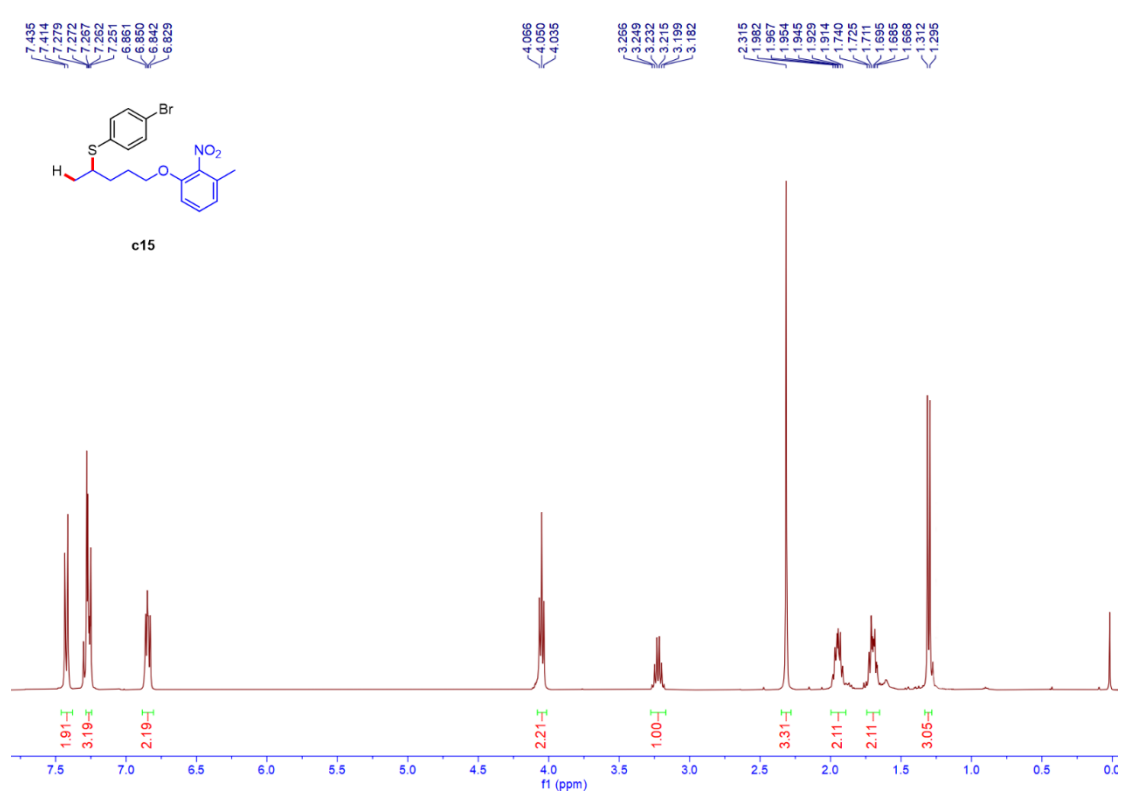

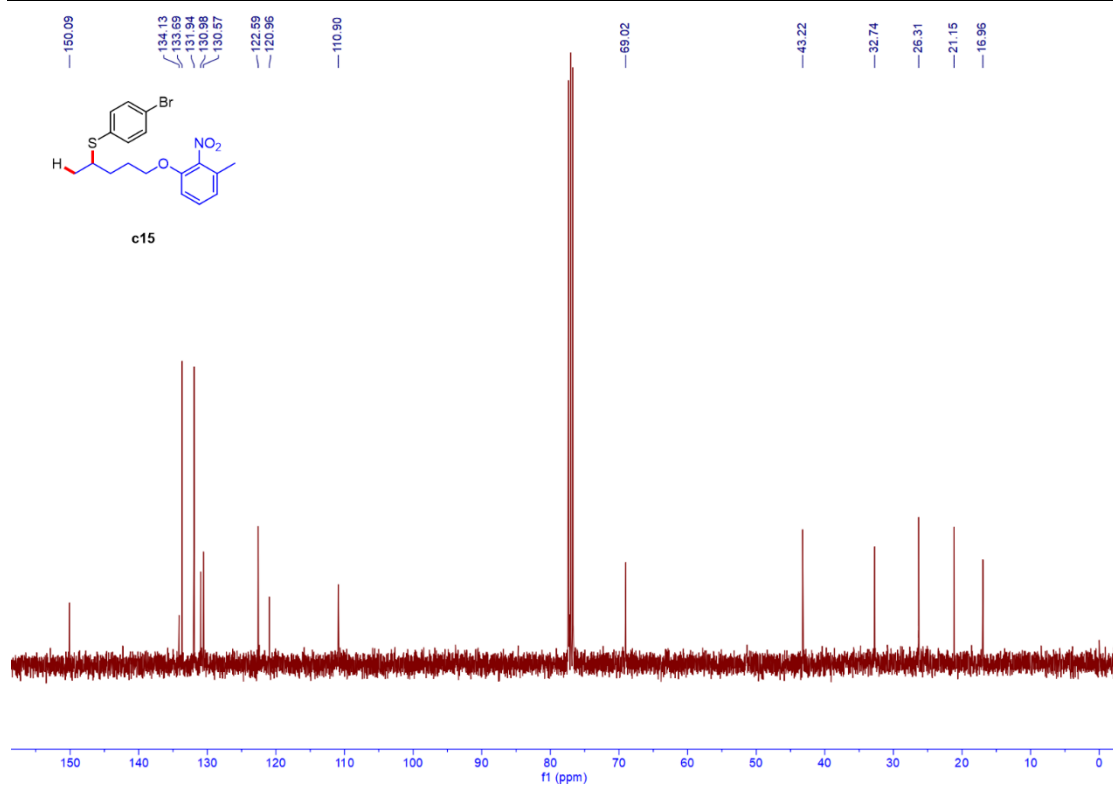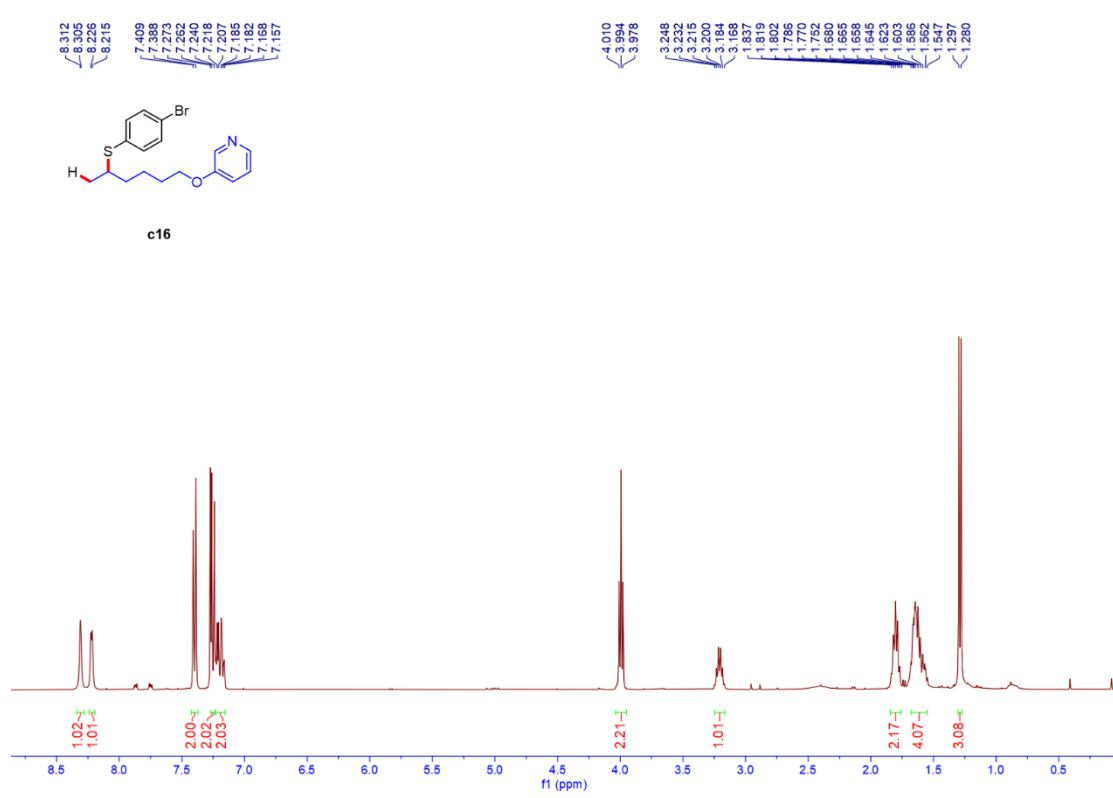

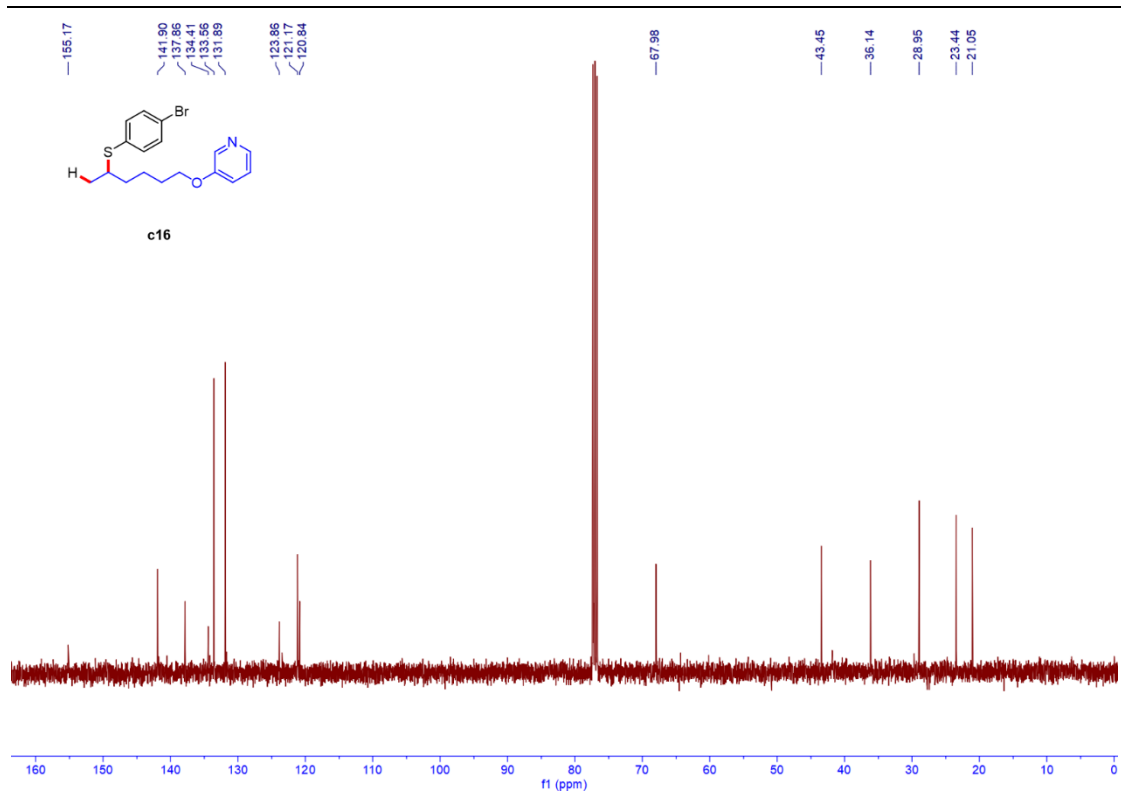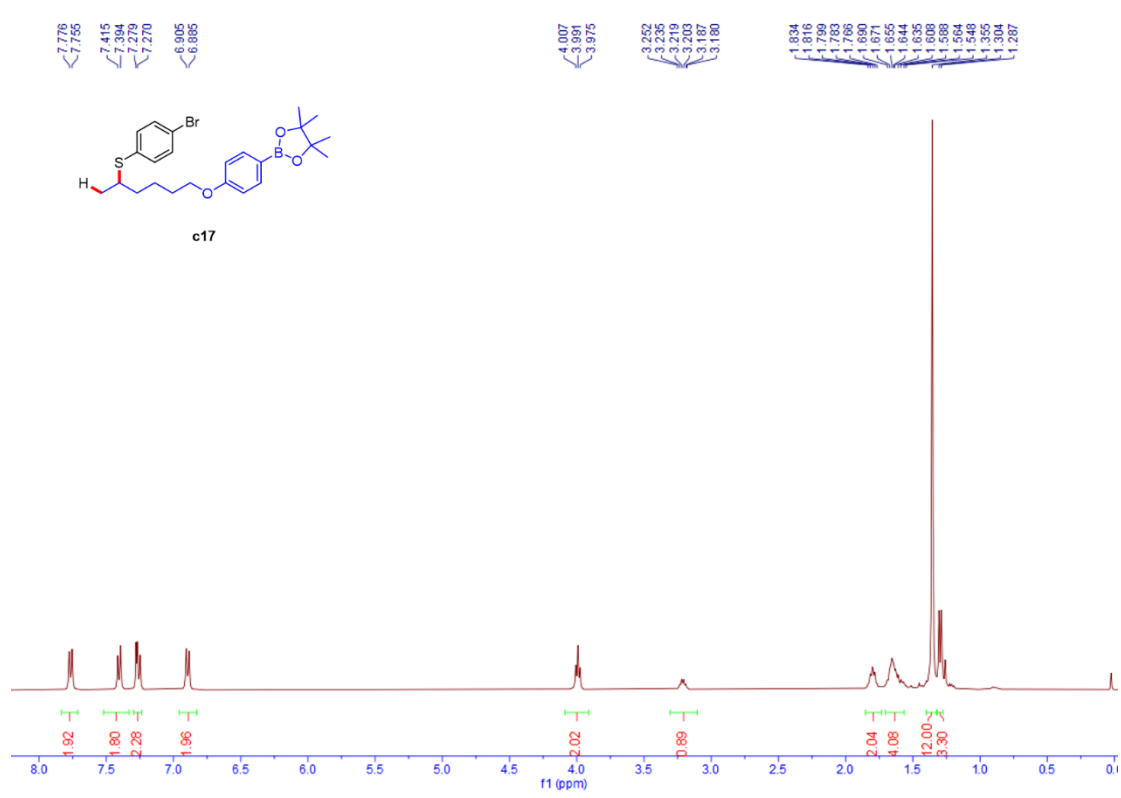

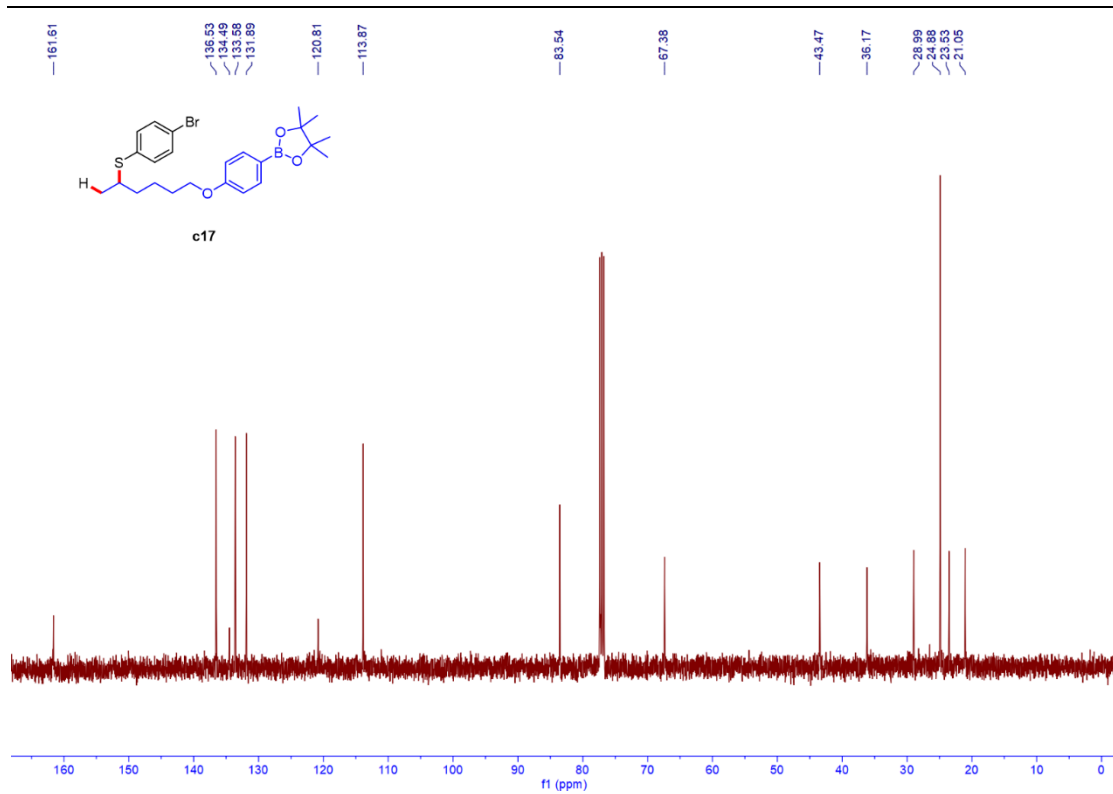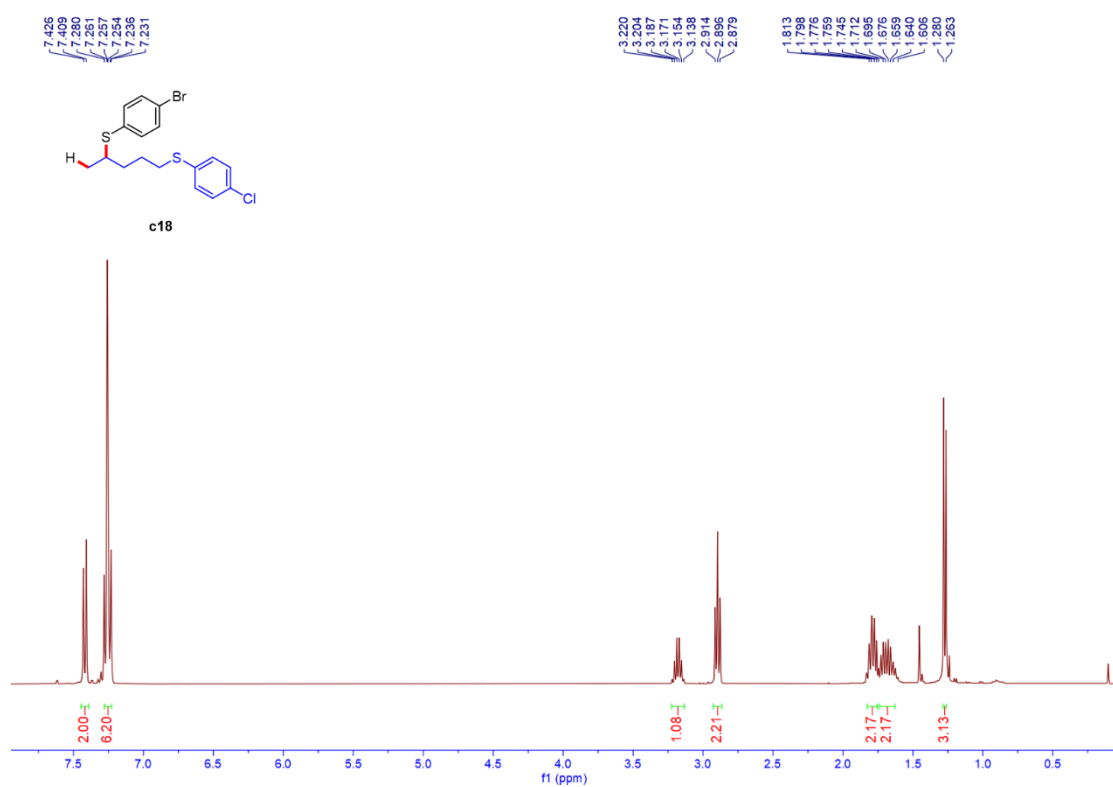

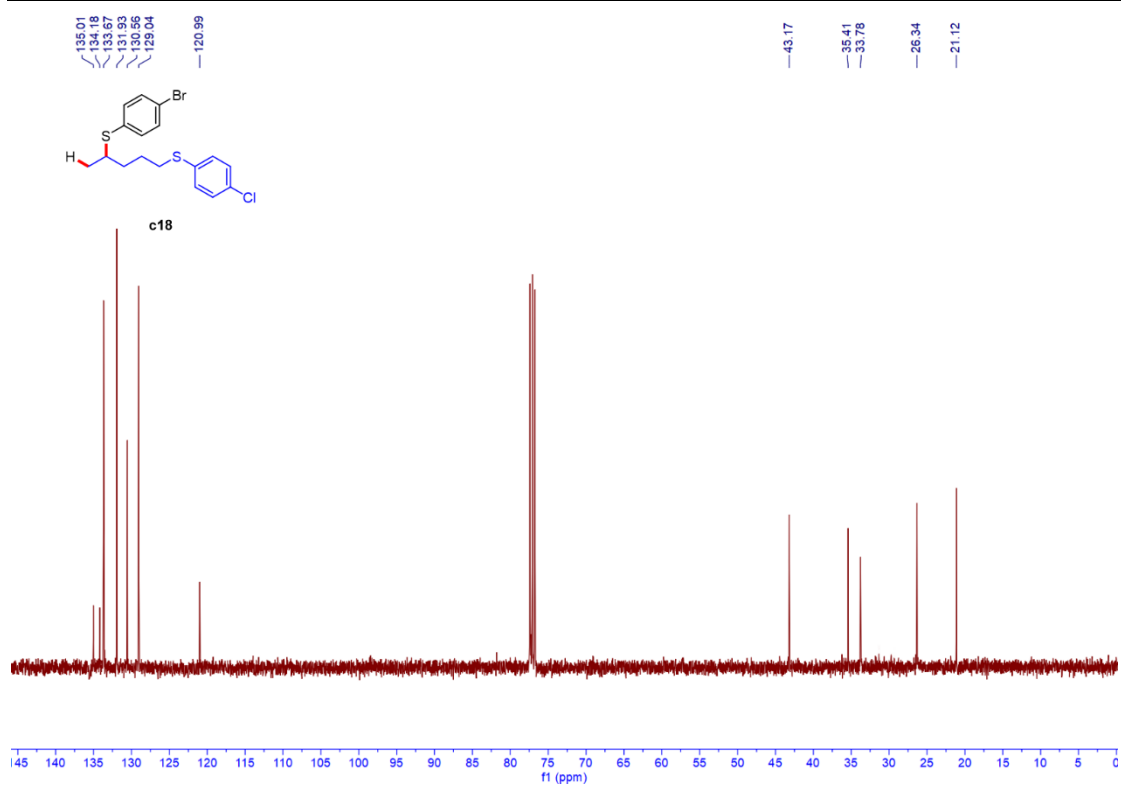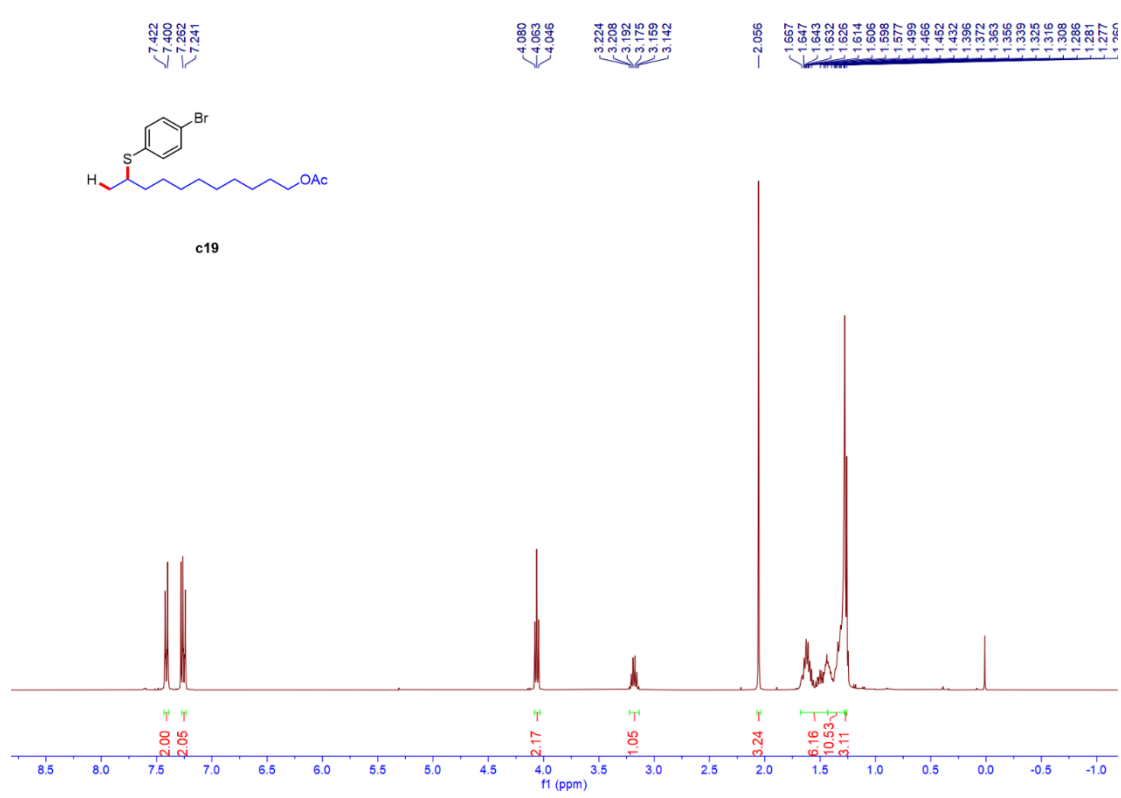



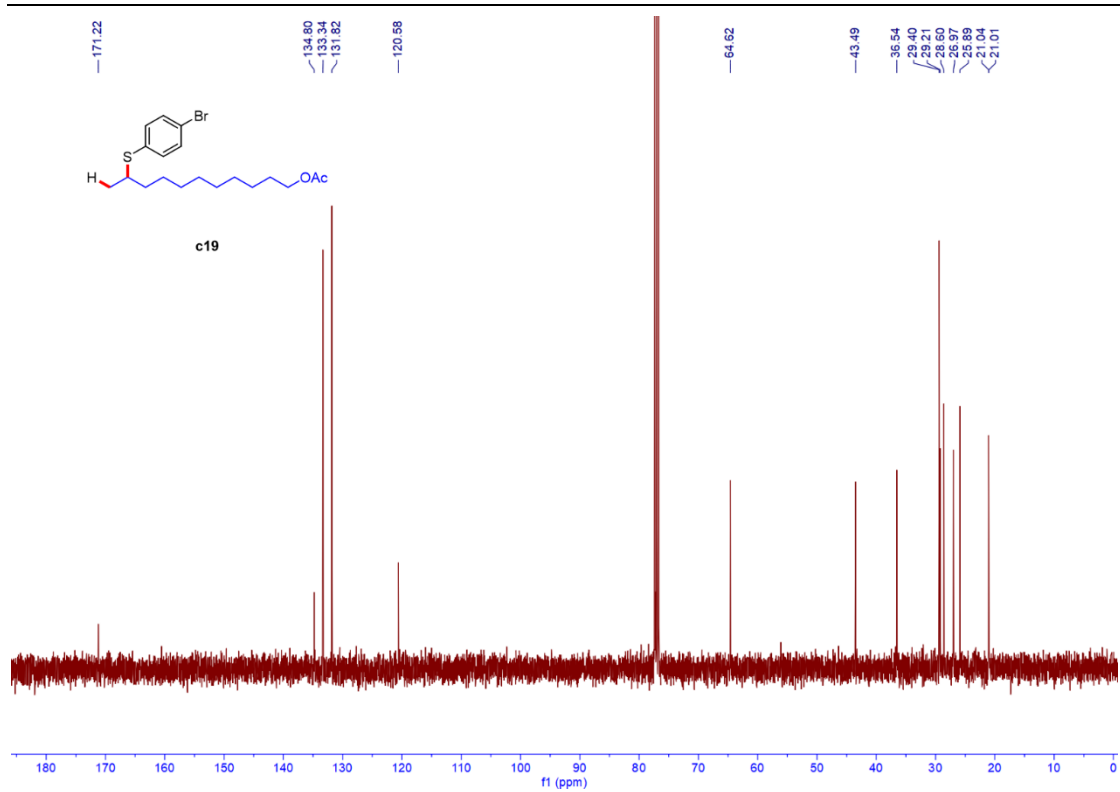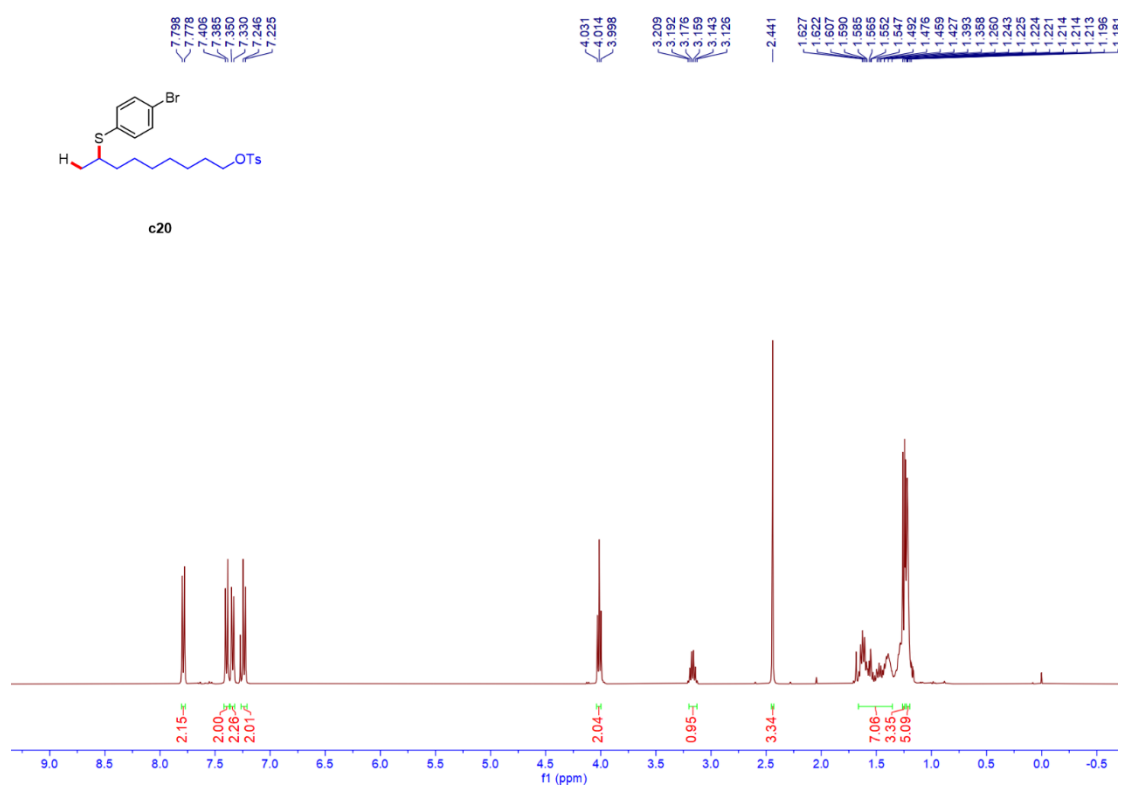

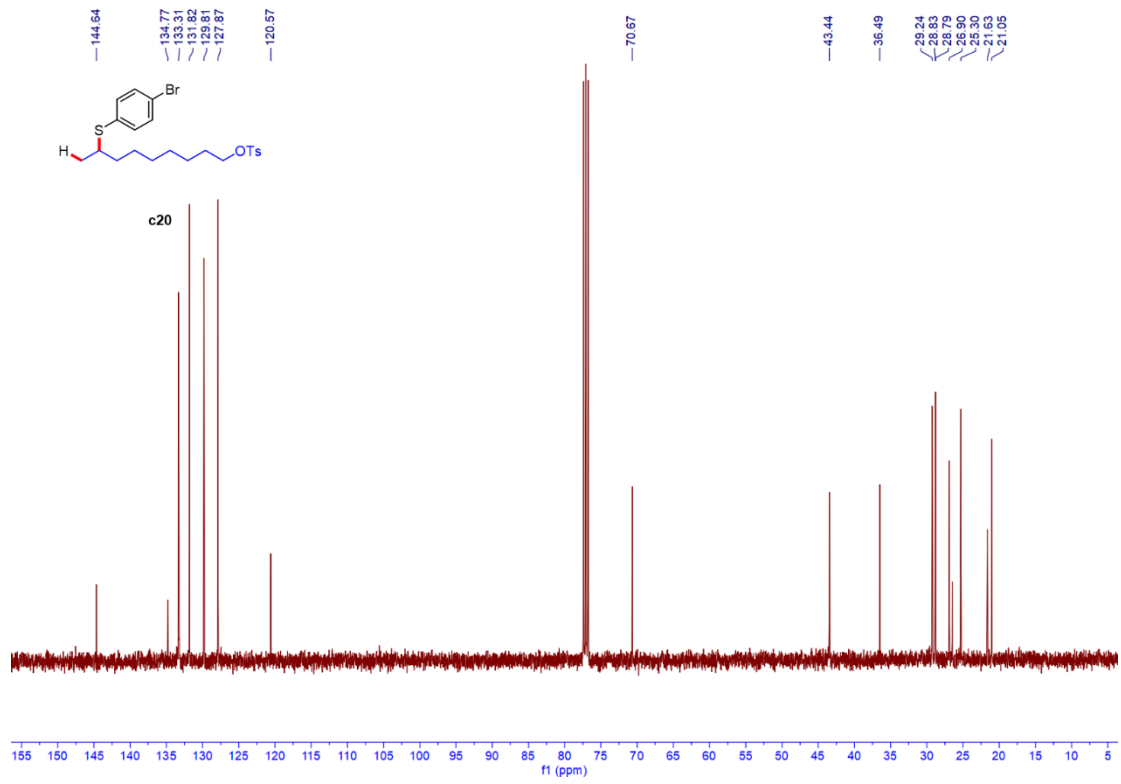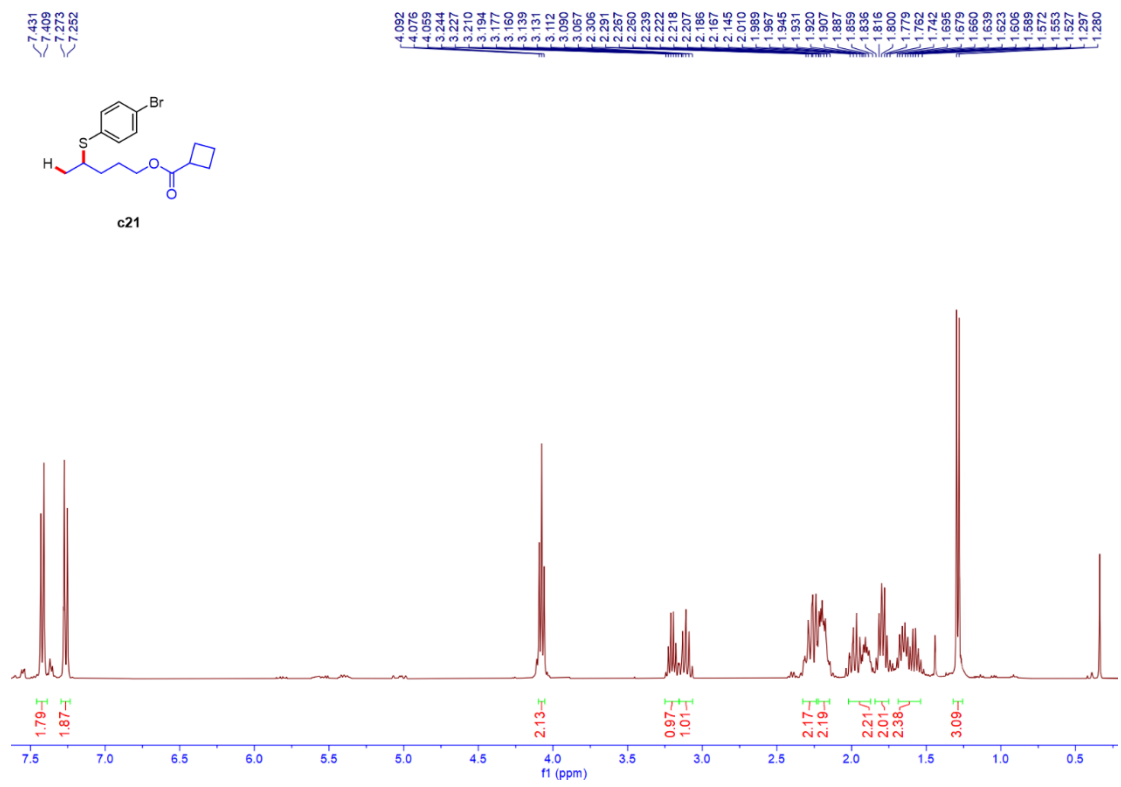

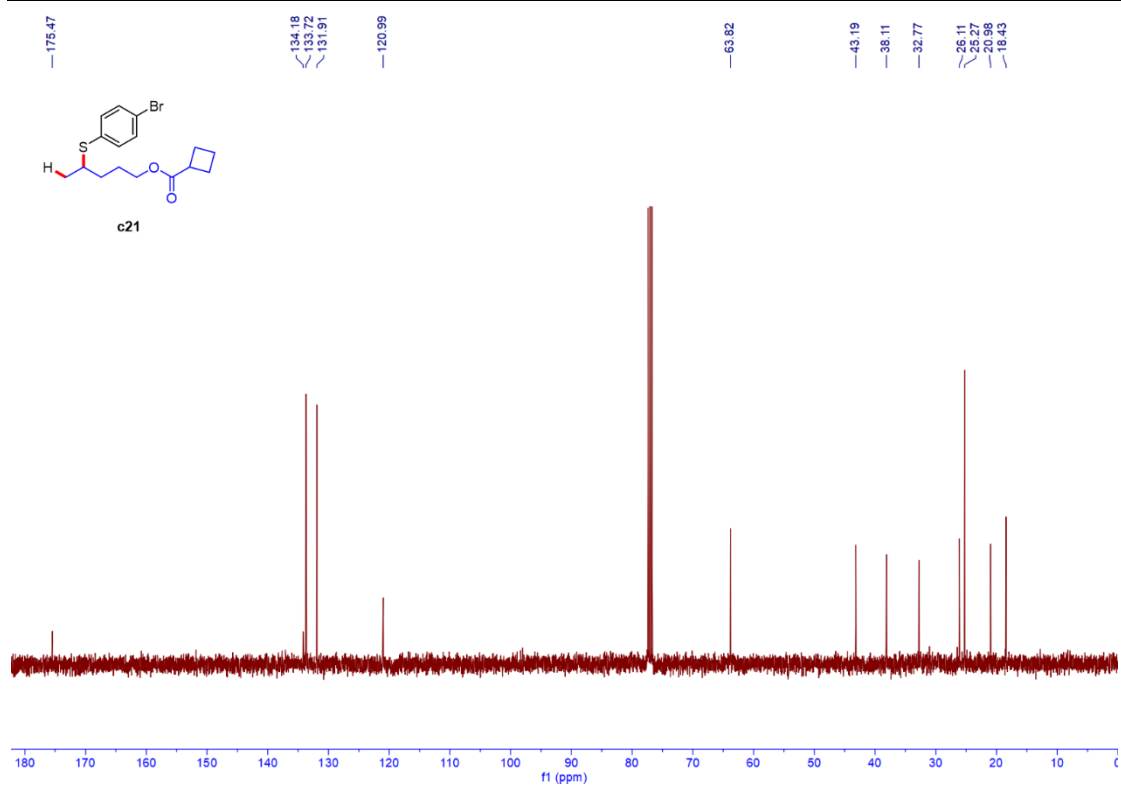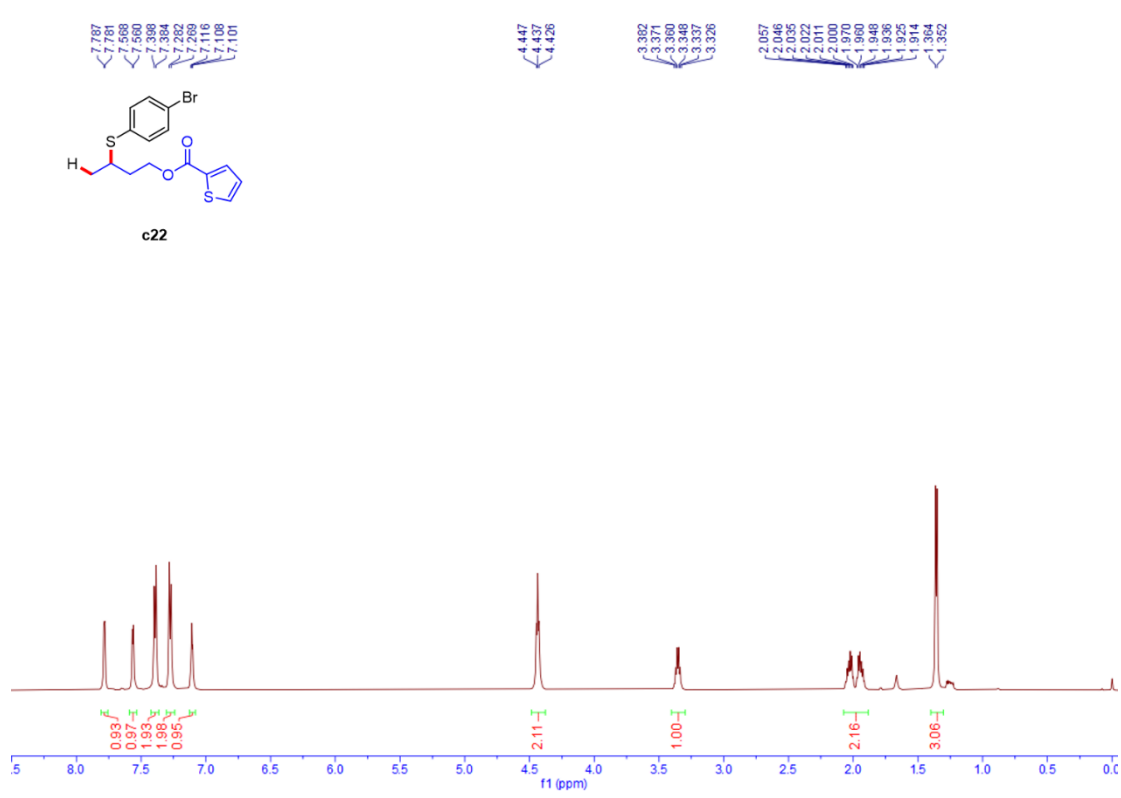

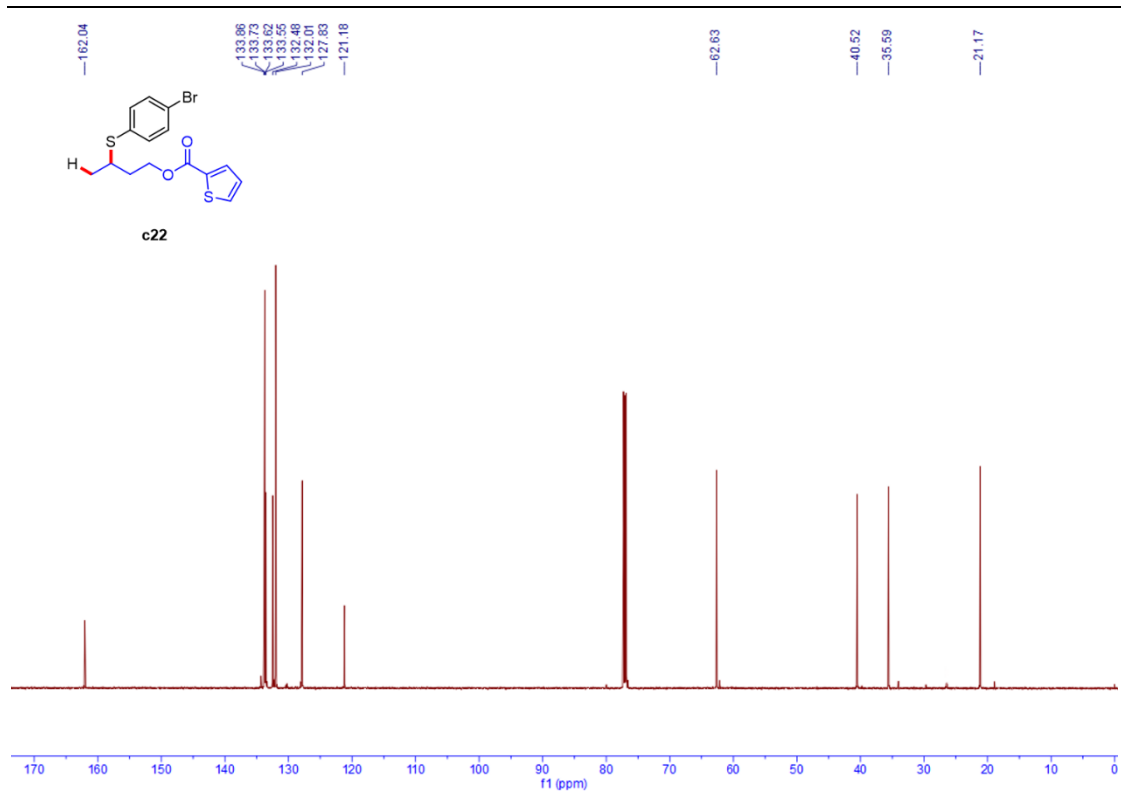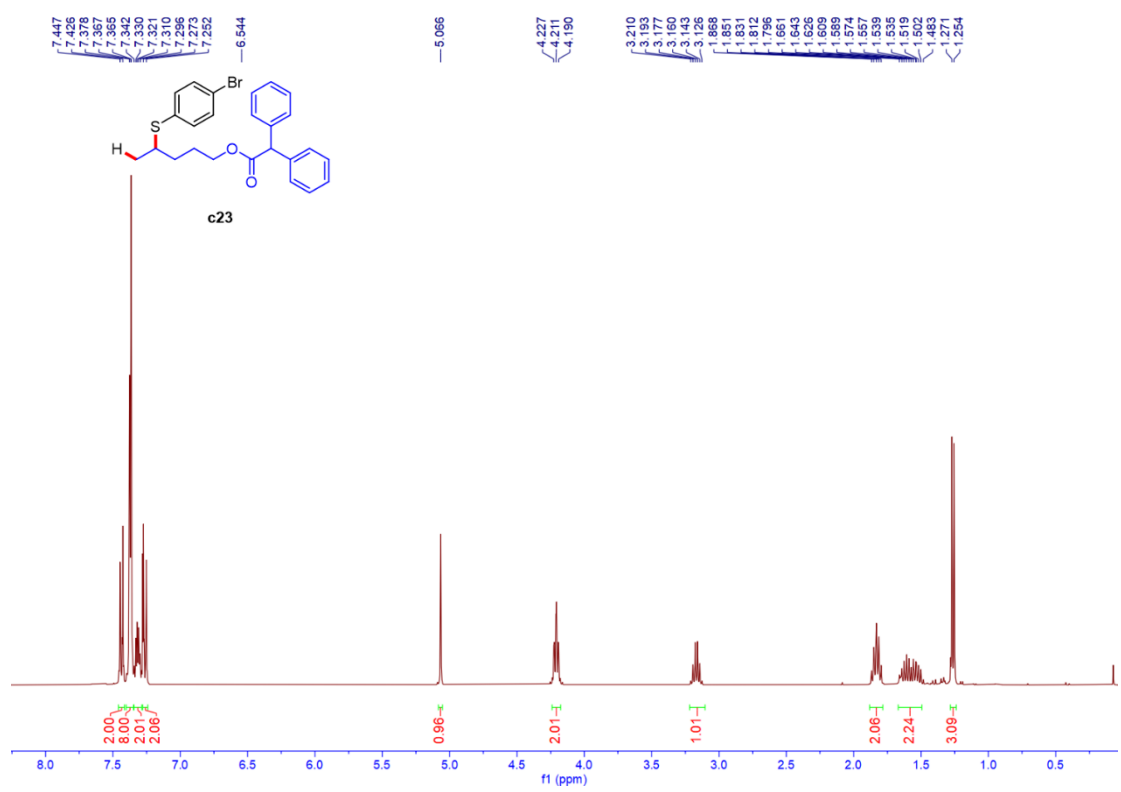

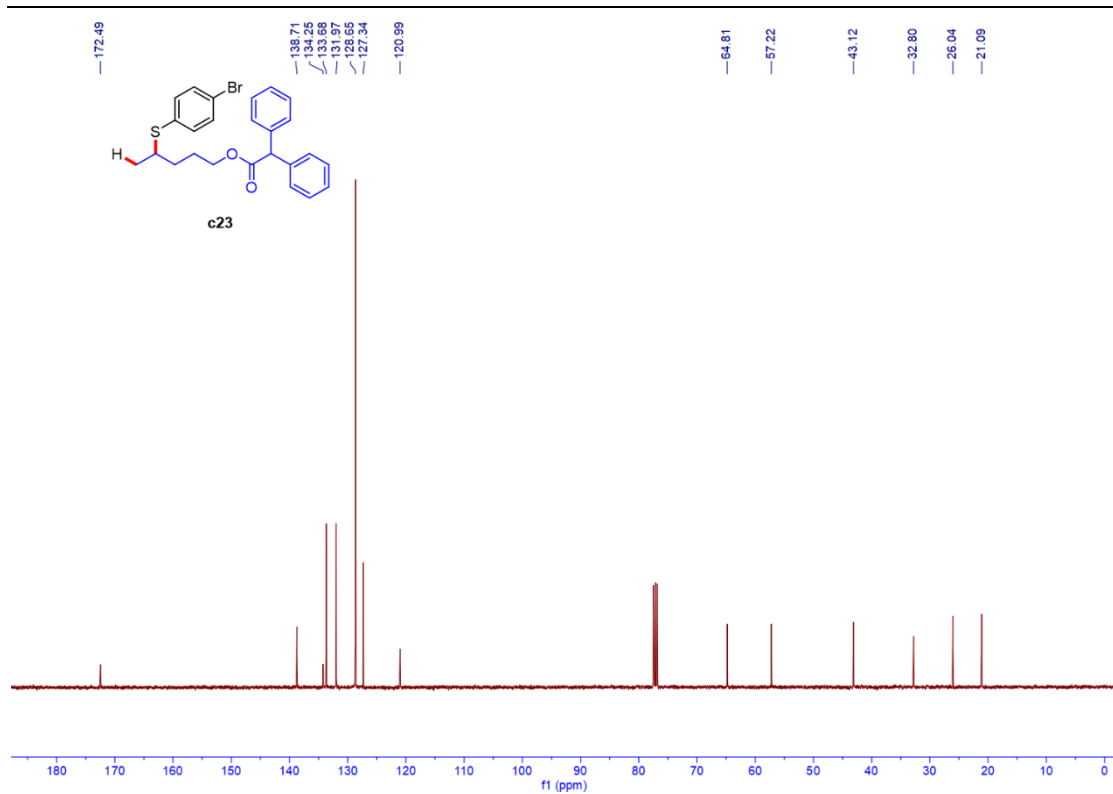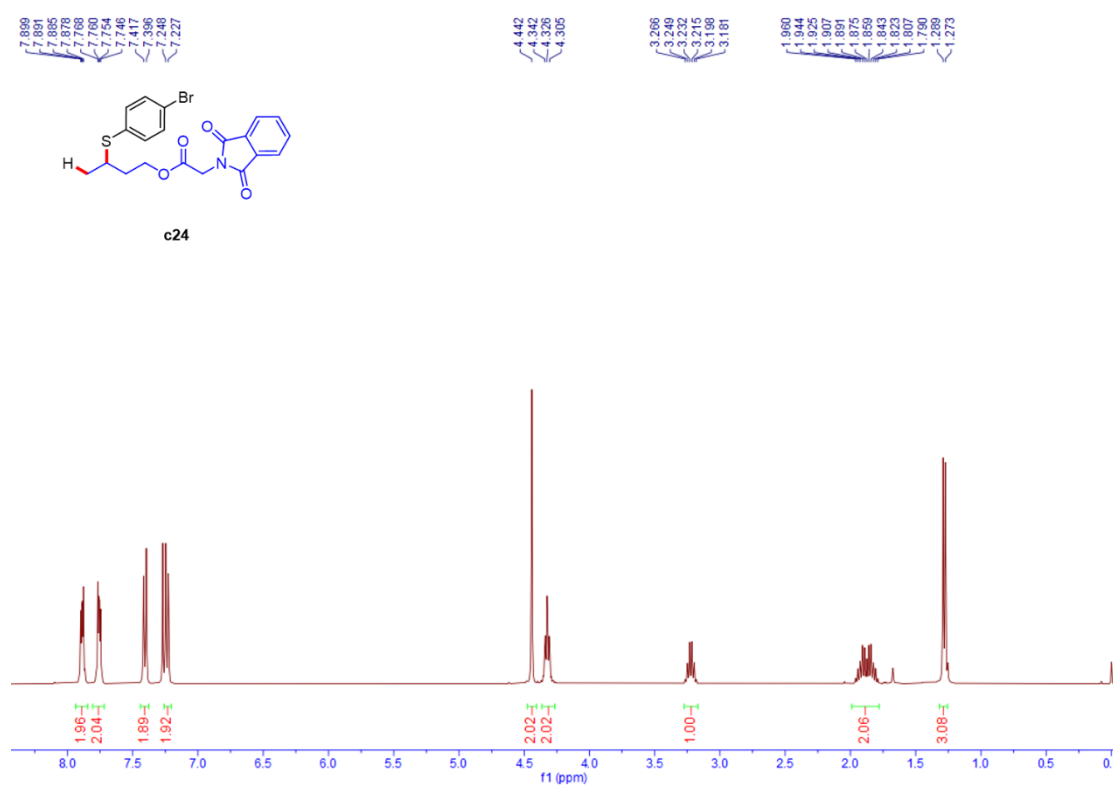

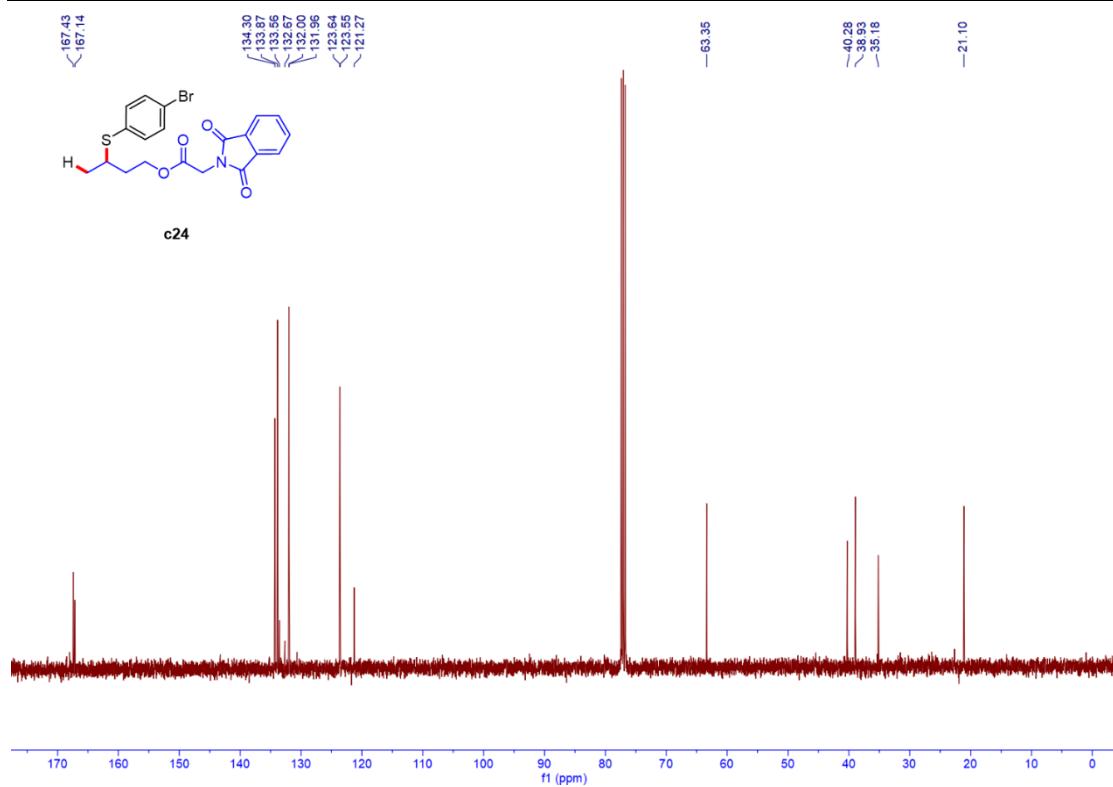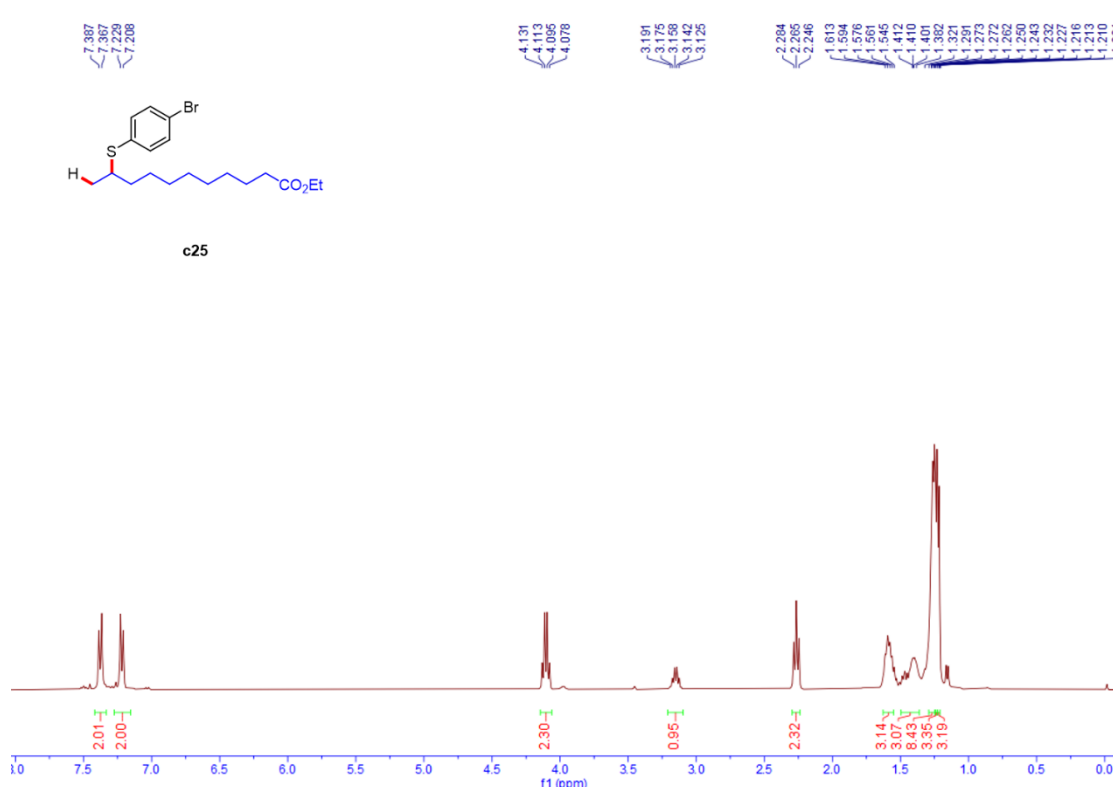

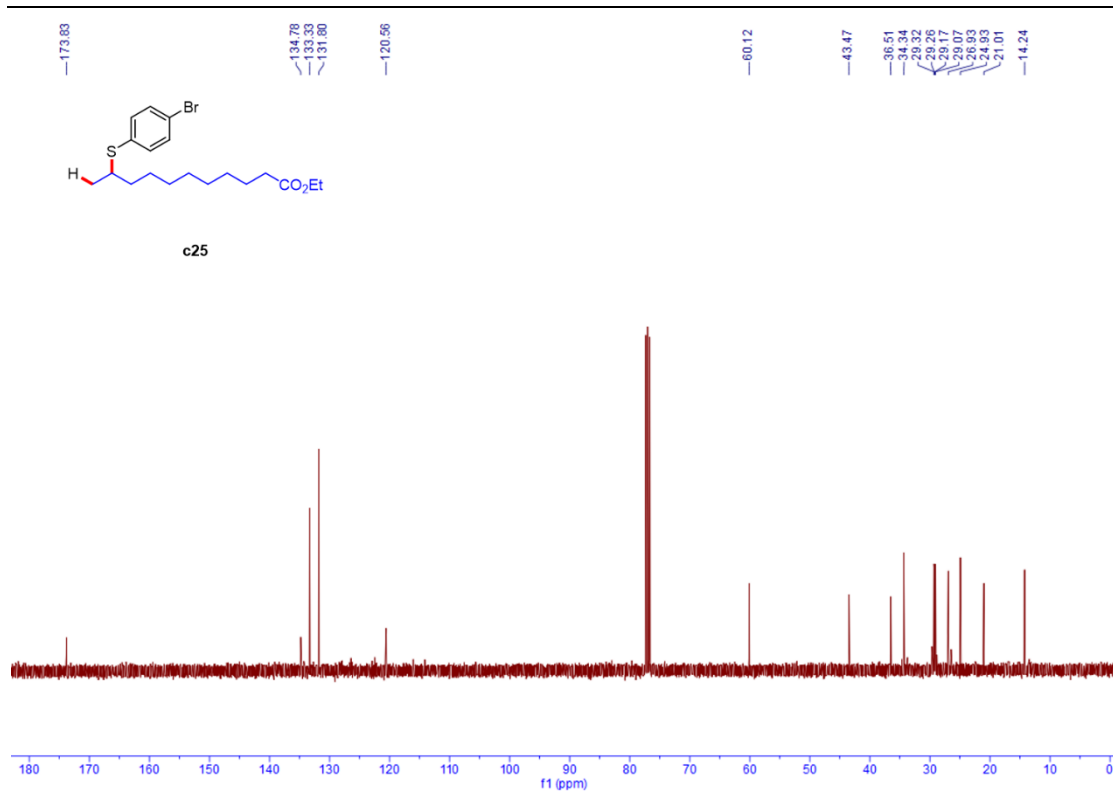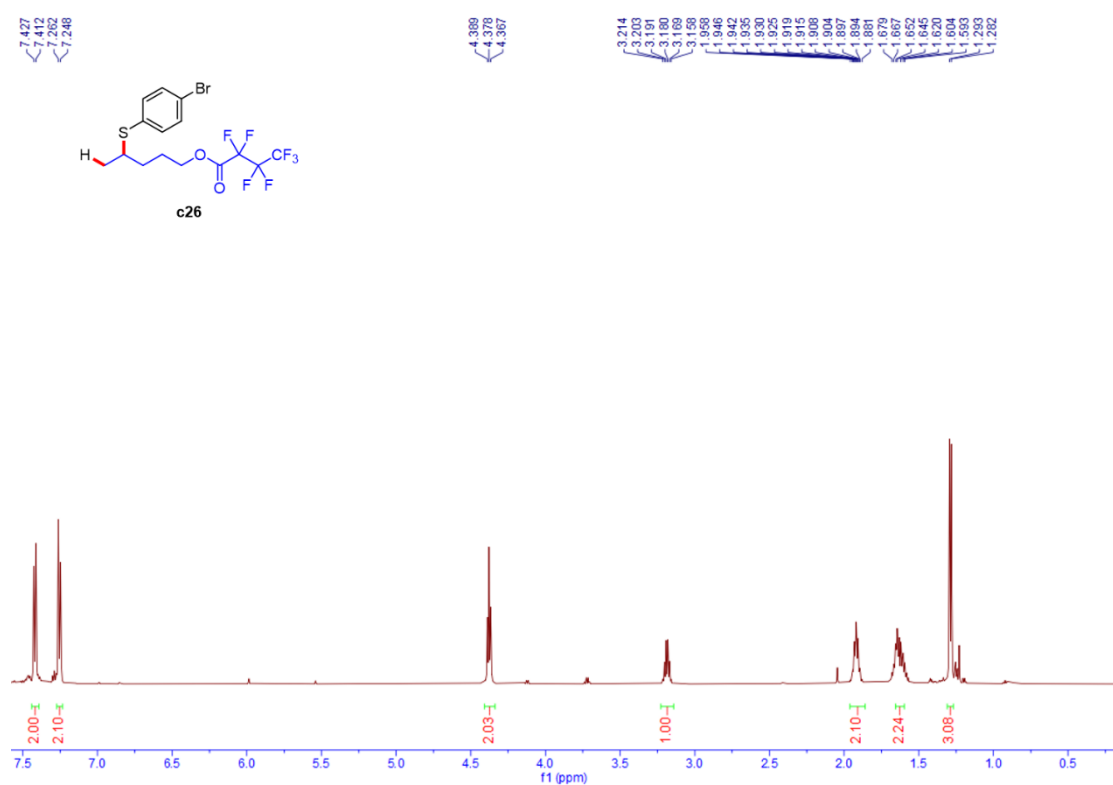

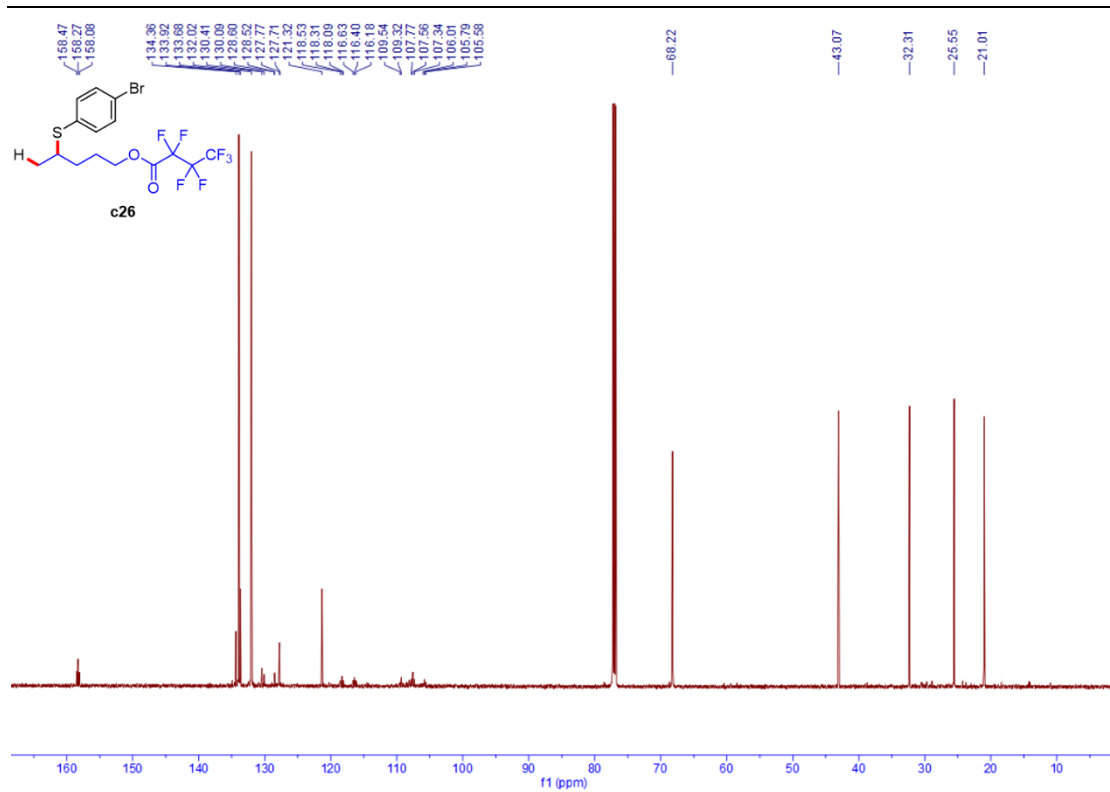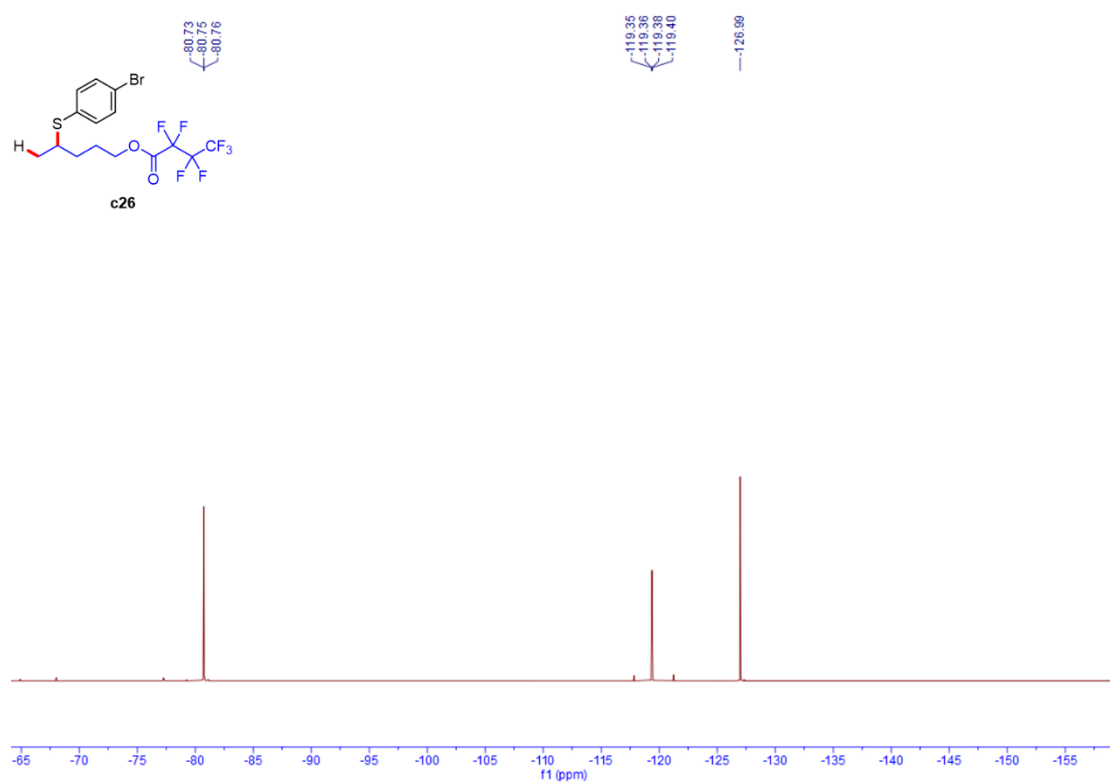



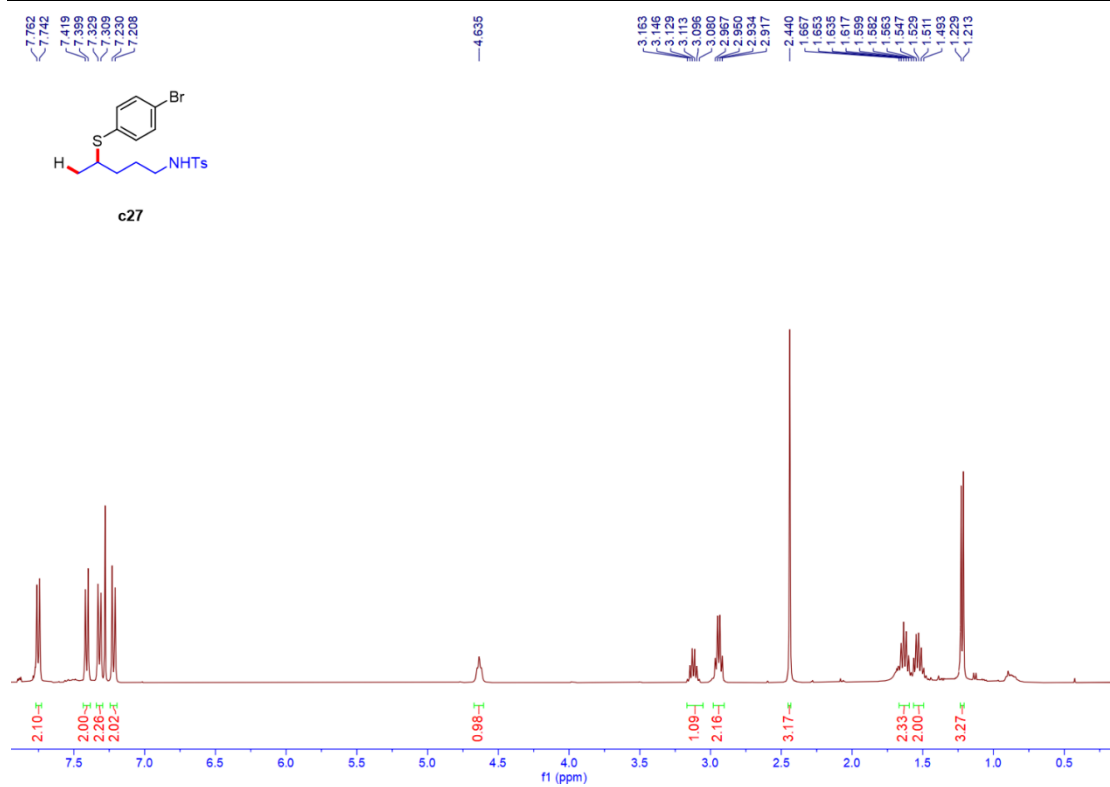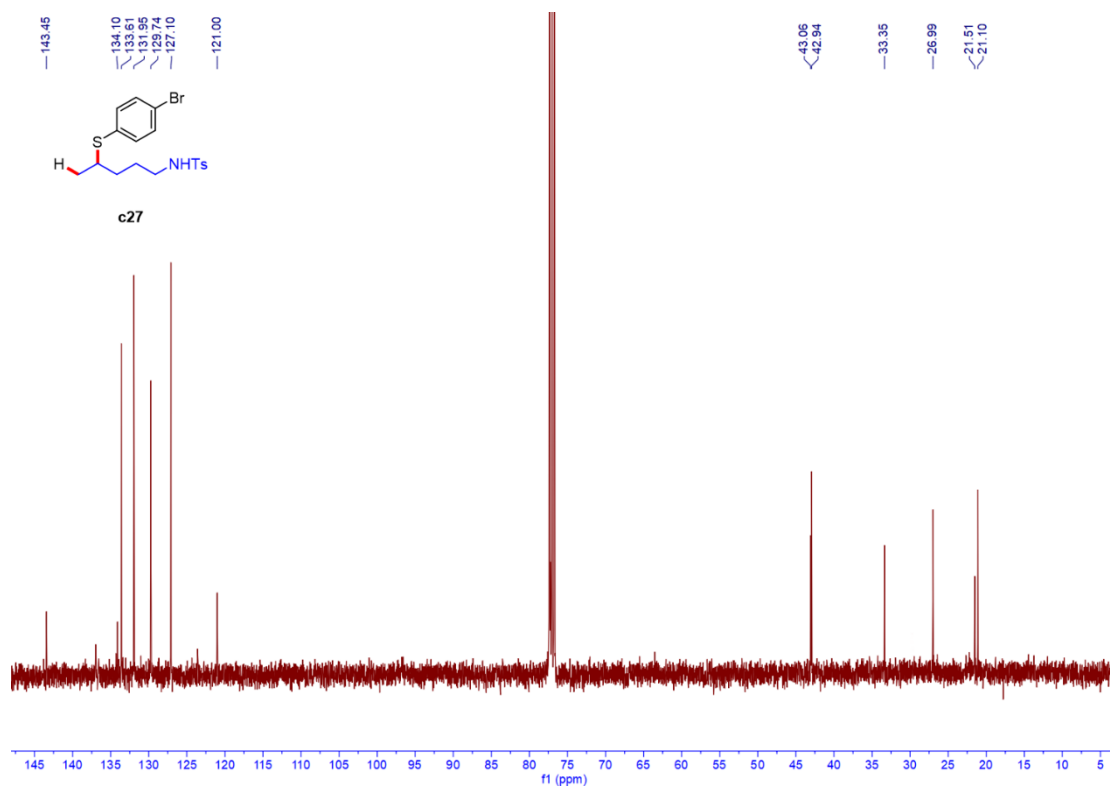

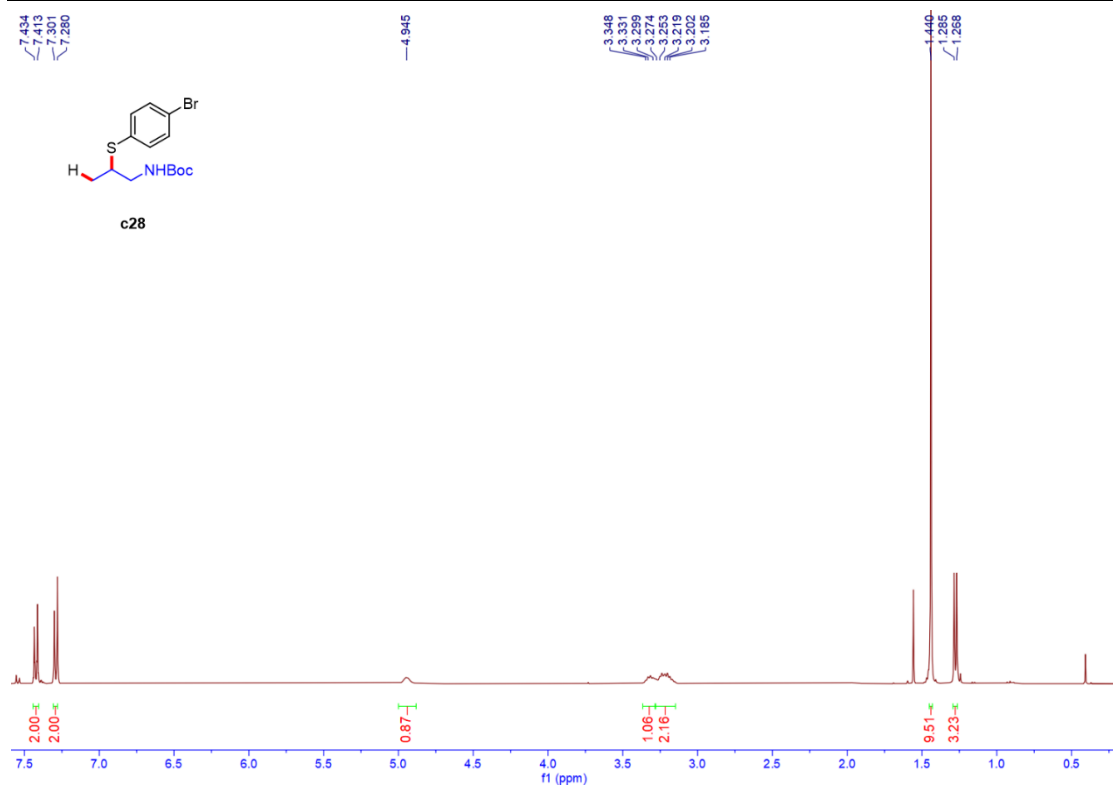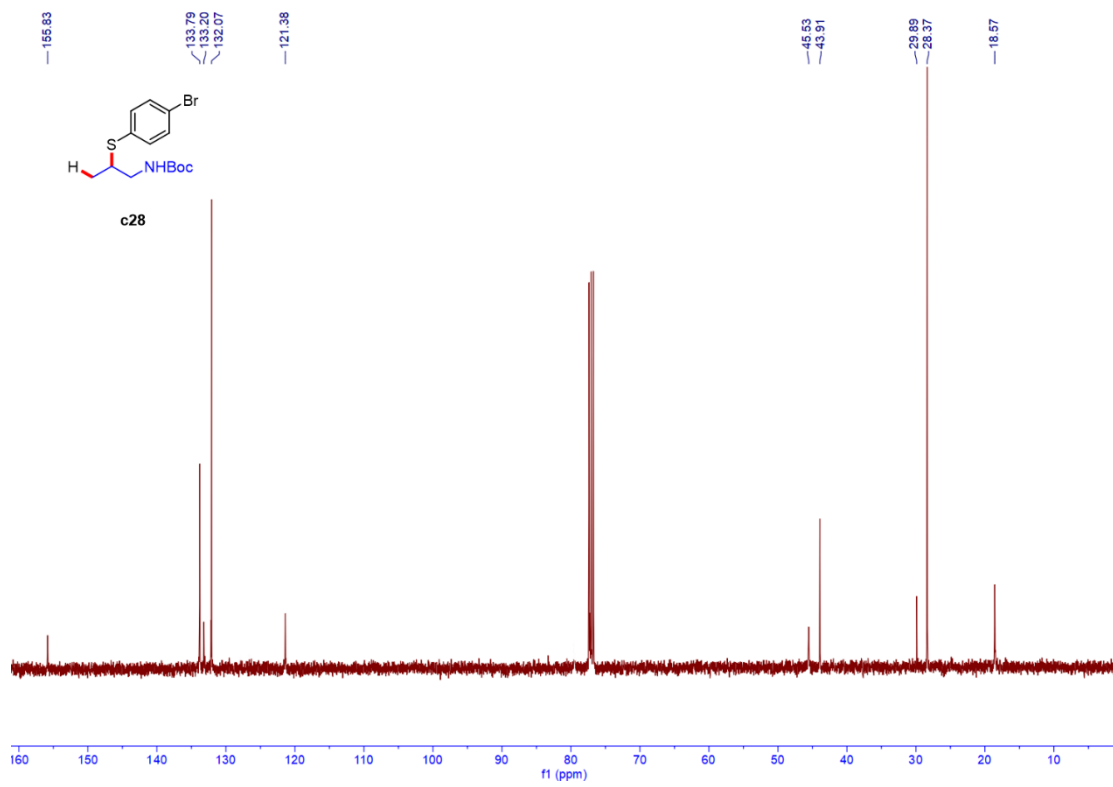

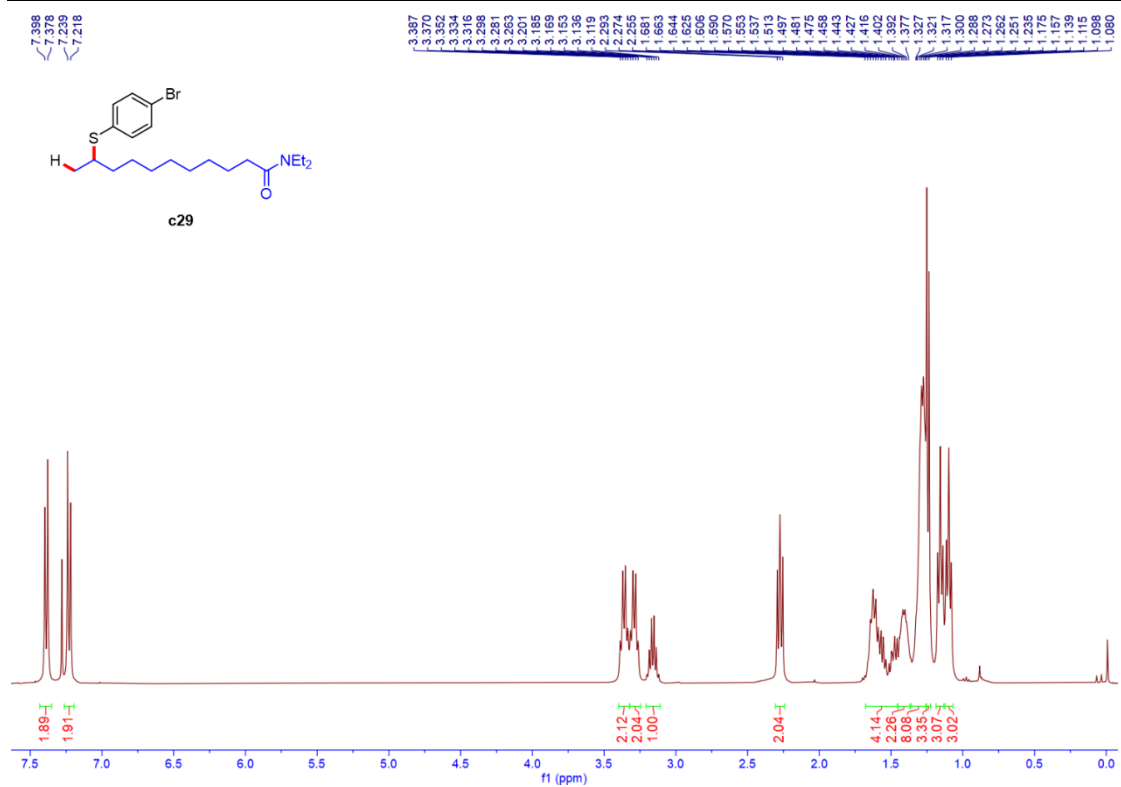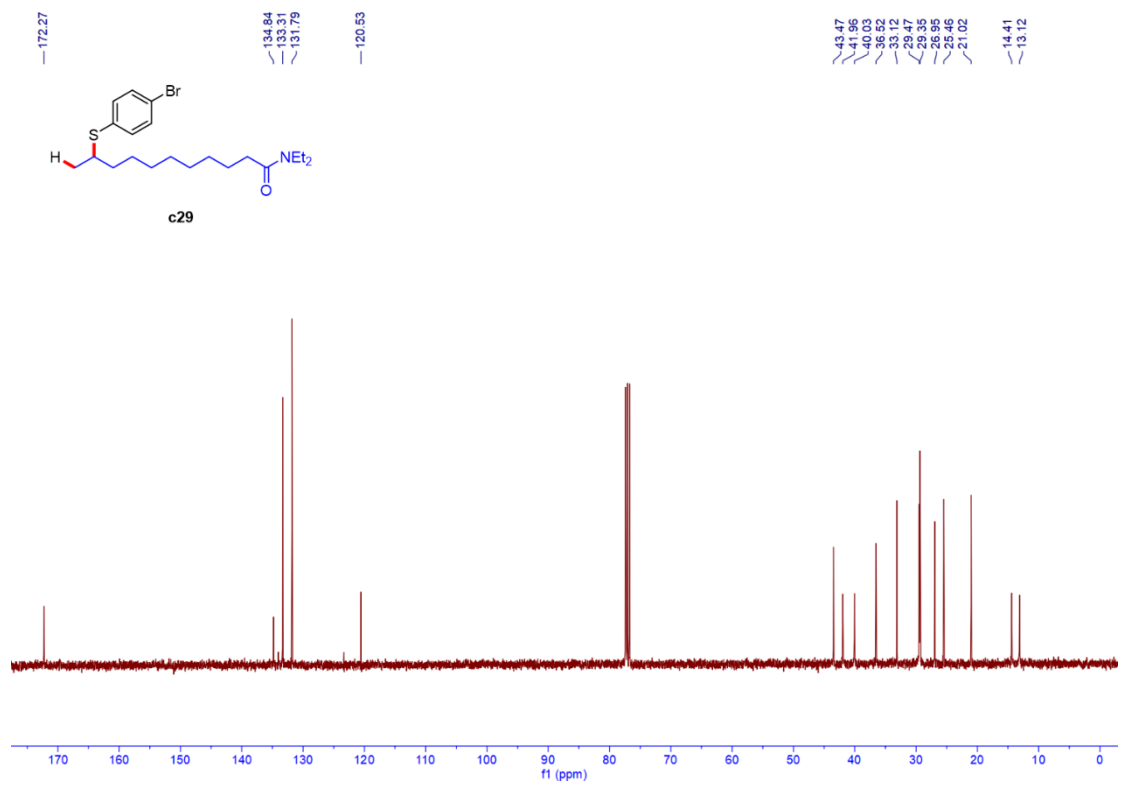

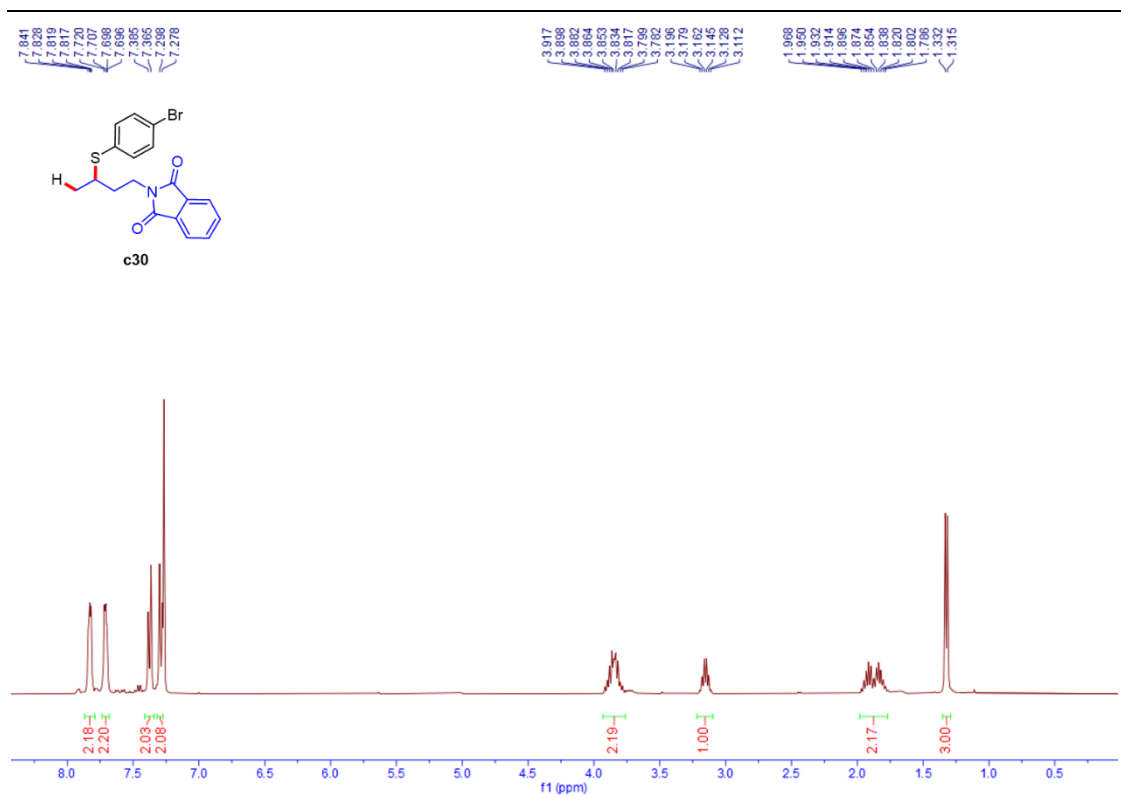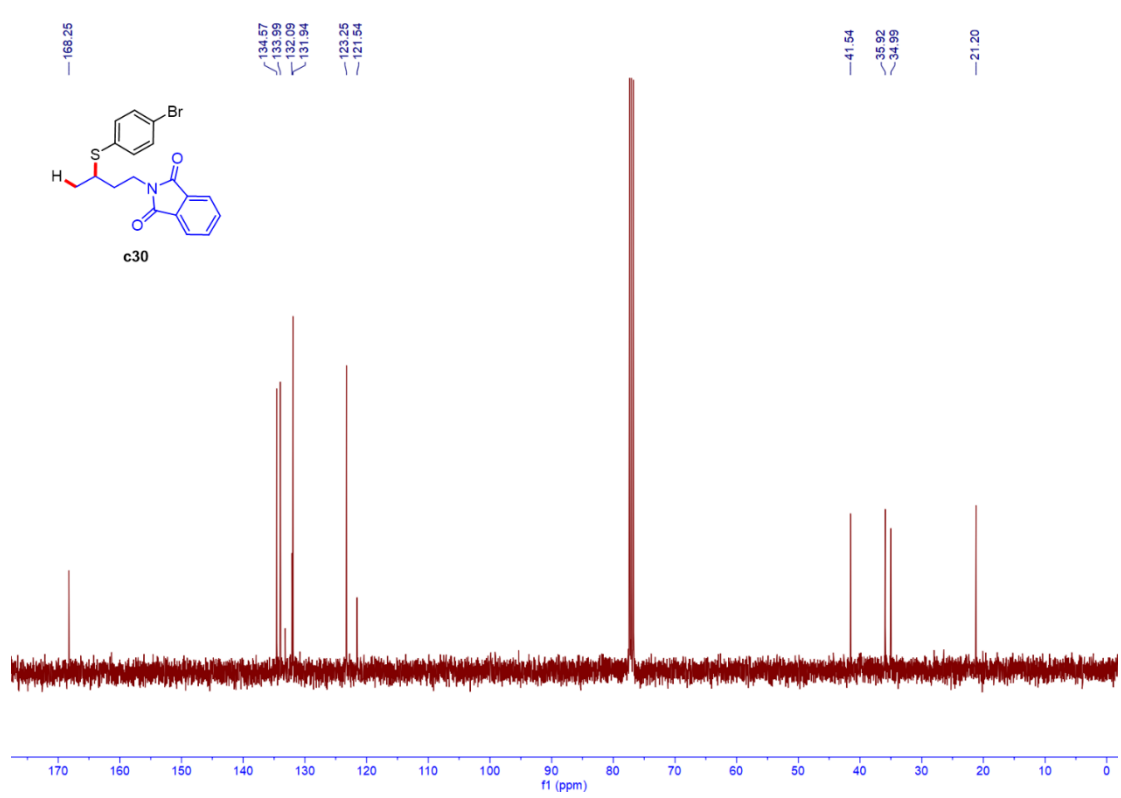

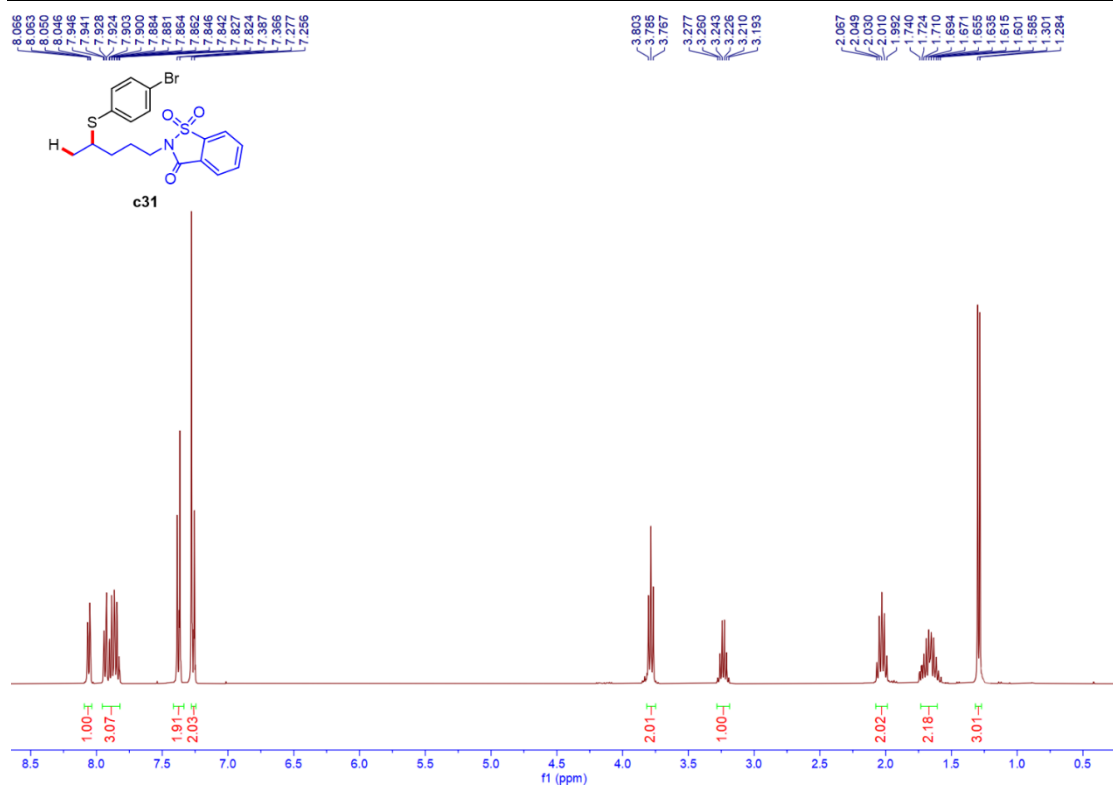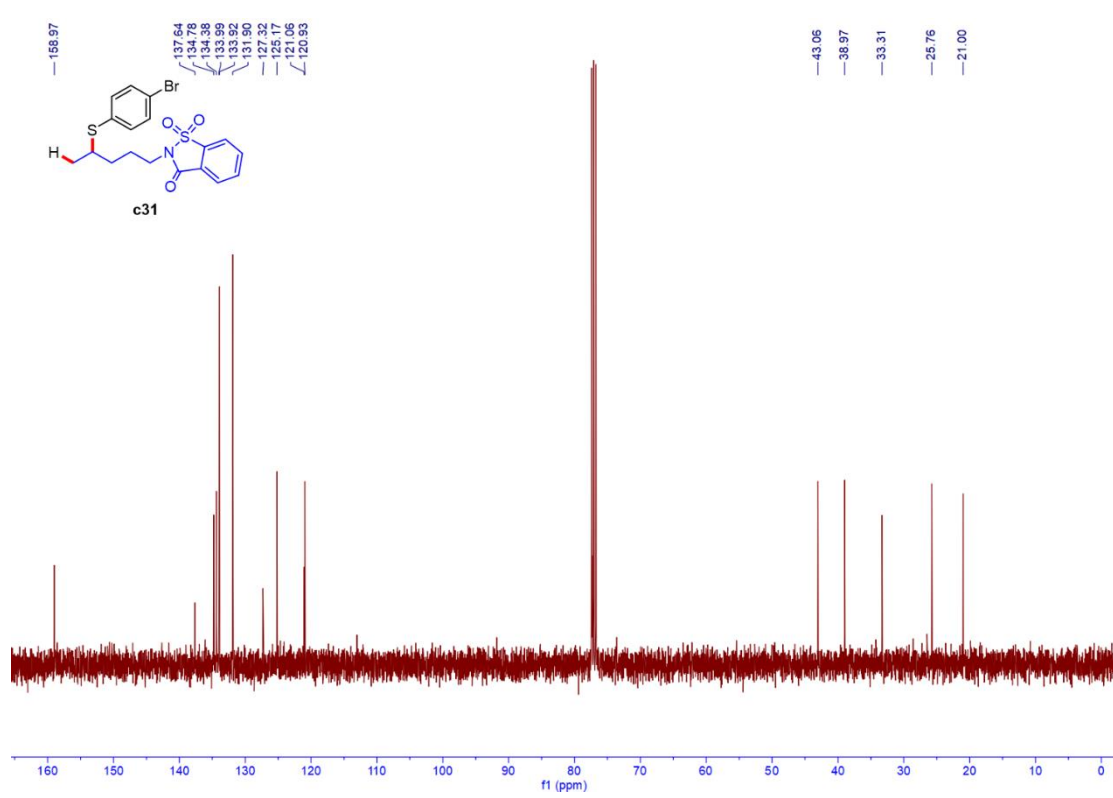

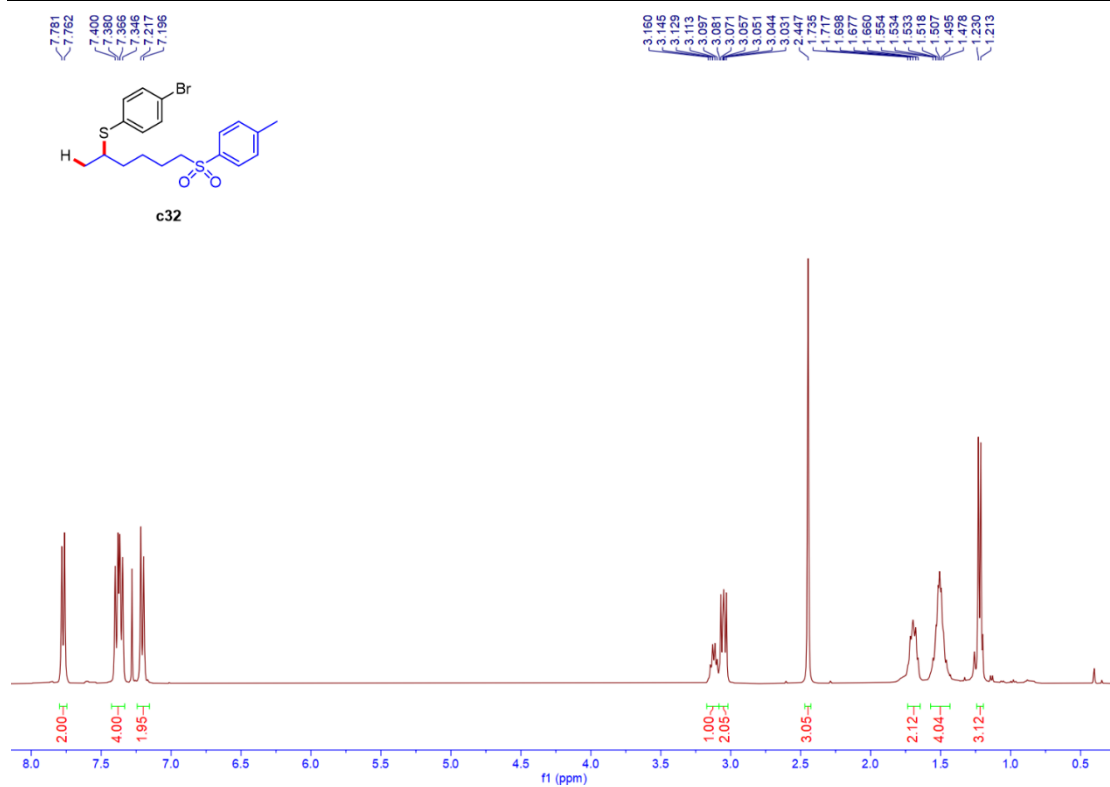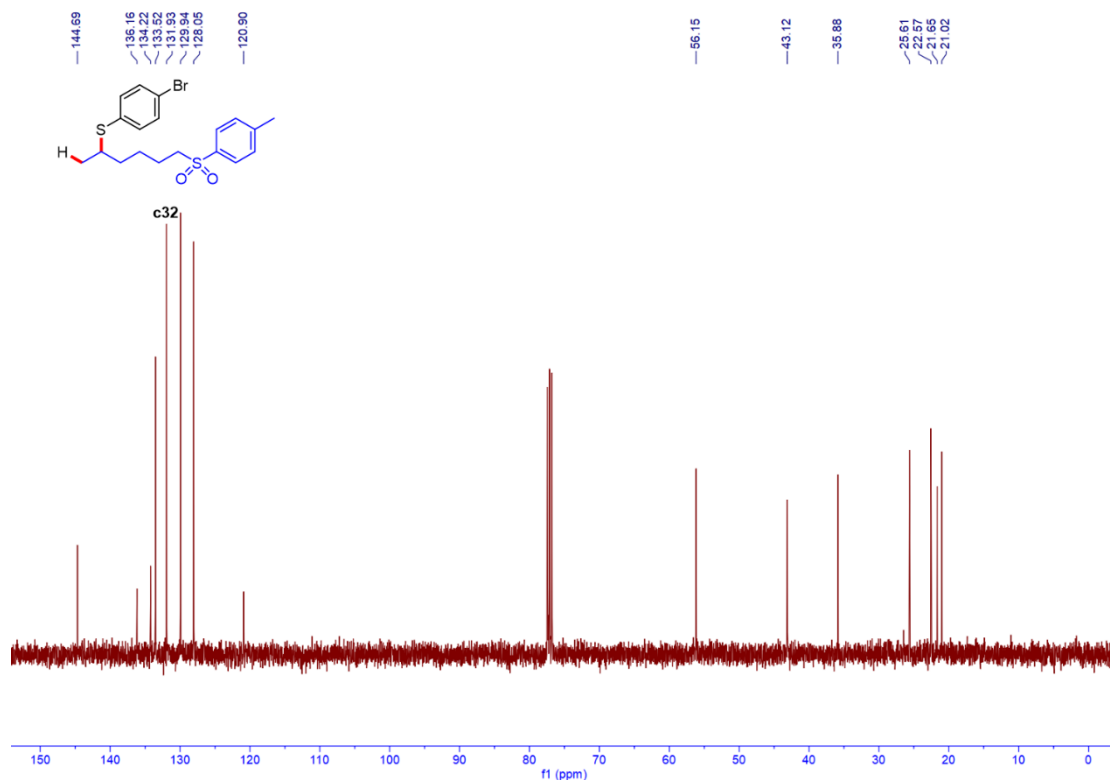

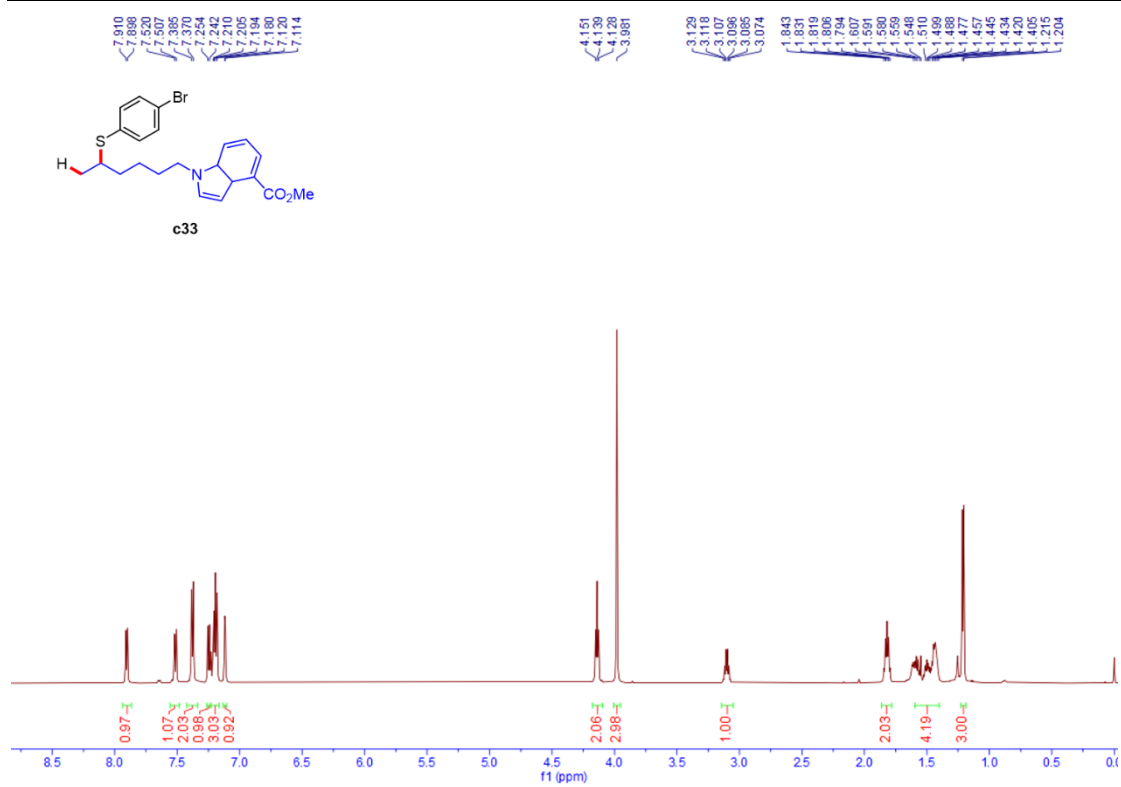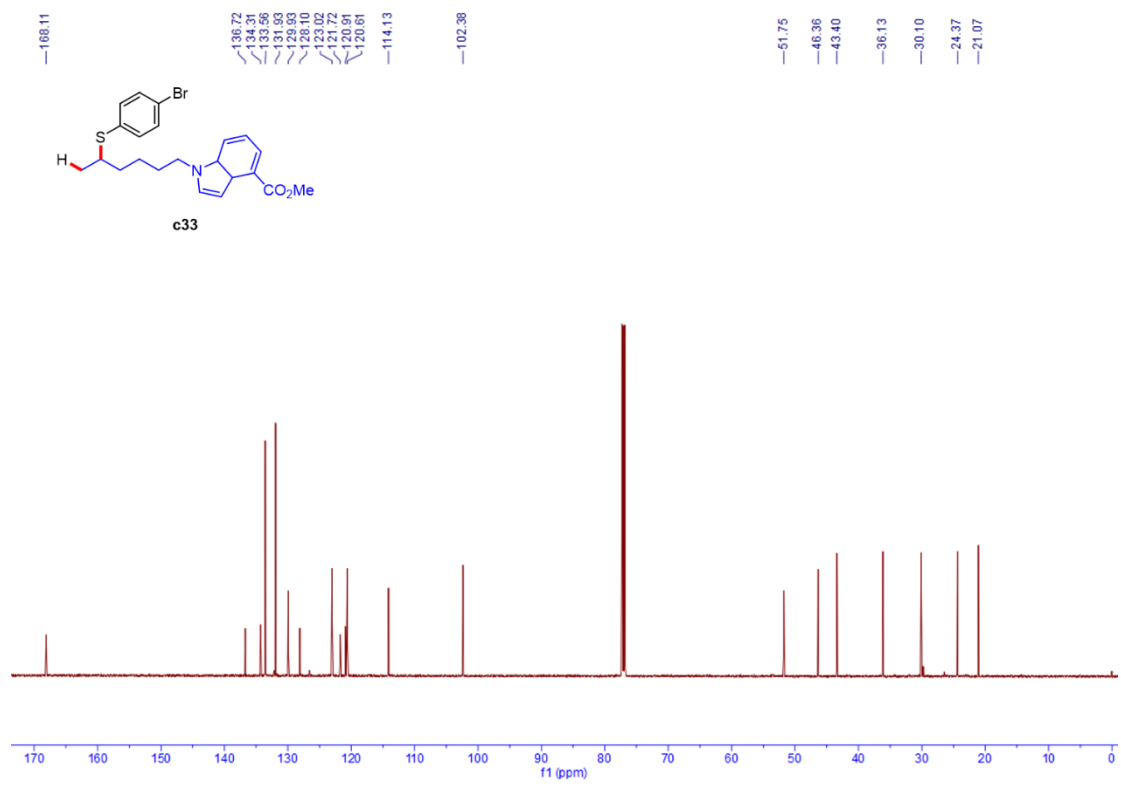

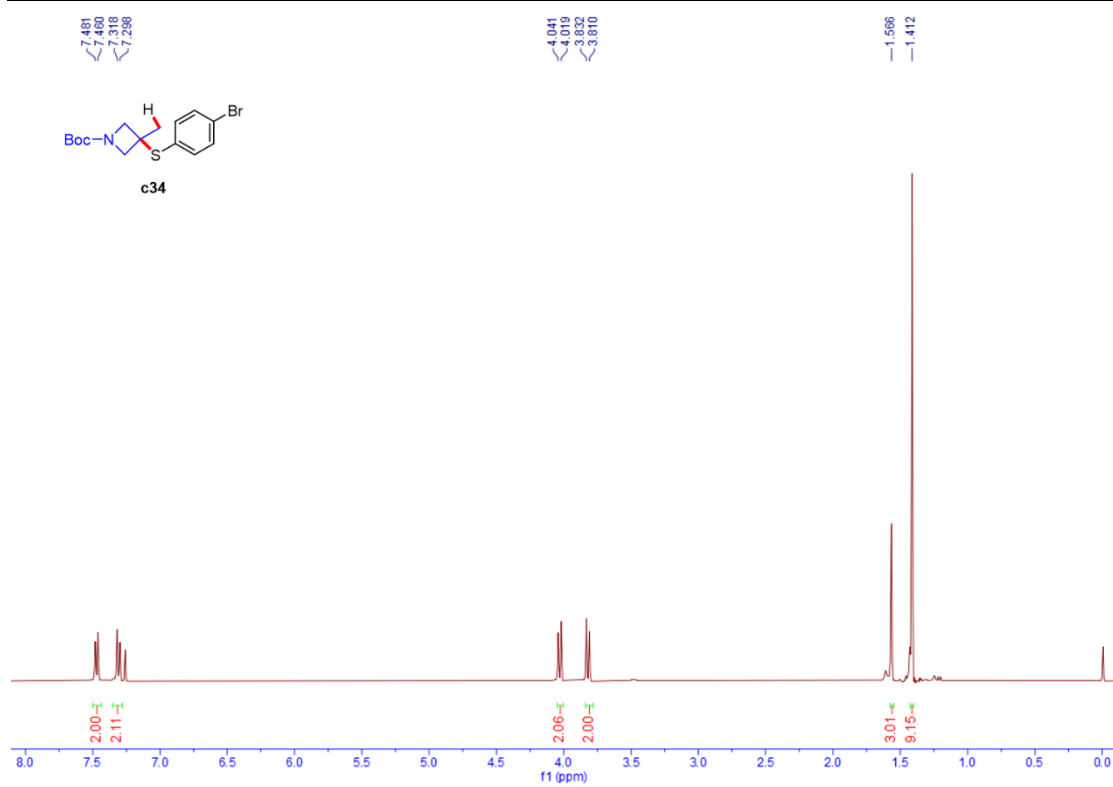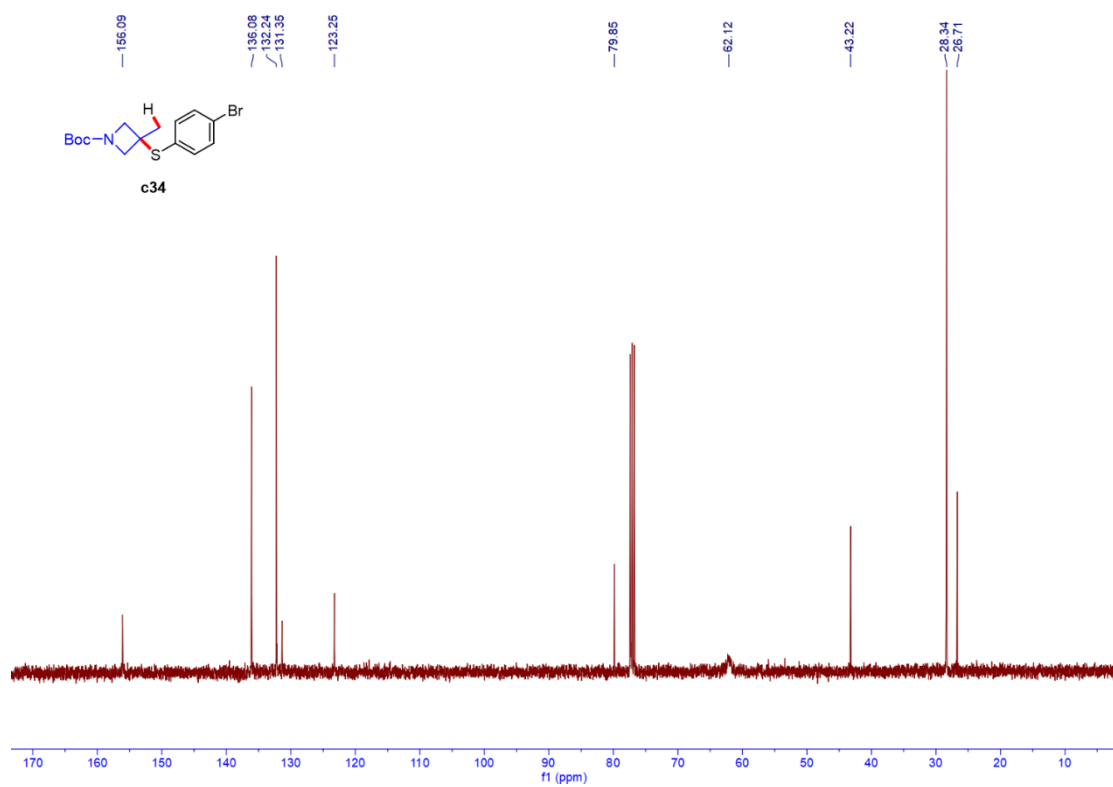



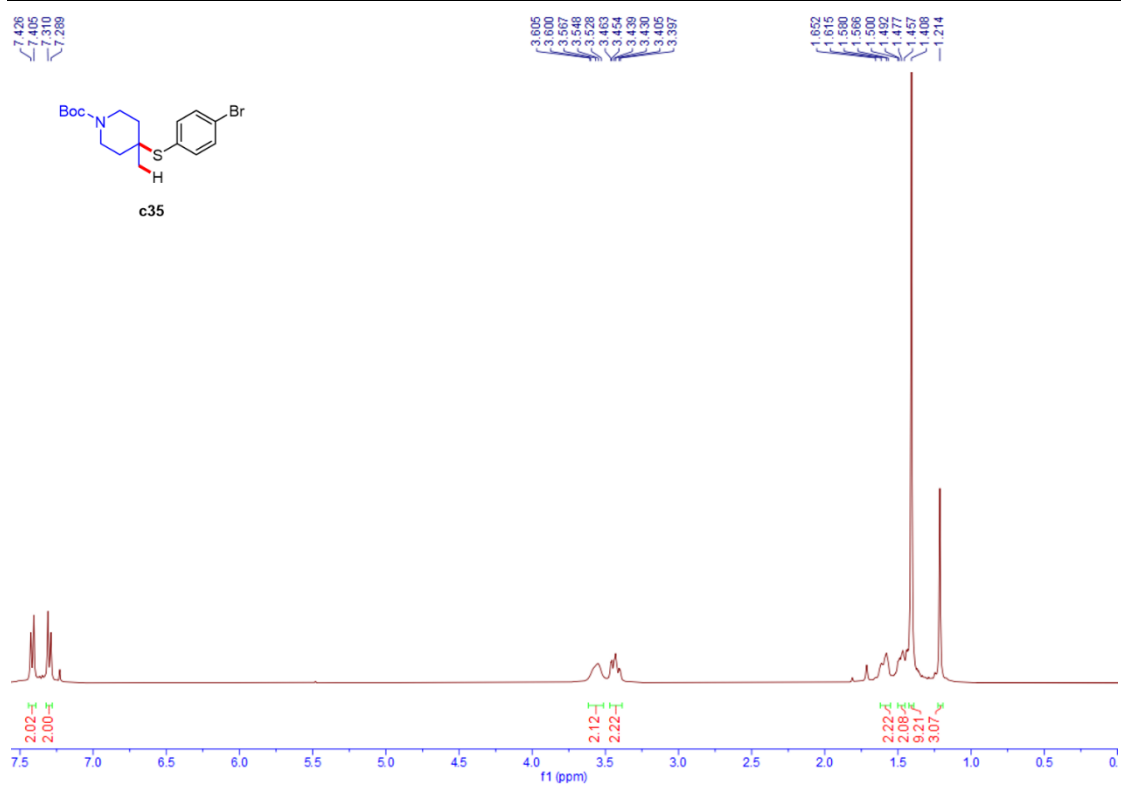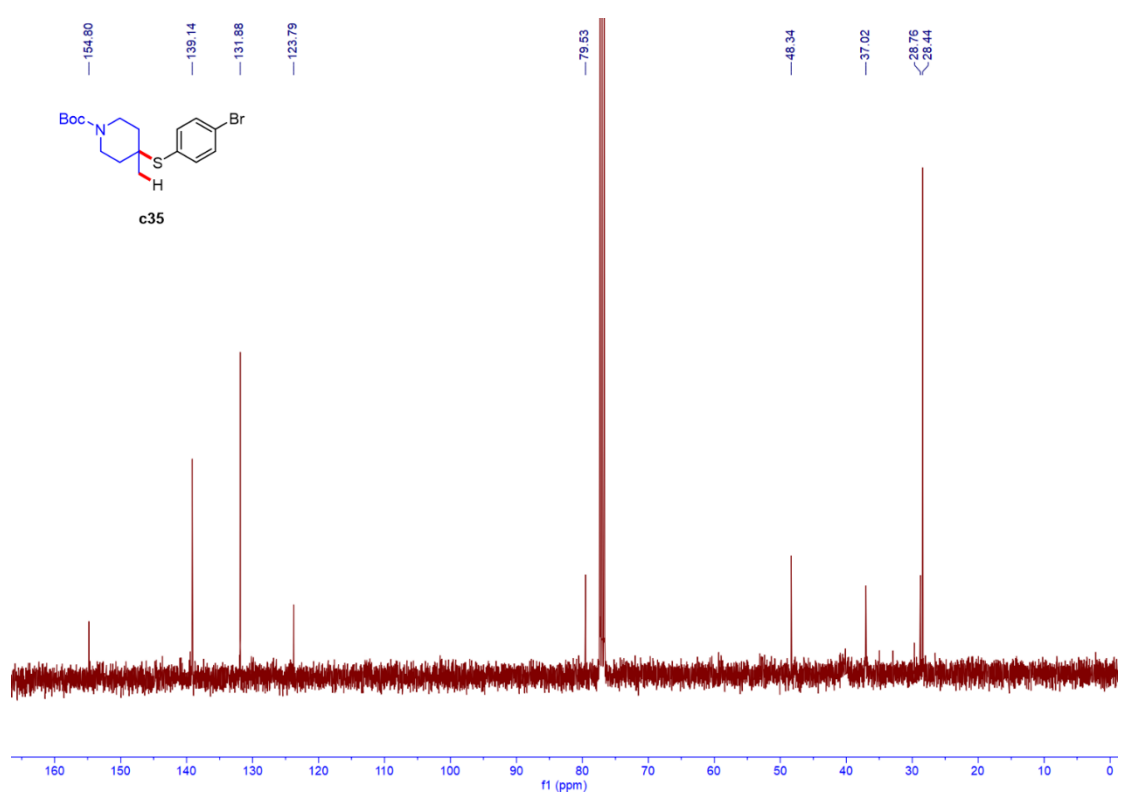

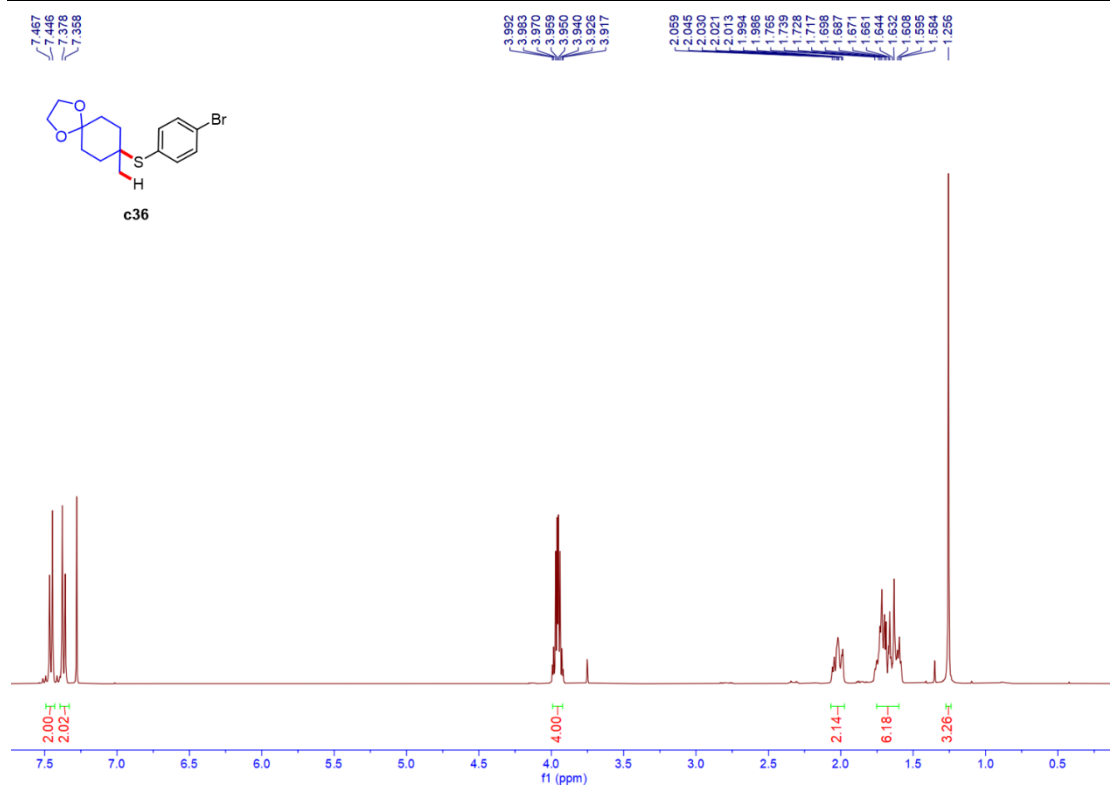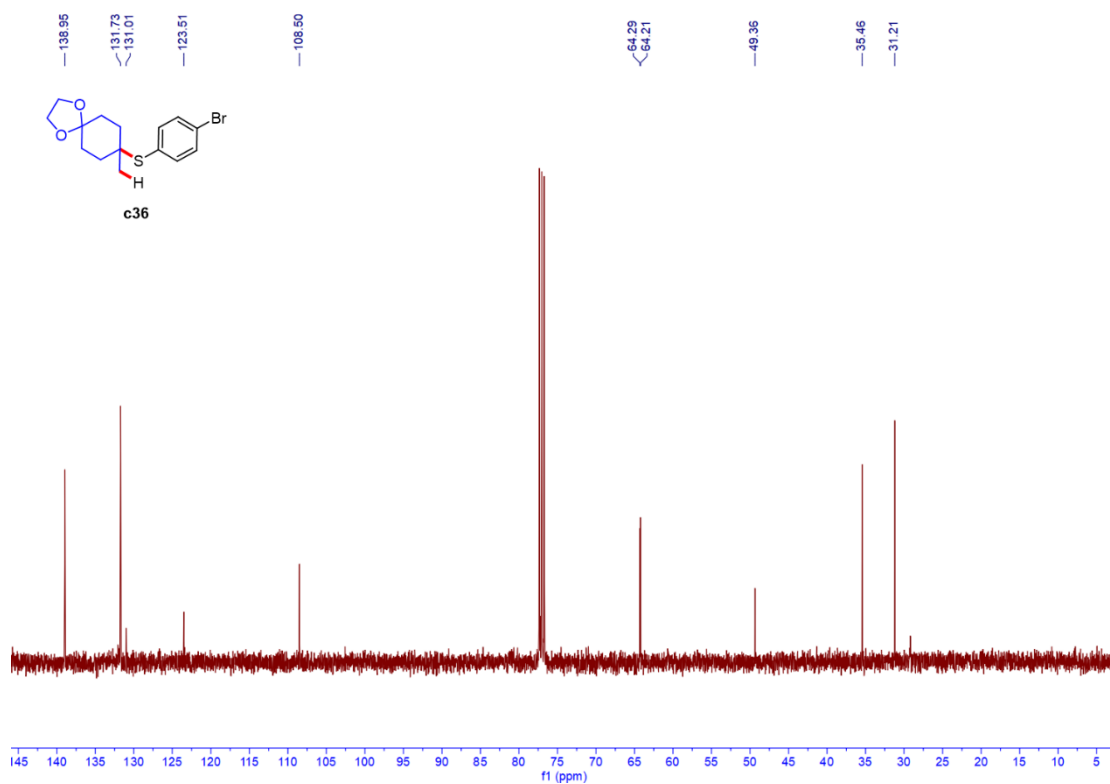

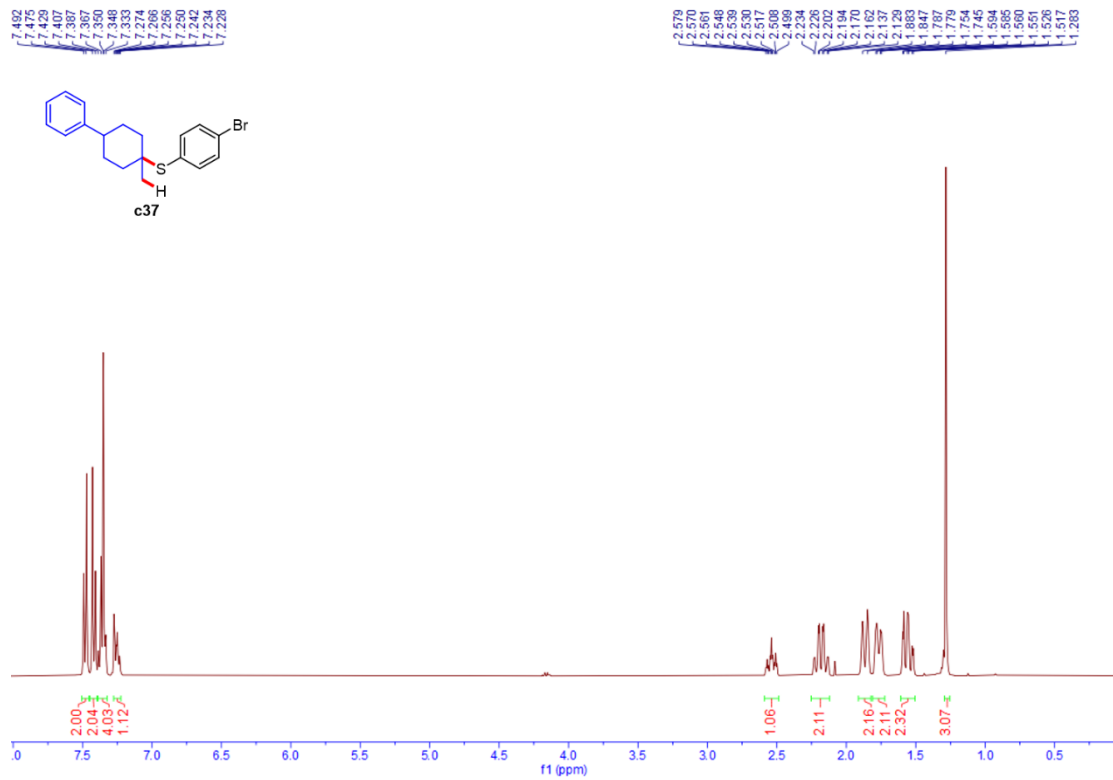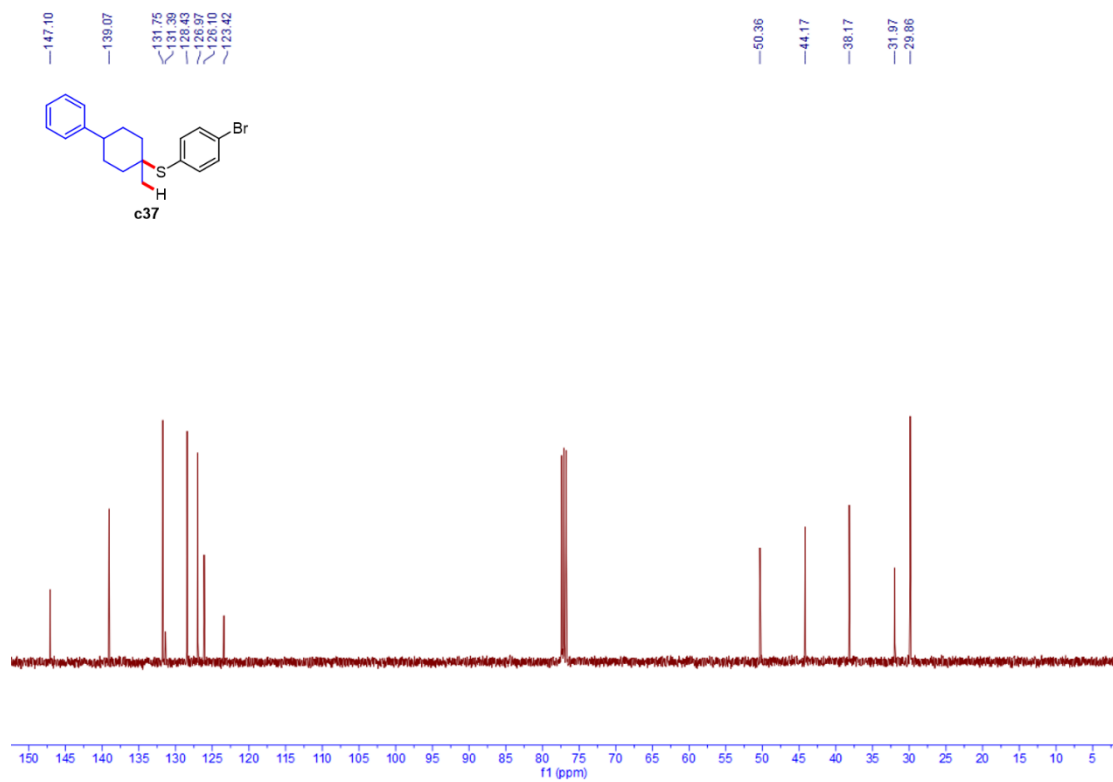

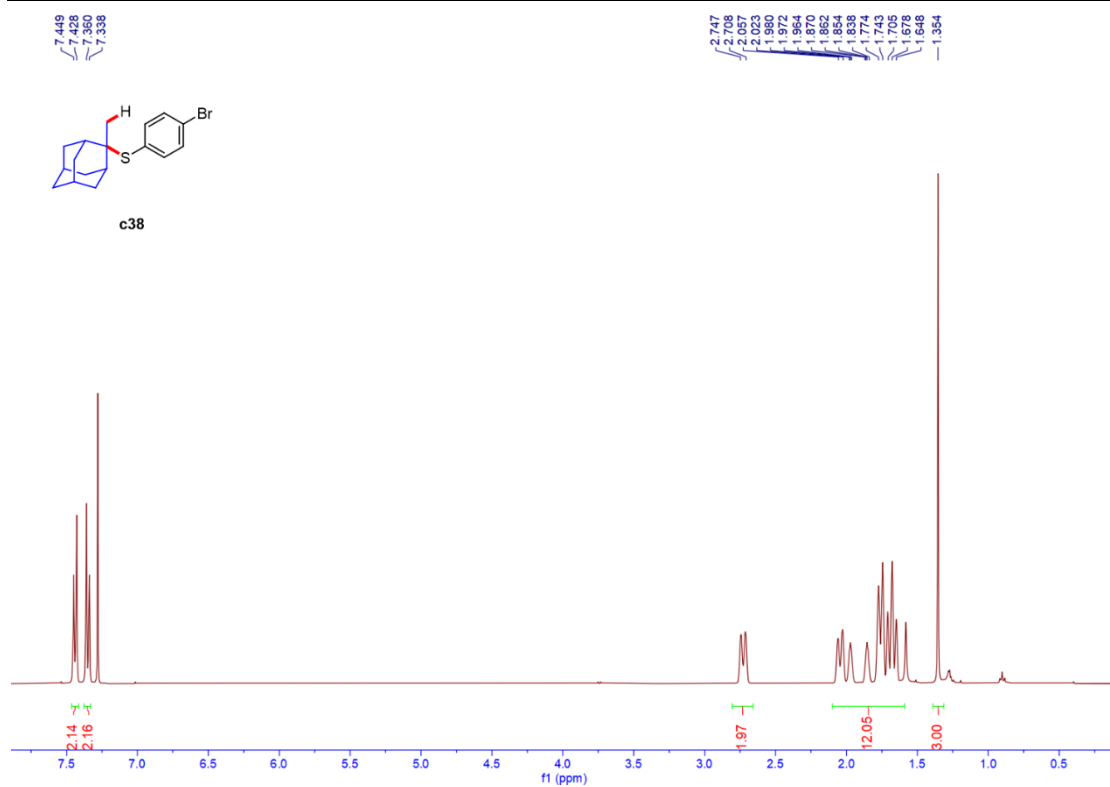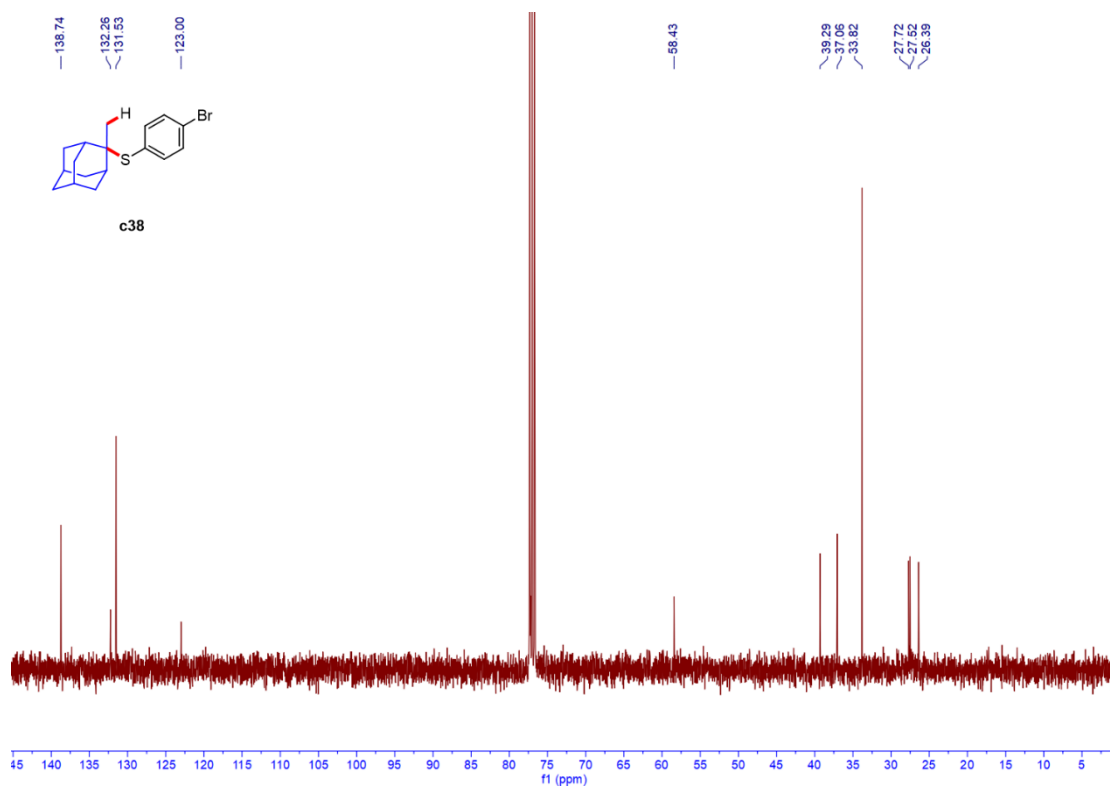

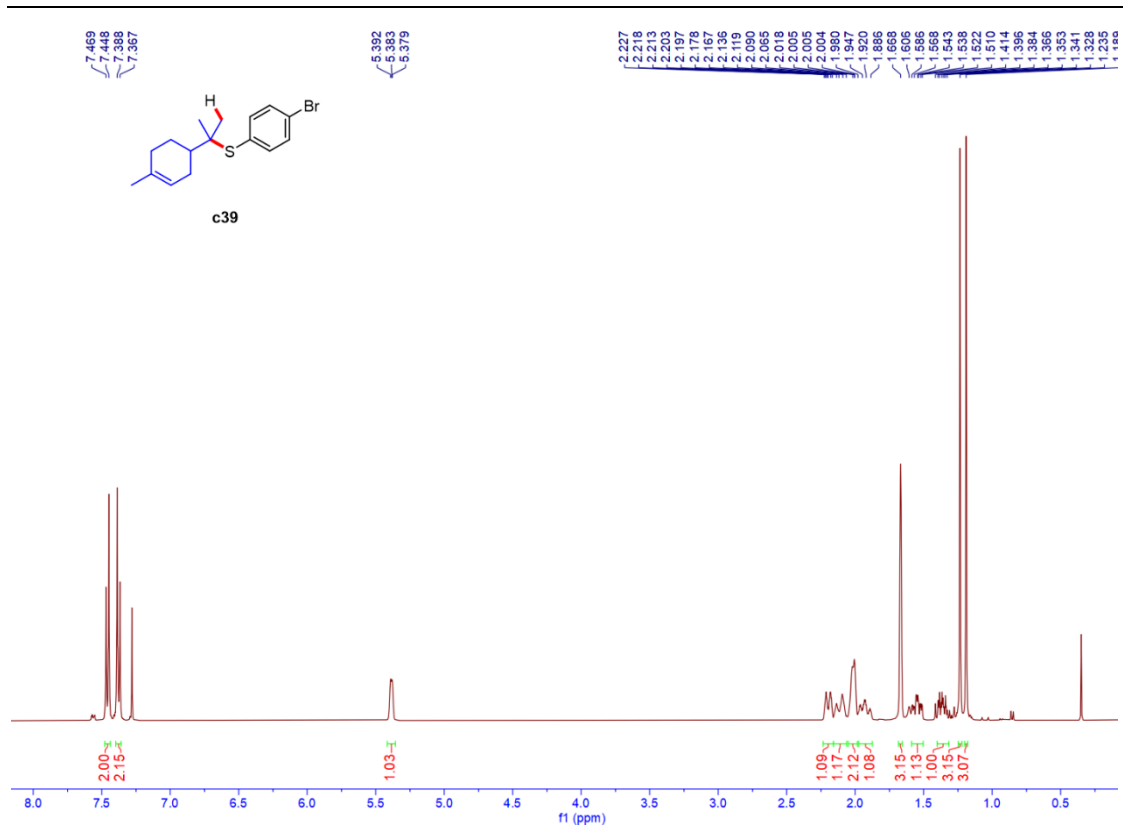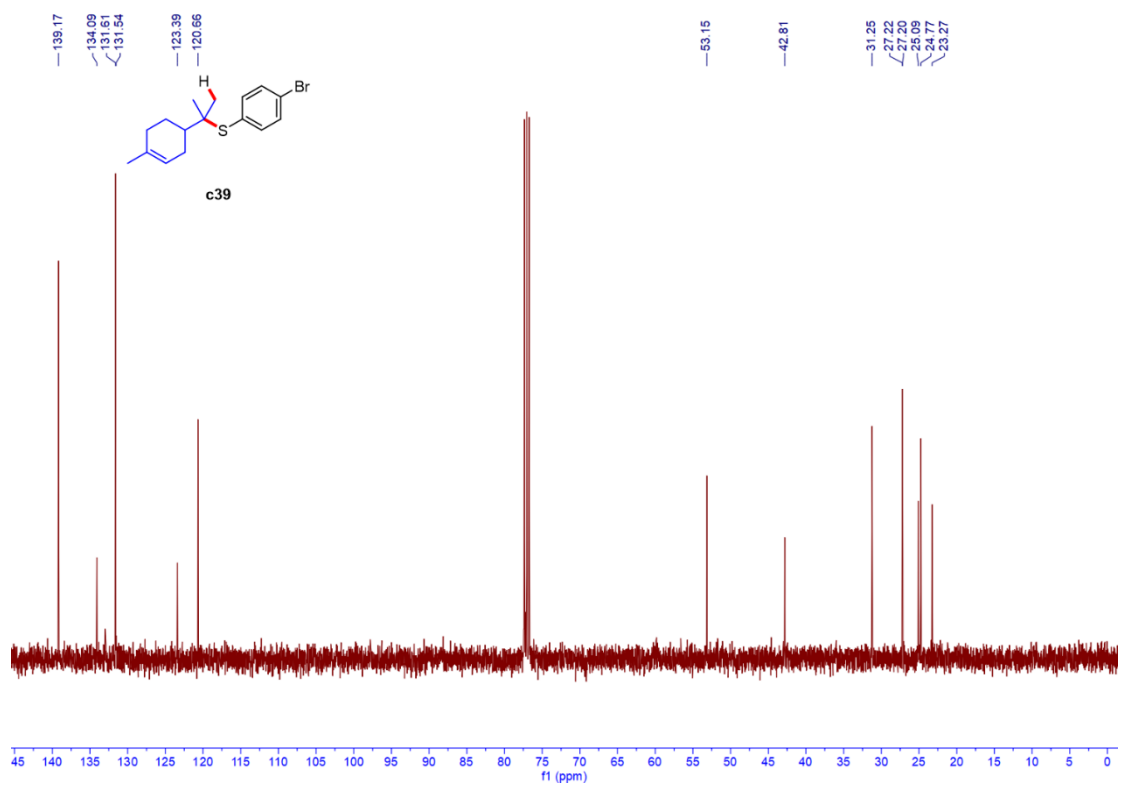

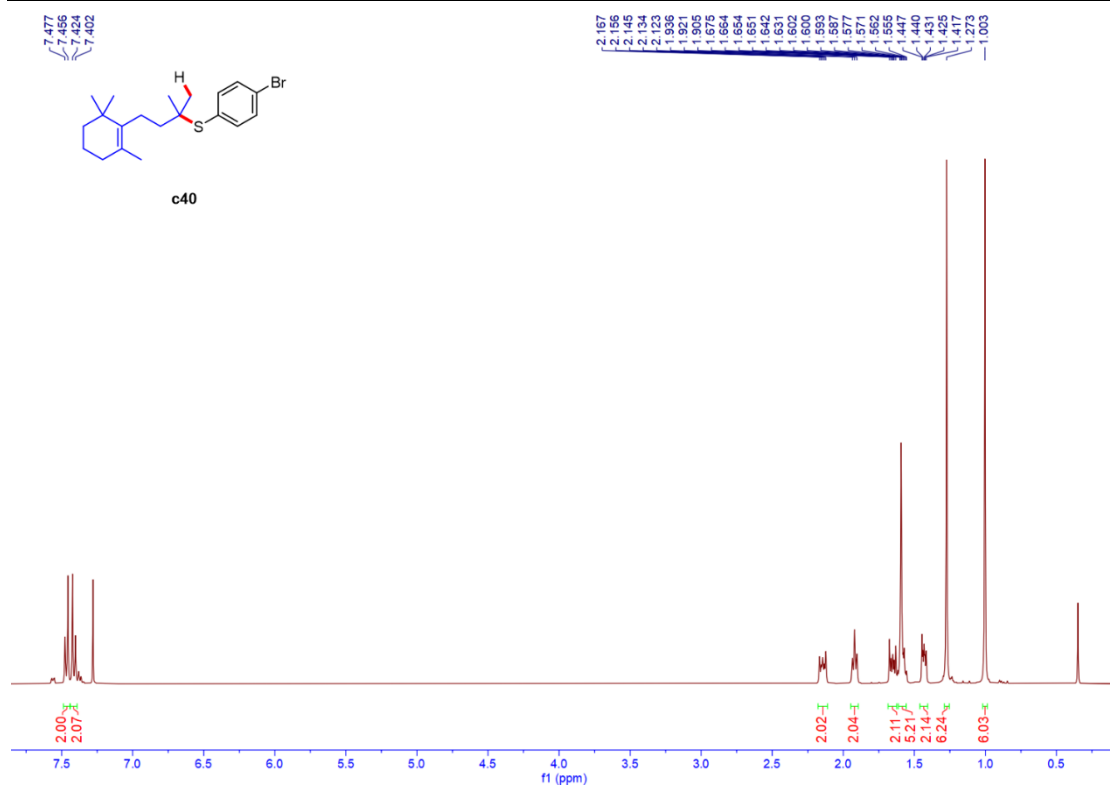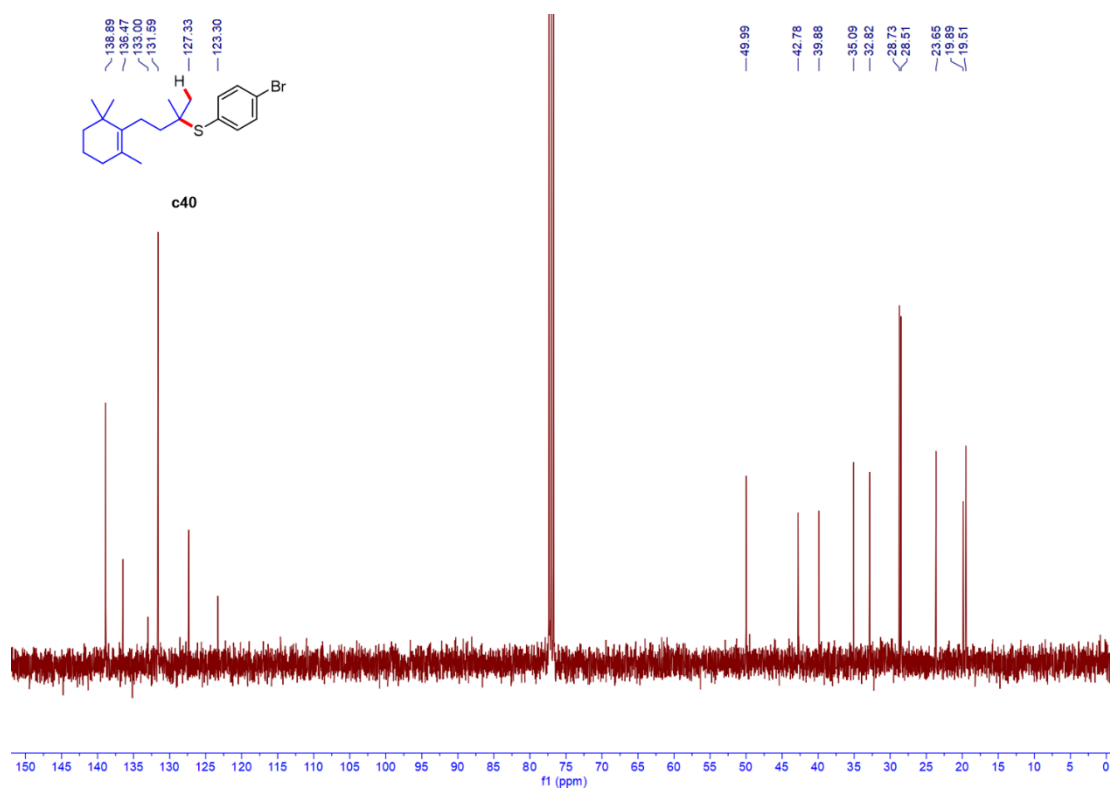

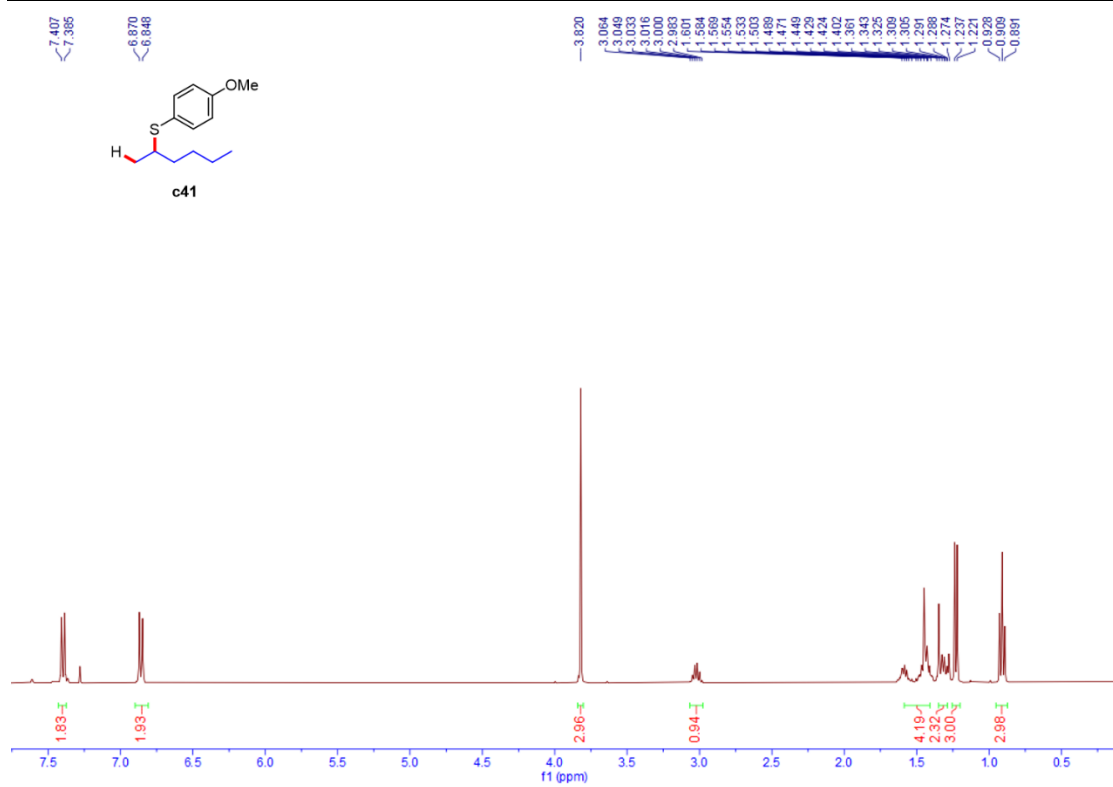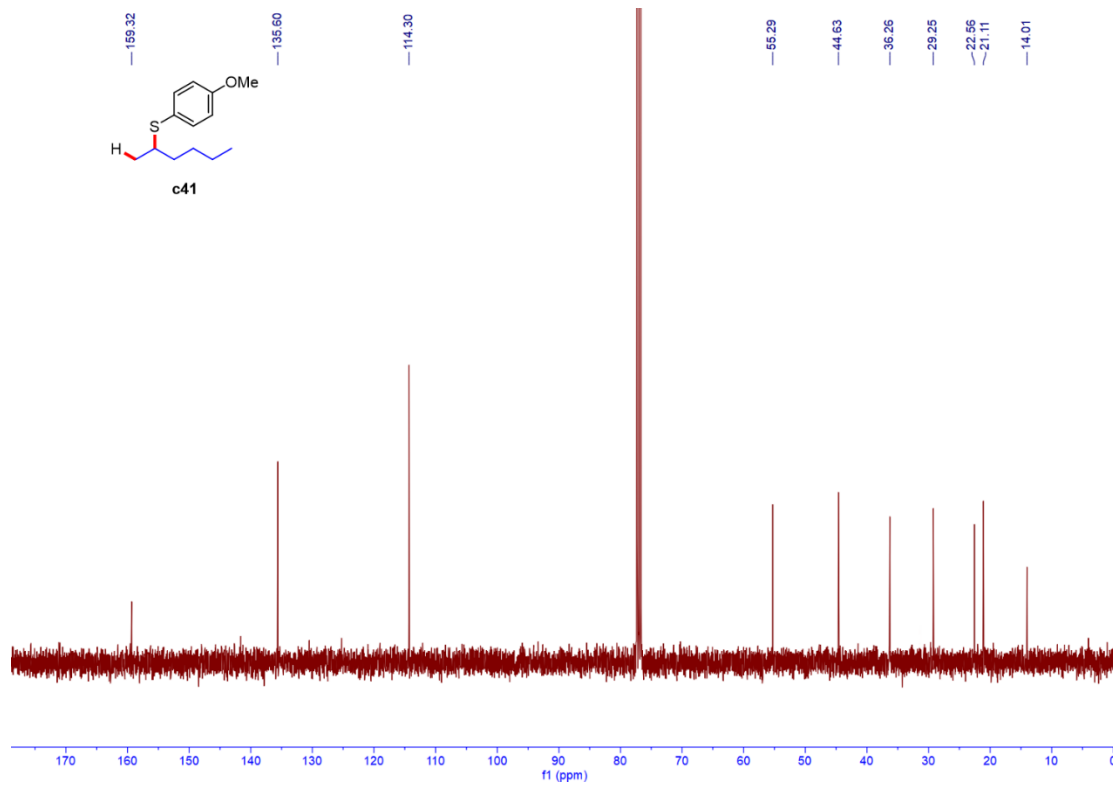

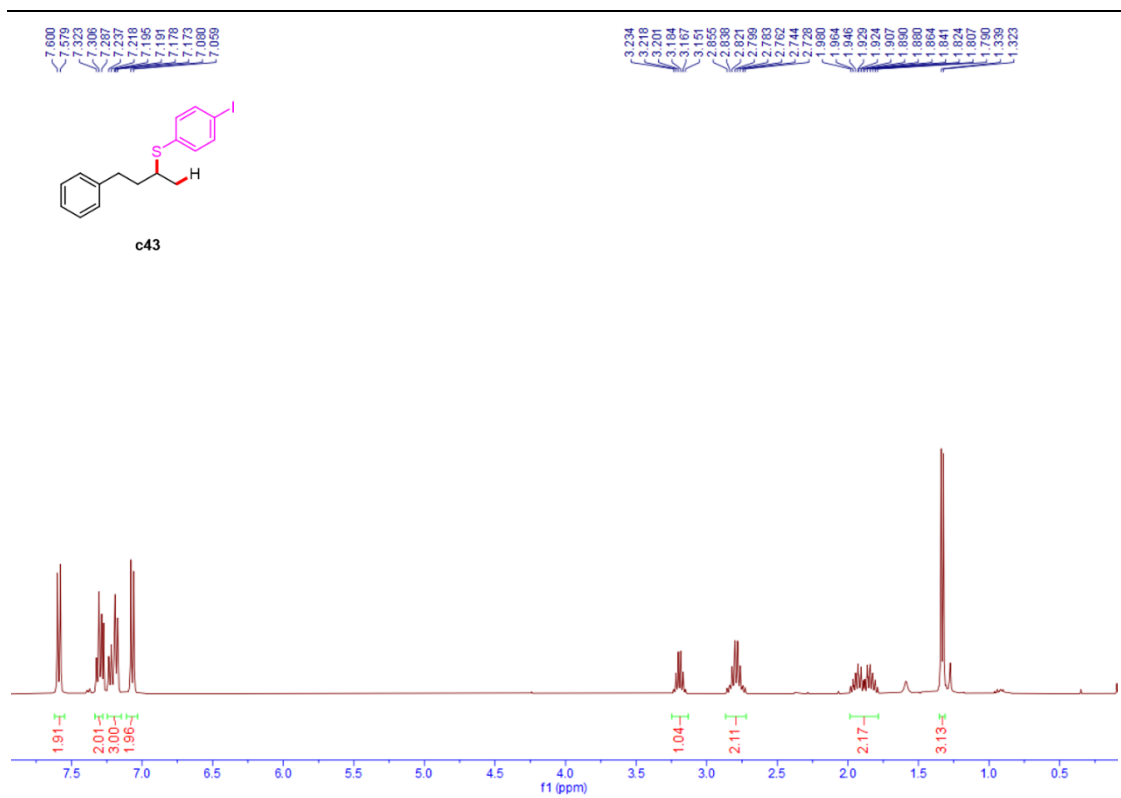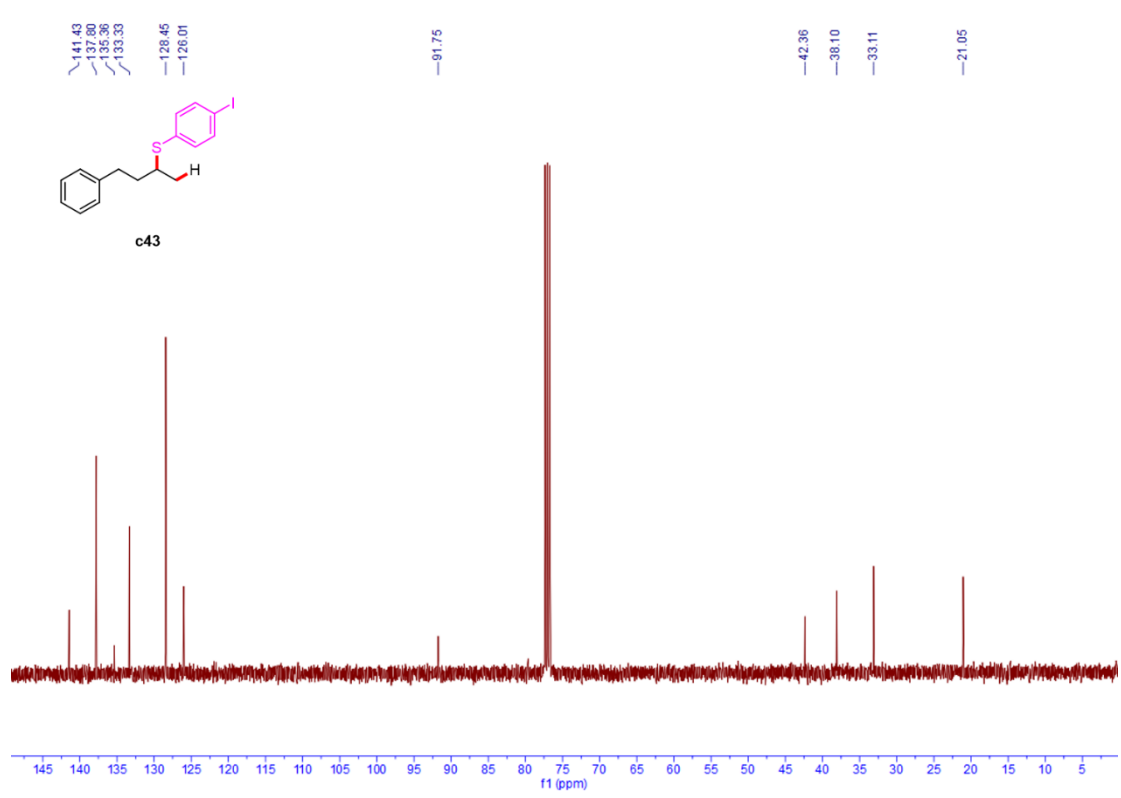



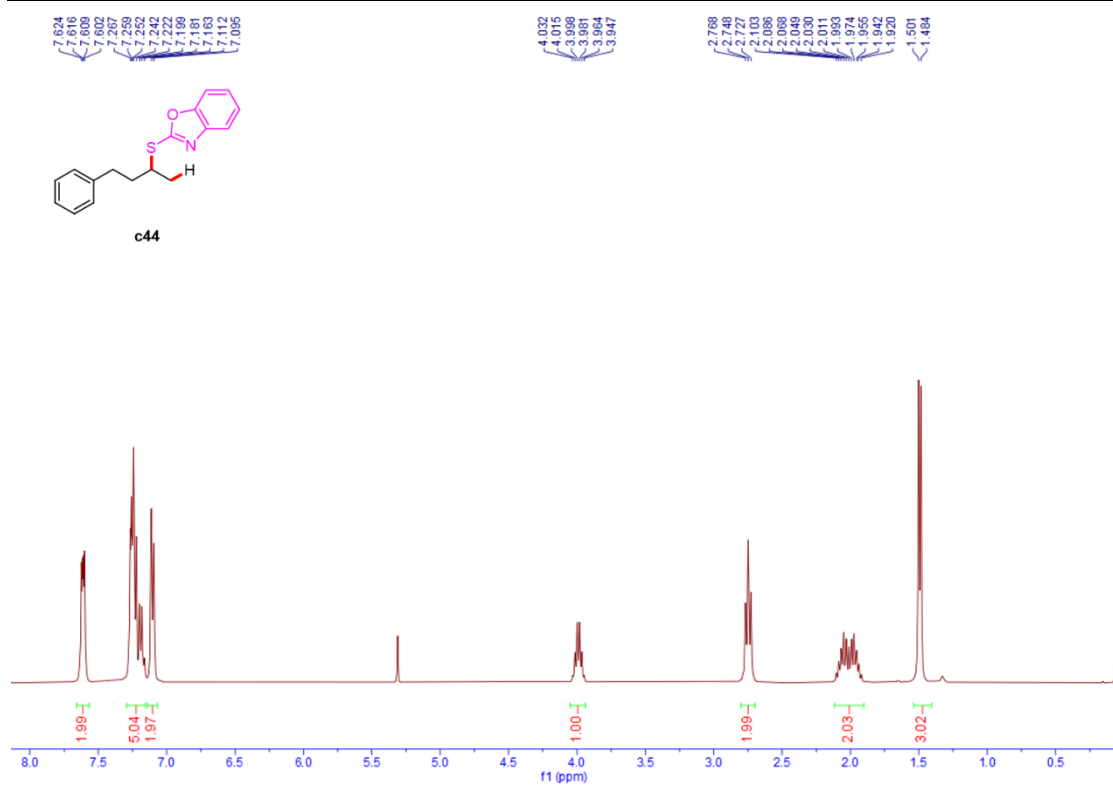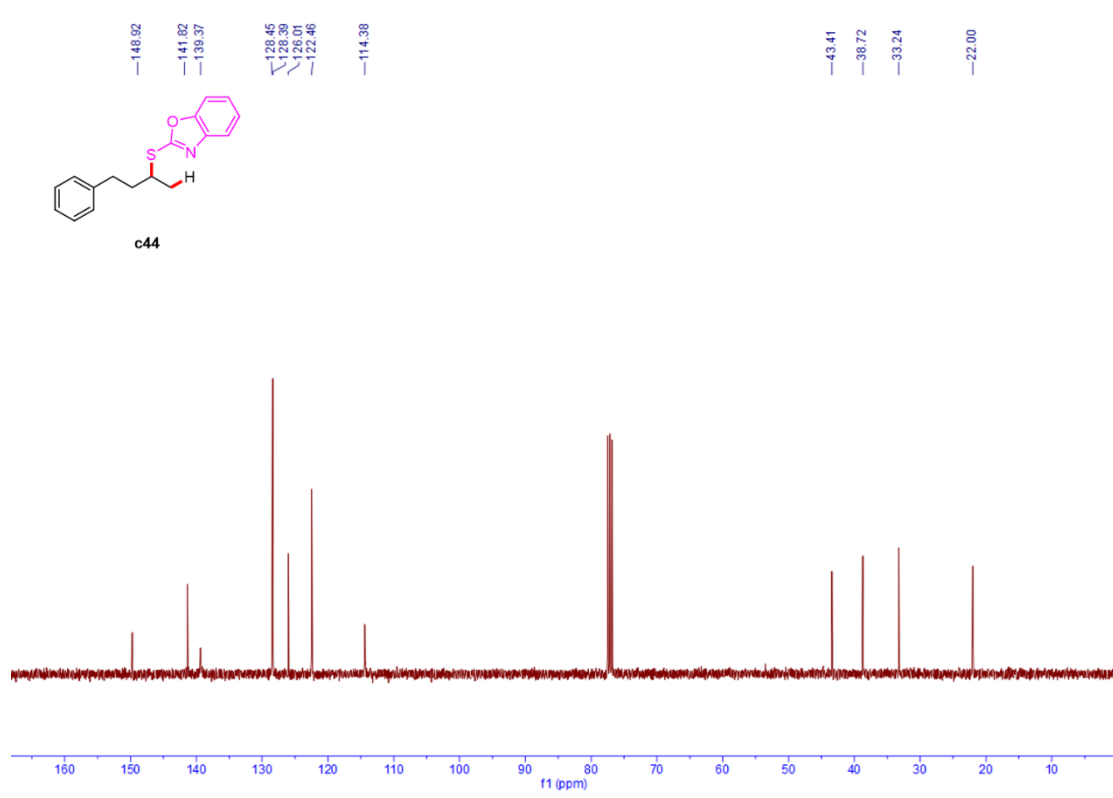

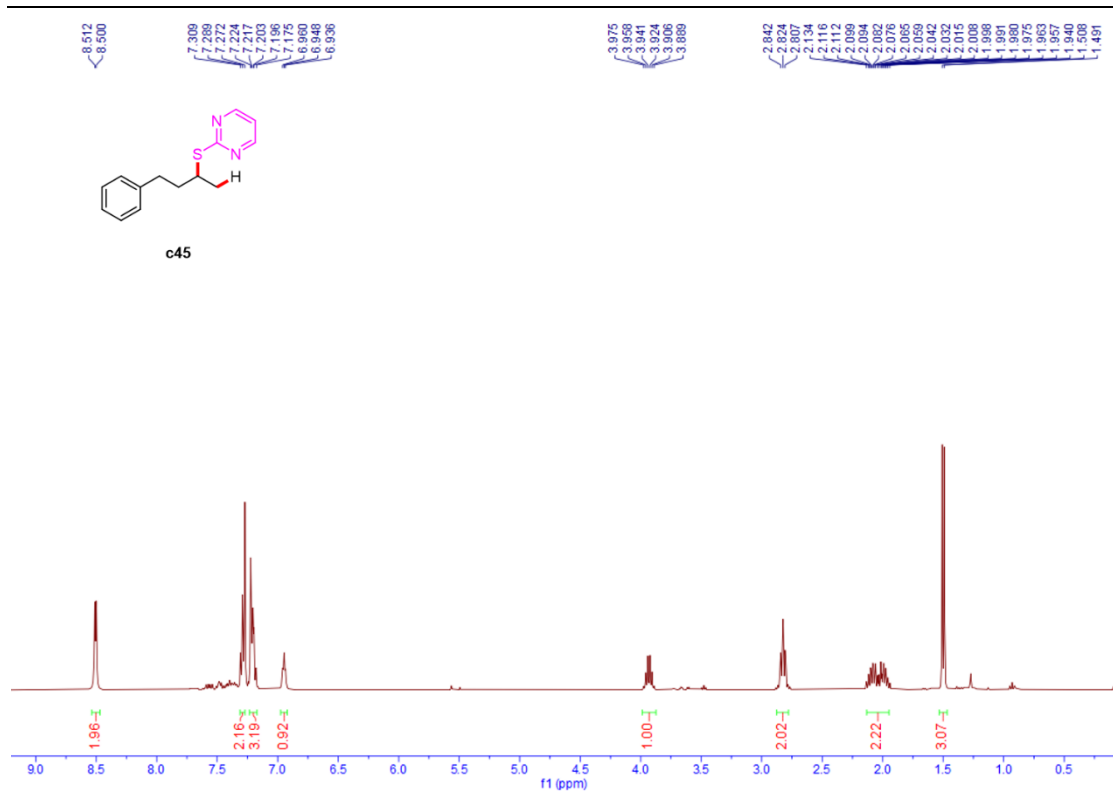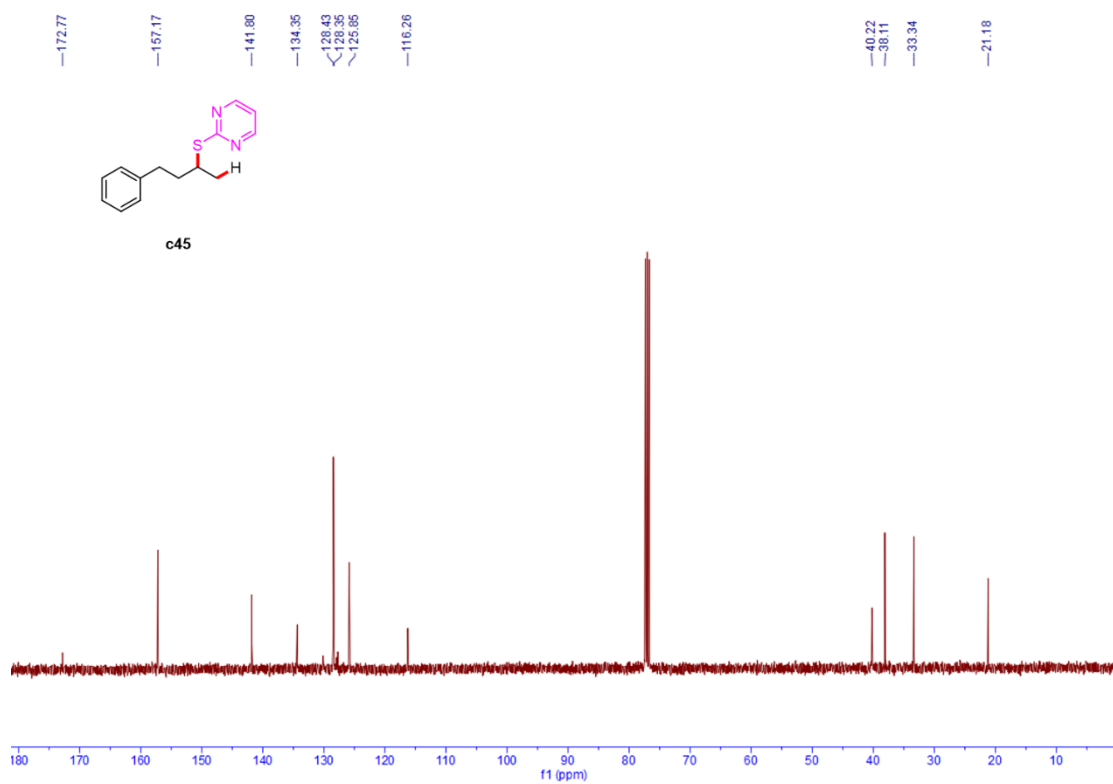

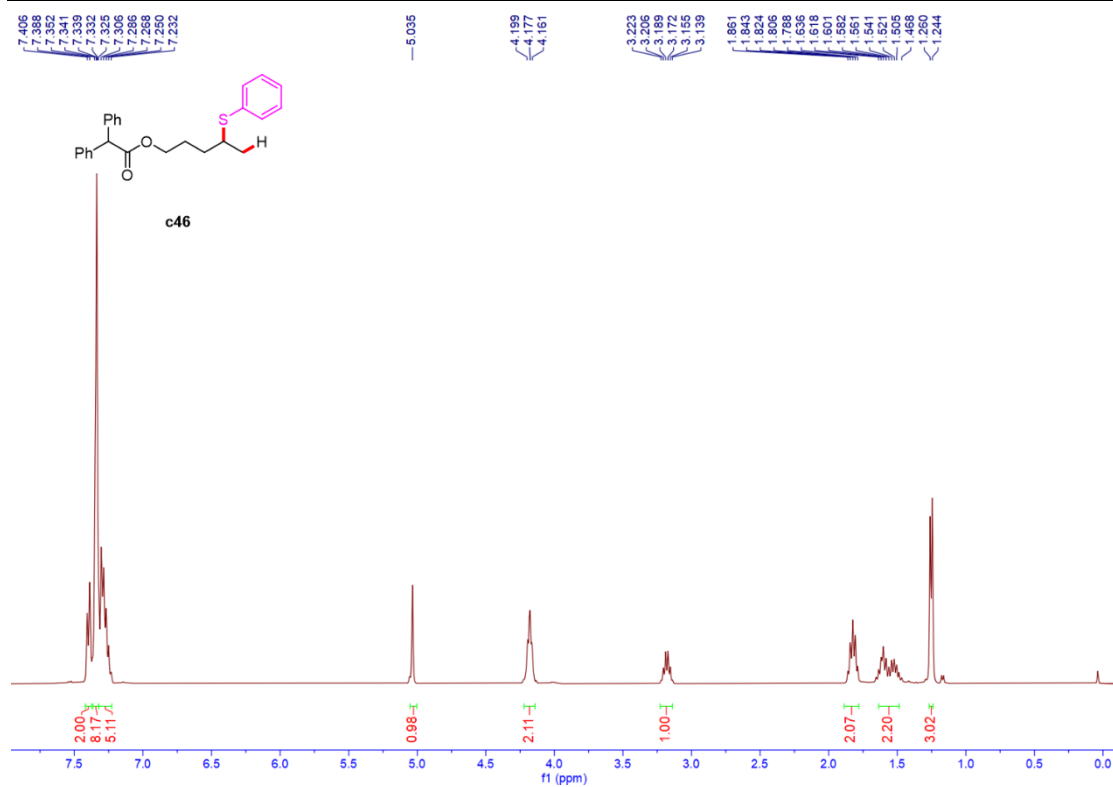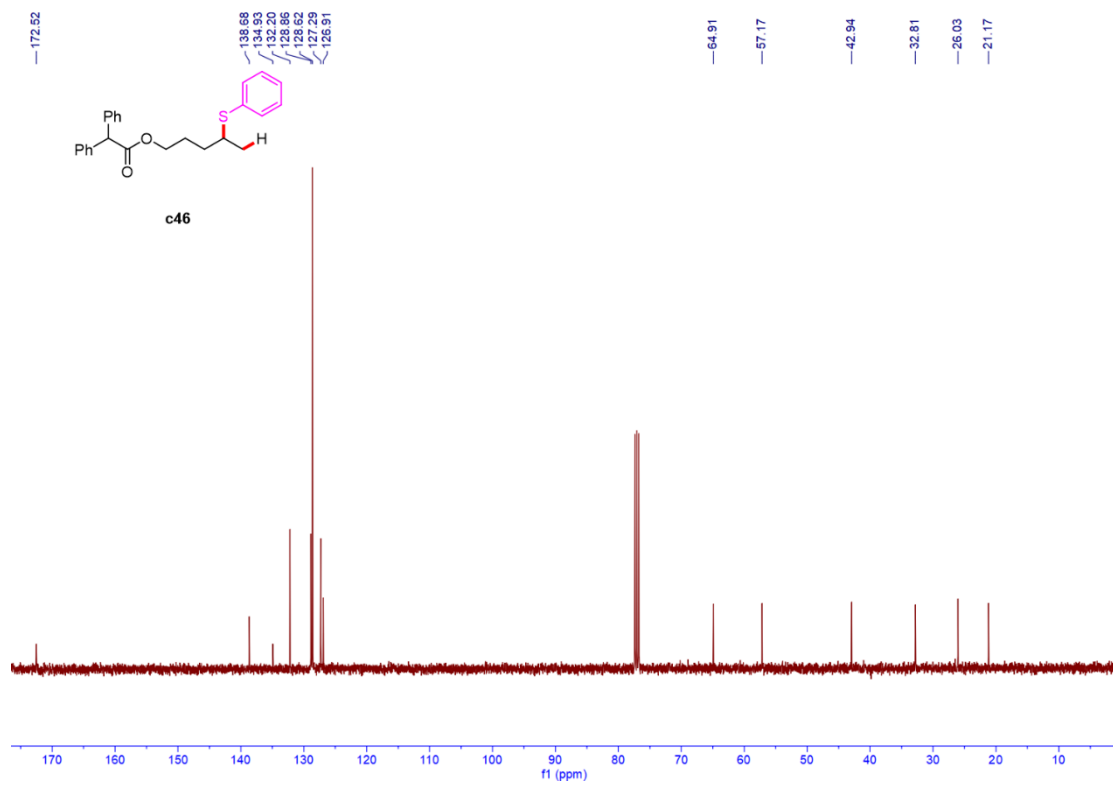

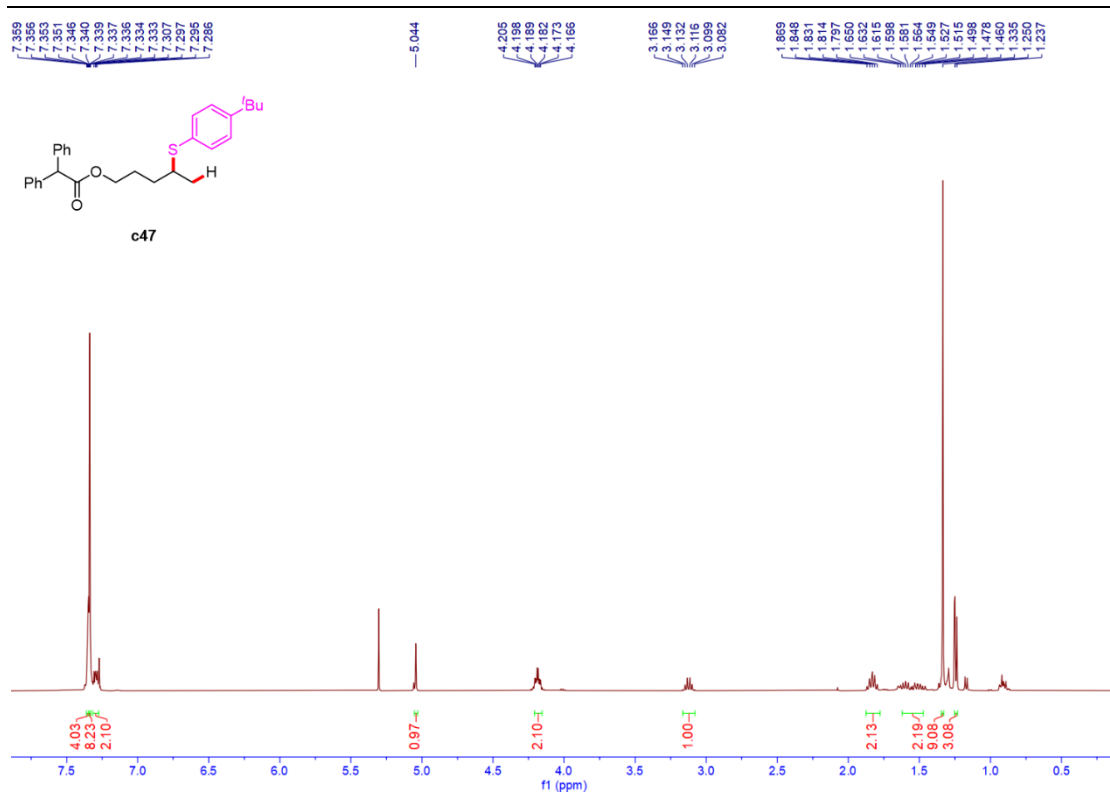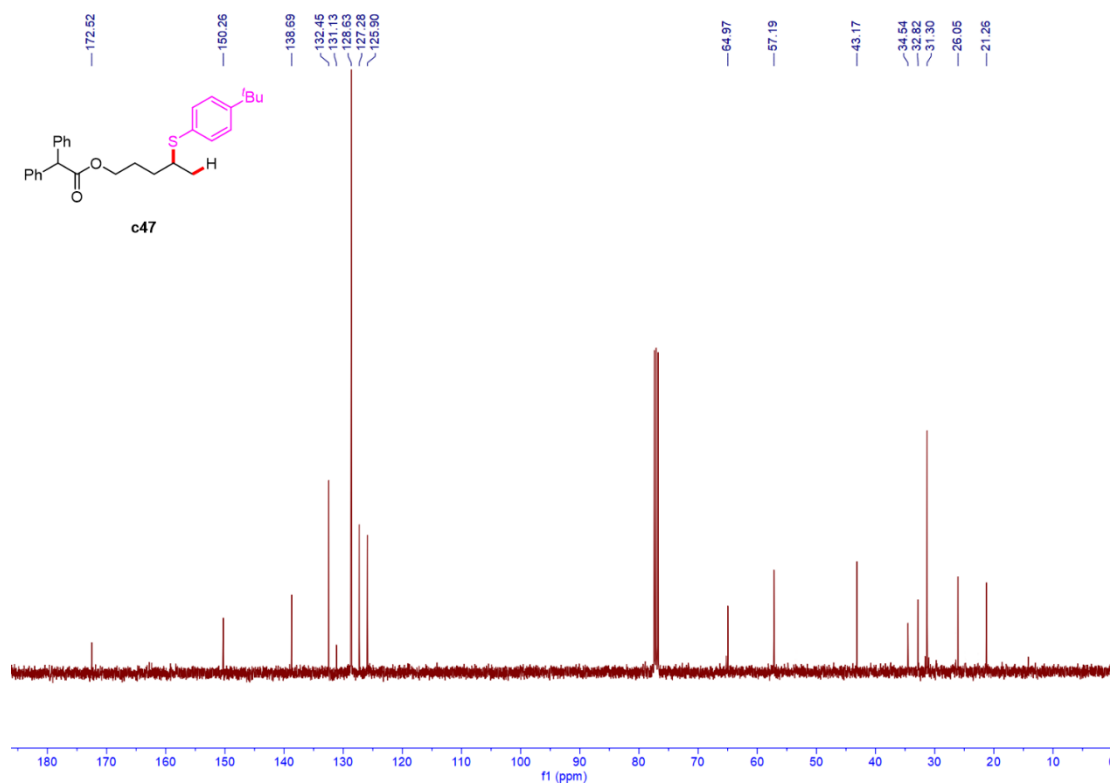

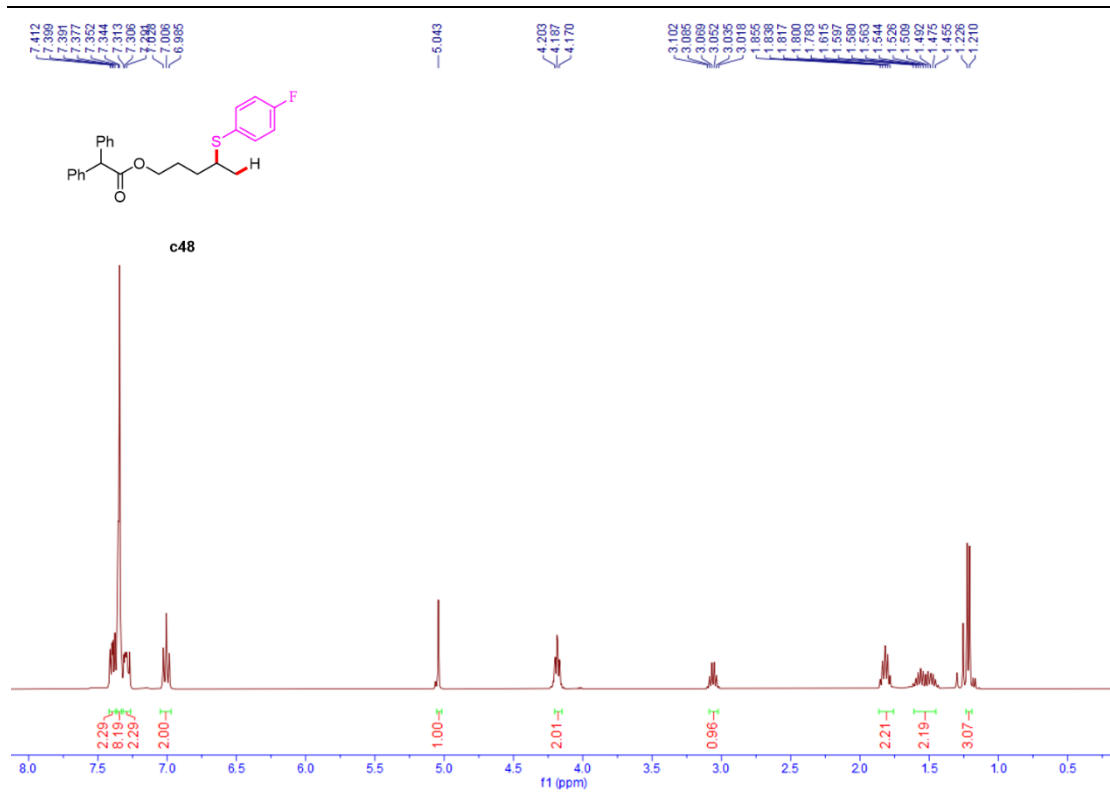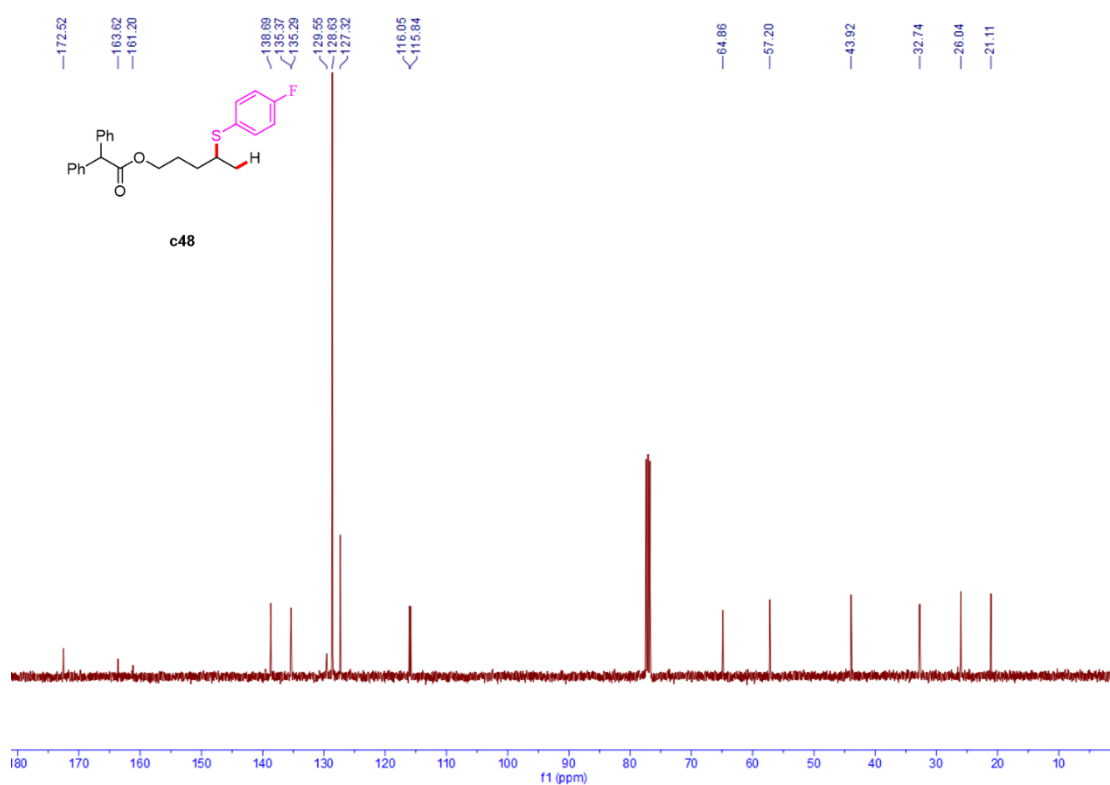

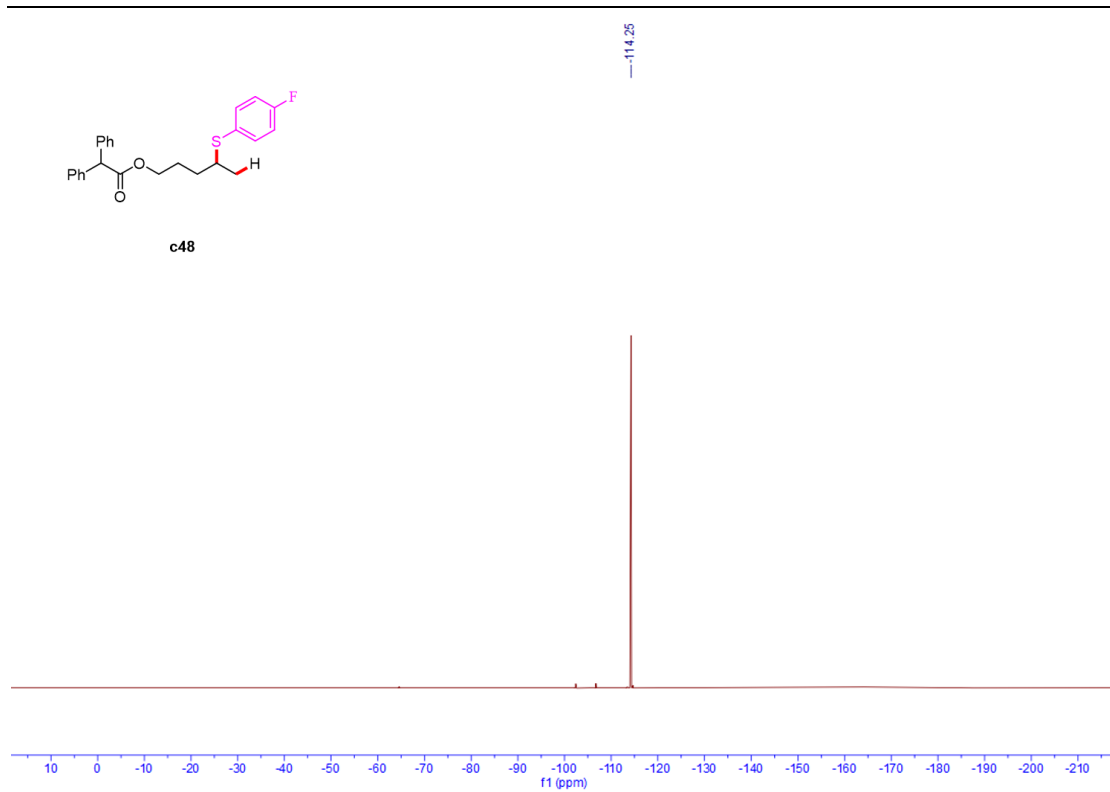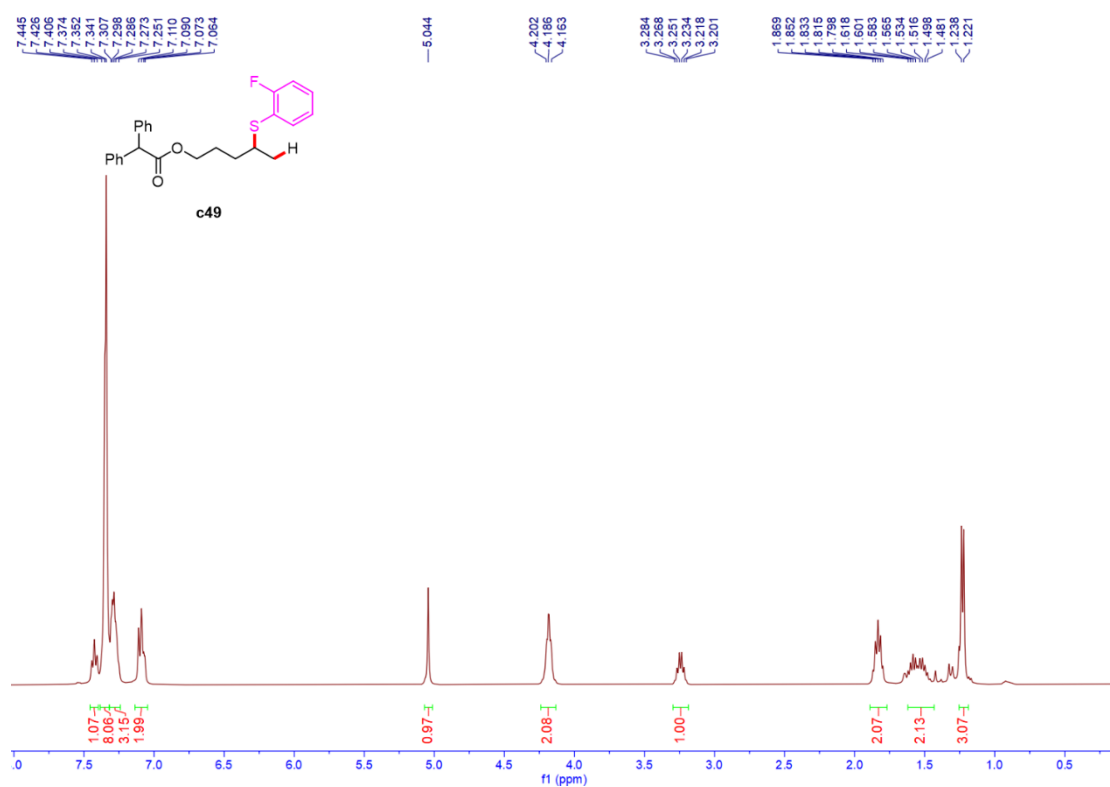

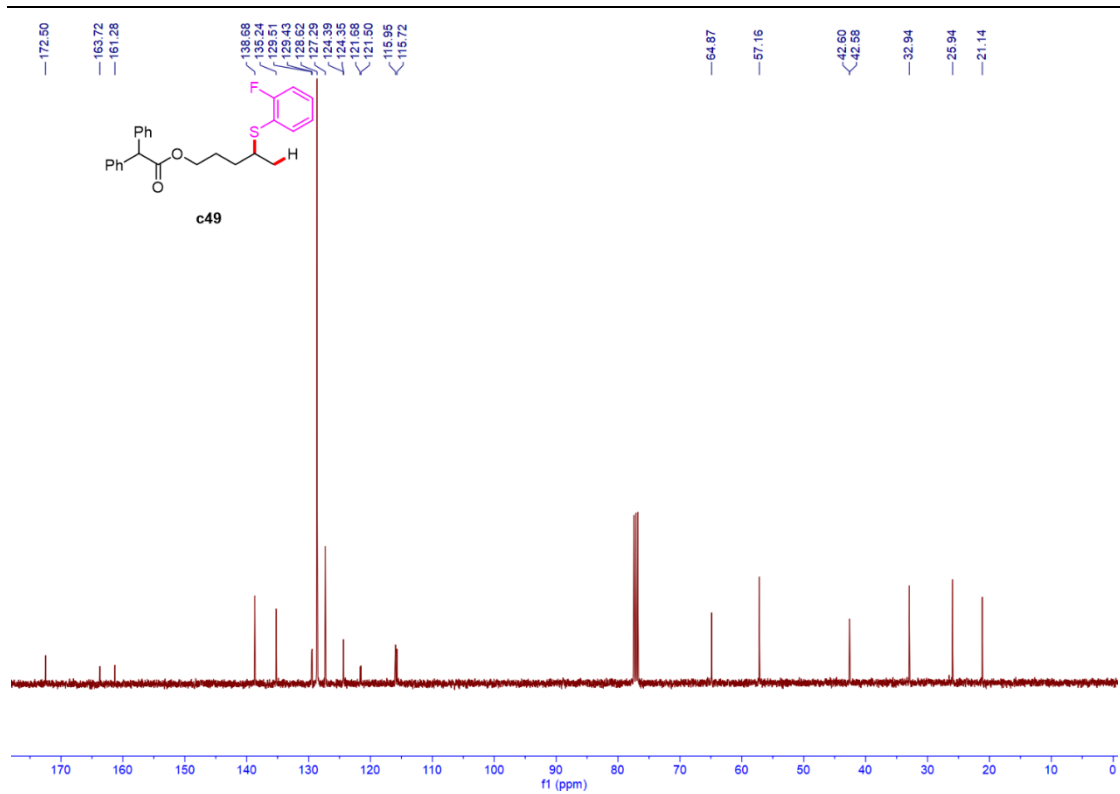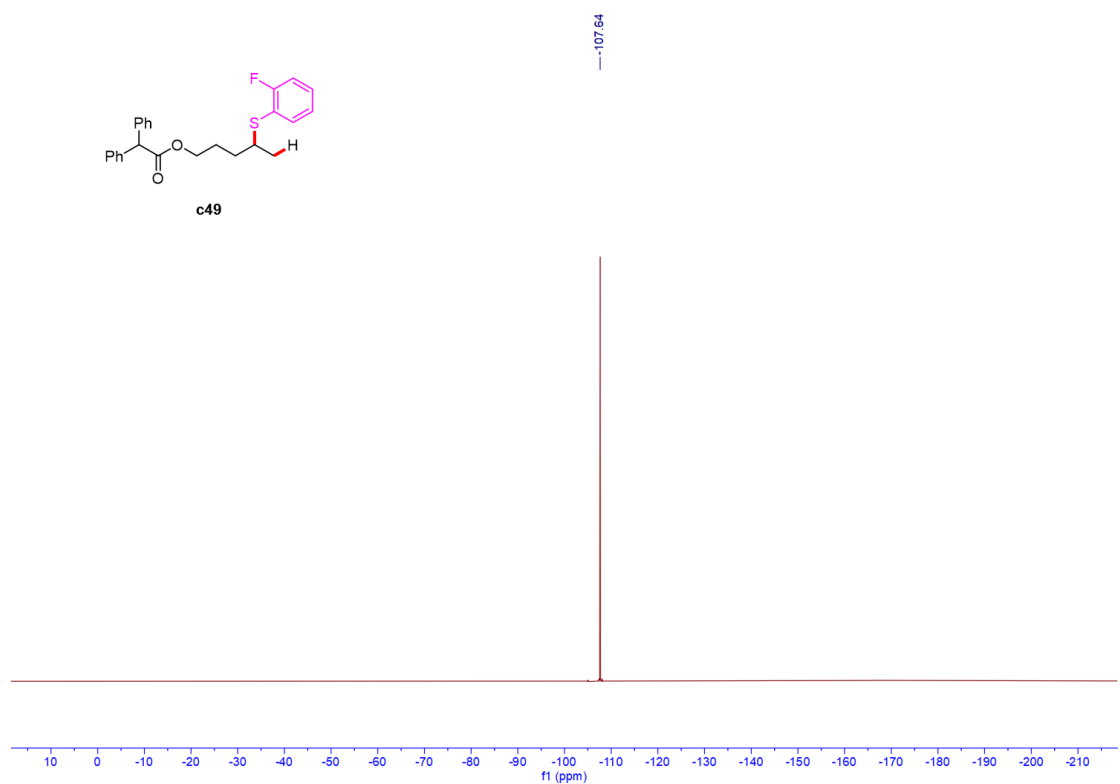

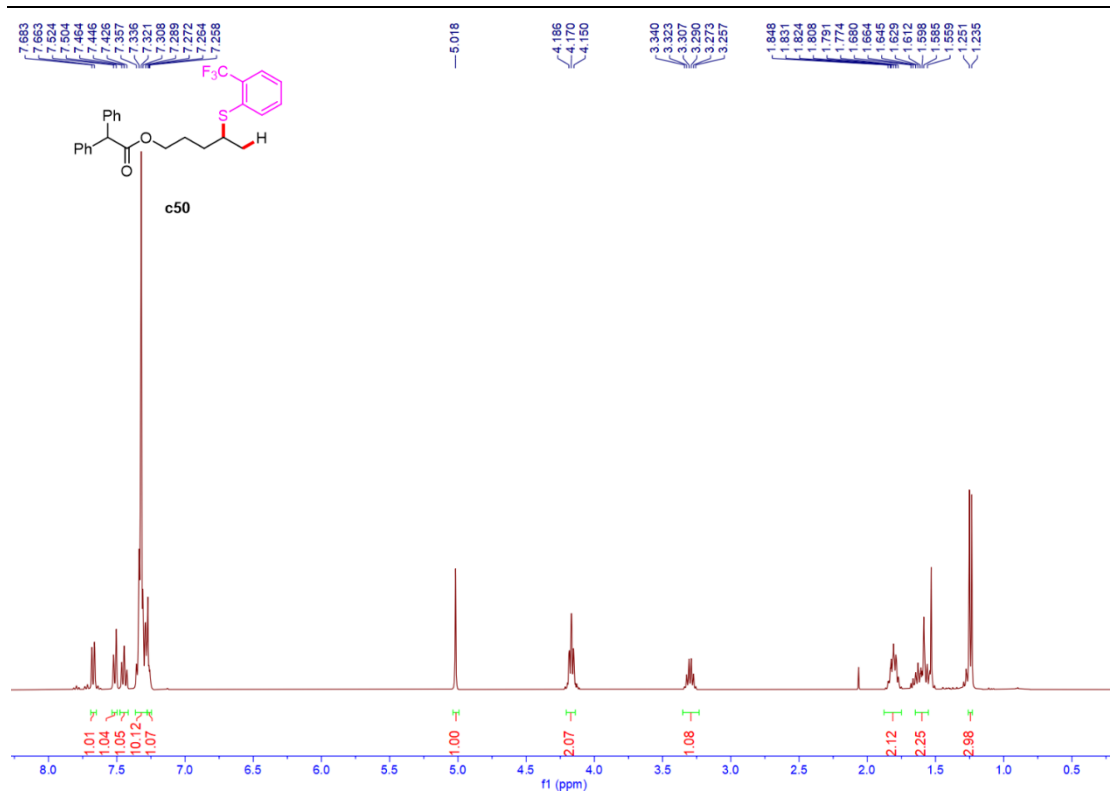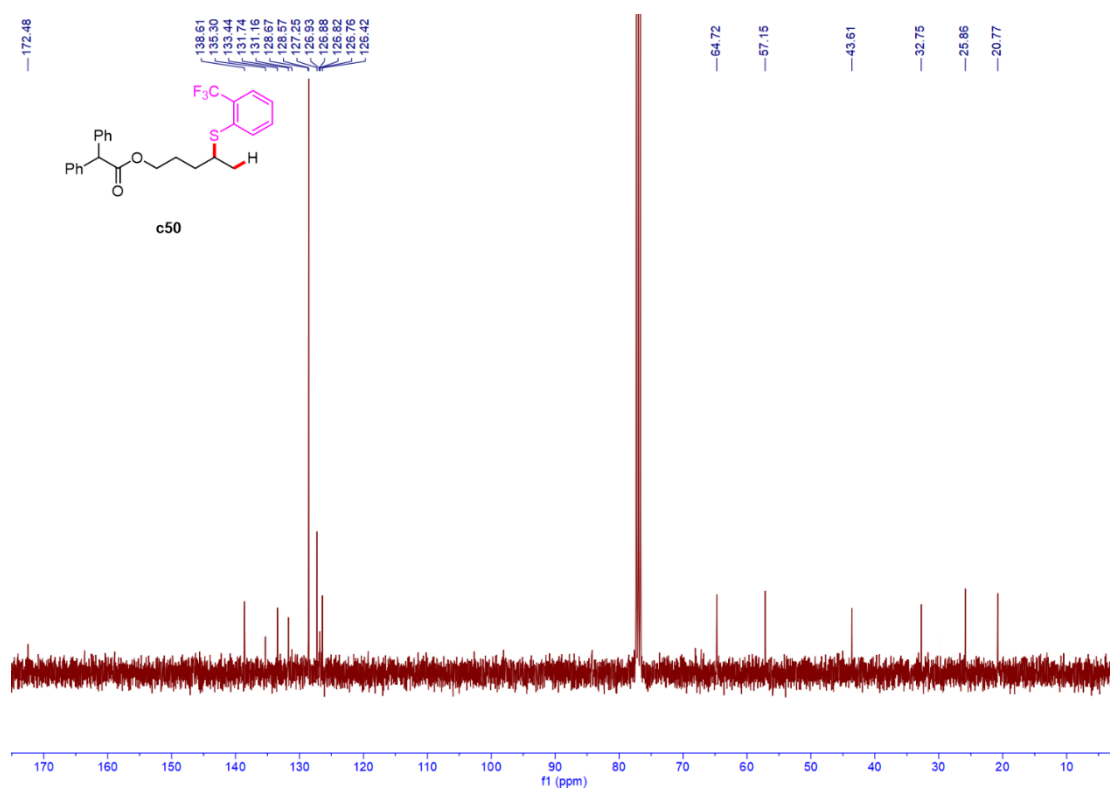



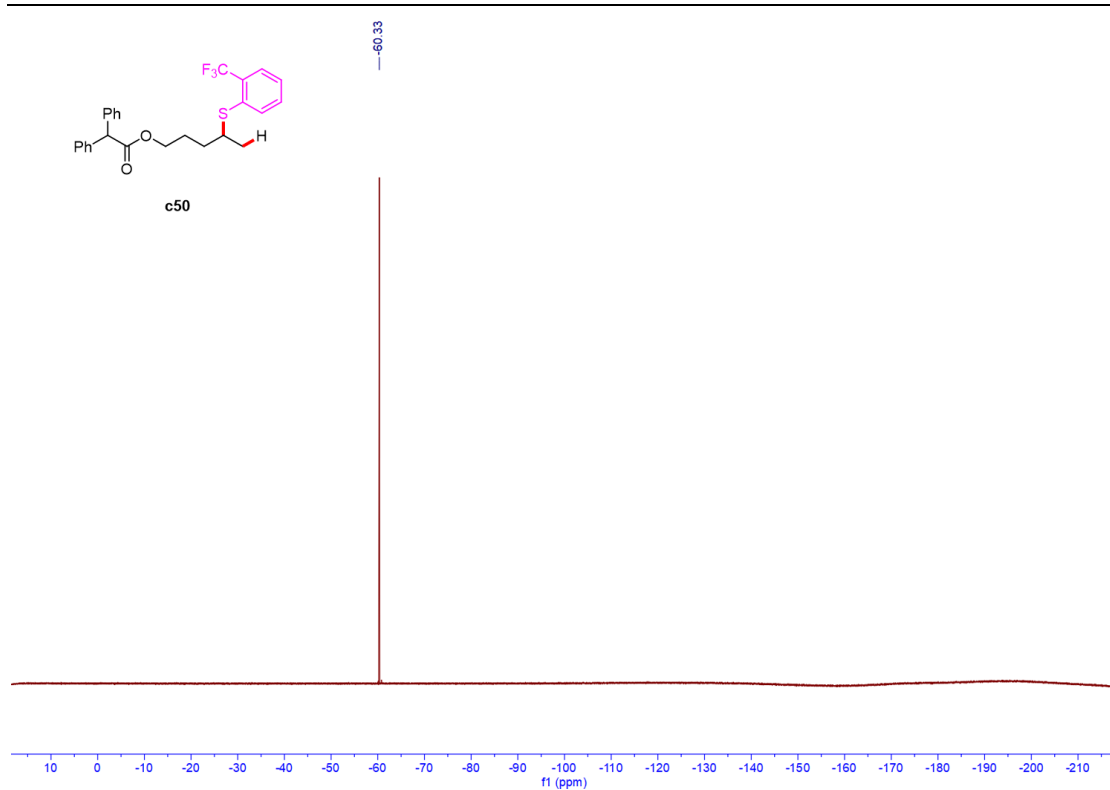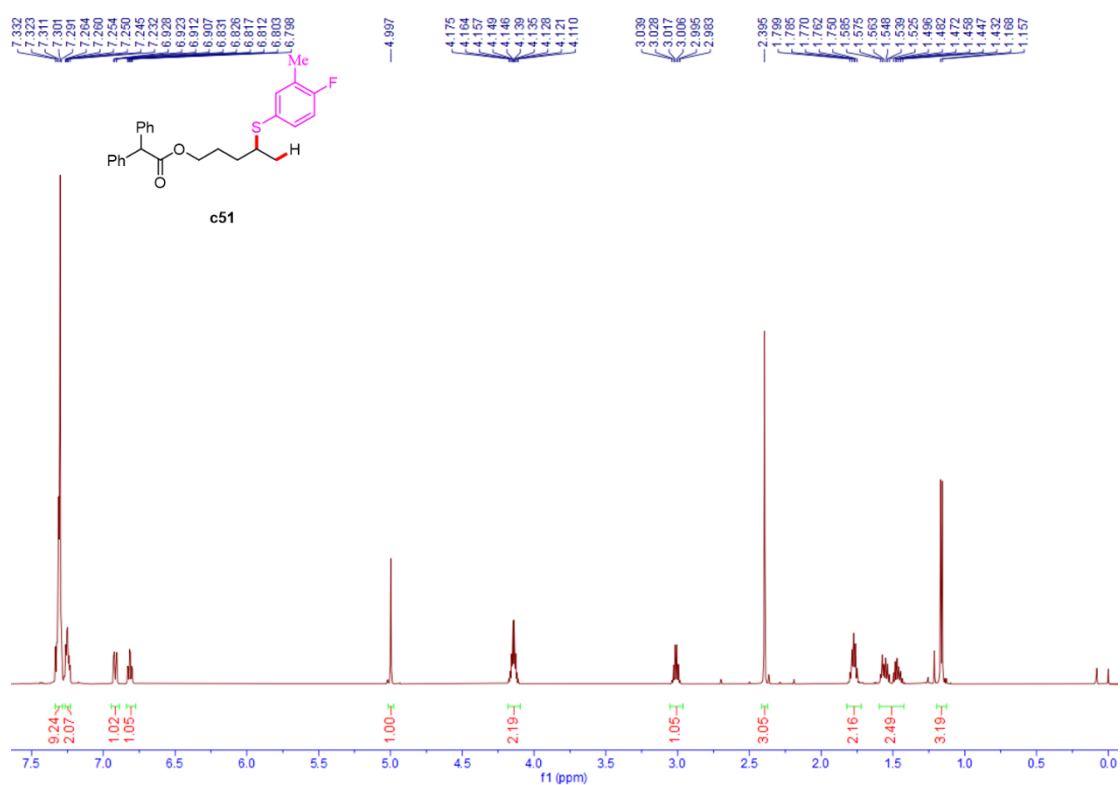

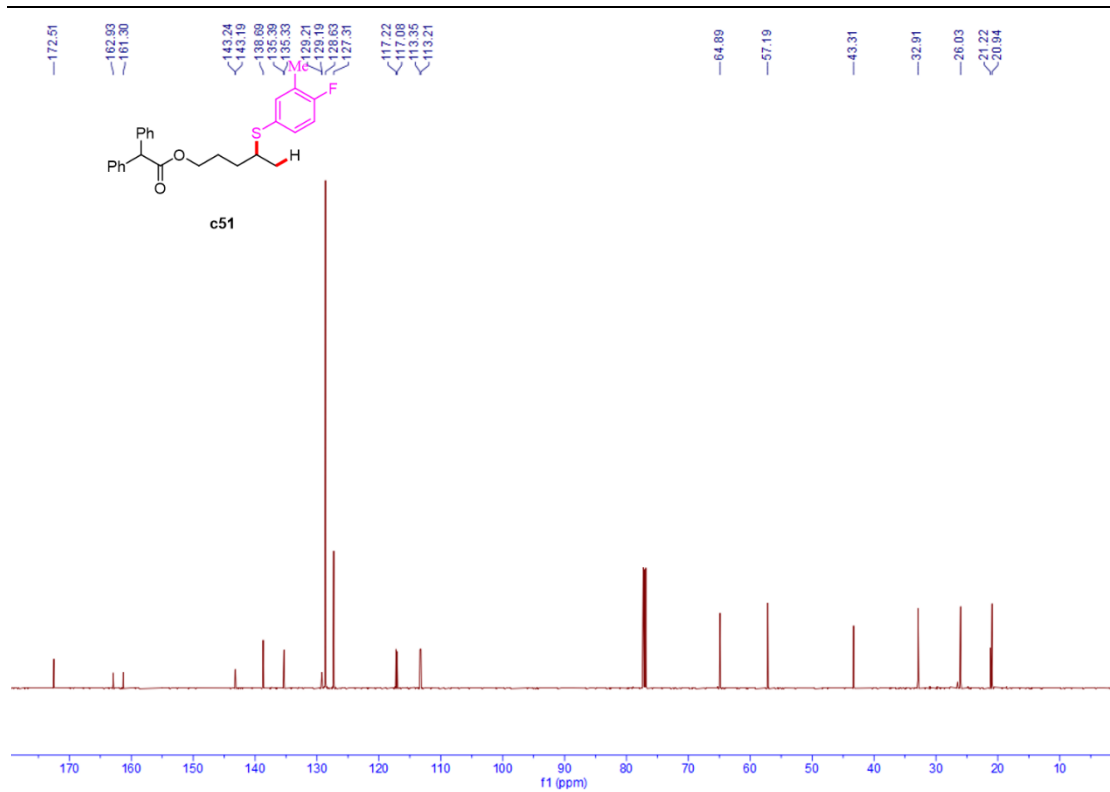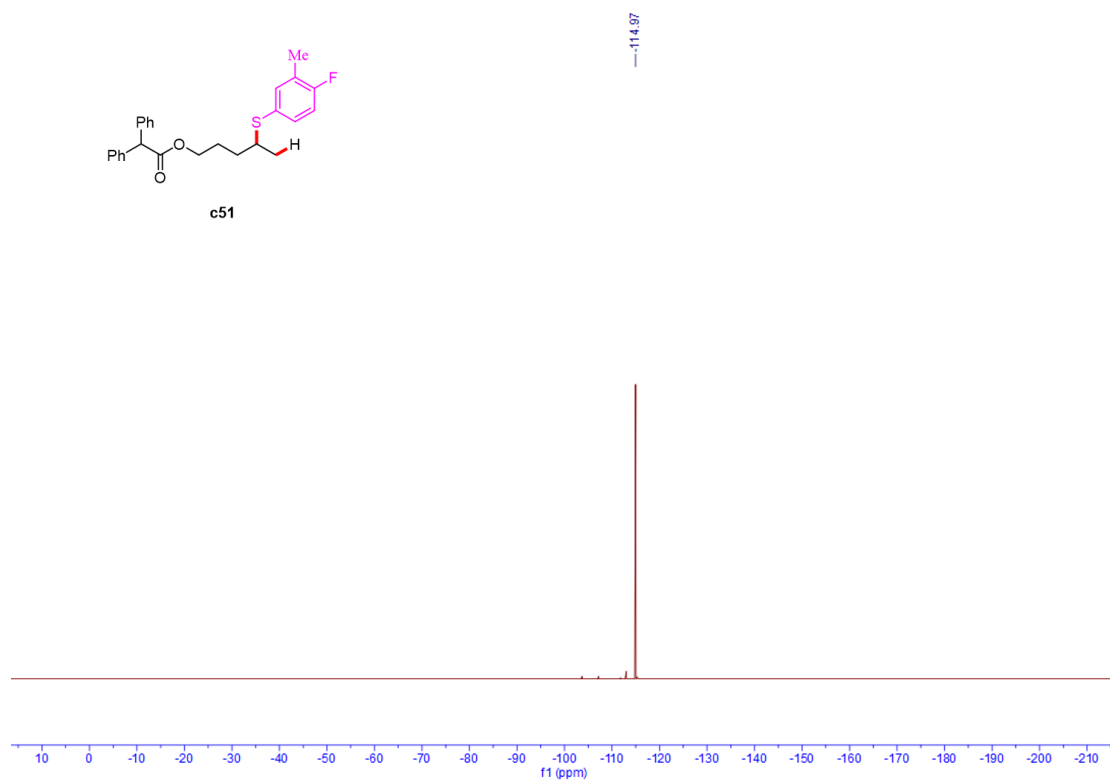

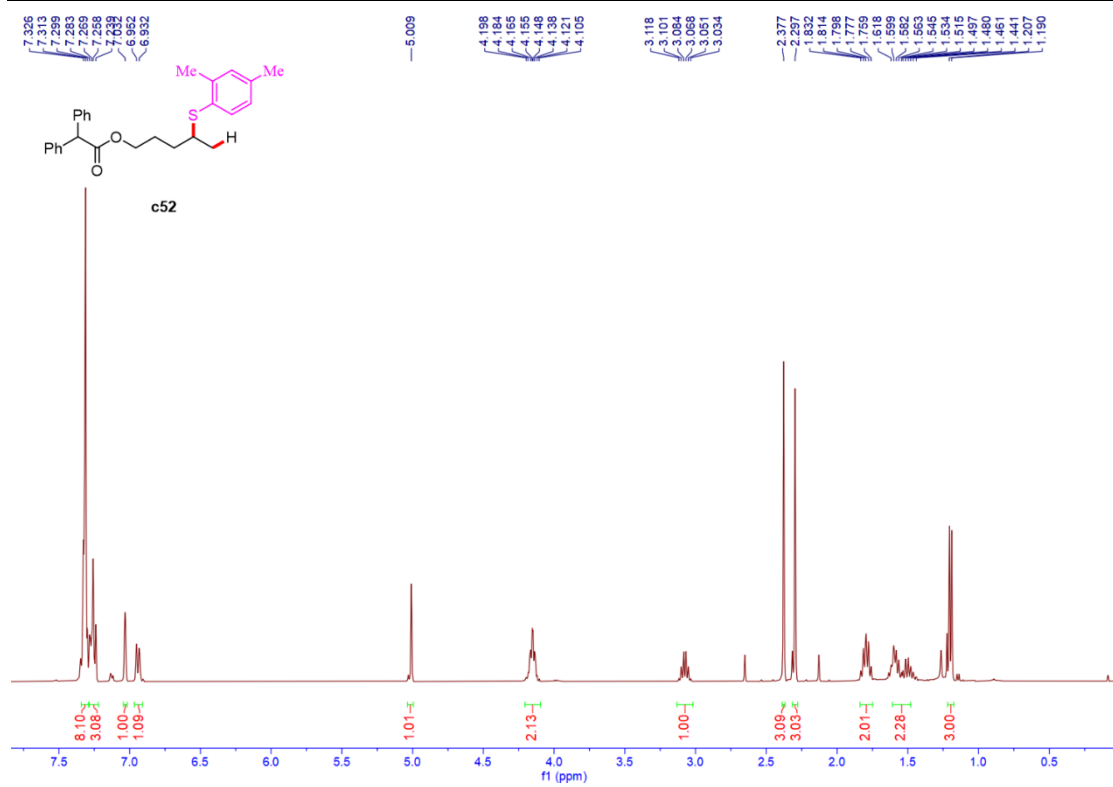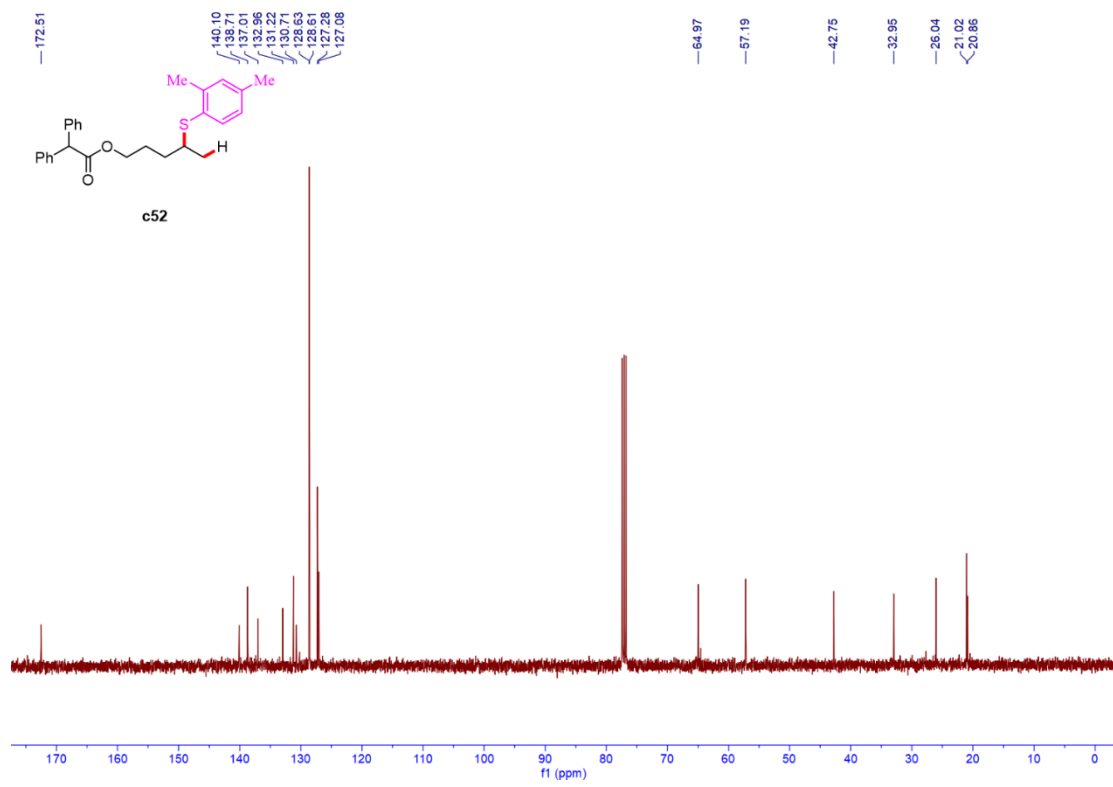

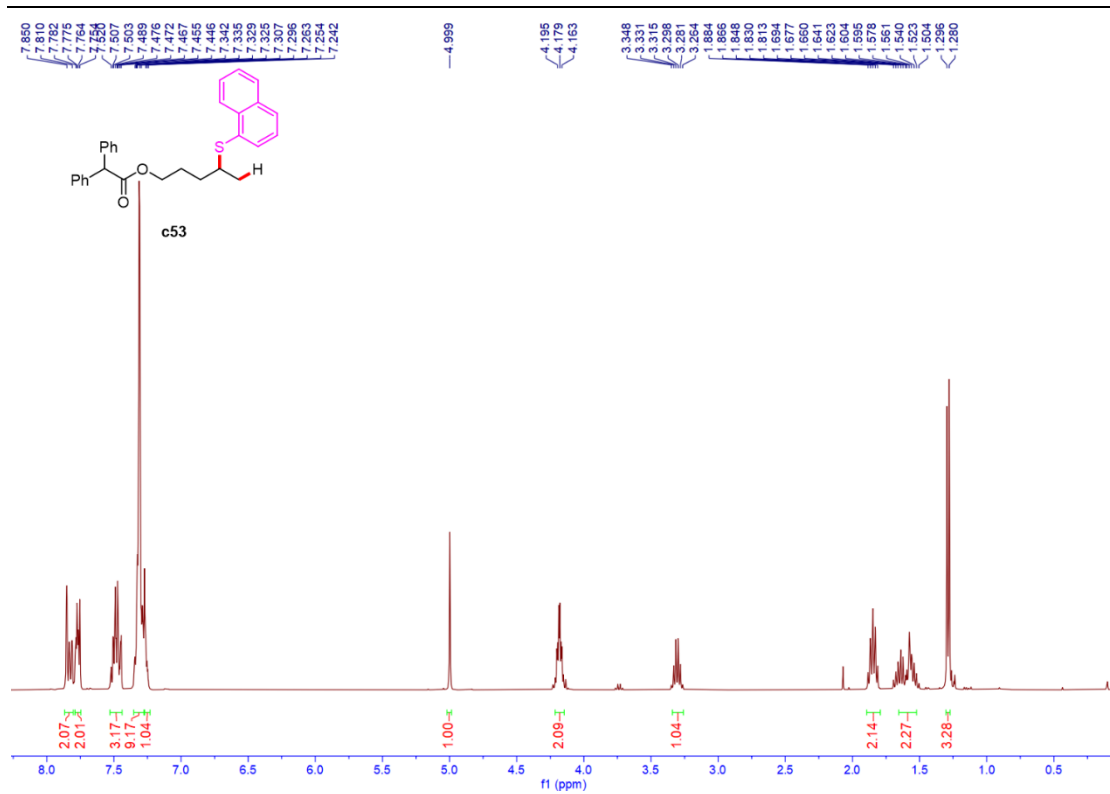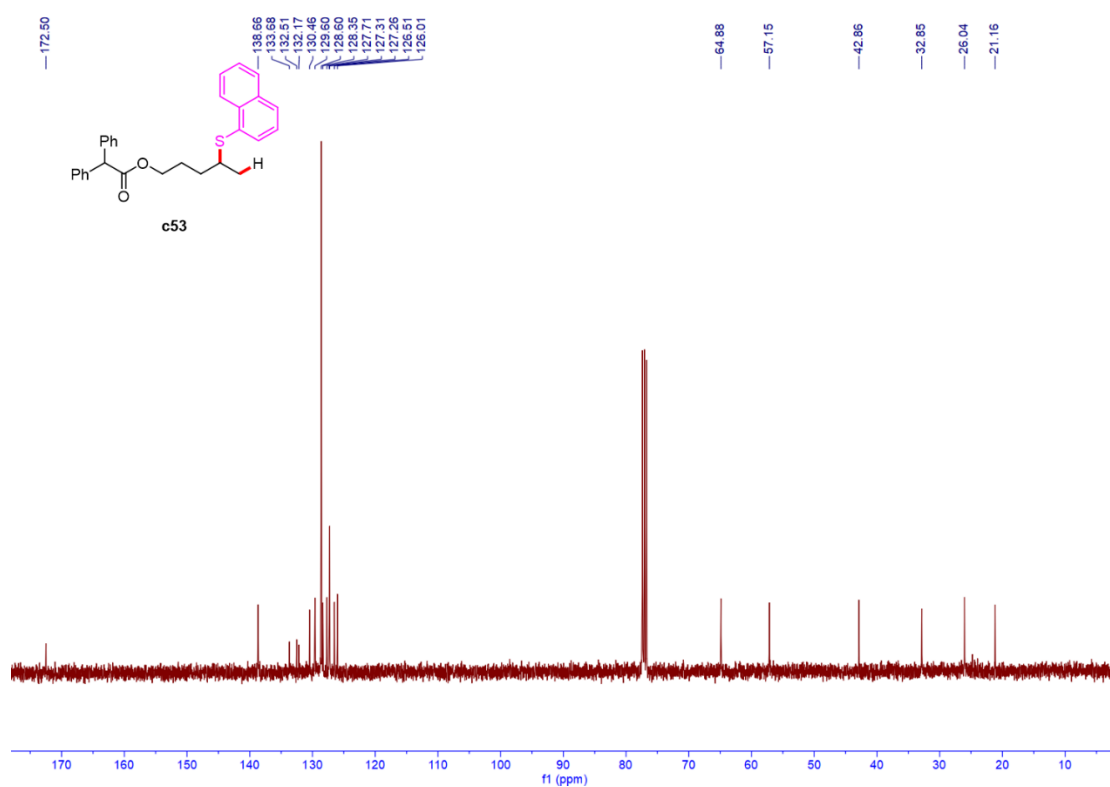

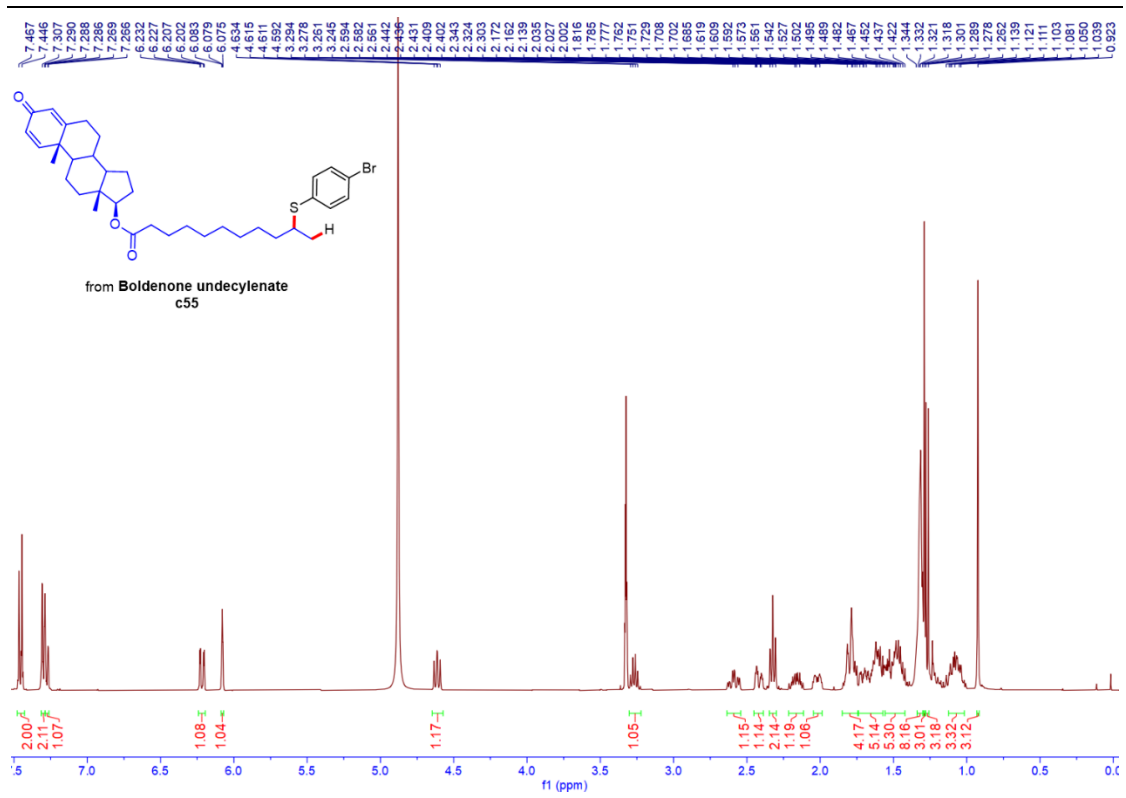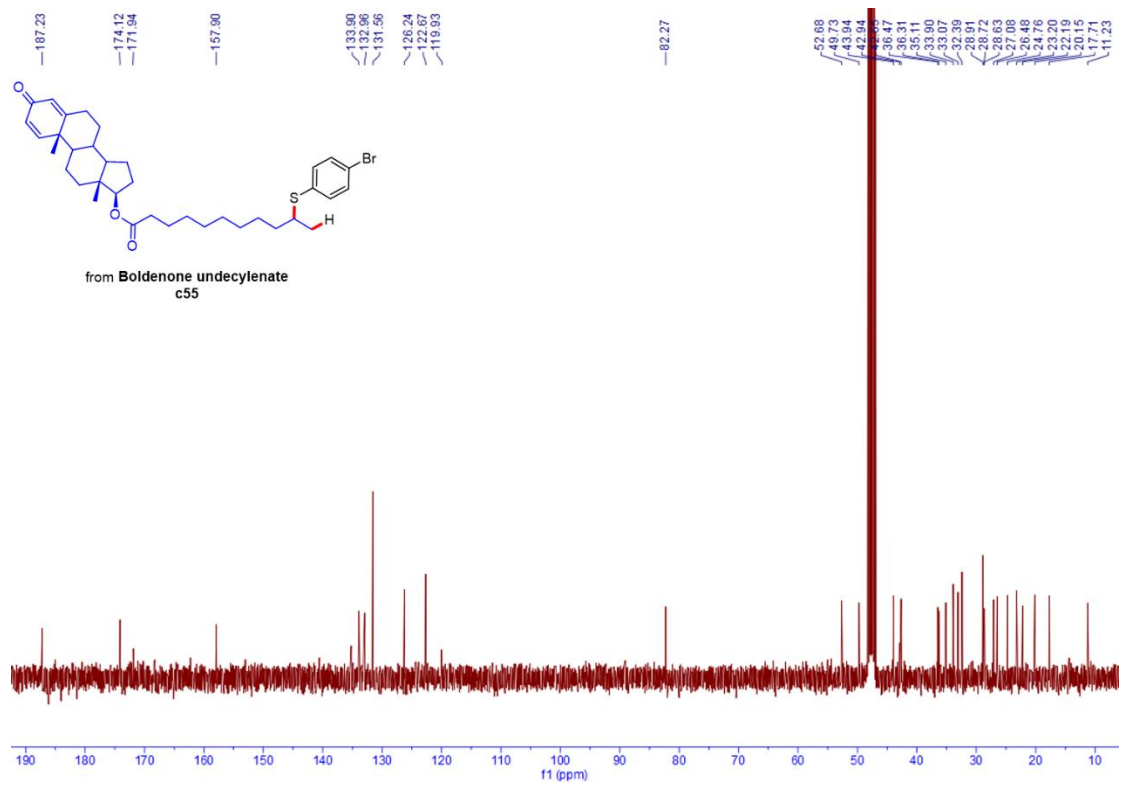

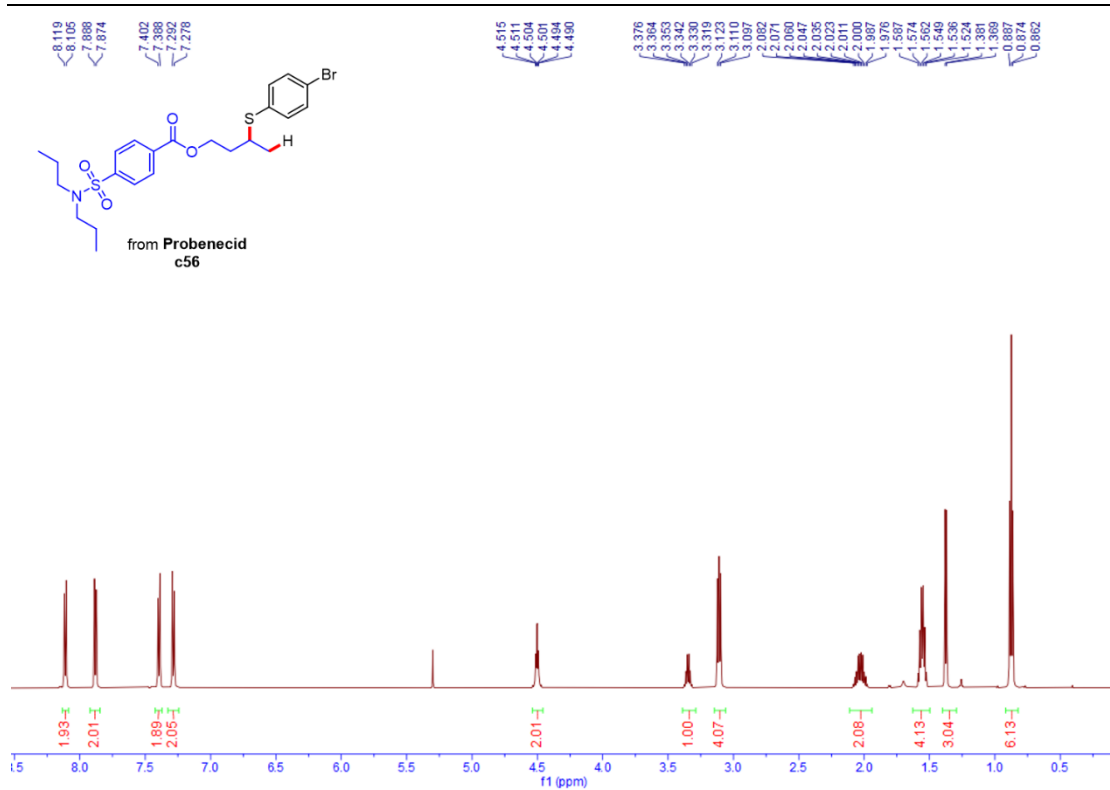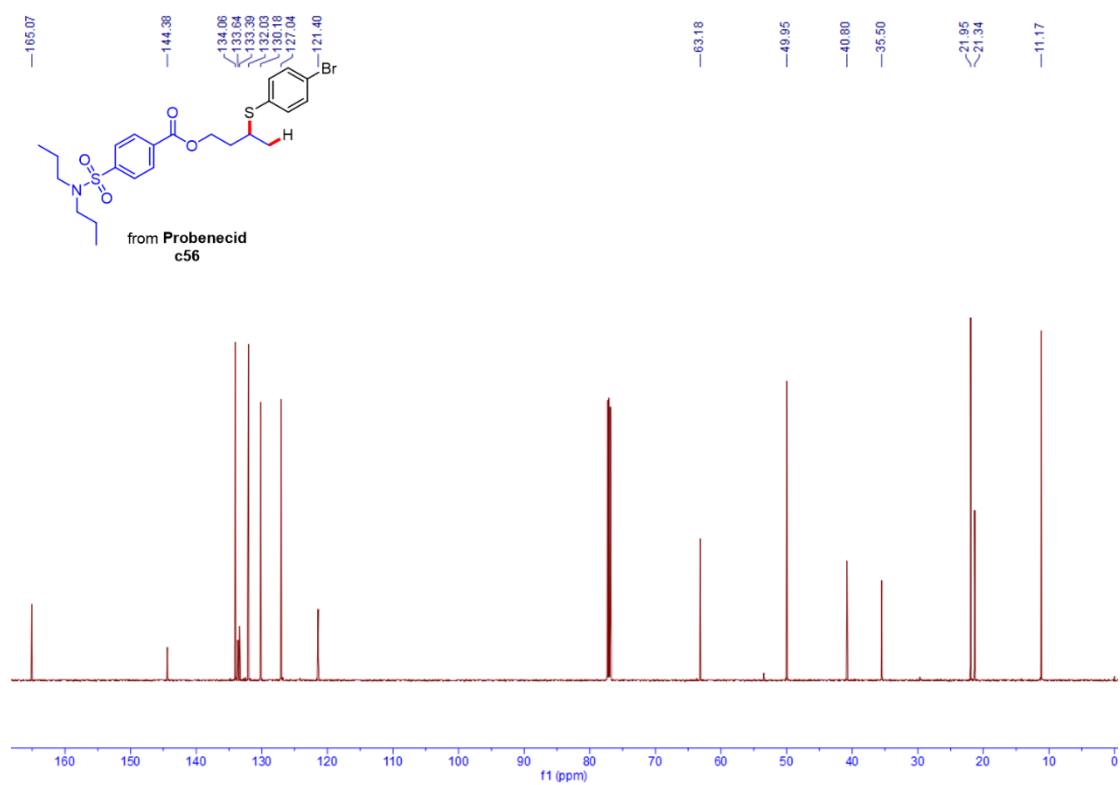

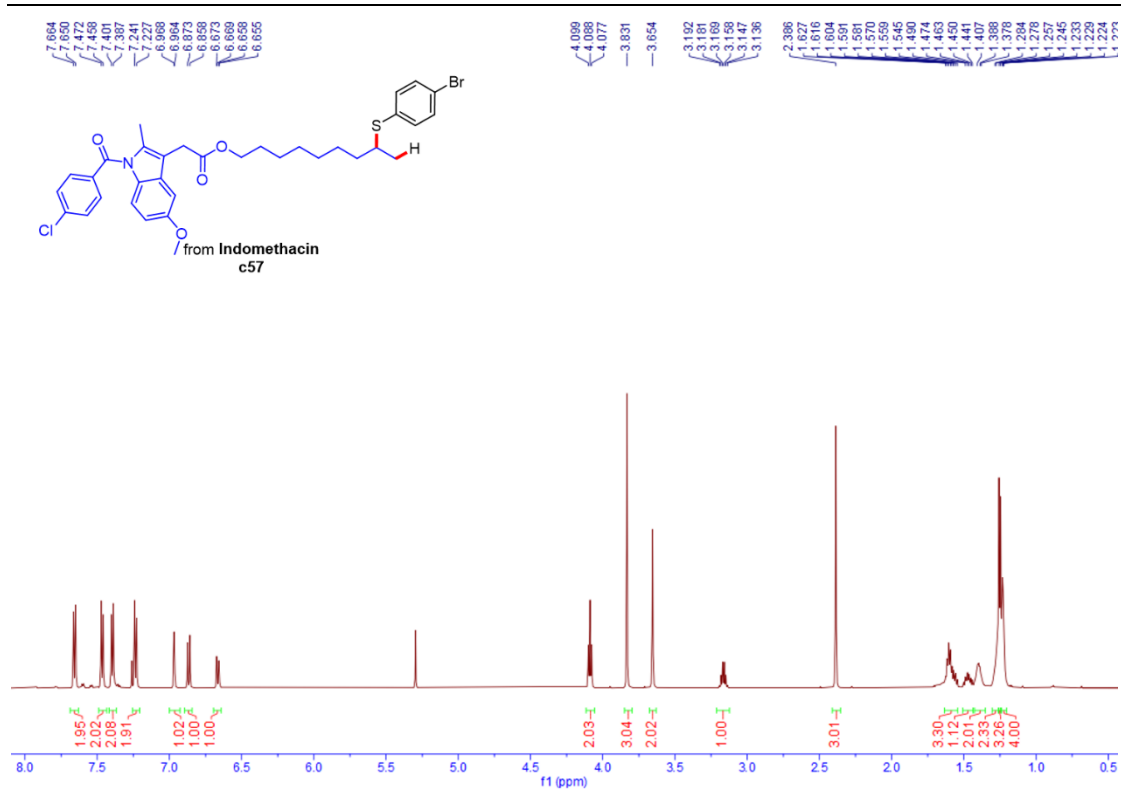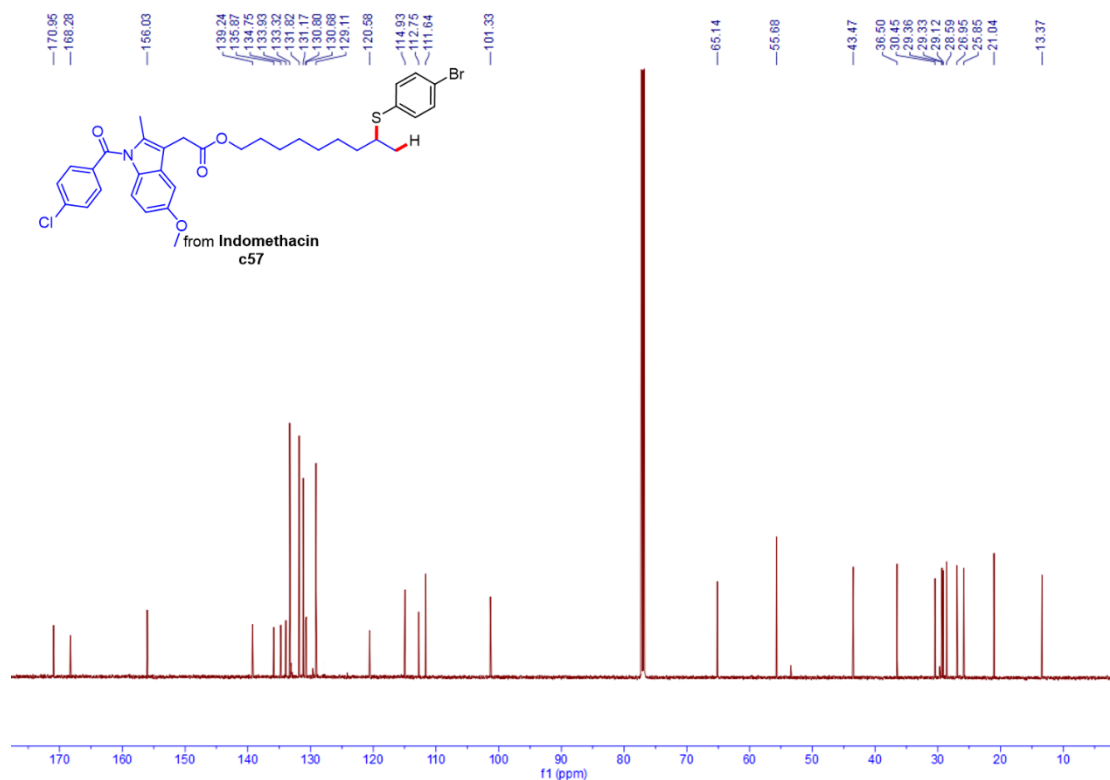

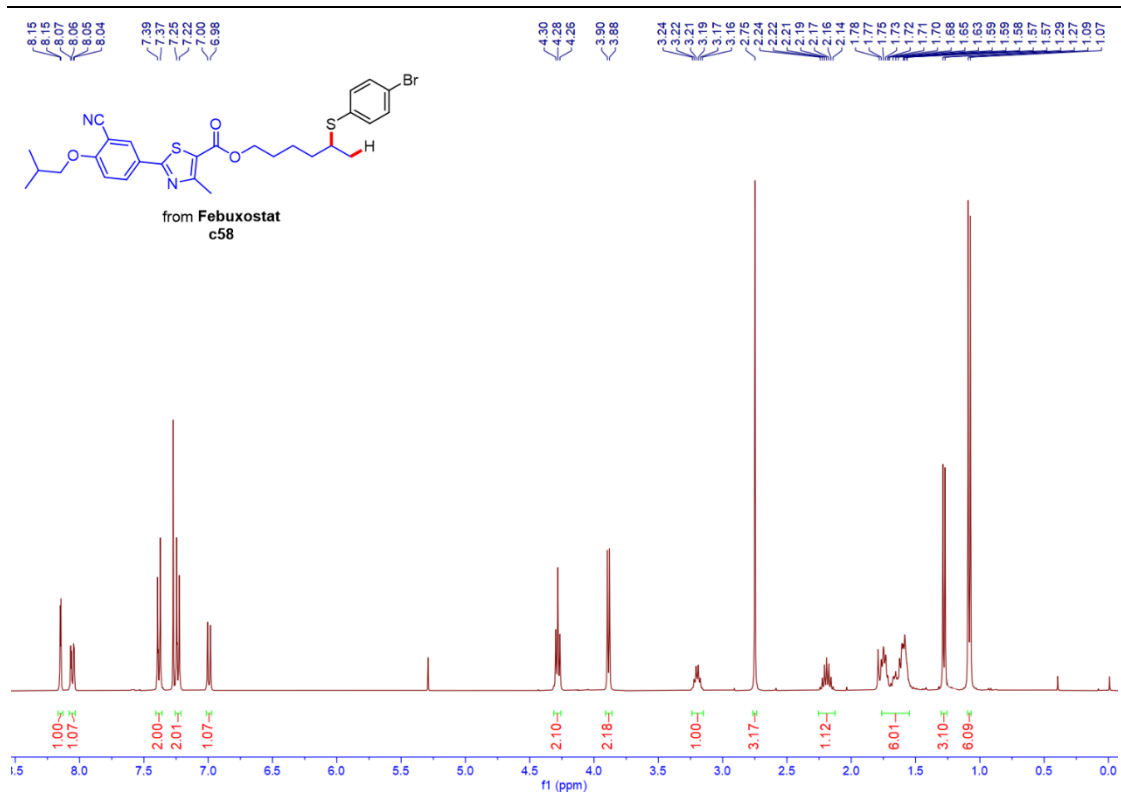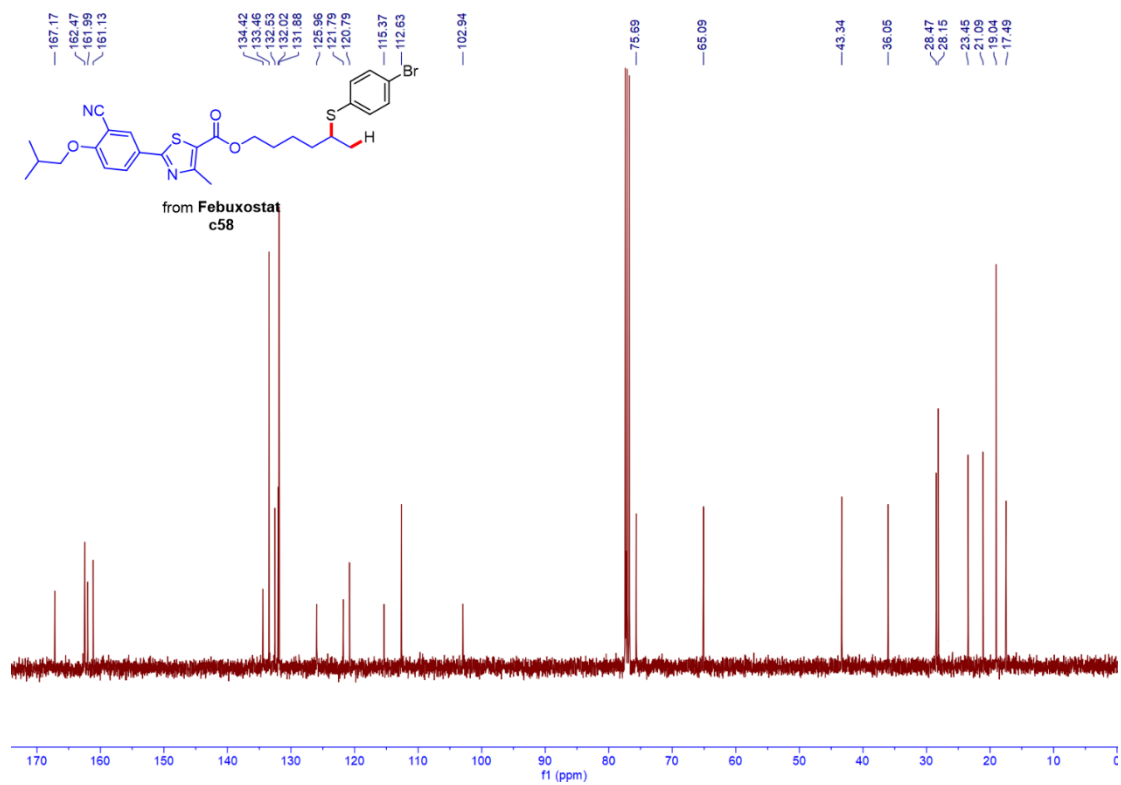



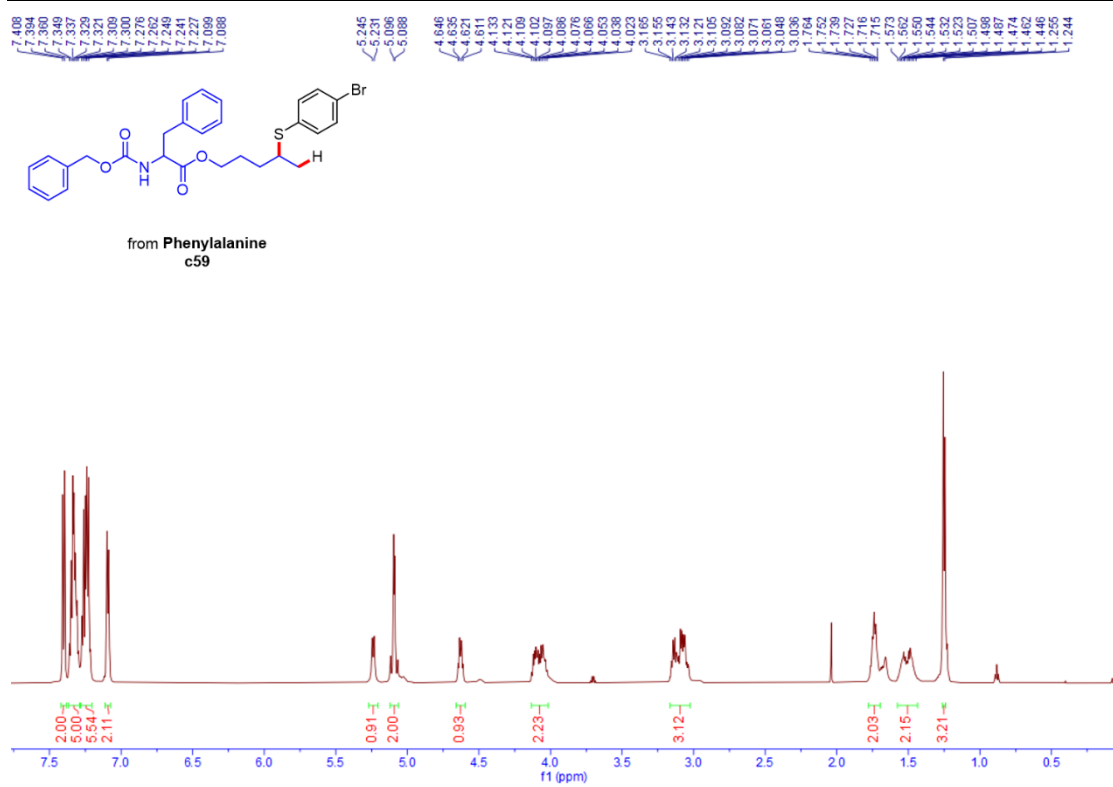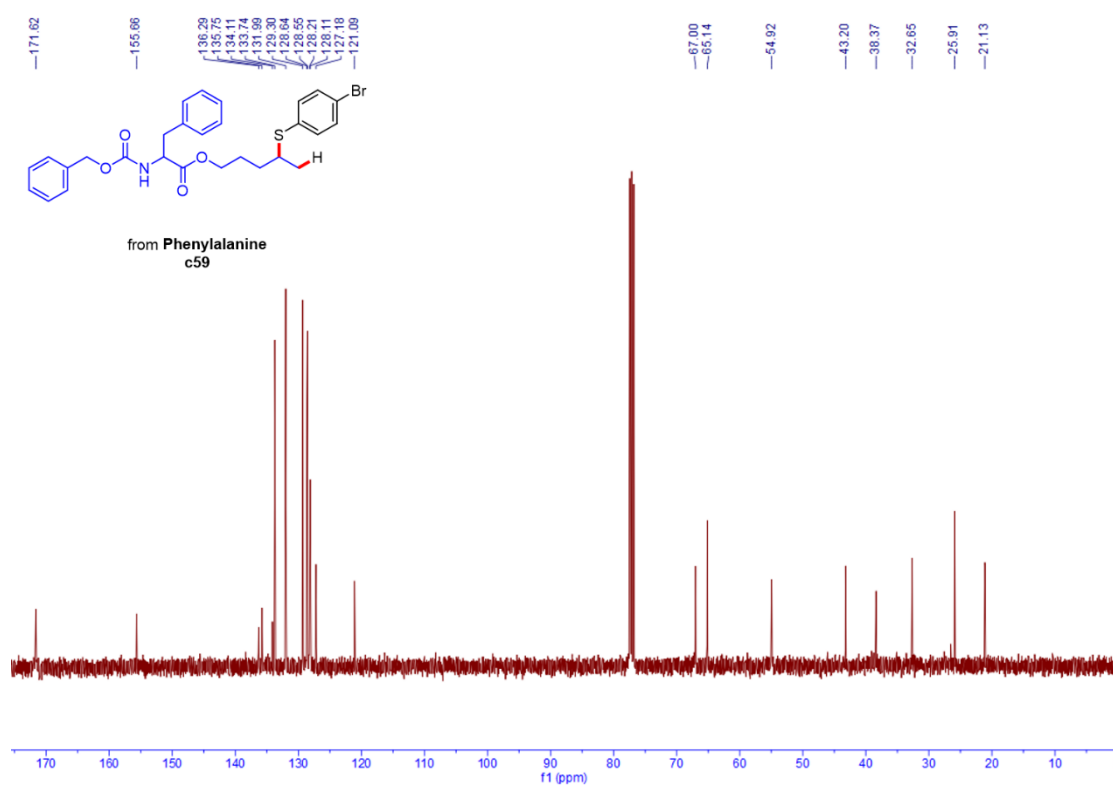

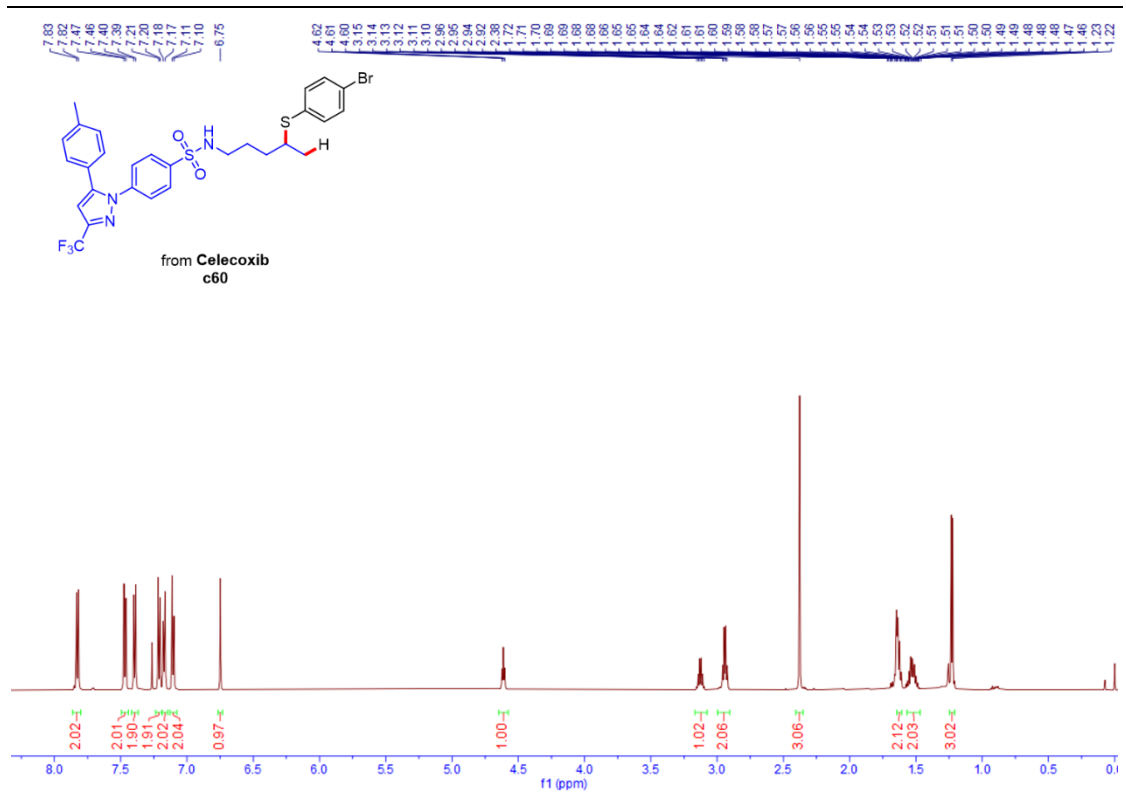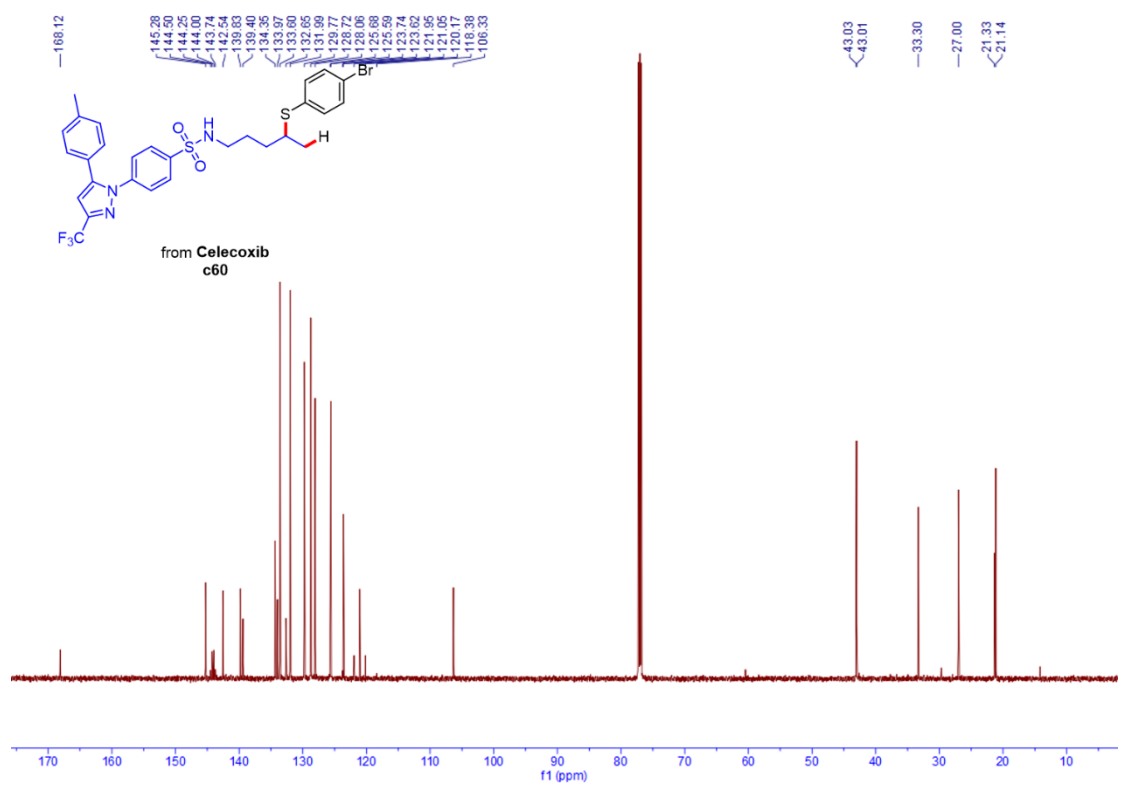

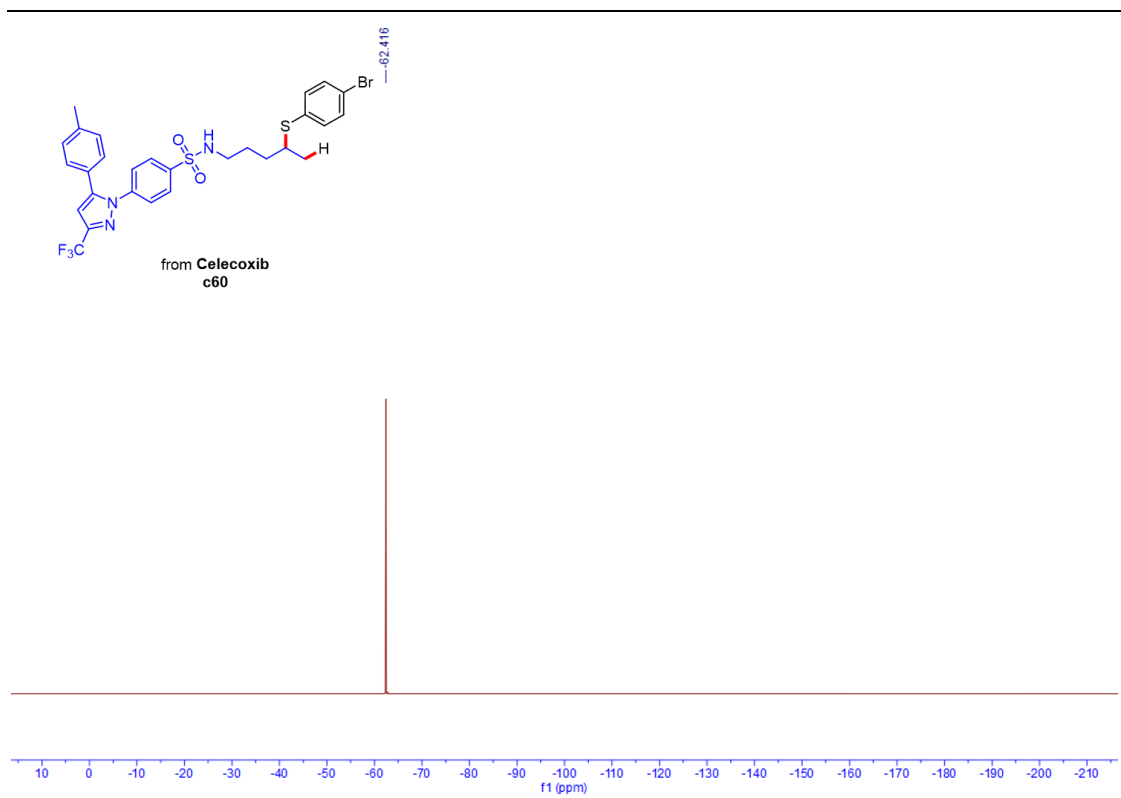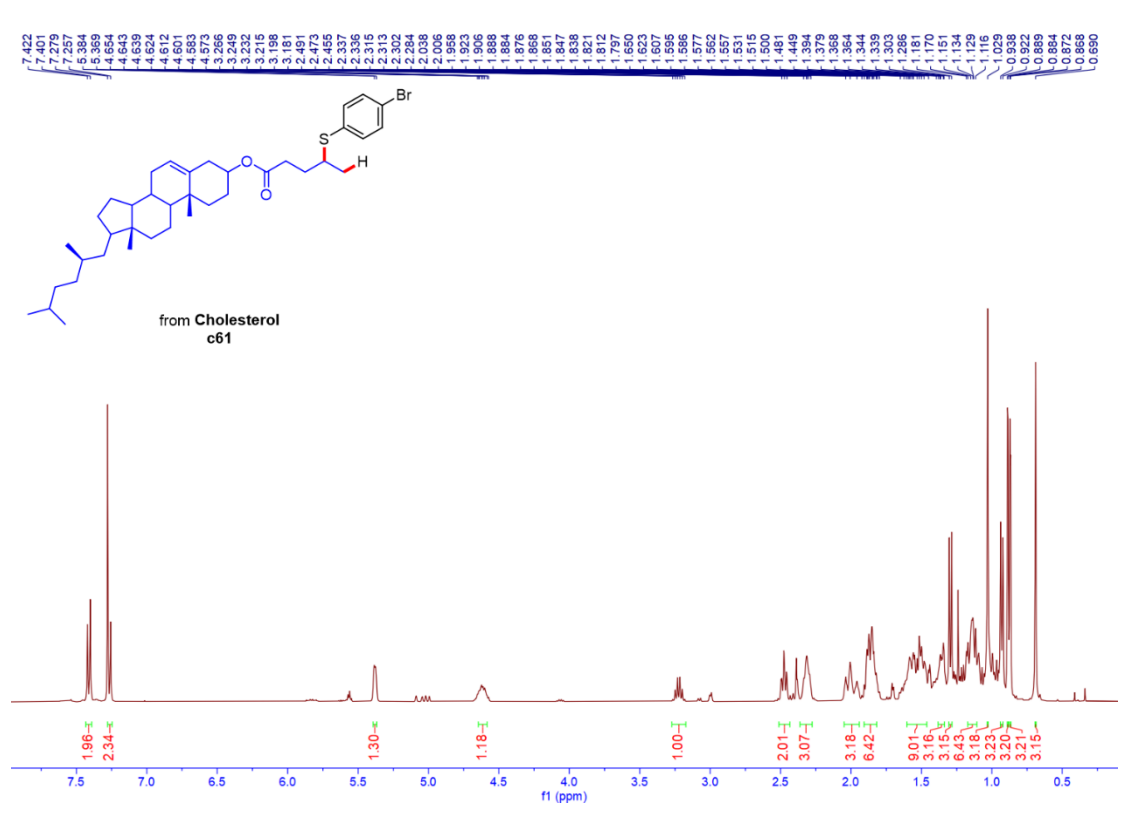

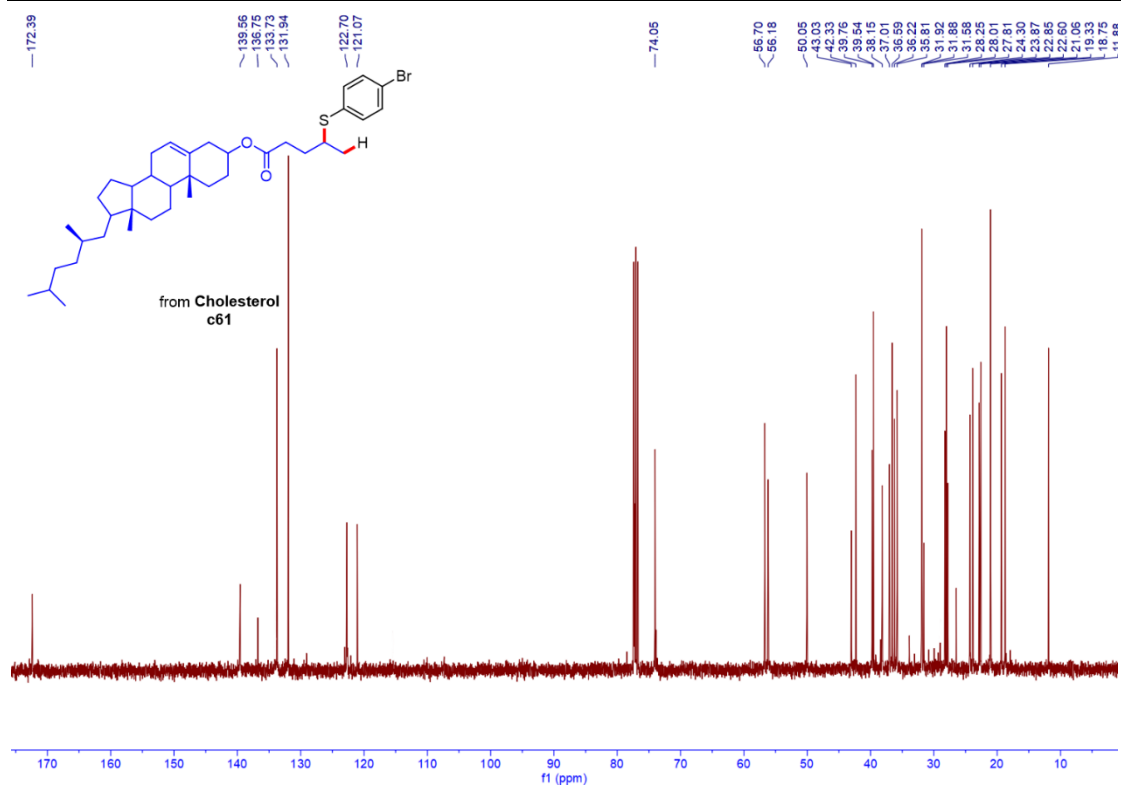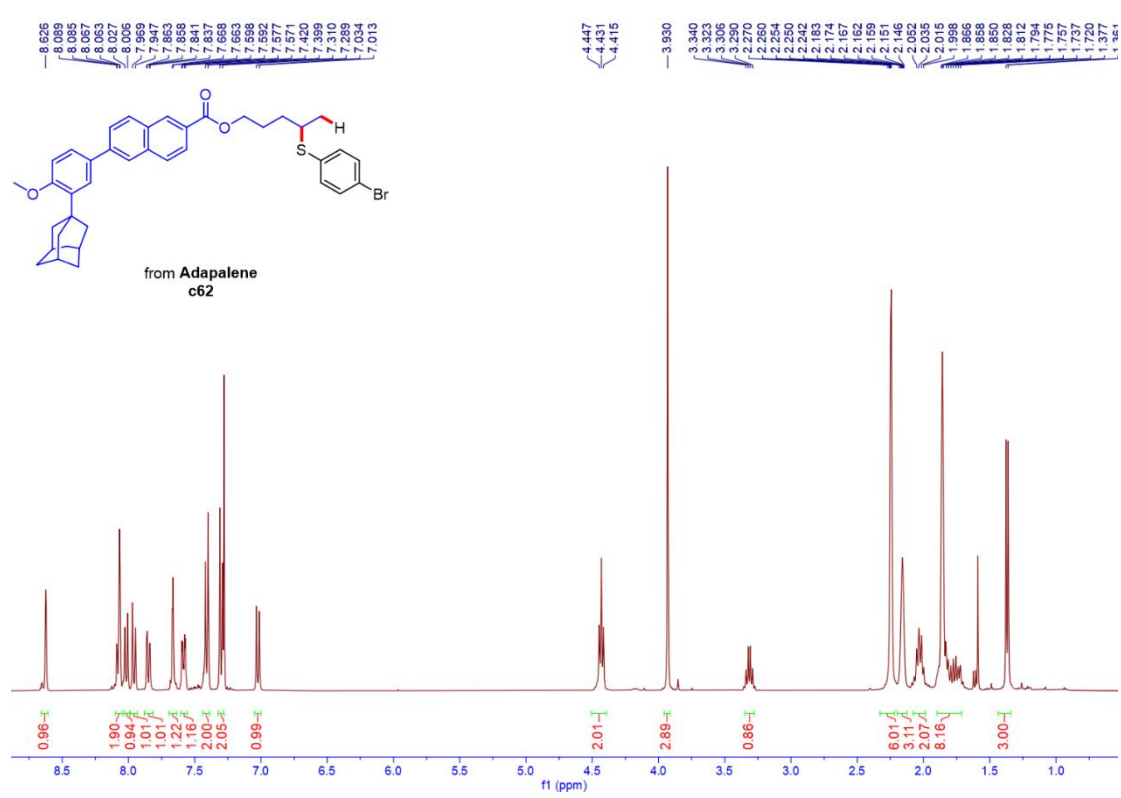

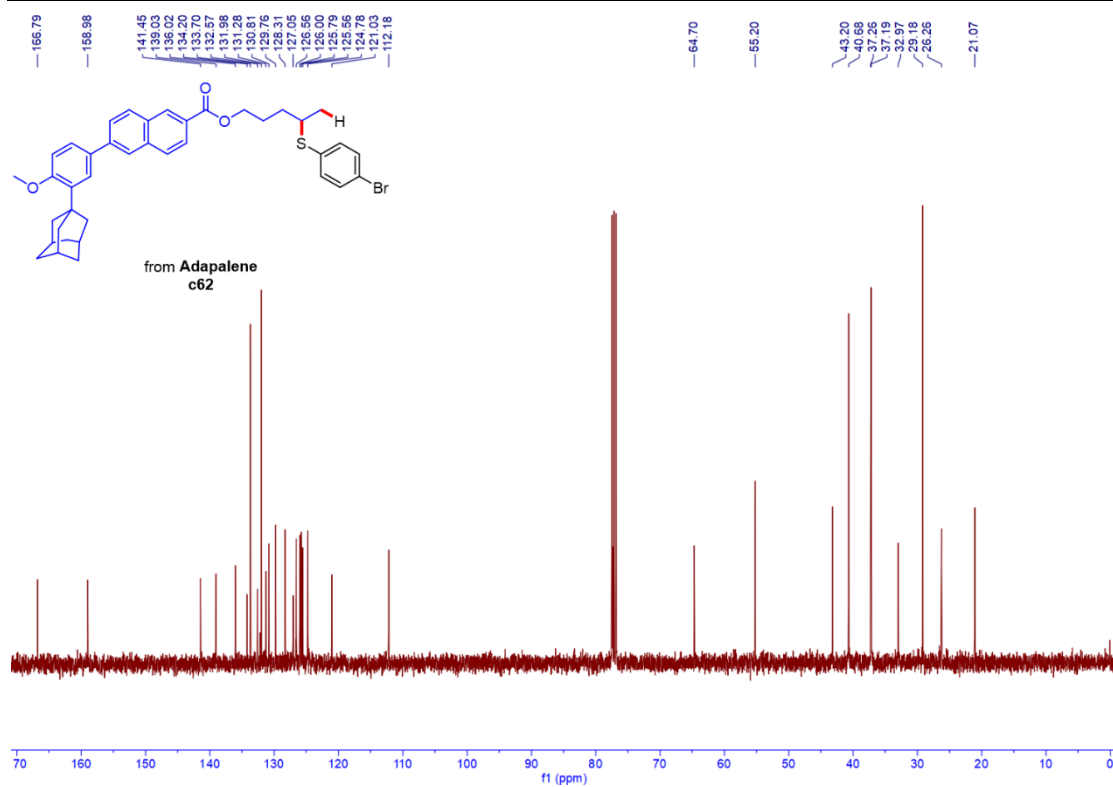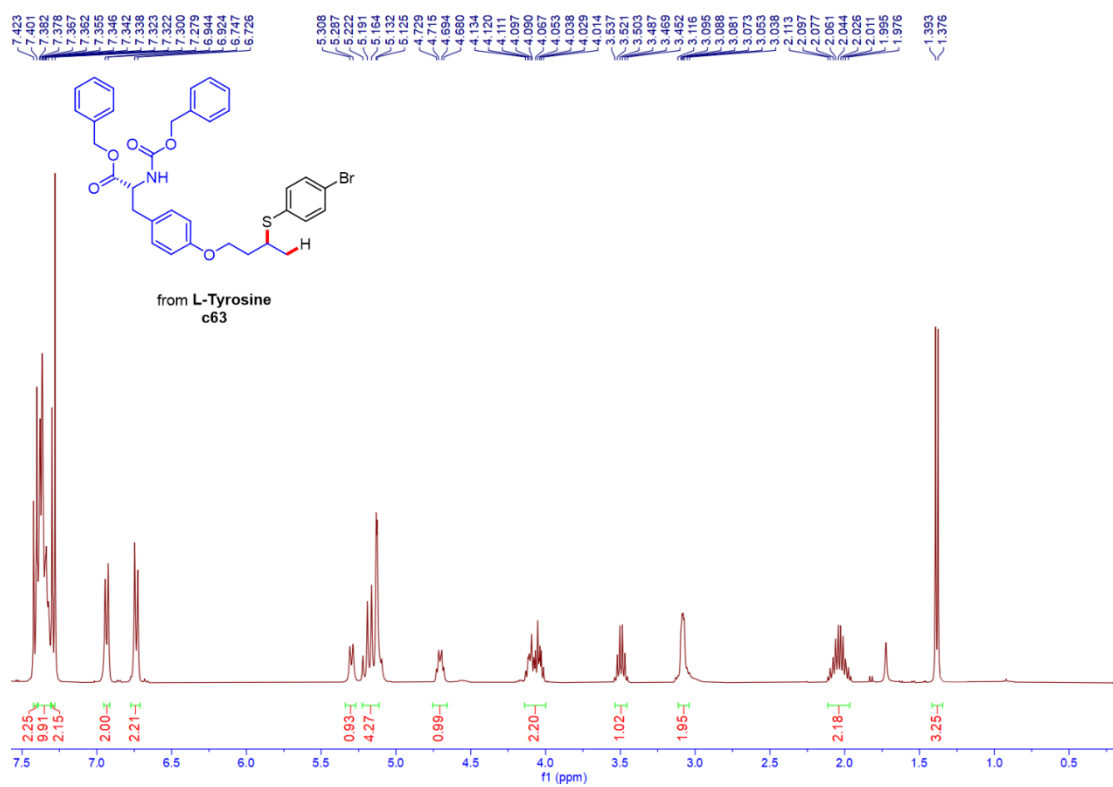

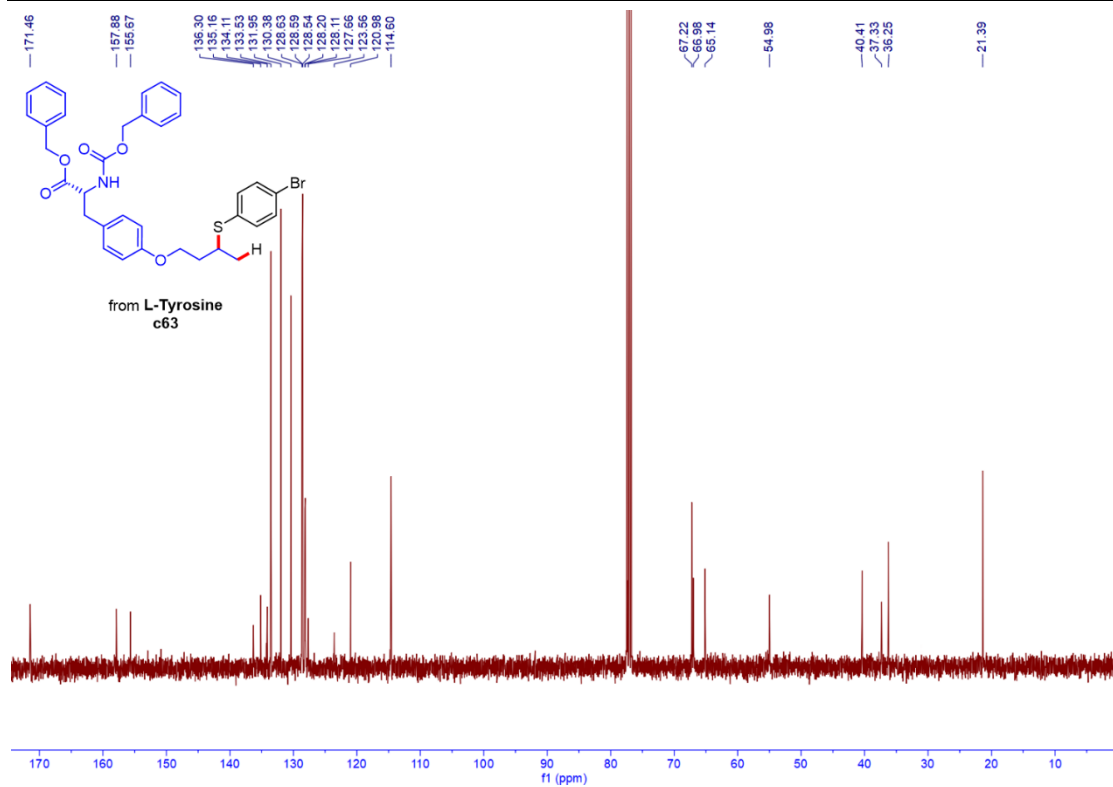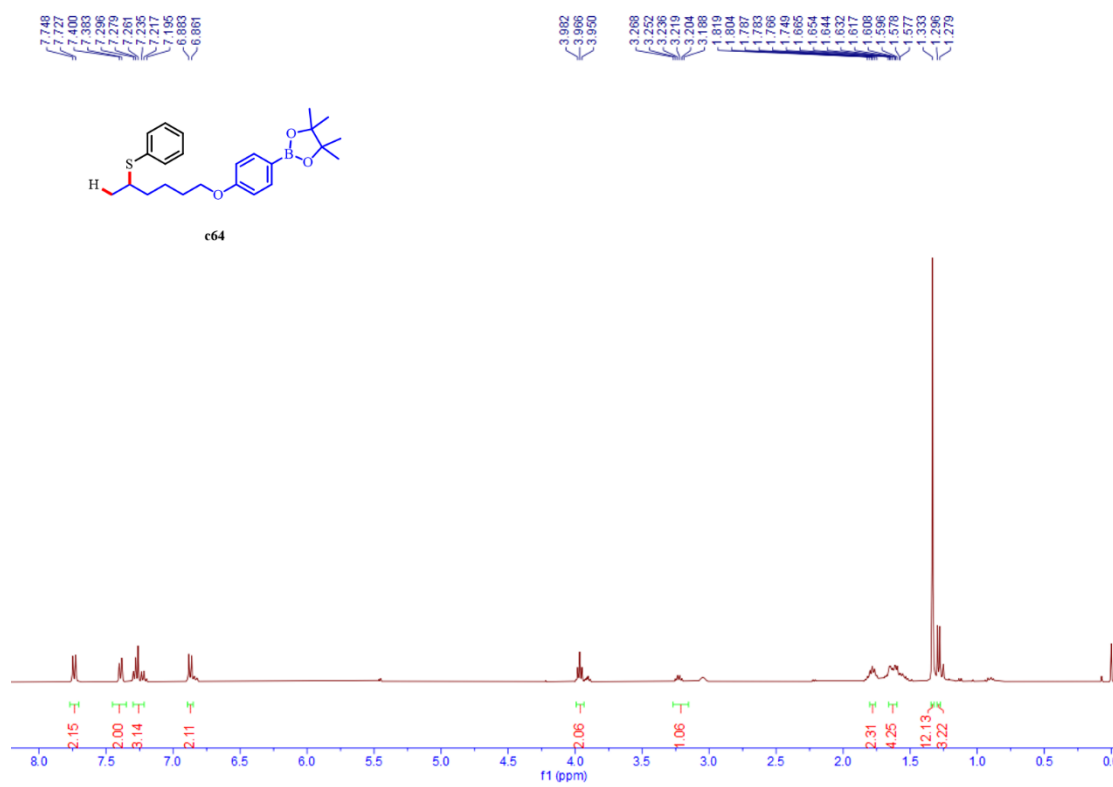

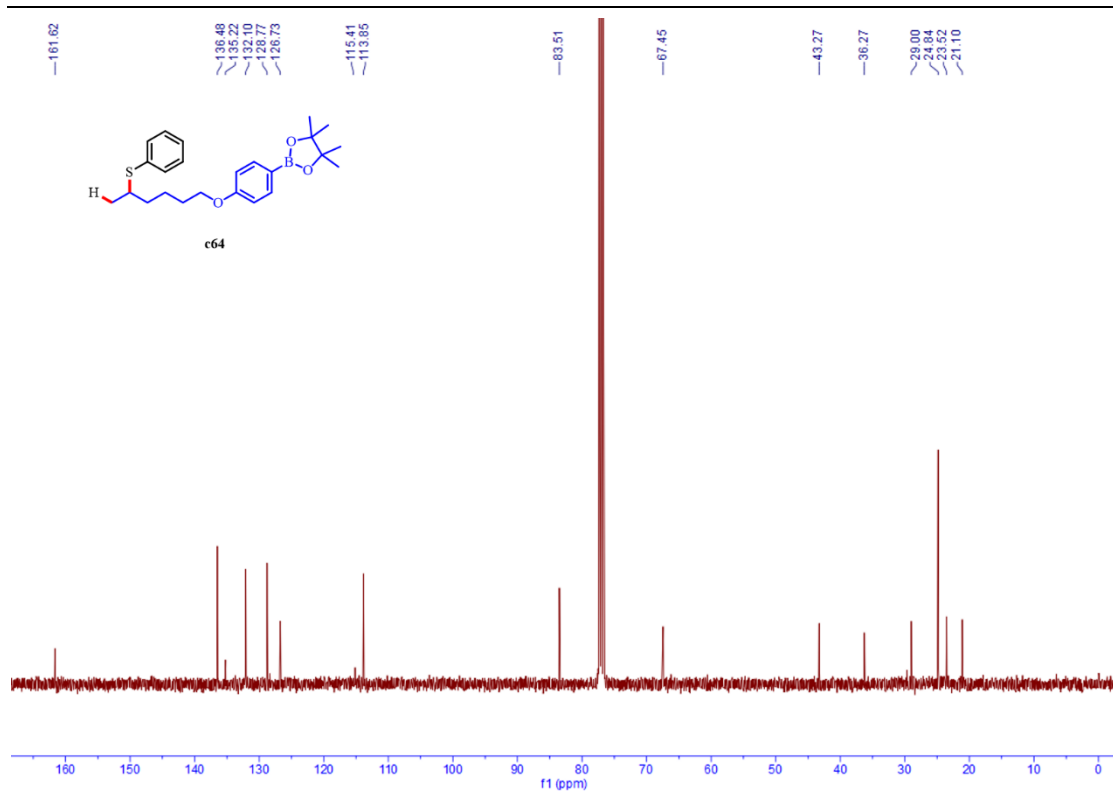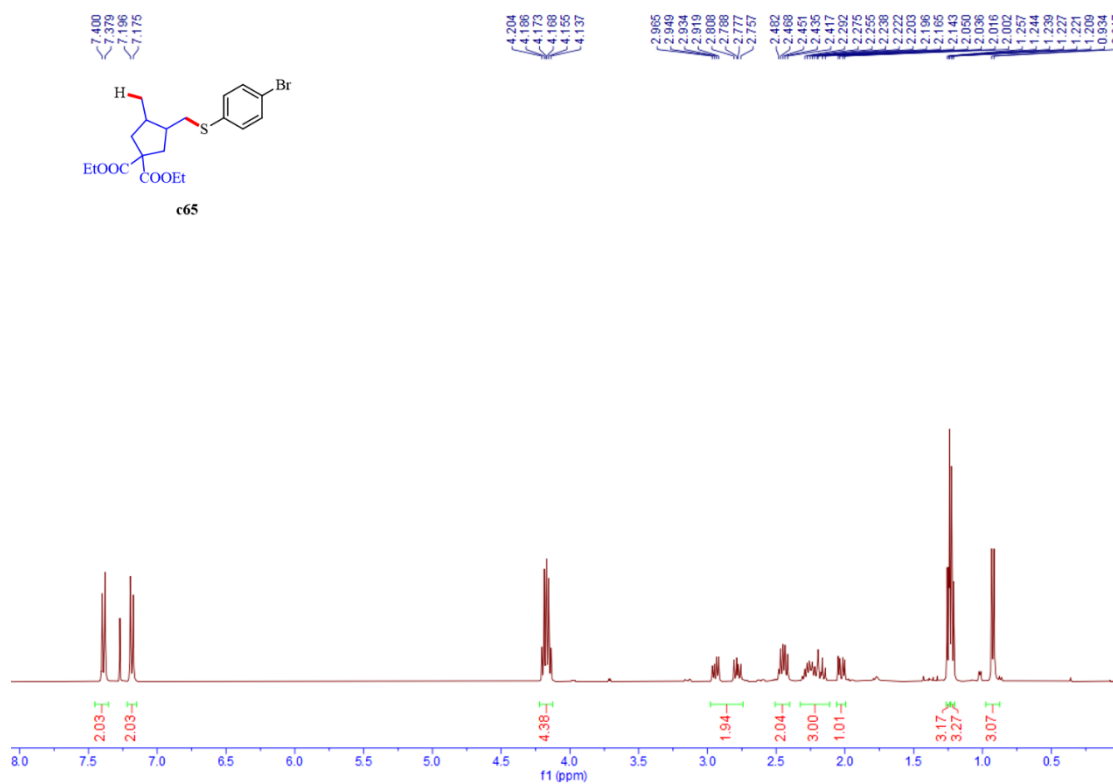

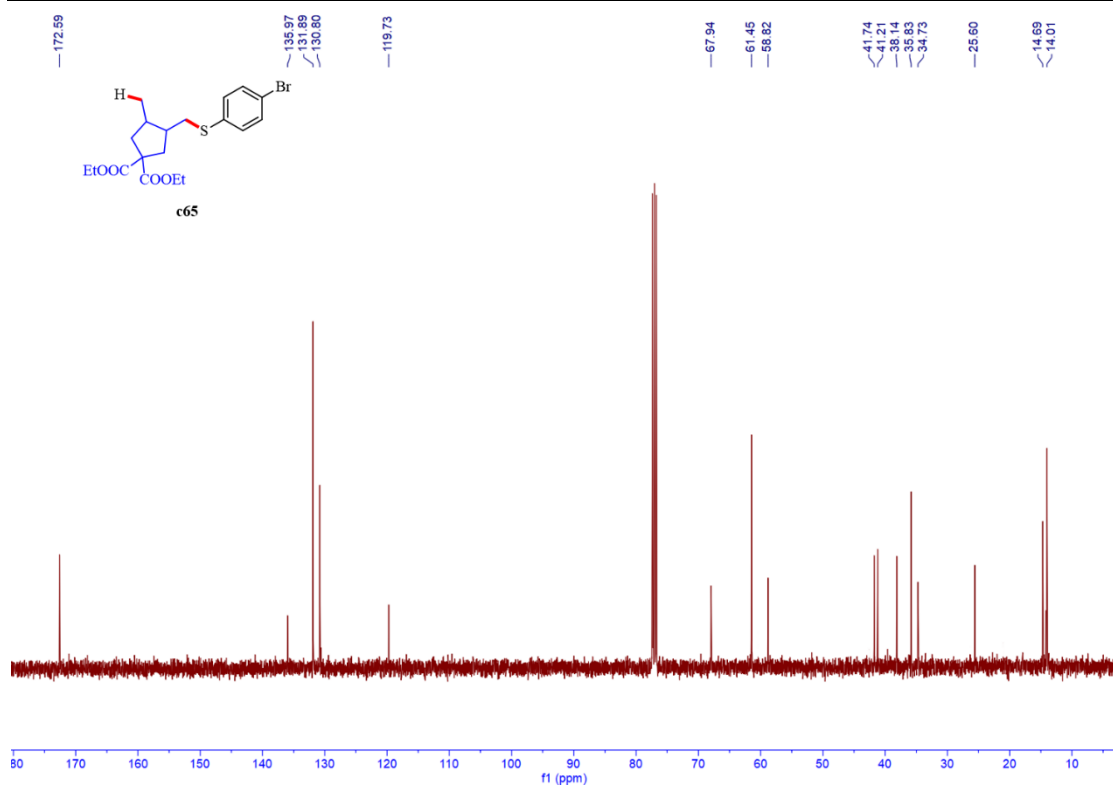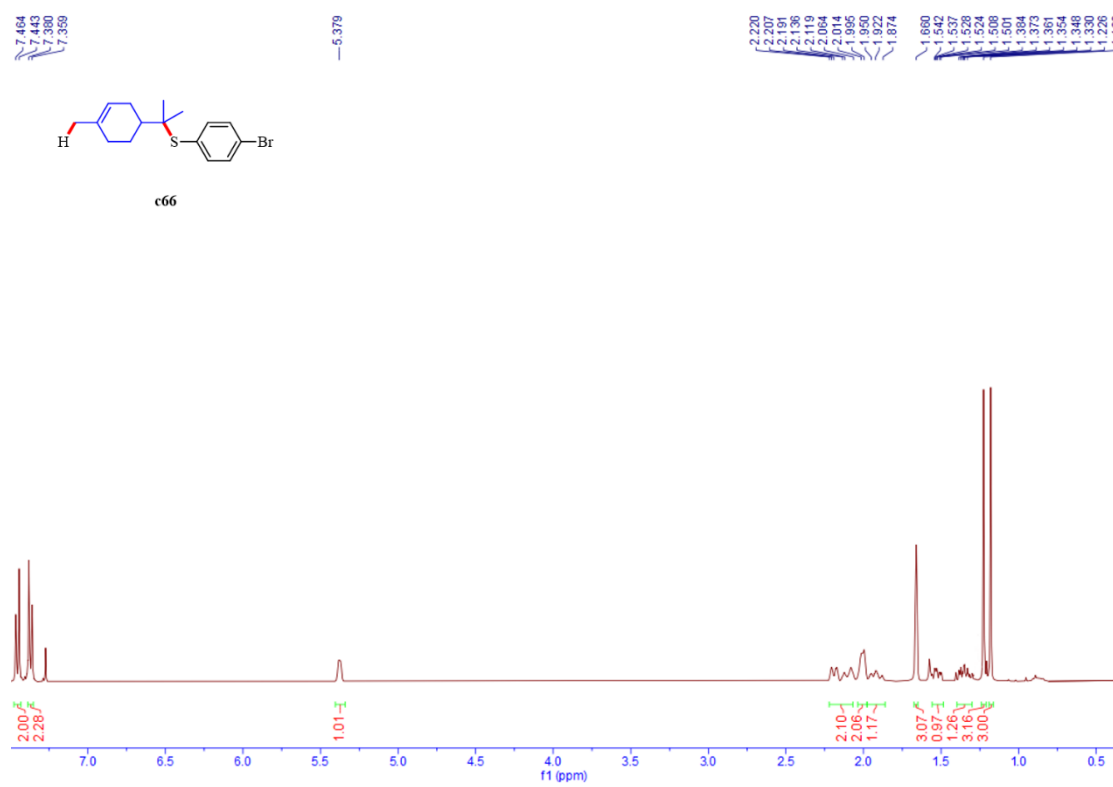



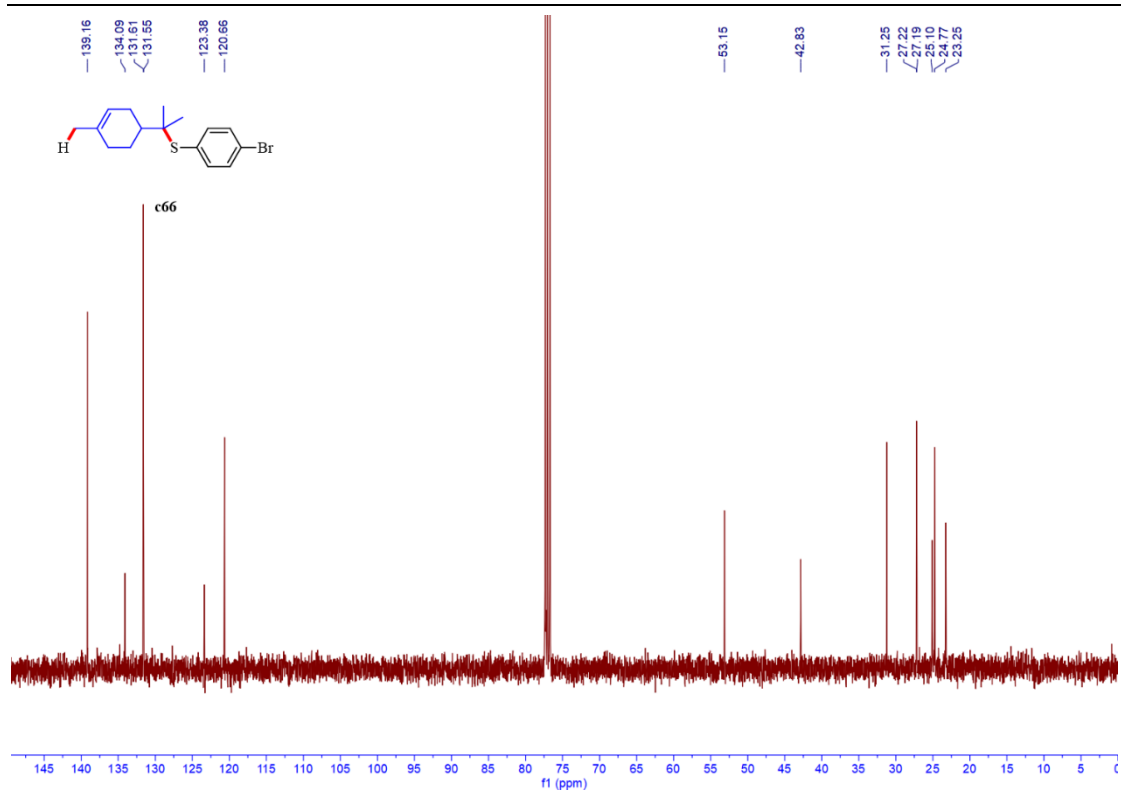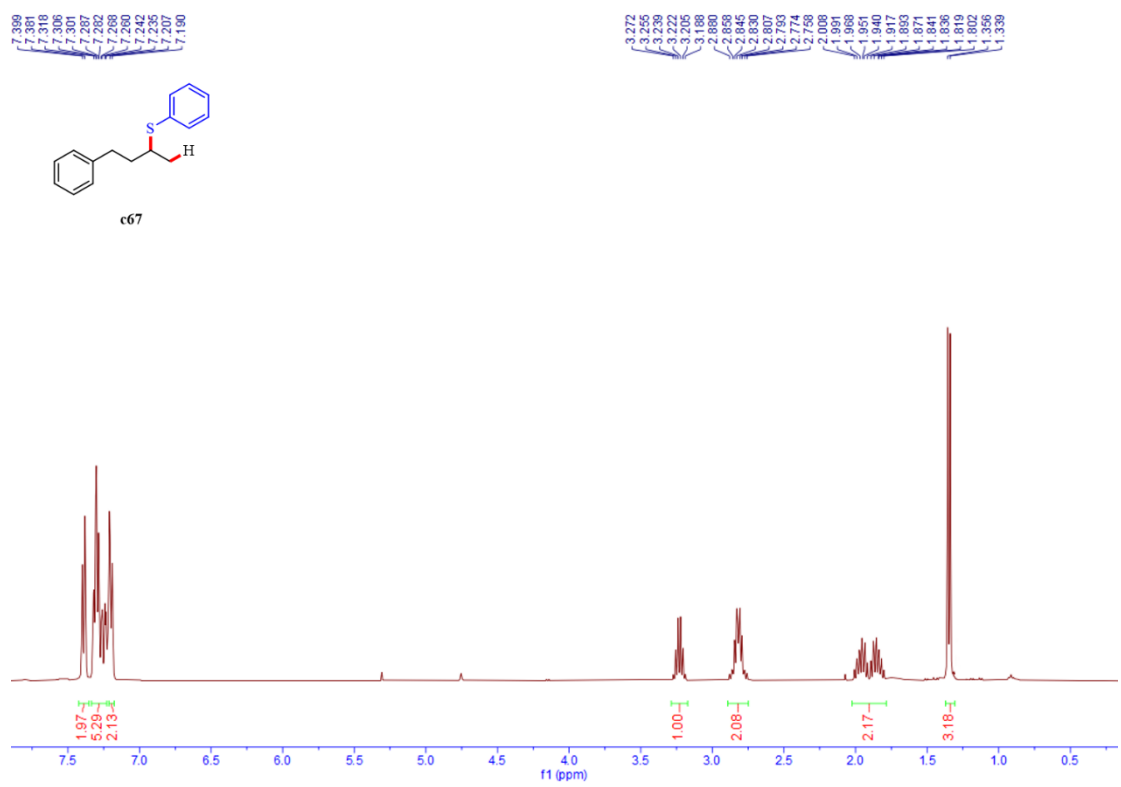

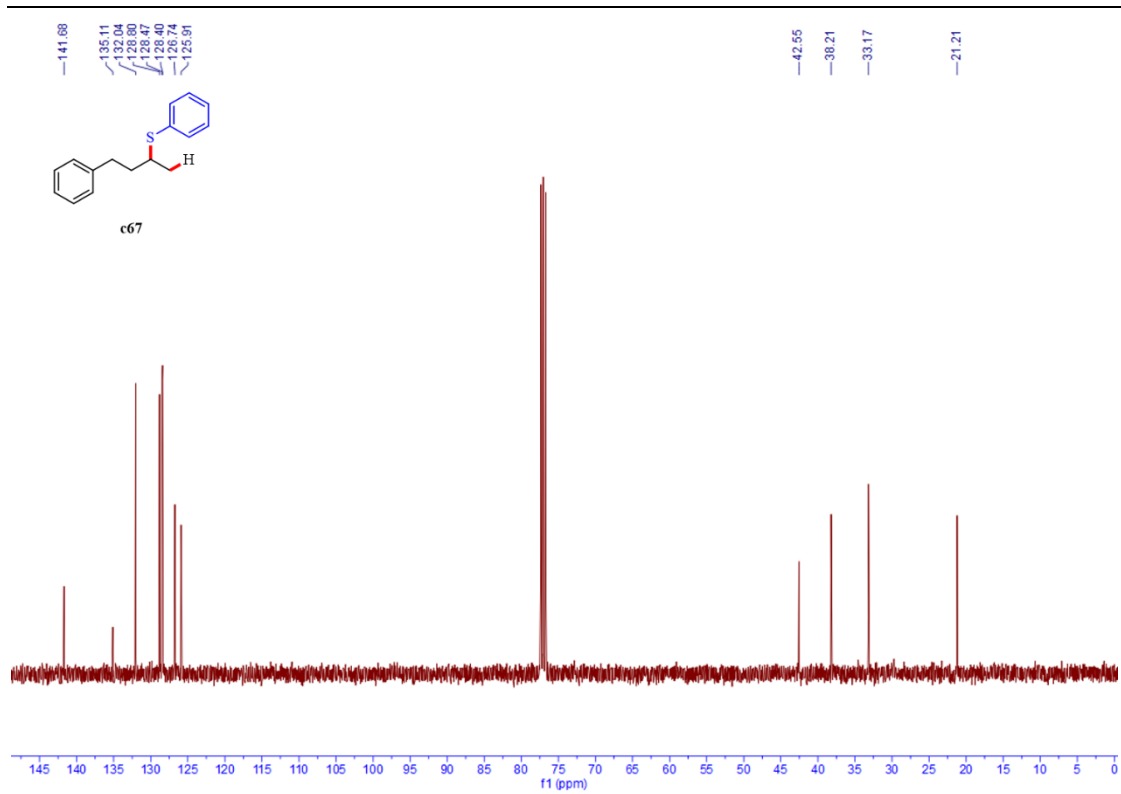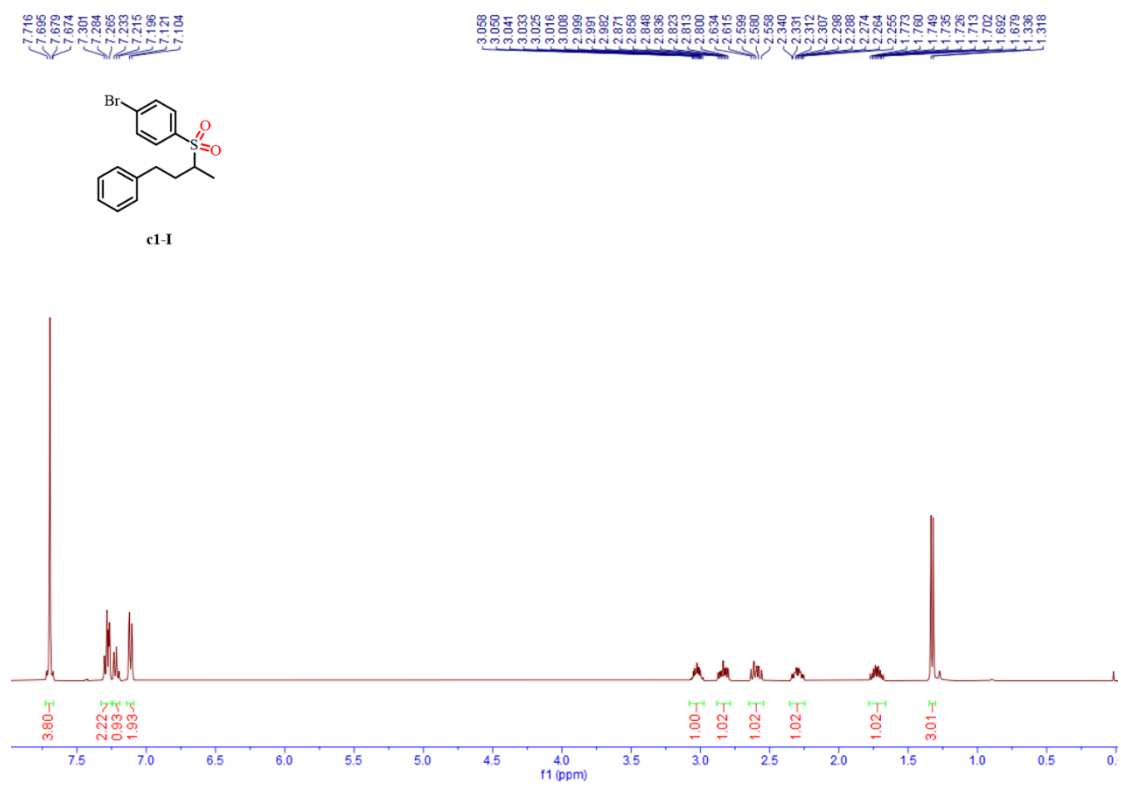

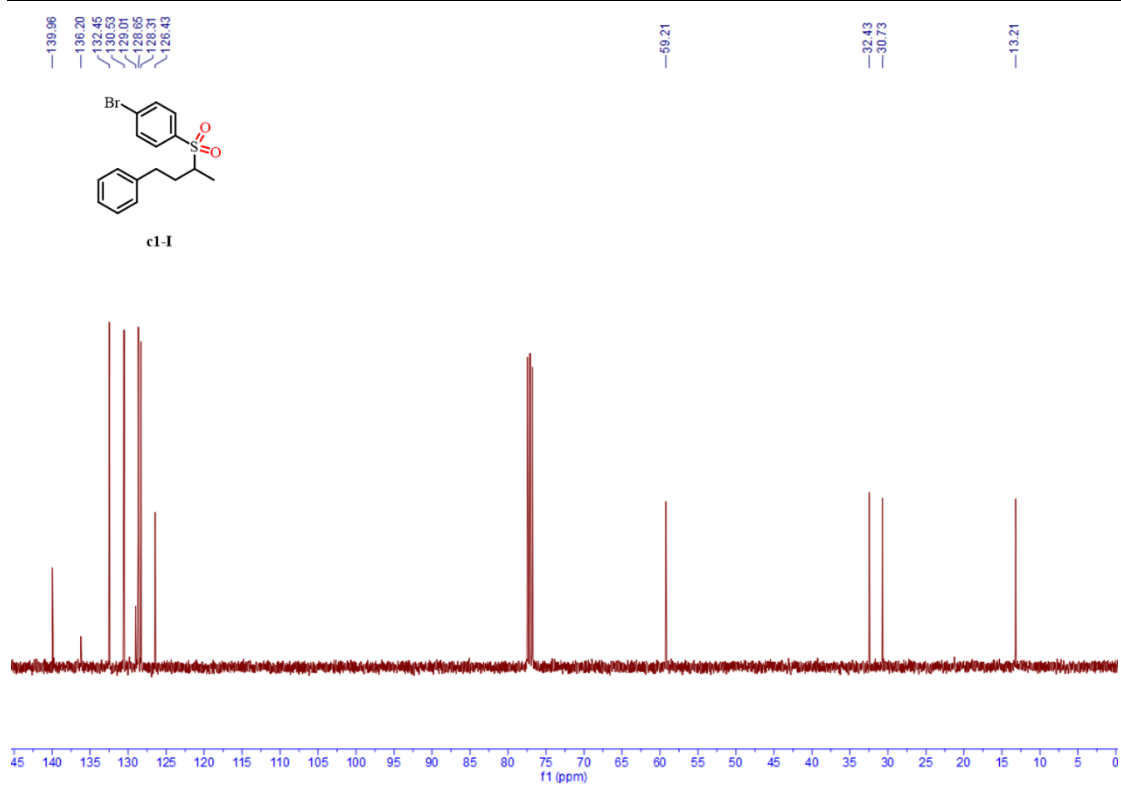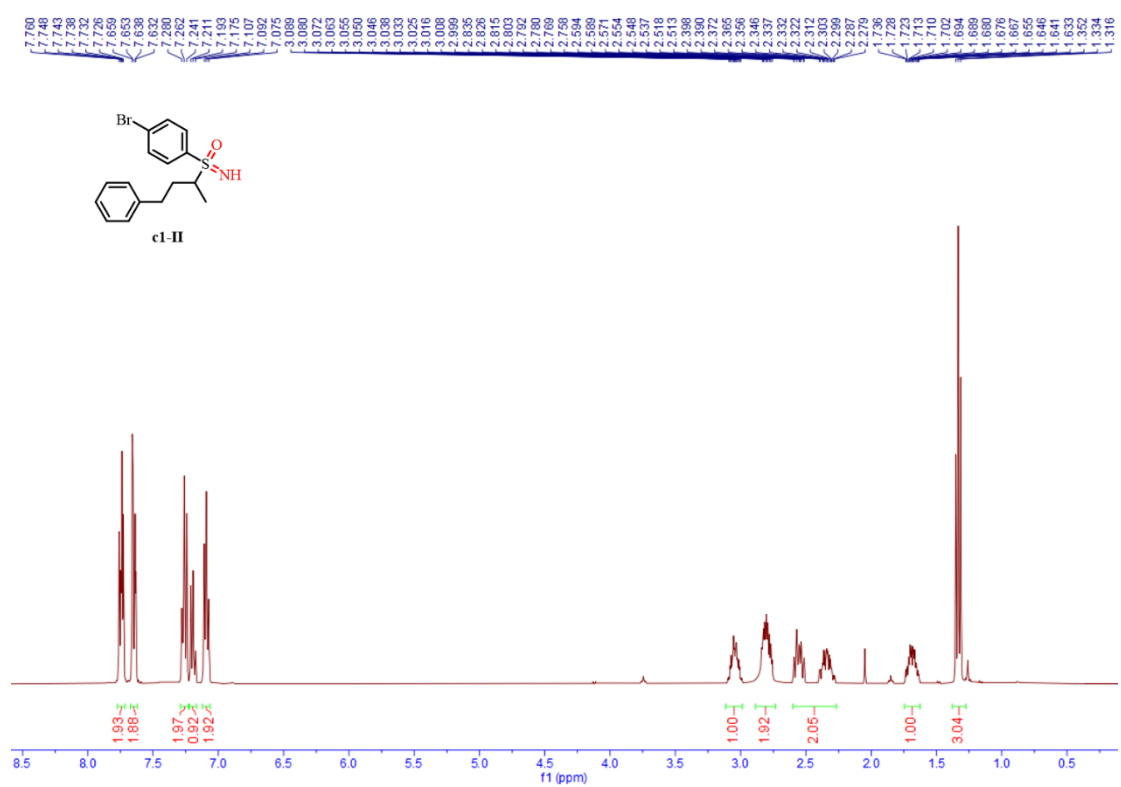

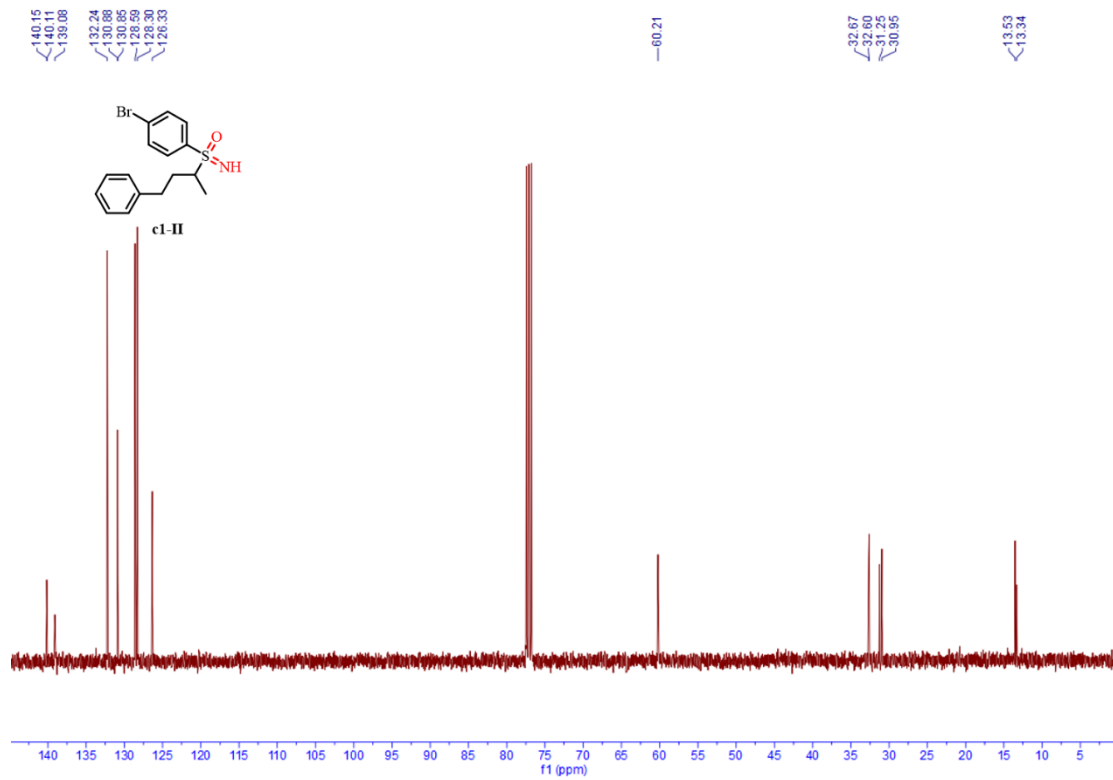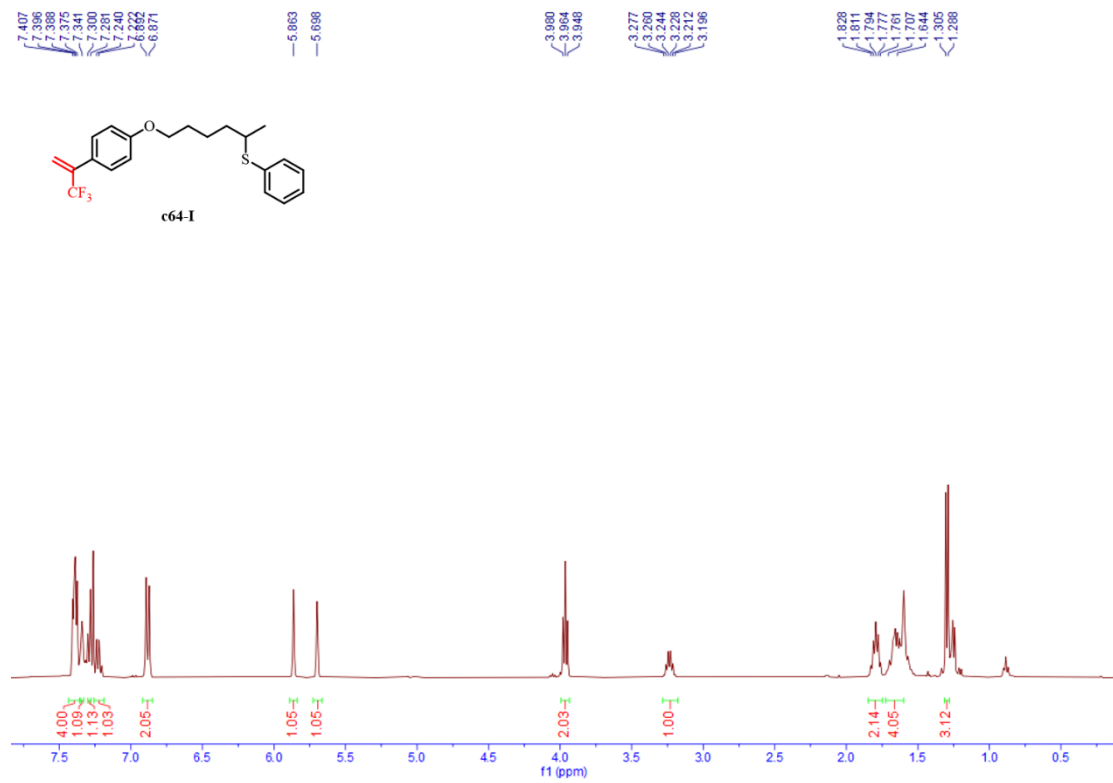

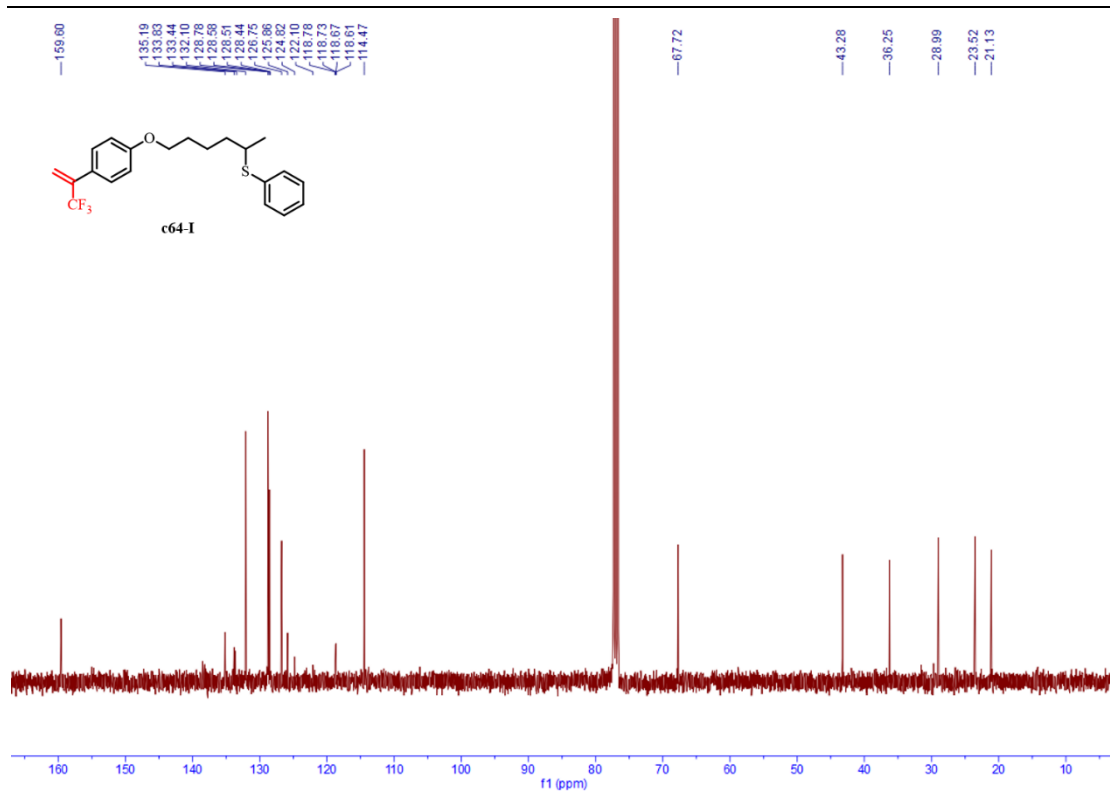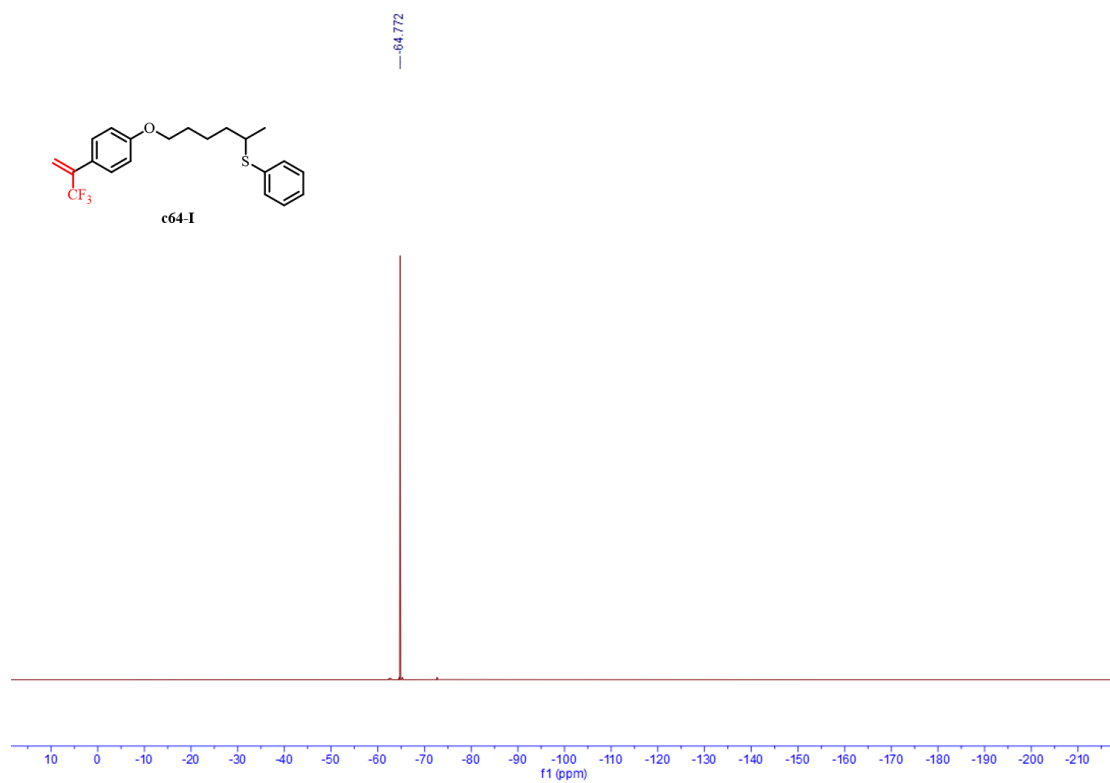

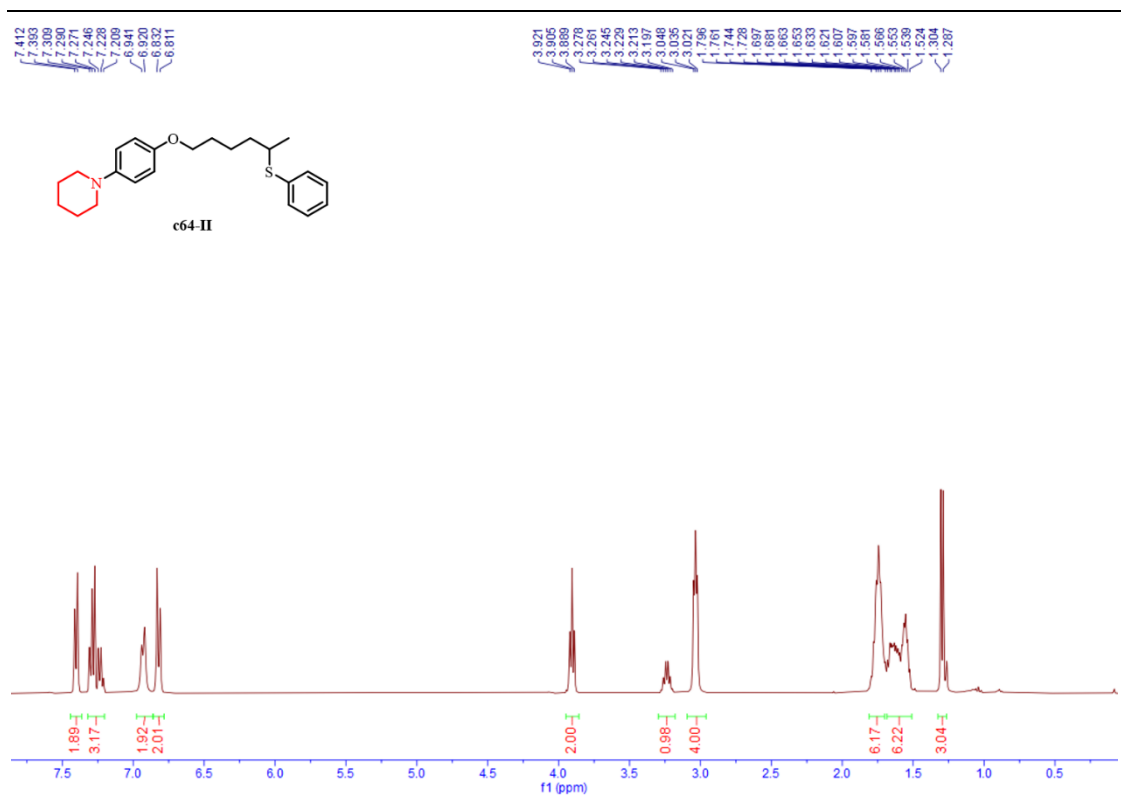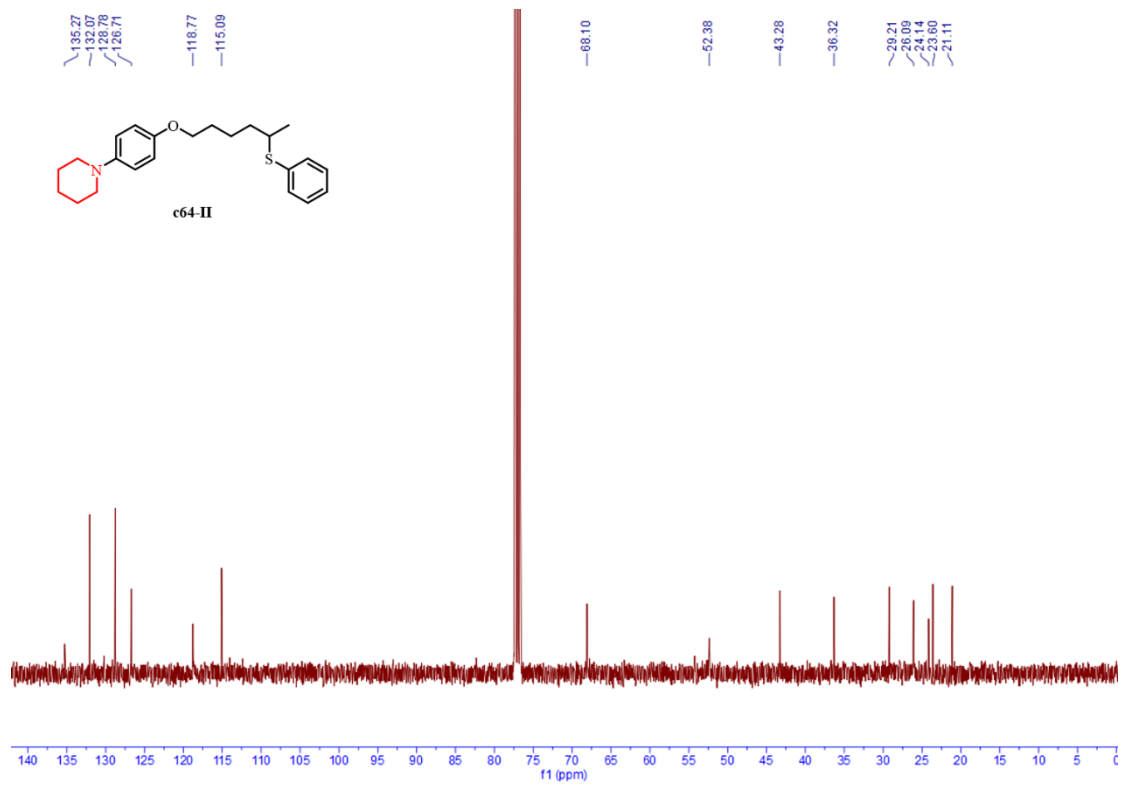

Supplement: d3qo01632c1.pdf [file d3qo01632c1.pdf]
